# Supplementary material for: Synthesis of defined mono-de-N-acetylated β-(1→6)-N-acetyl-d-glucosamine oligosaccharides to characterize PgaB hydrolase activity
Source: Royal Society of Chemistry journal article supplement (doi:10.1039/c9ob02079a), 2019-01-01
Supplement: c9ob02079a1.pdf [file c9ob02079a1.pdf]

# Synthesis of defined mono-de-*N*-acetylated $\beta$ -(1 $\rightarrow$ 6)-*N*-acetyl-D-glucosamine oligosaccharides to characterize PgaB hydrolase activity

Adam Forman,<sup>a</sup> Roland Pfoh,<sup>b</sup> Alexander Eddenden,<sup>a</sup> P. Lynne Howell<sup>b,c</sup> and Mark Nitz<sup>\*a</sup>

<sup>a</sup>*Department of Chemistry, University of Toronto, 80 St. George Street, Toronto, ON, Canada M5S 3H6*

<sup>b</sup>*Program in Molecular Medicine, The Hospital for Sick Children, 686 Bay Street, Toronto, ON, Canada M5G 0A4*

<sup>c</sup>*Department of Biochemistry, Faculty of Medicine, University of Toronto, 1 King's College Circle, Toronto, ON, Canada M5S 1A8*

*\*Corresponding author; Email address: mark.nitz@utoronto.ca; Tel: +1 416-946-0640*

## Supplementary Information

### Table of contents

|                                                                                     |     |
|-------------------------------------------------------------------------------------|-----|
| Figures S1 – S4 .....                                                               | 2   |
| Tables S1 – S2 .....                                                                | 4   |
| Synthesis of compounds <b>5 – 41, 44 – 47</b> .....                                 | 5   |
| NMR spectra of compounds <b>1 – 4, 6 – 30, 34, 36 – 39, 41, 44 – 47</b> .....       | 38  |
| ESI mass spectra of compounds <b>2, 3</b> , and PgaB C-terminal domain assays ..... | 131 |
| References .....                                                                    | 135 |

## Supplementary figures and tables

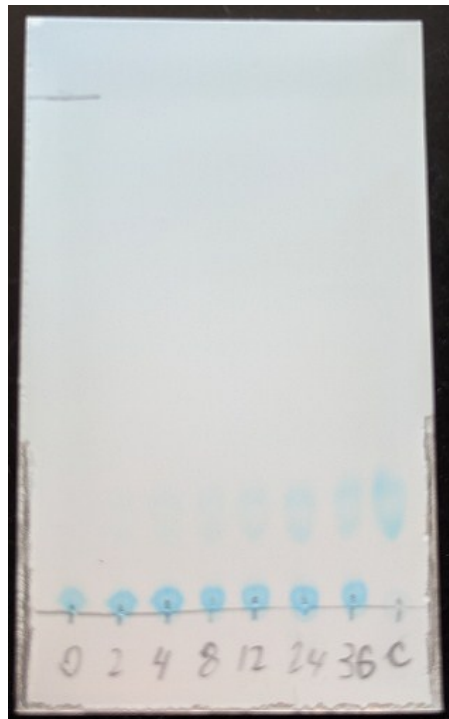

**Figure S1** TLC plate imaged in Fig. 3A.

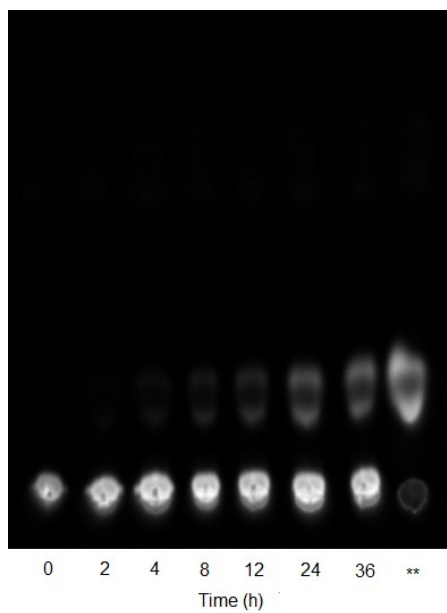

**Figure S2** TLC plate from Fig. S1 visualized by fluorescence imaging (exposure time of 80 ms). \*\*Disaccharide **44** labelled by DBCO-Cy5.

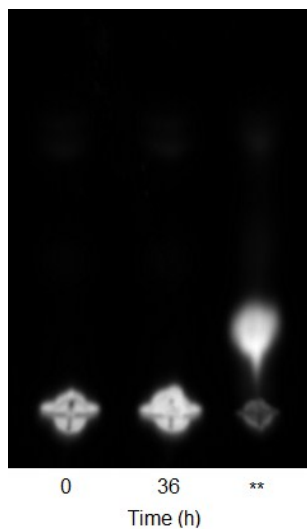

**Figure S3** Negative control experiment (no enzyme present) for heptasaccharide **4** (5 mM), incubated in 100 mM HEPES, pH 7.0. Time point aliquots were labelled with DBCO-Cy5 for 1 h by diluting the 1  $\mu$ L aliquots with 1  $\mu$ L of 1 mM DBCO-Cy5, then analyzed by TLC (1:1:2 H<sub>2</sub>O/AcOH/*n*BuOH) and visualized by fluorescence imaging (exposure time 80 ms). \*\*Disaccharide **44** labelled by DBCO-Cy5.

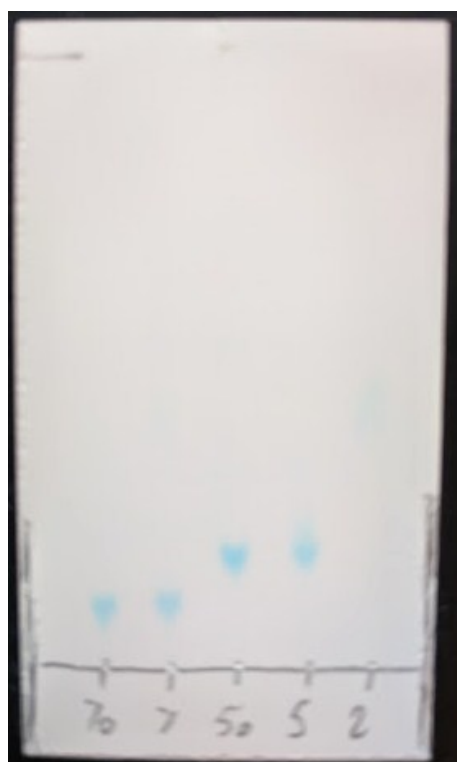

**Figure S4** TLC plate imaged in Fig. 4.

**Table S1** Yield of products **35** and **36**.<sup>1,2</sup>

| Temp. <sup>a</sup> (°C) | Time <sup>a</sup> (h) | <b>35</b> (%) | <b>36</b> (%) |
|-------------------------|-----------------------|---------------|---------------|
| 40                      | 2                     | 83            | -             |
| 50                      | 2                     | 7             | 41            |
| 60                      | 20                    | -             | 64            |

<sup>a</sup> Conditions for the deprotection of **34** using aq. NaOH.

**Table S2** Raw fluorescence integration values from Fig. 5, calculated from TLC plates with an exposure time of 80ms (as seen in Fig. S2).

| Time (h) | Replicate 1 |          |              | Replicate 2 |          |              | Average Turnover (%) |
|----------|-------------|----------|--------------|-------------|----------|--------------|----------------------|
|          | <b>44</b>   | <b>4</b> | Turnover (%) | <b>44</b>   | <b>4</b> | Turnover (%) |                      |
| 0        | 11          | 2014     | 0.5          | 0           | 1142     | 0.0          | 0.3 ± 0.4            |
| 2        | 102         | 2109     | 4.6          | 47          | 1676     | 2.7          | 3.7 ± 1.3            |
| 4        | 155         | 2014     | 7.1          | 152         | 1994     | 7.1          | 7.1 ± 0.0            |
| 8        | 240         | 1587     | 13.1         | 275         | 1903     | 12.6         | 12.9 ± 0.4           |
| 12       | 467         | 1918     | 19.6         | 423         | 1951     | 17.8         | 18.7 ± 1.2           |
| 24       | 1095        | 2279     | 32.5         | 819         | 1870     | 30.5         | 31.5 ± 1.4           |
| 36       | 1378        | 2334     | 37.1         | 1038        | 1898     | 35.4         | 36.2 ± 1.3           |



## Synthesis

### 1,3,4,6-Tetra-O-acetyl-2-trifluoroacetamido-2-deoxy-D-glucopyranose (5)

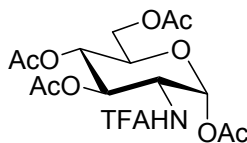

Known<sup>3,4</sup> trifluoroacetamido tetraacetate **5** (2:1  $\alpha/\beta$ ) was synthesized as described previously.<sup>5</sup> <sup>1</sup>H NMR (400 MHz, Chloroform-*d*)  $\delta_{\text{H}}$  7.03 (d,  $J = 9.6$  Hz, 1H, N-H $\beta$ ), 6.57 (d,  $J = 8.7$  Hz, 1H, N-H $\alpha$ ), 6.25 (d,  $J = 3.7$  Hz, 1H, H-1 $\alpha$ ), 5.75 (d,  $J = 8.7$  Hz, 1H, H-1 $\beta$ ), 5.31 (dd,  $J = 10.5, 9.4$  Hz, 1H, H-3 $\alpha$ ), 5.27 (dd,  $J = 10.6, 9.4$  Hz, 1H, H-3 $\beta$ ), 5.23 (t,  $J = 9.6$  Hz, 1H, H-4 $\alpha$ ), 5.14 (t,  $J = 9.6$  Hz, 1H, H-4 $\beta$ ), 4.44 (ddd,  $J = 10.7, 8.7, 3.7$  Hz, 1H, H-2 $\alpha$ ), 4.34 (q,  $J = 9.7$  Hz, 1H, H-2 $\beta$ ), 4.28 (dd,  $J = 12.5, 4.2$  Hz, 2H, H-6 $\alpha, \beta$ ), 4.14 (dd,  $J = 12.6, 2.3$  Hz, 1H, H-6 $\beta$ ), 4.07 (dd,  $J = 12.3, 2.4$  Hz, 1H, H-6 $\alpha$ ), 4.03 (ddd,  $J = 10.0, 4.1, 2.4$  Hz, 1H, H-5 $\alpha$ ), 3.86 (ddd,  $J = 9.9, 4.7, 2.3$  Hz, 1H, H-5 $\beta$ ), 2.20 (s, 3H, 1  $\times$  A $\alpha$ ), 2.12 (s, 3H, 1  $\times$  A $\beta$ ), 2.09 (s, 6H, 1  $\times$  A $\alpha, \beta$ ), 2.06 (s, 3H, 1  $\times$  A $\alpha$ ), 2.06 (s, 6H, 1  $\times$  A $\alpha, \beta$ ), 2.05 (s, 3H, 1  $\times$  A $\beta$ ).

### *p*-Tolyl 3,4,6-tri-O-acetyl-2-trifluoroacetamido-2-deoxy- $\beta$ -1-thio-D-glucopyranoside (6)

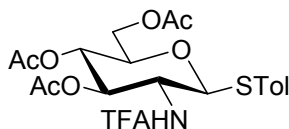

Known<sup>3,4</sup> trifluoroacetamido tetraacetate **5** (9.67 g, 21.8 mmol, 2:1  $\alpha/\beta$ ) and *p*-thiocresol (8.13 g, 65.5 mmol, 3 equiv.) was dissolved in freshly distilled CH<sub>2</sub>Cl<sub>2</sub> (97 mL). BF<sub>3</sub>·Et<sub>2</sub>O (13.7 mL, 109.1 mmol, 5 equiv.) was added at room temperature. The reaction was stirred under Ar for 40 h (TLC in 3:7 EtOAc/pentanes, R<sub>f</sub> = 0.4). The solution was diluted with CH<sub>2</sub>Cl<sub>2</sub> (80 mL) then washed carefully with sat. aq. NaHCO<sub>3</sub> (2  $\times$  120 mL). The aqueous layers were re-extracted with CH<sub>2</sub>Cl<sub>2</sub> (2  $\times$  30 mL). The organic layers were dried over Na<sub>2</sub>SO<sub>4</sub> and concentrated. Column chromatography (EtOAc/pentanes, 2:8  $\rightarrow$  4:6) gave thioglycoside **6** (9.32 g, 84%) as a white/pale yellow flaky solid. <sup>1</sup>H NMR (400 MHz, Chloroform-*d*)  $\delta_{\text{H}}$  7.32 (d,  $J = 8.1$  Hz, 2H, 2  $\times$  Ar), 7.24 (d,  $J = 9.4$  Hz, 1H, N-H), 7.04 (d,  $J = 8.1$  Hz, 2H, 2  $\times$  Ar), 5.24 (dd,  $J = 10.2, 9.5$  Hz, 1H, H-3), 4.93 (t,  $J = 9.8$  Hz, 1H, H-4), 4.63 (d,  $J = 10.4$  Hz, 1H, H-1), 4.14 (dd,  $J = 12.3, 5.2$  Hz, 1H, H-6a), 4.10 (dd,  $J = 12.3, 4.1$  Hz, 1H, H-6b), 4.01 (q,  $J = 10.1$  Hz, 1H, H-2), 3.69 (ddd,  $J = 10.0, 4.9, 2.9$  Hz, 1H, H-5), 2.27 (s, 3H, ArCH<sub>3</sub>), 2.00, 1.93, 1.79 (3 s, 9H, 3 Ac). <sup>13</sup>C NMR (100 MHz, Chloroform-*d*)  $\delta_{\text{C}}$  171.64, 170.66, 169.24 (3  $\times$  COCH<sub>3</sub>), 157.16 (d,  $J = 37.7$  Hz, COCF<sub>3</sub>), 139.18 (1  $\times$  4° Ar), 134.15 (2  $\times$  Ar), 129.77 (2  $\times$  Ar), 127.24 (1  $\times$  4° Ar), 115.66 (d,  $J = 288.1$  Hz, CF<sub>3</sub>), 86.15 (C-1), 75.83 (C-5), 73.64 (C-3), 68.52 (C-4), 62.34 (C-6), 53.02 (C-2), 21.16 (ArCH<sub>3</sub>), 20.70, 20.36, 20.30 (3  $\times$  COCH<sub>3</sub>). *m/z* (ESI) calculated for C<sub>21</sub>H<sub>28</sub>N<sub>2</sub>O<sub>8</sub>F<sub>3</sub>S [M+NH<sub>4</sub>]<sup>+</sup> 525.15, found 525.2.

### *p*-Tolyl 2-trifluoroacetamido-2-deoxy- $\beta$ -1-thio-D-glucopyranoside (7)

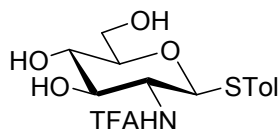

Thioglycoside **6** (5.60 g, 11.0 mmol) was suspended in MeOH (110 mL). Sodium (85 mg, 3.7 mmol, 0.33 equiv.) was added. The reaction was stirred at RT for 2.5 h (TLC in 10:1 CH<sub>2</sub>Cl<sub>2</sub>/MeOH, R<sub>f</sub> = 0.3), then quenched with Dowex 50WX8 cation exchange resin (hydrogen form, 50-100 mesh). The resin was filtered and washed with MeOH (3 × 40 mL). The filtrate was concentrated giving triol **7** (4.30 g, quant.) as a white flaky solid. <sup>1</sup>H NMR (400 MHz, Methanol-*d*<sub>4</sub>) δ<sub>H</sub> 7.39 (d, *J* = 8.2 Hz, 2H, 2 × Ar), 7.12 (d, *J* = 8.0 Hz, 2H, 2 × Ar), 4.75 (d, *J* = 10.4 Hz, 1H, H-1), 3.87 (dd, *J* = 12.2, 2.0 Hz, 1H, H-6a), 3.75 (t, *J* = 10.1 Hz, 1H, H-2), 3.69 (dd, *J* = 12.1, 5.2 Hz, 1H, H-6b), 3.52 (dd, *J* = 9.9, 8.0 Hz, 1H, H-3), 3.35 (t, *J* = 9.7 Hz, 1H, H-4), 3.31 (m, 1H, H-5), 2.30 (s, 3H, CH<sub>3</sub>). <sup>13</sup>C NMR (100 MHz, Methanol-*d*<sub>4</sub>) δ<sub>C</sub> 139.06 (1 × 4° Ar), 133.57 (2 × Ar), 130.97 (1 × 4° Ar), 130.61 (2 × Ar), 87.92 (C-1), 82.25 (C-5), 76.76 (C-3), 71.78 (C-4), 62.83 (C-6), 56.57 (C-2), 21.14 (CH<sub>3</sub>). *m/z* (ESI) calculated for C<sub>15</sub>H<sub>18</sub>NO<sub>5</sub>F<sub>3</sub>NaS [M+Na]<sup>+</sup> 404.07, found 404.1.

***p*-Tolyl 3,4-di-O-benzoyl-6-*tert*-butyldiphenylsilyl-2-trifluoroacetamido-2-deoxy-β-1-thio-D-glucopyranoside (**8**)**

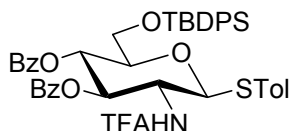

Triol **7** (4.30 g 11.3 mmol) and DMAP (140 mg, 1.15 mmol, 0.1 equiv.) were dissolved in dry pyridine (130 mL). TBDPSCl (5.9 mL, 22.7 mmol, 2 equiv.) was added. The reaction was stirred at RT under Ar for 24 h (TLC in 1:1 CH<sub>2</sub>Cl<sub>2</sub>/MeOH, R<sub>f</sub> = 0.7), then BzCl (7.9 mL, 68.1 mmol, 6 equiv.) was added, and stirring continued under the same conditions for an additional 23 h (TLC in 2:8 EtOAc/pentanes, R<sub>f</sub> = 0.6). The solution was co-concentrated with toluene. The residue was dissolved in CH<sub>2</sub>Cl<sub>2</sub> (250 mL) then washed with 1 M HCl (2 × 200 mL) then aq. NaHCO<sub>3</sub> (200 mL). The aqueous layers were re-extracted with CH<sub>2</sub>Cl<sub>2</sub> (2 × 50 mL each). The organic layers were dried over Na<sub>2</sub>SO<sub>4</sub> and concentrated. Column chromatography (EtOAc/pentanes, 1:9 → 3:7) gave **8** (9.30 g, quant.) as a white amorphous solid. <sup>1</sup>H NMR (400 MHz, Chloroform-*d*) δ<sub>H</sub> 7.88 (dd, *J* = 8.4, 1.3 Hz, 2H, 2 × SiPh), 7.80 (dd, *J* = 8.4, 1.3 Hz, 2H, 2 × Bz), 7.73 (dd, *J* = 8.0, 1.5 Hz, 2H, 2 × SiPh), 7.57 (dd, *J* = 8.0, 1.4 Hz, 2H, 2 × Bz), 7.49 – 7.44 (m, 4H, 2 × SAr, 2 × SiPh), 7.40 – 7.27 (m, 8H, 4 × Bz, 4 × SiPh), 7.15 (t, *J* = 7.9 Hz, 2H, 2 × Bz), 7.05 (d, *J* = 8.0 Hz, 2H, 2 × SAr), 6.88 (d, *J* = 9.3 Hz, 1H, N-H), 5.72 (t, *J* = 9.8 Hz, 1H, H-3), 5.66 (t, *J* = 9.3 Hz, 1H, H-4), 4.96 (d, *J* = 10.3 Hz, 1H, H-1), 4.27 (q, *J* = 9.8 Hz, 1H, H-2), 3.93 – 3.77 (m, 3H, H-5, H-6a, H-6b), 2.32 (s, 3H, ArCH<sub>3</sub>), 1.05 (s, 9H, Si(CH<sub>3</sub>)<sub>3</sub>). <sup>13</sup>C NMR (100 MHz, Chloroform-*d*) δ<sub>C</sub> 167.30, 164.84 (2 × COPh), 157.14 (d, *J* = 37.8 Hz, COCF<sub>3</sub>), 138.73 (1 × 4° SAr), 135.68 (2 × Bz), 135.51 (2 × Bz), 133.78 (2 × SAr), 133.76, 133.35 (2 × 4° Bz), 132.79 (2 × SiPh), 129.95 (2 × SiPh), 129.88 (2 × SAr), 129.71, 129.63 (2 × Bz), 129.57 (2 × SiPh), 129.04 (1 × 4° SiPh), 128.51 (2 × SiPh), 128.42 (2 × SiPh), 128.26 (1 × 4° SiPh), 127.73 (2 × Bz), 127.63 (2 × Bz), 127.55 (1 × 4° SAr), 115.54 (d, *J* = 288.2 Hz, CF<sub>3</sub>), 86.31 (C-1), 79.30 (C-5), 74.48 (C-3), 68.47 (C-4), 62.50 (C-6), 53.84 (C-2), 26.65 (C(CH<sub>3</sub>)<sub>3</sub>), 21.23 (ArCH<sub>3</sub>). *m/z* (ESI) calculated for C<sub>45</sub>H<sub>48</sub>N<sub>2</sub>O<sub>7</sub>F<sub>3</sub>SiS [M+NH<sub>4</sub>]<sup>+</sup> 845.29, found 845.3.

***p*-Tolyl 3,4-di-O-benzoyl-2-trifluoroacetamido-2-deoxy- $\beta$ -1-thio-D-glucopyranoside (9)**

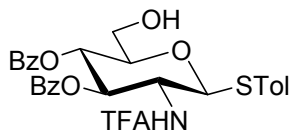

The di-O-benzoyl ester **8** (6.50 g, 7.9 mmol) was dissolved in dry THF (110 mL). AcOH (4.5 mL, 78.6 mmol, 10 equiv.) was added, followed by TBAF (1.0 M in THF, 39 mL, 39.0 mmol, 5 equiv.). The reaction was stirred at RT under N<sub>2</sub> for 18 h (TLC in 3:7 EtOAc/pentanes, R<sub>f</sub> = 0.5). The solution was diluted with EtOAc (150 mL) then washed with sat. aq. NH<sub>4</sub>Cl (200 mL). The aqueous layer was re-extracted with EtOAc (2 × 50 mL). The organic layers were dried over Na<sub>2</sub>SO<sub>4</sub> and concentrated. Column chromatography (CH<sub>2</sub>Cl<sub>2</sub>/MeOH, 100:1 → 40:1) gave acceptor **9** (4.5 g, 97%) as a white powder. <sup>1</sup>H NMR (400 MHz, DMSO-*d*<sub>6</sub>)  $\delta$ <sub>H</sub> 9.84 (d, *J* = 9.1 Hz, 1H, N-H), 7.84 (dd, *J* = 8.5, 1.5 Hz, 2H, 2 × Bz), 7.75 (dd, *J* = 8.5, 1.4 Hz, 2H, 2 × Bz), 7.65 – 7.57 (m, 2H, 2 × Bz), 7.51 – 7.40 (m, 6H, 4 × Bz, 2 × SAr), 7.20 (d, *J* = 7.9 Hz, 2H, 2 × SAr), 5.64 (t, *J* = 9.7 Hz, 1H, H-3), 5.34 (t, *J* = 9.7 Hz, 1H, H-4), 5.21 (d, *J* = 10.3 Hz, 1H, H-1), 4.98 (t, *J* = 5.6 Hz, 1H, 6-OH), 4.11 (q, *J* = 9.9 Hz, 1H, H-2), 3.92 (ddd, *J* = 10.0, 4.8, 2.3 Hz, 1H, H-5), 3.63 (ddd, *J* = 12.3, 4.9, 2.3 Hz, 1H, H-6a), 3.54 (m, 1H, H-6b), 2.31 (s, 3H, ArCH<sub>3</sub>). <sup>13</sup>C NMR (100 MHz, DMSO-*d*<sub>6</sub>)  $\delta$ <sub>C</sub> 165.67, 165.01 (2 × C<sub>OPh</sub>), 156.54 (d, *J* = 36.8 Hz, COCF<sub>3</sub>), 138.04 (1 × 4° SAr), 134.11 (2 × Bz), 132.49 (2 × SAr), 130.20 (2 × SAr), 129.61 (2 × Bz), 129.50 (2 × Bz), 129.27 (1 × 4° Bz), 129.21 (2 × Bz), 129.15 (2 × Bz), 128.98 (1 × 4° Bz), 128.65 (2 × 4° SAr), 116.07 (d, *J* = 288.3 Hz, CF<sub>3</sub>), 84.91 (C-1), 78.71 (C-5), 74.81 (C-3), 69.55 (C-4), 60.60 (C-6), 53.25 (C-2), 21.10 (ArCH<sub>3</sub>). *m/z* (ESI) calculated for C<sub>29</sub>H<sub>30</sub>N<sub>2</sub>O<sub>7</sub>F<sub>3</sub>S [M+NH<sub>4</sub>]<sup>+</sup> 607.17, found 607.2.

***p*-Tolyl 3,4-di-O-benzoyl-6-chloroacetyl-2-trifluoroacetamido-2-deoxy- $\beta$ -1-thio-D-glucopyranoside (10)**

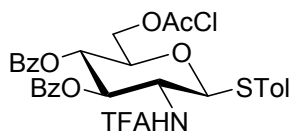

Acceptor **9** (3.70 g 6.3 mmol) was dissolved in CH<sub>2</sub>Cl<sub>2</sub> (63 mL). Pyridine (2.0 mL, 24.7 mmol, 4 equiv.) was added, followed by chloroacetyl chloride (1.0 mL, 12.6 mmol, 2 equiv.). The reaction was stirred at RT for 15 min (TLC in 3:7 EtOAc/pentanes, R<sub>f</sub> = 0.7). The solution was diluted with CH<sub>2</sub>Cl<sub>2</sub> (30 mL) then washed with 1 M HCl (2 × 75 mL) then aq. NaHCO<sub>3</sub> (75 mL). The aqueous layers were re-extracted with CH<sub>2</sub>Cl<sub>2</sub> (2 × 15 mL each). The organic layers were dried over Na<sub>2</sub>SO<sub>4</sub> and concentrated, giving chloroacetate **10** (4.30 g, quant.) as white crystals/pale yellow flakes. <sup>1</sup>H NMR (400 MHz, Chloroform-*d*)  $\delta$ <sub>H</sub> 7.84 (ddd, *J* = 9.9, 8.3, 1.3 Hz, 4H, 4 × Bz), 7.51 (t, *J* = 7.5 Hz, 1H, 1 × Bz), 7.46 (t, *J* = 7.5 Hz, 1H, 1 × Bz), 7.42 (d, *J* = 8.1 Hz, 2H, 2 × SAr), 7.34 (dd, *J* = 8.3, 7.4 Hz, 2H, 2 × Bz), 7.28 (dd, *J* = 8.5, 7.7 Hz, 2H, 2 × Bz), 7.20 (d, *J* = 9.3 Hz, 1H, N-H), 7.12 (d, *J* = 7.9 Hz, 2H, 2 × SAr), 5.87 (dd, *J* = 10.3, 9.6 Hz, 1H, H-3), 5.50 (t, *J* = 9.8 Hz, 1H, H-4), 5.04 (d, *J* = 10.3 Hz, 1H, H-1), 4.41 (dd, *J* = 12.2, 3.1 Hz, 1H, H-6a), 4.37 (dd, *J* = 12.2, 4.8 Hz, 1H, H-6b), 4.32 (q, *J* = 10.1 Hz, 1H, H-2), 4.08 (ddd, *J* = 10.0, 4.8, 3.0 Hz, 1H, H-5), 3.96 (dd, *J* = 24.5, 15.2 Hz, 2H, CH<sub>2</sub>Cl), 2.34 (s, 3H, ArCH<sub>3</sub>). <sup>13</sup>C NMR (100 MHz, Chloroform-*d*)  $\delta$ <sub>C</sub> 167.14 (COCH<sub>2</sub>Cl), 166.96, 165.10 (2 × C<sub>OPh</sub>), 157.26 (d, *J* = 37.9 Hz, COCF<sub>3</sub>), 139.20 (1 × 4° SAr), 134.14 (2 × SAr), 133.97, 133.74 (2 × Bz), 129.88 (2 ×

SAr), 129.85 (2 × Bz), 129.60 (2 × Bz), 128.57 (2 × Bz), 128.51 (2 × Bz), 128.36, 127.92 (2 × 4° Bz), 126.83 (1 × 4° SAr), 115.44 (d,  $J = 288.1$  Hz, CF<sub>3</sub>), 86.11 (C-1), 75.89 (C-5), 73.71 (C-3), 68.83 (C-4), 63.97 (C-6), 53.60 (C-2), 40.54 (CH<sub>2</sub>Cl), 21.21 (ArCH<sub>3</sub>).  $m/z$  (ESI) calculated for C<sub>31</sub>H<sub>31</sub>N<sub>2</sub>O<sub>8</sub>F<sub>3</sub>SCl [M+NH<sub>4</sub>]<sup>+</sup> 683.14, found 683.1.

**3,4-Di-O-benzoyl-6-chloroacetyl-2-trifluoroacetamido-2-deoxy- $\alpha$ -D-glucopyranosyl bromide (11)**

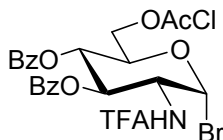

Thioglycoside **10** (3.40 g, 5.10 mmol) was dissolved in dry CH<sub>2</sub>Cl<sub>2</sub> (50 mL). Br<sub>2</sub> (300  $\mu$ L, 5.86 mmol, 1.15 equiv.) was added. The reaction was stirred at RT under Ar in the dark for 1.5 h (TLC in 2:8 EtOAc/pentanes,  $R_f = 0.6$ ). The solution was diluted with CH<sub>2</sub>Cl<sub>2</sub> (30 mL) then washed with 20% aq. Na<sub>2</sub>S<sub>2</sub>O<sub>3</sub> (40 mL), then H<sub>2</sub>O (40 mL). The aqueous layers were re-extracted with CH<sub>2</sub>Cl<sub>2</sub> (2 × 10 mL). The organic layers were dried over Na<sub>2</sub>SO<sub>4</sub> and concentrated under reduced pressure, giving crude bromide donor **11** (3.52 g, quant.) as a yellow amorphous solid. <sup>1</sup>H NMR (400 MHz, Chloroform-*d*)  $\delta_H$  7.95 (dd,  $J = 8.5, 1.5$  Hz, 2H, 2 × Bz), 7.90 (dd,  $J = 8.4, 1.3$  Hz, 2H, 2 × Bz), 7.58 – 7.51 (m, 2H, 2 × Bz), 7.39 (m, 4H, 4 × Bz), 7.12 (d,  $J = 7.3$  Hz, 1H, N-H), 6.69 (d,  $J = 3.7$  Hz, 1H, H-1), 5.80 (t,  $J = 9.5$  Hz, 1H, H-3), 5.76 (t,  $J = 9.6$  Hz, 1H, H-4), 4.58 – 4.50 (m, 2H, H-2, H-5), 4.47 (dd,  $J = 12.6, 4.1$  Hz, 1H, H-6a), 4.40 (dd,  $J = 12.6, 2.5$  Hz, 1H, H-6b), 4.15 (d,  $J = 2.1$  Hz, 2H, CH<sub>2</sub>Cl).

**3,4-Di-O-benzoyl-6-chloroacetyl-2-trifluoroacetamido-2-deoxy- $\beta$ -D-glucopyranosyl-(1 $\rightarrow$ 6)-*p*-Tolyl 3,4-di-O-benzoyl-2-trifluoroacetamido-2-deoxy- $\beta$ -1-thio-D-glucopyranoside (12)**

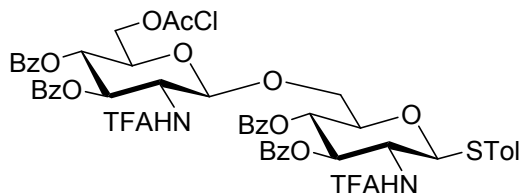

Acceptor **9** (2.00 g, 3.39 mmol) and glycosyl bromide **11** (3.17 g, 5.10 mmol, 1.5 equiv; 3.52 g crude) were dissolved in freshly distilled CH<sub>2</sub>Cl<sub>2</sub> (76 mL) containing freshly activated powdered 4Å MS (5.0 g). The mixture was cooled to -45 °C under Ar in the dark for 1 h. AgOTf (1.74 g, 6.77 mmol, 2 equiv.) in dry toluene (10 mL) was added, and the reaction was stirred for 2 h (TLC in 2:8 acetone/pentanes,  $R_f = 0.2$ ) and then quenched with NEt<sub>3</sub>. The mixture was diluted with CH<sub>2</sub>Cl<sub>2</sub> (80 mL) and filtered through celite. The solids were washed with CH<sub>2</sub>Cl<sub>2</sub> (3 × 80 mL). The filtrate was washed with sat. aq. NaCl (2 × 250 mL). The aqueous layers were re-extracted with CH<sub>2</sub>Cl<sub>2</sub> (2 × 100 mL). The organic layers were dried over Na<sub>2</sub>SO<sub>4</sub> and concentrated. Column chromatography (acetone/hexanes, 2:8 → 3:7) gave disaccharide **12** (3.45 g, 90%) as a pale yellow amorphous solid. <sup>1</sup>H NMR (400 MHz, Chloroform-*d*)  $\delta_H$  7.96 – 7.87 (m, 6H, 6 × Bz), 7.82 (dd,  $J = 8.6, 1.5$  Hz, 2H, 2 × Bz), 7.51 (m, 5H, N-H', 4 × Bz), 7.44 (d,  $J = 8.1$  Hz, 2H, 2 × SAr), 7.35 (m, 8H, 8 × Bz), 7.20 (d,  $J = 8.0$  Hz, 2H, 2 × SAr), 6.92 (d,  $J = 8.7$  Hz, 1H, N-H), 5.92 (t,  $J = 9.9$  Hz, 1H, H-3), 5.65 (t,  $J = 9.7$  Hz, 1H, H-3'), 5.58 (t,  $J = 9.6$  Hz, 1H, H-4'), 5.42 (t,  $J = 9.7$  Hz, 1H, H-4), 5.14 (d,  $J = 10.2$  Hz, 1H, H-1), 4.69 (d,  $J = 8.4$  Hz, 1H,

H-1'), 4.53 (q,  $J = 9.2$  Hz, 1H, H-2'), 4.34 (d,  $J = 3.7$  Hz, 2H, H-6a, H-6b), 4.25 (dd,  $J = 12.0, 2.0$  Hz, 1H, H-6a'), 3.97 (dd,  $J = 23.68, 15.14$  Hz, 2H, CH<sub>2</sub>Cl), 3.95 – 3.88 (m, 3H, H-2, H-5, H-5'), 3.60 (dd,  $J = 11.9, 4.1$  Hz, 1H, H-6b'), 2.37 (s, 3H, ArCH<sub>3</sub>). <sup>13</sup>C NMR (100 MHz, Chloroform-*d*) δ<sub>C</sub> 167.06 (COCH<sub>2</sub>Cl), 166.45, 166.33, 165.91, 165.12 (4 × C<sub>6</sub>H<sub>5</sub>), 157.65 (d,  $J = 37.9$  Hz, 1 × COCF<sub>3</sub>), 157.09 (d,  $J = 38.0$  Hz, 1 × COCF<sub>3</sub>), 139.40 (1 × 4° SAr), 134.07 (1 × Bz), 133.95 (2 × SAr), 133.68 (2 × Bz), 133.64 (1 × Bz), 130.14 (2 × SAr), 129.91 (2 × Bz), 129.86 (2 × Bz), 129.75 (2 × Bz), 129.72 (2 × Bz), 128.59 (1 × Bz), 128.50 (2 × Bz), 128.49 (2 × Bz), 128.47, 128.45 (2 × Bz), 128.35, 128.20, 128.06 (3 × 4° Bz), 126.35 (1 × 4° SAr), 115.89 (d,  $J = 287.8$  Hz, 1 × CF<sub>3</sub>), 115.68 (d,  $J = 288.0$  Hz, 1 × CF<sub>3</sub>), 101.44 (C-1'), 84.85 (C-1), 77.19 (C-5), 72.88 (C-3), 72.61 (C-3'), 72.07 (C-5'), 68.94 (C-4), 68.88 (C-4'), 68.13 (C-6'), 63.58 (C-6), 54.58 (C-2'), 53.83 (C-2), 40.55 (CH<sub>2</sub>Cl), 21.15 (ArCH<sub>3</sub>). *m/z* (ESI) calculated for C<sub>53</sub>H<sub>49</sub>N<sub>3</sub>O<sub>15</sub>F<sub>6</sub>SCl [M+NH<sub>4</sub>]<sup>+</sup> 1148.25, found 1148.2.

**3,4-Di-O-benzoyl-6-chloroacetyl-2-trifluoroacetamido-2-deoxy-β-D-glucopyranosyl-(1→6)-3,4-di-O-benzoyl-2-trifluoroacetamido-2-deoxy-α-D-glucopyranosyl bromide (13)**

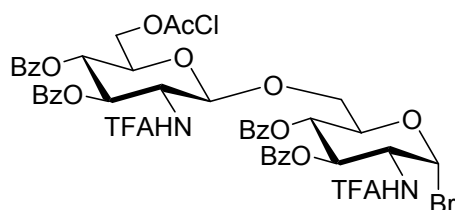

Disaccharide thioglycoside **12** (2.00 g, 1.77 mmol) was dissolved in dry CH<sub>2</sub>Cl<sub>2</sub> (18 mL). Br<sub>2</sub> (118 μL, 2.30 mmol, 1.3 equiv.) was added. The reaction was stirred at RT under Ar in the dark for 1.5 h (TLC in 7:13 EtOAc/pentanes, R<sub>f</sub> = 0.4). The solution was diluted with CH<sub>2</sub>Cl<sub>2</sub> (12 mL) then washed with 20% aq. Na<sub>2</sub>S<sub>2</sub>O<sub>3</sub> (30 mL) then H<sub>2</sub>O (30 mL). The aqueous layers were re-extracted with CH<sub>2</sub>Cl<sub>2</sub> (2 × 7 mL). The organic layers were dried over Na<sub>2</sub>SO<sub>4</sub> and concentrated under reduced pressure, giving crude glycosyl bromide **13** (2.00 g, quant.) as a yellow amorphous solid. <sup>1</sup>H NMR (400 MHz, Chloroform-*d*) δ<sub>H</sub> 8.01 (dd,  $J = 8.5, 1.4$  Hz, 2H, 2 × Bz), 7.95 – 7.84 (m, 6H, 6 × Bz), 7.59 (t,  $J = 7.0$  Hz, 1H, 1 × Bz), 7.52 (t,  $J = 7.5$  Hz, 3H, 3 × Bz), 7.44 (t,  $J = 7.8$  Hz, 2H, 2 × Bz), 7.40 – 7.33 (m, 7H, N-H', 6 × Bz), 7.04 (d,  $J = 7.6$  Hz, 1H, N-H), 6.72 (d,  $J = 3.6$  Hz, 1H, H-1), 5.84 (t,  $J = 9.4$  Hz, 1H, H-3), 5.72 (t,  $J = 9.7$  Hz, 1H, H-3'), 5.68 (t,  $J = 9.4$  Hz, 1H, H-4), 5.56 (t,  $J = 9.6$  Hz, 1H, H-4'), 4.67 (d,  $J = 8.4$  Hz, 1H, H-1'), 4.46 (q,  $J = 8.2$  Hz, 1H, H-2'), 4.43 – 4.34 (m, 2H, H-5, H-5', H-6a, H-6b), 4.30 (dd,  $J = 12.0, 2.1$  Hz, 1H, H-6a'), 4.04 (d,  $J = 1.0$  Hz, 2H, CH<sub>2</sub>Cl), 3.94 (dt,  $J = 9.6, 3.7$  Hz, 1H, H-2), 3.57 (dd,  $J = 11.8, 2.8$  Hz, 1H, H-6b').

**3,4-Di-O-benzoyl-6-chloroacetyl-2-trifluoroacetamido-2-deoxy-β-D-glucopyranosyl-(1→6)-chloropropyl 3,4-di-O-benzoyl-2-trifluoroacetamido-2-deoxy-β-D-glucopyranoside (14)**

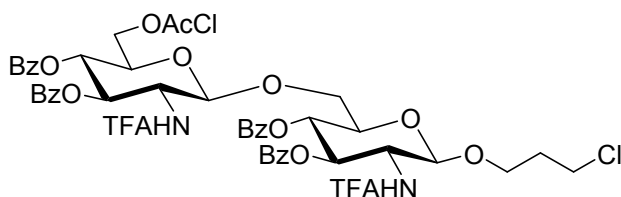

Crude glycosyl bromide **13** (1.92 g, 1.76 mmol; 2.00 g crude) and 3-chloropropanol (1.5 mL, 17.9 mmol, 10 equiv.) were dissolved in freshly distilled CH<sub>2</sub>Cl<sub>2</sub> (25 mL) containing freshly activated powdered 4Å MS (2.5 g). The mixture was cooled to 0 °C under Ar in the dark for 1 h. AgOTf (0.59 g, 2.30 mmol, 1.3 equiv.) in dry toluene (3 mL) was added, and the reaction was stirred under the same conditions for 2 h (TLC in 1:3 acetone/pentanes, R<sub>f</sub> = 0.2), then quenched with NEt<sub>3</sub>. The mixture was diluted with CH<sub>2</sub>Cl<sub>2</sub> (20 mL) and filtered through celite. The solids were washed with CH<sub>2</sub>Cl<sub>2</sub> (3 × 20 mL). The filtrate was washed with sat. aq. NaCl (2 × 80 mL). The aqueous layers were re-extracted with CH<sub>2</sub>Cl<sub>2</sub> (2 × 20 mL). The organic layers were dried over Na<sub>2</sub>SO<sub>4</sub> and concentrated. Column chromatography (EtOAc/pentanes, 28:72 → 4:6) gave disaccharide **14** (1.72 g, 89%) as a white amorphous solid. <sup>1</sup>H NMR (400 MHz, Acetone-*d*<sub>6</sub>) δ<sub>H</sub> 8.78 (d, *J* = 9.0 Hz, 1H, N-H'), 8.68 (d, *J* = 9.2 Hz, 1H, N-H), 7.95 (dd, *J* = 8.4, 1.3 Hz, 2H, 2 × Bz), 7.92 – 7.84 (m, 6H, 6 × Bz), 7.66 – 7.53 (m, 4H, 4 × Bz), 7.51 – 7.38 (m, 8H, 8 × Bz), 5.84 (dd, *J* = 10.6, 9.3 Hz, 1H, H-3), 5.81 (dd, *J* = 10.7, 9.3 Hz, 1H, H-3'), 5.49 (t, *J* = 9.6 Hz, 1H, H-4), 5.48 (t, *J* = 9.8 Hz, 1H, H-4'), 5.16 (d, *J* = 8.4 Hz, 1H, H-1), 5.10 (d, *J* = 8.4 Hz, 1H, H-1'), 4.41 (dd, *J* = 12.2, 5.2 Hz, 1H, H-6a'), 4.37 – 4.31 (m, 2H, H-2, H-6b'), 4.31 – 4.14 (m, 6H, H-2, H-5, H-5', H-6a, COCH<sub>2</sub>Cl), 4.07 (dt, *J* = 10.9, 5.5 Hz, 1H, OCHHCH<sub>2</sub>), 3.87 (dd, *J* = 11.8, 6.1 Hz, 1H, H-6b), 3.79 (ddd, *J* = 12.7, 7.6, 5.0 Hz, 1H, OCHHCH<sub>2</sub>), 3.69 (t, *J* = 6.5 Hz, 2H, CH<sub>2</sub>CH<sub>2</sub>Cl), 2.16 – 1.97 (m, 2H, CH<sub>2</sub>CH<sub>2</sub>CH<sub>2</sub>). <sup>13</sup>C NMR (100 MHz, Acetone-*d*<sub>6</sub>) δ<sub>C</sub> 167.68 (COCH<sub>2</sub>Cl), 166.42 (2 × C<sub>6</sub>H<sub>5</sub>), 166.00, 165.87 (2 × C<sub>6</sub>H<sub>5</sub>), 134.49, 134.45, 134.37, 134.35 (4 × Bz), 130.52 (2 × Bz), 130.40 (2 × Bz), 130.34 (2 × Bz), 130.32 (2 × Bz), 130.14, 130.06, 130.06, 130.03 (4 × 4° Bz), 129.48 (2 × Bz), 129.44 (2 × Bz), 129.40 (2 × Bz), 129.37 (2 × Bz), 101.16 (C-1), 100.97 (C-1'), 73.87 (C-5), 73.76 (C-3), 73.73 (C-3'), 72.58 (C-5'), 70.83 (C-4), 70.46 (C-4'), 69.08 (C-6), 67.01 (OCH<sub>2</sub>CH<sub>2</sub>), 64.45 (C-6'), 55.78 (C-2'), 55.59 (C-2), 42.21 (CH<sub>2</sub>CH<sub>2</sub>Cl), 41.45 (COCH<sub>2</sub>Cl), 33.30 (CH<sub>2</sub>CH<sub>2</sub>CH<sub>2</sub>). *m/z* (ESI) calculated for C<sub>49</sub>H<sub>48</sub>N<sub>3</sub>O<sub>16</sub>F<sub>6</sub>Cl<sub>2</sub> [M+NH<sub>4</sub>]<sup>+</sup> 1128.23, found 1118.24.

**3,4-Di-O-benzoyl-2-trifluoroacetamido-2-deoxy-β-D-glucopyranosyl-(1→6)-chloropropyl 3,4-di-O-benzoyl-2-trifluoroacetamido-2-deoxy-β-D-glucopyranoside (15)**

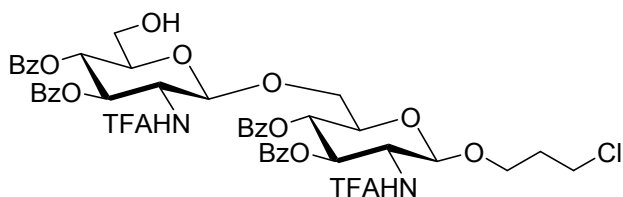

Disaccharide **14** (2.08 g, 1.89 mmol) and thiourea (0.72 g, 9.46 mmol, 5 equiv) were dissolved in a 1:1 mixture of pyridine/EtOH (190 mL). The solution was stirred at 70 °C for 18 h (TLC in 4:6 EtOAc/pentanes, R<sub>f</sub> = 0.3), then co-concentrated with toluene. The residue was dissolved in CH<sub>2</sub>Cl<sub>2</sub> (300 mL) then washed with 1 M HCl (2 × 300 mL) then sat. aq. NaHCO<sub>3</sub> (300 mL). The aqueous layers were re-extracted with CH<sub>2</sub>Cl<sub>2</sub> (2 × 60 mL each), and the organic layers were dried over Na<sub>2</sub>SO<sub>4</sub> and concentrated. Column chromatography (EtOAc/pentanes, 7:13 → 1:1) gave disaccharide acceptor **15** (1.01 g, 52%) as a pale yellow amorphous solid. <sup>1</sup>H NMR (400 MHz, Chloroform-*d*) δ<sub>H</sub> 7.95 – 7.84 (m, 8H, 8 × Bz), 7.53 – 7.44 (m, 5H, N-H', 4 × Bz), 7.41 – 7.28 (m, 9H, N-H, 8 × Bz), 5.81 (dd, *J* = 10.7, 9.5 Hz, 1H, H-3), 5.69 (dd, *J* = 10.6, 9.6 Hz, 1H, H-3'), 5.52 (t, *J* = 9.5 Hz, 1H, H-4), 5.39 (d, *J* = 9.6 Hz, 1H, H-4'), 4.86 (d, *J* = 8.3 Hz, 1H, H-1), 4.76 (d, *J* = 8.4 Hz, 1H, H-1'), 4.36 (dd, *J* = 9.9, 9.3 Hz, 1H, H-2'), 4.24 (dd, *J* = 11.3, 2.4 Hz, 1H, H-6a), 4.13 (dd, *J* = 10.6, 8.5 Hz, 1H, H-2), 4.04 – 3.99 (m, 1H, OCHHCH<sub>2</sub>), 3.95 (ddd, *J* =

9.7, 4.1, 2.6 Hz, 1H, H-5), 3.84 – 3.74 (m, 1H, H-6a'), 3.71 – 3.57 (m, 6H, H-5', H-6b, H-6b', OCHHCH<sub>2</sub>, CH<sub>2</sub>Cl), 2.11 – 1.92 (m, 2H, CH<sub>2</sub>CH<sub>2</sub>CH<sub>2</sub>). <sup>13</sup>C NMR (125 MHz, Chloroform-*d*) δ<sub>C</sub> 166.80, 166.70, 166.04, 165.82 (4 × COPh), 157.62 (d, *J* = 37.6 Hz, 1 × COCF<sub>3</sub>), 157.51 (d, *J* = 37.7 Hz, 1 × COCF<sub>3</sub>), 134.06, 133.84, 133.75, 133.67 (4 × Bz), 129.89 (2 × Bz), 129.85 (2 × Bz), 129.83 (2 × Bz), 129.81 (2 × Bz), 128.66 (2 × Bz), 128.54 (2 × Bz), 128.52 (2 × Bz), 128.49 (2 × Bz), 128.47, 128.34, 128.27, 128.12 (4 × 4° Bz), 115.67 (q, *J* = 289.8 Hz, 1 × CF<sub>3</sub>), 115.47 (q, *J* = 287.6 Hz, 1 × CF<sub>3</sub>), 100.91 (C-1'), 100.55 (C-1), 74.80 (C-5'), 72.98 (C-5), 72.65 (C-3'), 72.09 (C-3), 69.53 (C-4'), 69.00 (C-4), 67.99 (C-6), 66.25 (OCH<sub>2</sub>CH<sub>2</sub>), 61.05 (C-6'), 55.14 (C-2), 54.65 (C-2'), 41.42 (CH<sub>2</sub>Cl), 31.98 (CH<sub>2</sub>CH<sub>2</sub>CH<sub>2</sub>). *m/z* (ESI) calculated for C<sub>47</sub>H<sub>47</sub>N<sub>3</sub>O<sub>15</sub>F<sub>6</sub>Cl [M+NH<sub>4</sub>]<sup>+</sup> 1042.26, found 1042.26.

***p*-Tolyl 3,4-di-O-benzoyl-6-chloroacetyl-2-phthalimido-2-deoxy-β-1-thio-D-glucopyranoside (16)**

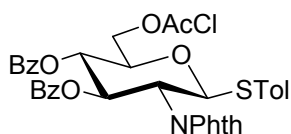

Known<sup>6</sup> phthalimido-protected thioglycoside **16** was synthesized as described previously.<sup>7</sup> <sup>1</sup>H NMR (400 MHz, Chloroform-*d*) δ<sub>H</sub> 7.92 – 7.85 (m, 3H, 2 × Bz, 1 × Phth), 7.74 – 7.67 (m, 5H, 2 × Bz, 3 × Phth), 7.49 (tt, *J* = 6.8, 1.2 Hz, 1H, 1 × Bz), 7.41 (tt, *J* = 7.0, 1.2 Hz, 1H, 1 × Bz), 7.37 – 7.32 (m, 4H, 2 × SAr, 2 × Bz), 7.24 (t, *J* = 7.9 Hz, 2H, 2 × Bz), 7.12 (d, 2H, 2 × SAr), 6.25 (dd, *J* = 10.3, 9.3 Hz, 1H, H-3), 5.81 (d, *J* = 10.5 Hz, 1H, H-1), 5.54 (dd, *J* = 10.1, 9.3 Hz, 1H, H-4), 4.55 (t, *J* = 10.4 Hz, 1H, H-2), 4.42 (d, *J* = 4.3 Hz, 2H, H-6a, H-6b), 4.14 (ddd, 1H, H-5), 4.08 (d, *J* = 1.8 Hz, 2H, CH<sub>2</sub>Cl), 2.35 (s, 3H, ArCH<sub>3</sub>). <sup>13</sup>C NMR (100 MHz, Chloroform-*d*) δ<sub>C</sub> 166.92 (COCH<sub>2</sub>Cl), 165.60, 165.20 (2 × OCOPh), 138.92 (1 × 4° SAr), 134.32, 134.21 (2 × Phth), 134.06 (2 × SAr), 133.56, 133.29 (2 × Bz), 129.80 (2 × Bz), 129.72 (2 × SAr), 129.71 (2 × Bz), 128.56 (1 × 4° Bz), 128.44 (2 × Bz), 128.27 (2 × Bz), 126.84 (1 × 4° SAr), 123.67 (2 × Phth), 83.44 (C-1), 75.81 (C-5), 71.85 (C-3), 69.44 (C-4), 64.00 (C-6), 53.76 (C-2), 40.68 (CH<sub>2</sub>Cl), 21.21 (ArCH<sub>3</sub>). *m/z* (ESI) calculated for C<sub>37</sub>H<sub>30</sub>NO<sub>9</sub>NaSCL [M+Na]<sup>+</sup> 722.12, found 722.13.

**3,4-di-O-benzoyl-6-chloroacetyl-2-phthalimido-2-deoxy-β-D-glucopyranosyl bromide (17)**

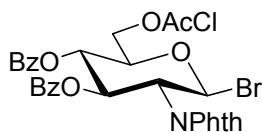

Known<sup>6</sup> thioglycoside **16** (423 mg, 0.604 mmol) was dissolved in dry CH<sub>2</sub>Cl<sub>2</sub> (6 mL). Br<sub>2</sub> (36 μL, 0.703 mmol, 1.15 equiv.) was added. The reaction was stirred at RT under Ar in the dark for 1.5 h (TLC in 2:8 EtOAc/pentanes, R<sub>f</sub> = 0.3). The solution was diluted with CH<sub>2</sub>Cl<sub>2</sub> (4 mL) then washed with 20% aq. Na<sub>2</sub>S<sub>2</sub>O<sub>3</sub> (10 mL) then H<sub>2</sub>O (10 mL). The aqueous layers were re-extracted with CH<sub>2</sub>Cl<sub>2</sub> (2 × 2 mL). The organic layers were dried and concentrated, giving crude glycosyl bromide **17** (438 mg, quant.) as a white amorphous solid. <sup>1</sup>H NMR (400 MHz, Chloroform-*d*) δ<sub>H</sub> 7.89 (dd, *J* = 8.4, 1.3 Hz, 2H, 2 × Bz), 7.83 (bs, 2H, 2 × Phth), 7.77 – 7.69 (m, 4H, 2 × Bz, 2 × Phth), 7.51 (tt, *J* = 7.0, 1.3 Hz, 1H, 1 × Bz), 7.44 (tt, *J* = 7.1, 1.3 Hz, 1H, 1 × Bz), 7.39 – 7.34 (m, 2H, 2 × Bz), 7.30 – 7.24 (m, 2H, 2 × Bz), 6.56 (d, *J* = 9.6 Hz, 1H, H-1), 6.22 (dd, *J* = 10.4, 9.3 Hz, 1H, H-3), 5.69 (dd, *J* = 10.1, 9.4 Hz, 1H, H-4), 4.86 (dd, *J* = 10.4, 9.6 Hz, 1H, H-2), 4.46

(dd,  $J = 12.5, 4.7$  Hz, 1H, H-6a), 4.41 (dd,  $J = 12.5, 2.7$  Hz, 1H, H-6b), 4.22 (ddd,  $J = 10.2, 4.6, 2.7$  Hz, 1H, H-5), 4.16 (d,  $J = 1.7$  Hz, 2H, CH<sub>2</sub>Cl).

**3,4-Di-O-benzoyl-6-chloroacetyl-2-phthalimido-2-deoxy-β-D-glucopyranosyl-(1→6)-3,4-di-O-benzoyl-2-trifluoroacetamido-2-deoxy-β-D-glucopyranosyl-(1→6)-chloropropyl 3,4-di-O-benzoyl-2-trifluoroacetamido-2-deoxy-β-D-glucopyranoside (18)**

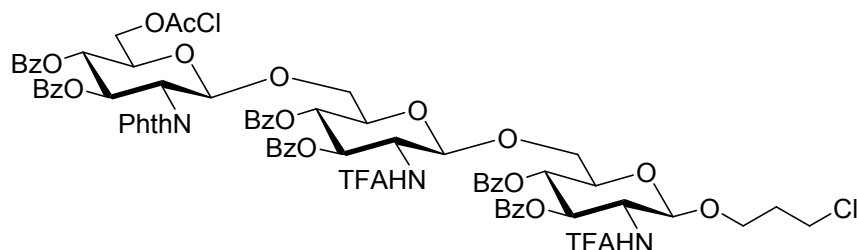

Disaccharide acceptor **15** (310 mg, 0.302 mmol) and glycosyl bromide **17** (397 mg, 0.604 mmol, 2 equiv; 438 mg crude) were dissolved in freshly distilled CH<sub>2</sub>Cl<sub>2</sub> (9 mL) containing freshly activated powdered 4Å MS (0.90 g). The mixture was cooled to -45 °C under Ar in the dark for 1 h. AgOTf (210 mg, 0.817 mmol, 2.7 equiv.) in dry toluene (1.8 mL) was added, and the reaction was stirred under the same conditions for 2 h (TLC in 4:6 EtOAc/pentanes, R<sub>f</sub> = 0.5), then quenched with NEt<sub>3</sub>. The mixture was diluted with CH<sub>2</sub>Cl<sub>2</sub> (30 mL) and filtered through celite. The solids were washed with CH<sub>2</sub>Cl<sub>2</sub> (3 × 30 mL). The filtrate was washed with sat. aq. NaCl (2 × 90 mL). The aqueous layers were re-extracted with CH<sub>2</sub>Cl<sub>2</sub> (2 × 15 mL). The organic layers were dried over Na<sub>2</sub>SO<sub>4</sub> and concentrated. Column chromatography (EtOAc/pentanes, 3:7 → 4:6) gave trisaccharide **18** (435 mg, 90%) as a white/pale yellow amorphous solid. <sup>1</sup>H NMR (600 MHz, Chloroform-*d*) δ<sub>H</sub> 8.01 (dd,  $J = 8.4, 1.2$  Hz, 2H, 2 × Bz), 7.92 (dt,  $J = 8.4, 1.3$  Hz, 4H, 4 × Bz), 7.85 – 7.78 (m, 6H, 6 × Bz), 7.74 – 7.67 (m, 2H, 2 × Phth), 7.66 – 7.63 (m, 2H, 2 × Phth), 7.58 (d,  $J = 9.4$  Hz, 1H, N-H), 7.55 – 7.41 (m, 6H, 6 × Bz), 7.38 – 7.29 (m, 8H, 8 × Bz), 7.19 – 7.13 (m, 2H, 2 × Bz), 7.09 (d,  $J = 8.8$  Hz, 1H, N-H'), 6.32 (dd,  $J = 10.7, 9.1$  Hz, 1H, H-3''), 5.97 (dd,  $J = 10.7, 9.5$  Hz, 1H, H-3), 5.65 (dd,  $J = 10.1, 9.2$  Hz, 1H, H-4''), 5.64 (dd,  $J = 10.5, 9.3$  Hz, 1H, H-3'), 5.53 (d,  $J = 8.4$  Hz, 1H, H-1''), 5.40 (t,  $J = 9.7$  Hz, 1H, H-4), 5.19 (t,  $J = 9.8$  Hz, 1H, H-4'), 4.85 (d,  $J = 8.4$  Hz, 1H, H-1), 4.67 (d,  $J = 8.4$  Hz, 1H, H-1'), 4.64 (dd,  $J = 10.8, 8.4$  Hz, 1H, H-2''), 4.37 (dd,  $J = 12.2, 6.0$  Hz, 1H, H-6a''), 4.32 – 4.23 (m, 3H, H-2, H-2', H-6b''), 4.17 – 4.10 (m, 2H, H-5, H-5''), 4.08 (dt,  $J = 10.0, 5.0$  Hz, 1H, OCHHCH<sub>2</sub>), 4.03 – 3.86 (m, 5H, H-5', H-6a, H-6a', COCH<sub>2</sub>Cl), 3.84 (dd,  $J = 12.5, 6.4$  Hz, 1H, H-6b), 3.79 (dd,  $J = 12.2, 2.1$  Hz, 1H, H-6b'), 3.70 (ddd,  $J = 13.0, 8.9, 4.2$  Hz, 1H, OCHHCH<sub>2</sub>), 3.62 (dd,  $J = 7.1, 5.4$  Hz, 2H, CH<sub>2</sub>CH<sub>2</sub>Cl), 2.11 (ddq,  $J = 13.7, 10.1, 5.1$  Hz, 1H, CH<sub>2</sub>CHHCH<sub>2</sub>), 1.96 (dddd,  $J = 14.6, 11.7, 7.0, 4.9$  Hz, 1H, CH<sub>2</sub>CHHCH<sub>2</sub>). <sup>13</sup>C NMR (125 MHz, Chloroform-*d*) δ<sub>C</sub> 167.92 (2 × COPht), 167.03 (COCH<sub>2</sub>Cl), 166.39, 166.36, 166.08, 165.60, 165.32, 165.15 (6 × CPh), 157.63 (d,  $J = 37.6$  Hz, 1 × COCF<sub>3</sub>), 157.41 (d,  $J = 37.6$  Hz, 1 × COCF<sub>3</sub>), 134.45 (2 × Phth), 133.94, 133.70, 133.63, 133.57, 133.54, 133.36 (6 × Bz), 131.25 (2 × 4° Phth), 130.06 (2 × Bz), 129.89 (2 × Bz), 129.85 (2 × Bz), 129.84 (2 × Bz), 129.81 (2 × Bz), 129.78 (2 × Bz), 128.77 (2 × Bz), 128.61 (1 × 4° Bz), 128.53 (2 × Bz), 128.50 (2 × Bz, 2 × 4° Bz), 128.49 (4 × Bz), 128.47 (2 × Bz), 128.42 (2 × Bz), 128.41, 128.36 (2 × 4° Bz), 128.24 (2 × Bz), 123.69 (2 × Phth), 115.68 (q,  $J = 288.2$  Hz, 1 × CF<sub>3</sub>), 115.62 (q,  $J = 288.2$  Hz, 1 × CF<sub>3</sub>), 101.62 (C-1'), 100.54 (C-1), 99.43 (C-1''), 73.81 (C-5'), 73.03 (C-5), 72.42 (C-5''), 72.38 (C-3'), 72.01 (C-3), 70.38 (C-3''), 70.23 (C-4), 70.16 (C-6'), 70.14 (C-6), 69.79 (C-4', C-4''), 66.31 (OCH<sub>2</sub>CH<sub>2</sub>), 64.01 (C-6''), 55.06 (C-2), 54.96 (C-2'), 54.94



(C-2''), 41.55 (CH<sub>2</sub>CH<sub>2</sub>Cl), 40.64 (COCH<sub>2</sub>Cl), 32.04 (CH<sub>2</sub>CH<sub>2</sub>CH<sub>2</sub>). *m/z* (ESI) calculated for C<sub>77</sub>H<sub>69</sub>N<sub>4</sub>O<sub>24</sub>F<sub>6</sub>Cl<sub>2</sub> [M+NH<sub>4</sub>]<sup>+</sup> 1617.36, found 1617.35.

**3,4-Di-O-benzoyl-2-phthalimido-2-deoxy-β-D-glucopyranosyl-(1→6)-3,4-di-O-benzoyl-2-trifluoroacetamido-2-deoxy-β-D-glucopyranosyl-(1→6)-chloropropyl 3,4-di-O-benzoyl-2-trifluoroacetamido-2-deoxy-β-D-glucopyranoside (19)**

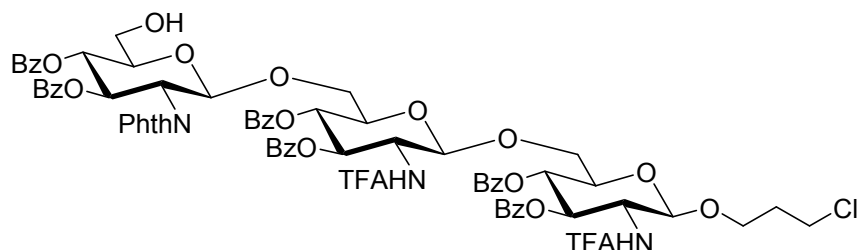

Trisaccharide **18** (424 mg, 0.265 mmol) and thiourea (101 mg, 1.33 mmol, 5 equiv) were dissolved in a 1:1 mixture of pyridine/EtOH (28 mL). The solution was stirred at 70 °C for 18 h (TLC in 4:6 EtOAc/pentanes, R<sub>f</sub> = 0.2), then co-concentrated with toluene. The residue was dissolved in CH<sub>2</sub>Cl<sub>2</sub> (70 mL) then washed with 1 M HCl (2 × 70 mL) then sat. aq. NaHCO<sub>3</sub> (70 mL). The aqueous layers were re-extracted with CH<sub>2</sub>Cl<sub>2</sub> (2 × 15 mL), and the organic layers were dried over Na<sub>2</sub>SO<sub>4</sub> and concentrated. Column chromatography (EtOAc/pentanes, 4:6) gave trisaccharide acceptor **19** (225 mg, 56%) as a white amorphous solid. <sup>1</sup>H NMR (600 MHz, Chloroform-*d*) δ<sub>H</sub> 7.96 (dd, *J* = 8.3, 1.1 Hz, 2H, 2 × Bz), 7.92 (dd, *J* = 8.4, 1.2 Hz, 2H, 2 × Bz), 7.87 (dd, *J* = 8.4, 1.2 Hz, 2H, 2 × Bz), 7.82 (dd, *J* = 8.4, 1.2 Hz, 2H, 2 × Bz), 7.76 (dd, *J* = 8.4, 1.2 Hz, 2H, 2 × Bz), 7.70 (dd, *J* = 5.5, 3.0 Hz, 2H, 2 × Phth), 7.66 (dd, *J* = 8.3, 1.2 Hz, 2H, 2 × Bz), 7.63 (dd, *J* = 5.5, 3.0 Hz, 2H, 2 × Phth), 7.58 (d, *J* = 9.0 Hz, 1H, N-H), 7.55 – 7.45 (m, 6H, 6 × Bz), 7.42 – 7.38 (m, 3H, 3 × Bz), 7.37 – 7.30 (m, 9H, 9 × Bz), 7.24 – 7.20 (m, 2H, 2 × Bz), 7.03 (d, *J* = 8.7 Hz, 1H, N-H'), 6.32 (dd, *J* = 10.7, 9.2 Hz, 1H, H-3''), 5.80 (dd, *J* = 10.7, 9.5 Hz, 1H, H-3), 5.58 (dd, *J* = 10.7, 9.4 Hz, 1H, H-3'), 5.55 (d, *J* = 8.4 Hz, 1H, H-1''), 5.43 – 5.32 (m, 3H, H-4, H-4', H-4''), 4.87 (d, *J* = 8.4 Hz, 1H, H-1), 4.67 (d, *J* = 8.4 Hz, 1H, H-1'), 4.53 (dd, *J* = 10.8, 8.4 Hz, 1H, H-2''), 4.26 – 4.17 (m, 2H, H-2, H-2'), 4.14 – 4.08 (m, 2H, H-5, H-6a'), 3.97 (dd, *J* = 11.0, 2.3 Hz, 1H, H-6a''), 3.93 – 3.89 (m, 2H, H-6a, OCHHCH<sub>2</sub>), 3.87 – 3.77 (m, 5H, H-5', H-5'', H-6b, H-6b', H-6b''), 3.69 – 3.64 (m, 3H, OCHHCH<sub>2</sub>, CH<sub>2</sub>Cl), 2.18 – 2.12 (m, 1H, CH<sub>2</sub>CHHCH<sub>2</sub>), 2.07 – 1.98 (m, 1H, CH<sub>2</sub>CHHCH<sub>2</sub>). <sup>13</sup>C NMR (125 MHz, Chloroform-*d*) δ<sub>C</sub> 166.46, 166.42, 166.40, 165.90, 165.64, 165.07 (6 × COPh), 157.60 (d, *J* = 37.5 Hz, 1 × COCF<sub>3</sub>), 157.39 (d, *J* = 37.7 Hz, 1 × COCF<sub>3</sub>), 134.14 (2 × Phth), 133.89, 133.79, 133.58, 133.51, 133.49, 133.34 (6 × Bz), 131.49 (2 × 4° Phth), 129.98 (2 × Bz), 129.96 (2 × Bz), 129.85 (2 × Bz), 129.78 (4 × Bz), 129.71 (2 × Bz), 128.68 (2 × Bz), 128.57 (1 × 4° Bz), 128.50 (2 × Bz), 128.49 (2 × 4° Bz), 128.45 (2 × Bz), 128.42 (2 × Bz, 1 × 4° Bz), 128.42 (1 × 4° Bz), 128.39 (2 × Bz, 1 × 4° Bz), 128.30 (2 × Bz), 123.53 (2 × Phth), 115.66 (q, *J* = 288.2 Hz, 1 × CF<sub>3</sub>), 115.58 (q, *J* = 288.3 Hz, 1 × CF<sub>3</sub>), 101.67 (C-1'), 100.56 (C-1), 98.28 (C-1''), 74.35 (C-5''), 73.36 (C-5, C-5'), 72.40 (C-3'), 72.20 (C-3), 70.44 (C-3''), 70.13 (C-4''), 70.03 (C-4), 70.01 (C-6), 69.27 (C-4'), 68.36 (C-6''), 66.46 (C-6), 61.06 (OCH<sub>2</sub>CH<sub>2</sub>), 55.20 (C-2), 54.93 (C-2'), 54.76 (C-2''), 41.58 (CH<sub>2</sub>Cl), 32.12 (CH<sub>2</sub>CH<sub>2</sub>CH<sub>2</sub>). *m/z* (ESI) calculated for C<sub>75</sub>H<sub>68</sub>N<sub>4</sub>O<sub>23</sub>F<sub>6</sub>Cl [M+NH<sub>4</sub>]<sup>+</sup> 1541.39, found 1541.38.

**3,4-Di-O-benzoyl-6-chloroacetyl-2-trifluoroacetamido-2-deoxy-β-D-glucopyranosyl-(1→6)-3,4-di-O-benzoyl-2-trifluoroacetamido-2-deoxy-β-D-glucopyranosyl-(1→6)-3,4-di-O-**

**benzoyl-2-phthalimido-2-deoxy- $\beta$ -D-glucopyranosyl-(1 $\rightarrow$ 6)-3,4-di-O-benzoyl-2-trifluoroacetamido-2-deoxy- $\beta$ -D-glucopyranosyl-(1 $\rightarrow$ 6)-chloropropyl 3,4-di-O-benzoyl-2-trifluoroacetamido-2-deoxy- $\beta$ -D-glucopyranoside (20)**

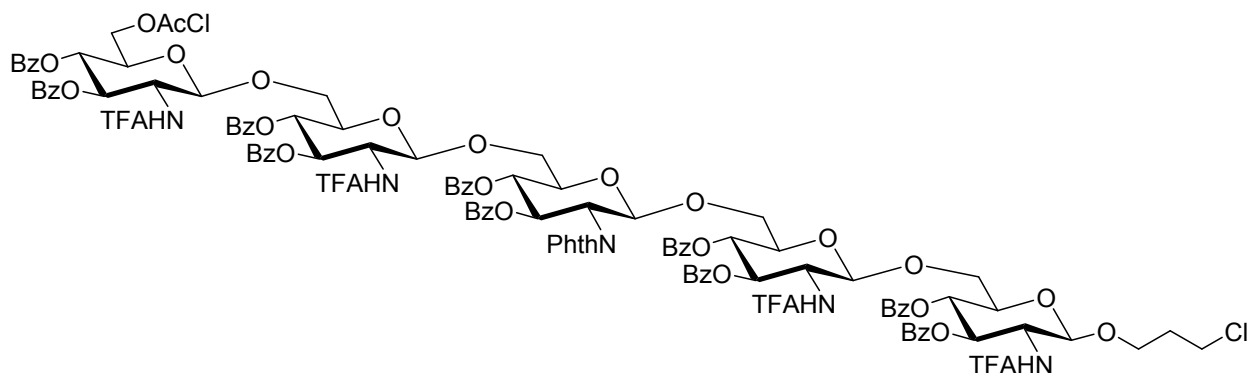

Trisaccharide acceptor **19** (165 mg, 0.108 mmol) and glycosyl bromide **13** (236 mg, 0.217 mmol, 2 equiv; 237 mg crude) were dissolved in freshly distilled  $\text{CH}_2\text{Cl}_2$  (3 mL) containing freshly activated powdered 4Å MS (300 mg). The mixture was cooled to  $-45\text{ }^\circ\text{C}$  under Ar in the dark for 1 h.  $\text{AgOTf}$  (75 mg, 0.292 mmol, 2.7 equiv.) in dry toluene (0.6 mL) was added, and the reaction was stirred for 2 h (TLC in 4:6 EtOAc/pentanes,  $R_f = 0.4$ ), then quenched with  $\text{NEt}_3$ . The mixture was diluted with  $\text{CH}_2\text{Cl}_2$  (7 mL) and filtered through celite. The solids were washed with  $\text{CH}_2\text{Cl}_2$  ( $3 \times 7$  mL). The filtrate was washed with sat. aq. NaCl ( $2 \times 25$  mL). The aqueous layers were re-extracted with  $\text{CH}_2\text{Cl}_2$  ( $2 \times 5$  mL). The organic layers were dried over  $\text{Na}_2\text{SO}_4$  and concentrated. Column chromatography (EtOAc/hexanes, 3:7  $\rightarrow$  4:6) gave pentasaccharide **20** (216 mg, 79%) as a white amorphous solid.  $^1\text{H}$  NMR (600 MHz, Chloroform-*d*)  $\delta_{\text{H}}$  8.41 (d,  $J = 6.9$  Hz, 1H, 1  $\times$  N-H), 8.37 (d,  $J = 9.7$  Hz, 1H, 1  $\times$  N-H), 8.11 – 7.95 (m, 19H, 1  $\times$  N-H, 18  $\times$  Bz), 7.94 – 7.91 (m, 2H, 2  $\times$  Bz), 7.70 (d,  $J = 7.6$  Hz, 1H, 1  $\times$  Phth), 7.65 (t,  $J = 7.3$  Hz, 1H, 1  $\times$  Phth), 7.63 – 7.60 (m, 2H, 2  $\times$  Bz), 7.58 – 7.37 (m, 17H, 16  $\times$  Bz, 1  $\times$  Phth), 7.36 – 7.30 (m, 6H, 6  $\times$  Bz), 7.20 (td,  $J = 7.6, 1.7$  Hz, 2H, 2  $\times$  Bz), 7.17 (td,  $J = 7.6, 1.6$  Hz, 2H, 2  $\times$  Bz), 7.13 – 7.10 (m, 3H, 2  $\times$  Bz, 1  $\times$  Phth), 6.90 (d,  $J = 8.1$  Hz, 1H, 1  $\times$  N-H), 6.55 (dd,  $J = 11.1, 9.0$  Hz, 1H, H-3"), 6.32 (dd,  $J = 10.5, 9.1$  Hz, 1H, 1  $\times$  H-3), 6.04 (dd,  $J = 10.7, 9.7$  Hz, 1H, 1  $\times$  H-3), 5.90 (dd,  $J = 10.6, 10.1$  Hz, 1H, 1  $\times$  H-3), 5.77 – 5.67 (m, 3H, 1  $\times$  H-3, H-4", 1  $\times$  H-4), 5.55 (dd,  $J = 10.1, 9.1$  Hz, 1H, 1  $\times$  H-4), 5.39 – 5.34 (m, 2H, 1  $\times$  H-1, 1  $\times$  H-4), 5.29 (d,  $J = 8.5$  Hz, 1H, H-1"), 5.10 (t,  $J = 9.8$  Hz, 1H, 1  $\times$  H-4), 4.97 (d,  $J = 8.5$  Hz, 1H, 1  $\times$  H-1), 4.91 (d,  $J = 8.4$  Hz, 1H, 1  $\times$  H-1), 4.83 (dd,  $J = 11.1, 8.5$  Hz, 1H, H-2"), 4.79 – 4.72 (m, 3H, H-5", 2  $\times$  H-5), 4.69 – 4.62 (m, 3H, 1  $\times$  H-1, 2  $\times$  H-2), 4.57 (q,  $J = 9.0$  Hz, 1H, 1  $\times$  H-2), 4.31 (dd,  $J = 12.2, 2.3$  Hz, 1H, 1  $\times$  H-6a), 4.25 (dd,  $J = 12.9, 11.0$  Hz, 1H, 1  $\times$  H-6a), 4.21 (dd,  $J = 9.7, 2.0$  Hz, 1H, 1  $\times$  H-5), 4.17 (dd,  $J = 12.3, 5.9$  Hz, 1H, 1  $\times$  H-6b), 4.13 – 4.09 (m, 3H, H-6a", 1  $\times$  H-6a, OCHHCH<sub>2</sub>), 3.96 (ddd,  $J = 10.1, 5.8, 2.4$  Hz, 1H, 1  $\times$  H-5), 3.92 (dd,  $J = 7.2, 2.2$  Hz, 1H, 1  $\times$  H-2), 3.87 (dd,  $J = 12.9, 9.6$  Hz, 1H, 1  $\times$  H-6a), 3.81 (d,  $J = 15.4$  Hz, 1H, COCHHCl), 3.69 (td,  $J = 10.1, 3.9$  Hz, 1H, OCHHCH<sub>2</sub>), 3.65 – 3.55 (m, 6H, H-6b", 2  $\times$  H-6b, CH<sub>2</sub>CH<sub>2</sub>Cl, COCHHCl), 3.47 – 3.43 (m, 1H, 1  $\times$  H-6b), 2.15 – 2.09 (m, 1H, CH<sub>2</sub>CHHCH<sub>2</sub>), 1.96 – 1.88 (m, 1H, CH<sub>2</sub>CHHCH<sub>2</sub>).  $^{13}\text{C}$  NMR (125 MHz, Chloroform-*d*)  $\delta_{\text{C}}$  169.18, 167.98 (2  $\times$  COPht), 167.28 (COCH<sub>2</sub>Cl), 166.84, 166.82, 166.59, 166.54, 166.46, 165.72, 165.57, 165.36, 165.15, 164.94 (10  $\times$  CPh), 158.38 (d,  $J = 38.5$  Hz, 1  $\times$  COCF<sub>3</sub>), 158.02 (d,  $J = 37.7$  Hz, 1  $\times$  COCF<sub>3</sub>), 157.96 (d,  $J = 37.6$  Hz, 1  $\times$  COCF<sub>3</sub>), 157.59 (d,  $J = 37.6$  Hz, 1  $\times$  COCF<sub>3</sub>), 134.92 (2  $\times$  Phth), 133.91, 133.87, 133.83, 133.77, 133.73, 133.53, 133.40 (7  $\times$  Bz), 133.35 (2  $\times$  Bz), 133.20 (1  $\times$  Bz), 130.69, 130.48 (2  $\times$  4° Phth), 130.22

(2 × Bz), 130.21 (2 × Bz), 130.16 (2 × Bz), 130.07 (2 × Bz), 129.90 (6 × Bz), 129.83 (2 × Bz), 129.80 (2 × Bz), 129.70 (2 × Bz), 129.08 (2 × Bz), 129.05 (4° Bz), 128.93 (2 × Bz), 128.87, 128.86, 128.84, 128.84 (4 × 4° Bz), 128.69 (2 × Bz), 128.65 (1 × 4° Bz), 128.64 (2 × Bz), 128.62 (1 × 4° Bz), 128.57 (2 × Bz), 128.43 (1 × 4° Bz), 128.40 (2 × Bz), 128.38 (2 × Bz), 128.35 (2 × Bz), 128.30 (2 × Bz), 128.23 (2 × Bz), 128.22, 128.13 (2 × 4° Bz), 124.36, 123.48 (2 × Phth), 115.96 (q,  $J = 288.0$  Hz, 1 × CF<sub>3</sub>), 115.59 (q,  $J = 287.8$  Hz, 1 × CF<sub>3</sub>), 115.36 (q,  $J = 288.4$  Hz, 1 × CF<sub>3</sub>), 115.04 (q,  $J = 287.1$  Hz, 1 × CF<sub>3</sub>), 104.09, 101.65, 100.72 (3 × C-1), 100.50 (C-1''), 100.42 (1 × C-1), 74.65 (1 × C-5), 73.90, 73.55 (C-6'', 1 × C-6), 73.50 (C-5''), 72.59 (1 × C-6), 72.53 (1 × C-3, 1 × C-5), 72.51 (1 × C-5), 72.28 (2 × C-3, 1 × C-5, 1 × C-6), 71.74 (1 × C-4), 71.70 (C-4''), 71.56, 69.91 (2 × C-4), 69.87 (1 × C-3), 69.64 (1 × C-4), 69.43 (C-3''), 66.45 (OCH<sub>2</sub>CH<sub>2</sub>), 63.67 (1 × C-6), 58.01, 55.44 (2 × C-2), 55.29 (C-2''), 54.70, 54.43 (2 × C-2), 41.61 (CH<sub>2</sub>CH<sub>2</sub>Cl), 40.54 (COCH<sub>2</sub>Cl), 32.12 (CH<sub>2</sub>CH<sub>2</sub>CH<sub>2</sub>).  $m/z$  (MALDI) calculated for C<sub>121</sub>H<sub>101</sub>N<sub>5</sub>O<sub>38</sub>F<sub>12</sub>Cl<sub>2</sub>Na [M+Na]<sup>+</sup> 2552.52, found 2552.13.

**2-Acetamido-3,4,6-tri-O-acetyl-2-deoxy-β-D-glucopyranosyl-(1→6)-2-acetamido-3,4-di-O-acetyl-2-deoxy-β-D-glucopyranosyl-(1→6)-3,4-di-O-acetyl-2-phthalimido-2-deoxy-β-D-glucopyranosyl-(1→6)-2-acetamido-3,4-di-O-acetyl-2-deoxy-β-D-glucopyranosyl-(1→6)-chloropropyl 2-acetamido-3,4-di-O-acetyl-2-deoxy-β-D-glucopyranoside (21)**

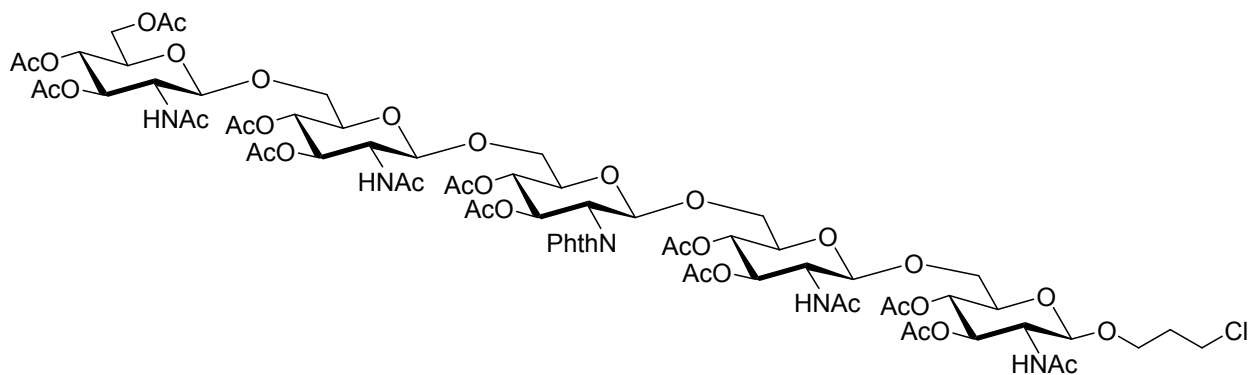

Pentasaccharide **20** (206 mg, 0.081 mmol) was dissolved in a 2:4:1 mixture of 0.5 M NaOH (16.2 mL, 8.1 mmol, 100 equiv.), THF (32.4 mL), and MeOH (8.1 mL). The reaction was stirred at 40 °C for 3 h. The solution was concentrated and dried under high vacuum. The residue was dissolved in a 1:1 mixture of pyridine (20 mL, 211.6 mmol, 2612 equiv.) and Ac<sub>2</sub>O (20 mL, 247.3 mmol, 3052 equiv.). The reaction was stirred at 50 °C for 2 h, then left to attain RT for 16 h (TLC in 17:3 EtOAc/EtOH, R<sub>f</sub> = 0.5). The solution co-concentrated with toluene. The residue was dissolved in CH<sub>2</sub>Cl<sub>2</sub> (60 mL) then washed with 1 M HCl (60 mL) then aq. NaHCO<sub>3</sub> (60 mL). The aqueous layers were re-extracted with CH<sub>2</sub>Cl<sub>2</sub> (2 × 15 mL). The organic layers were dried over Na<sub>2</sub>SO<sub>4</sub> and concentrated. Column chromatography (EtOAc/EtOH, 19:1 → 8:2) gave pentasaccharide **21** (101 mg, 75%) as a white amorphous solid. <sup>1</sup>H NMR (600 MHz, Acetone-*d*<sub>6</sub>) δ<sub>H</sub> 7.94 – 7.90 (m, 4H, 4 × Phth), 7.56 (d,  $J = 9.5$  Hz, 1H, 1 × N-H), 7.31 (d,  $J = 9.3$  Hz, 1H, 1 × N-H), 7.31 (d,  $J = 9.7$  Hz, 1H, 1 × N-H), 7.15 (d,  $J = 9.5$  Hz, 1H, 1 × N-H), 5.85 (dd,  $J = 10.7$ , 8.9 Hz, 1H, H-3''), 5.43 (d,  $J = 8.4$  Hz, 1H, H-1''), 5.35 (dd,  $J = 10.4$ , 9.4 Hz, 1H, 1 × H-3), 5.26 (dd,  $J = 10.4$ , 9.4 Hz, 1H, 1 × H-3), 5.22 – 5.17 (m, 3H, 1 × H-1, 2 × H-3), 5.04 (dd,  $J = 10.2$ , 8.9 Hz, 1H, H-4''), 4.98 (t,  $J = 10.4$  Hz, 1H, 1 × H-4), 4.92 (dd,  $J = 10.0$ , 9.4 Hz, 1H, 1 × H-4), 4.84 (t,  $J = 9.8$  Hz, 1H, 1 × H-4), 4.76 (d,  $J = 8.5$  Hz, 1H, 1 × H-1), 4.72 – 4.65 (m, 3H, 2 × H-1, 1 × H-4), 4.40 (td,  $J = 10.5$ , 9.7, 2.5 Hz, 1H, 1 × H-5), 4.31 (dd,  $J = 10.8$ , 8.4 Hz, 1H, H-2''), 4.28 –

4.20 (m, 2H, 1 × H-2, H-5"), 4.17 (q,  $J = 9.3$  Hz, 1H, 1 × H-2), 4.13 – 4.05 (m, 2H, 1 × H-5, 1 × H-6a), 4.03 – 3.97 (m, 4H, 2 × H-2, 1 × H-5, H-6a"), 3.95 – 3.85 (m, 5H, 1 × H-6a, H-6b"), 2 × H-6b, OCHHCH<sub>2</sub>), 3.84 – 3.80 (m, 2H, 1 × H-5, 1 × H-6a), 3.74 (dd,  $J = 11.7, 2.6$  Hz, 1H, 1 × H-6a), 3.68 (ddd,  $J = 12.4, 7.8, 4.6$  Hz, 1H, OCHHCH<sub>2</sub>), 3.67 – 3.62 (m, 3H, 1 × H-6b, CH<sub>2</sub>Cl), 3.59 (dd,  $J = 11.7, 8.2$  Hz, 1H, 1 × H-6b), 2.11, 2.09, 2.06, 2.05 (4 s, 12H, 4 × Ac), 2.03 – 2.01 (m, 1H, CH<sub>2</sub>CHHCH<sub>2</sub>), 1.99, 1.98, 1.96, 1.96, 1.95 (5 s, 15H, 5 × Ac), 1.96 – 1.93 (m, 4H, CH<sub>2</sub>CHHCH<sub>2</sub>, 1 × Ac), 1.92, 1.89, 1.84, 1.84, 1.83 (5 s, 15H, 5 × Ac). <sup>13</sup>C NMR (125 MHz, Acetone-*d*<sub>6</sub>) δ<sub>C</sub> 171.18, 170.93, 170.71 (3 × COCH<sub>3</sub>), 170.65 (2 × COCH<sub>3</sub>), 170.54 (2 × COCH<sub>3</sub>), 170.49, 170.45, 170.41, 170.33, 170.23, 170.12, 170.10, 170.06 (8 × COCH<sub>3</sub>), 135.88 (2 × Phth), 132.27 (2 × 4° Phth), 124.27 (2 × Phth), 103.99, 102.36, 101.85, 101.14 (4 × C-1), 100.04 (C-1"), 74.66 (1 × C-3), 74.54 (1 × C-5), 74.32, 73.87 (2 × C-3), 73.61 (C-5"), 73.22 (1 × C-5), 73.15 (1 × C-3), 72.69 (1 × C-5), 72.00 (1 × C-5, C-6"), 71.82 (1 × C-6), 71.57 (C-4"), 71.45 (1 × C-4), 71.26 (C-3"), 71.21 (1 × C-4), 70.90 (1 × C-6), 70.50, 69.96 (2 × C-4), 66.90 (OCH<sub>2</sub>CH<sub>2</sub>), 66.58, 63.03 (2 × C-6), 56.21 (C-2"), 54.97, 54.84, 54.70, 52.88 (4 × C-2), 42.63 (CH<sub>2</sub>Cl), 33.31 (CH<sub>2</sub>CH<sub>2</sub>CH<sub>2</sub>), 23.29, 23.25, 23.16, 23.09 (4 × NCOCH<sub>3</sub>), 21.05, 20.99, 20.98, 20.90, 20.73 (5 × OCOCH<sub>3</sub>), 20.71 (2 × OCOCH<sub>3</sub>), 20.67 (2 × OCOCH<sub>3</sub>), 20.55, 20.46 (2 × OCOCH<sub>3</sub>). *m/z* (ESI) calculated for C<sub>71</sub>H<sub>98</sub>N<sub>6</sub>O<sub>38</sub>Cl [M+NH<sub>4</sub>]<sup>+</sup> 1677.56, found 1677.56.

**2-Acetamido-3,4,6-tri-O-acetyl-2-deoxy-β-D-glucopyranosyl-(1→6)-2-acetamido-3,4-di-O-acetyl-2-deoxy-β-D-glucopyranosyl-(1→6)-3,4-di-O-acetyl-2-phthalimido-2-deoxy-β-D-glucopyranosyl-(1→6)-2-acetamido-3,4-di-O-acetyl-2-deoxy-β-D-glucopyranosyl-(1→6)-azidopropyl 2-acetamido-3,4-di-O-acetyl-2-deoxy-β-D-glucopyranoside (22)**

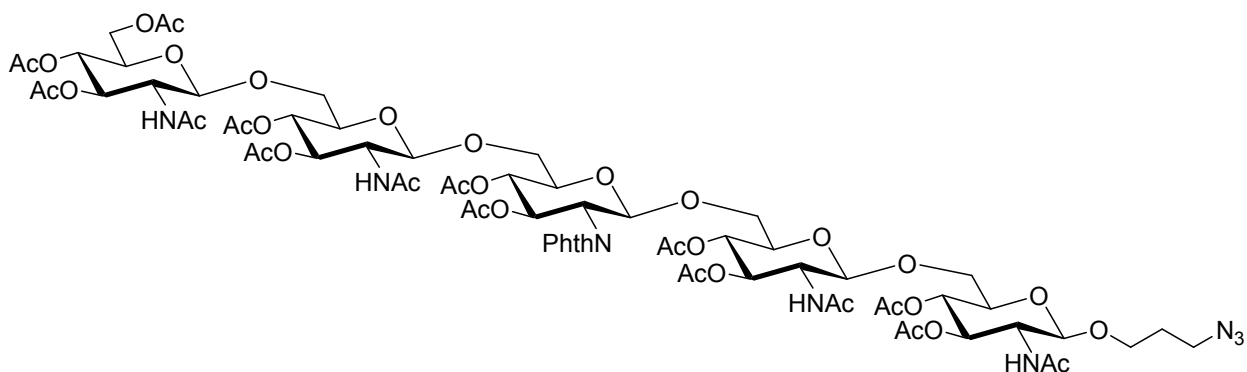

Pentasaccharide **21** (97.0 mg, 0.058 mmol) and NaN<sub>3</sub> (114 mg, 1.75 mmol, 30 equiv.) were dissolved in dry DMF (5.8 mL). The reaction was stirred at 80 °C for 24 h (TLC in 17:3 EtOAc/EtOH, R<sub>f</sub> = 0.5). The solution was diluted with EtOAc (90 mL) then washed with H<sub>2</sub>O (90 mL). The aqueous layer was re-extracted with EtOAc (2 × 45 mL). The organic layers were dried over Na<sub>2</sub>SO<sub>4</sub> and concentrated. Column chromatography (EtOAc/EtOH, 19:1 → 8:2) gave azidopropyl glycoside **22** (74.4 mg, 76%) as a white amorphous solid. <sup>1</sup>H NMR (600 MHz, Acetone-*d*<sub>6</sub>) δ<sub>H</sub> 7.99 – 7.88 (m, 4H, 4 × Phth), 7.54 (d,  $J = 9.4$  Hz, 1H, 1 × N-H), 7.31 (d,  $J = 9.4$  Hz, 2H, 2 × N-H), 7.14 (d,  $J = 9.5$  Hz, 1H, 1 × N-H), 5.85 (dd,  $J = 10.7, 8.9$  Hz, 1H, H-3"), 5.43 (d,  $J = 8.5$  Hz, 1H, H-1"), 5.34 (dd,  $J = 10.4, 9.4$  Hz, 1H, 1 × H-3), 5.26 (dd,  $J = 10.5, 9.4$  Hz, 1H, 1 × H-3), 5.22 – 5.18 (m, 3H, 1 × H-1, 2 × H-3), 5.05 (dd,  $J = 10.2, 8.9$  Hz, 1H, H-4"), 4.98 (t,  $J = 9.8$  Hz, 1H, 1 × H-4), 4.93 (dd,  $J = 10.0, 9.5$  Hz, 1H, 1 × H-4), 4.84 (t,  $J = 9.8$  Hz, 1H, 1 × H-4), 4.77 (d,  $J = 8.6$  Hz, 1H, 1 × H-1), 4.72 – 4.66 (m, 3H, 2 × H-1, 1 × H-4), 4.39 (td,  $J = 9.9, 2.3$  Hz, 1H, 1 × H-5), 4.31 (dd,  $J = 10.7, 8.5$  Hz, 1H, H-2"), 4.28 – 4.20 (m, 2H, 1 × H-2, H-5"),

4.17 (q,  $J = 9.4$  Hz, 1H, 1 × H-2), 4.11 (dd,  $J = 12.4, 5.6$  Hz, 1H, 1 × H-6a), 4.07 (ddd,  $J = 10.4, 8.2, 2.7$  Hz, 1H, 1 × H-5), 4.03 – 3.97 (m, 4H, 2 × H-2, 1 × H-5, H-6a"), 3.94 (dd,  $J = 10.4, 1.9$  Hz, 1H, 1 × H-6a), 3.91 – 3.85 (m, 4H, H-6b", 2 × H-6b, OCHHCH<sub>2</sub>), 3.84 – 3.79 (m, 2H, 1 × H-5, 1 × H-6a), 3.75 (dd,  $J = 11.7, 2.6$  Hz, 1H, 1 × H-6a), 3.65 (dd,  $J = 12.5, 9.7$  Hz, 1H, 1 × H-6b), 3.62 (ddd,  $J = 12.7, 7.3, 5.6$  Hz, 1H, OCHHCH<sub>2</sub>), 3.58 (dd,  $J = 11.8, 8.2$  Hz, 1H, 1 × H-6b), 3.40 (td,  $J = 6.8, 1.4$  Hz, 2H, CH<sub>2</sub>N<sub>3</sub>), 2.11, 2.09, 2.07, 2.05, 1.99, 1.98, 1.96 (7 s, 21H, 7 × CH<sub>3</sub>), 1.95 (s, 6H, 2 × CH<sub>3</sub>), 1.94, 1.92, 1.89, 1.84, 1.84, 1.83 (6 s, 18H, 6 × CH<sub>3</sub>), 1.83 – 1.79 (m, 2H, CH<sub>2</sub>CH<sub>2</sub>CH<sub>2</sub>). <sup>13</sup>C NMR (125 MHz, Acetone-*d*<sub>6</sub>) δ<sub>C</sub> 171.18, 170.94, 170.73, 170.67, 170.67 (5 × COCH<sub>3</sub>), 170.57 (2 × COCH<sub>3</sub>), 170.51, 170.48, 170.44, 170.33, 170.21, 170.15, 170.12, 170.00 (8 × COCH<sub>3</sub>), 135.91 (2 × Phth), 132.31 (2 × 4° Phth), 124.59, 124.33 (2 × Phth), 103.98, 102.36, 101.64, 101.18 (4 × C-1), 100.04 (C-1"), 74.67 (1 × C-3), 74.54 (1 × C-5), 74.38, 73.92 (2 × C-3), 73.64 (C-5"), 73.23 (1 × C-5), 73.20 (1 × C-3), 72.75 (1 × C-5), 72.05 (1 × C-5), 71.95 (C-6"), 71.76 (1 × C-6), 71.56 (C-4"), 71.46 (1 × C-4), 71.30 (C-3"), 71.22 (1 × C-4), 70.83 (1 × C-6), 70.52, 69.97 (2 × C-4), 66.90 (OCH<sub>2</sub>CH<sub>2</sub>), 66.62, 63.05 (2 × C-6), 56.22 (C-2"), 55.00, 54.84, 54.72, 52.91 (4 × C-2), 49.00 (CH<sub>2</sub>N<sub>3</sub>), 29.59 (CH<sub>2</sub>CH<sub>2</sub>CH<sub>2</sub>), 23.29, 23.26, 23.18, 23.09 (4 × NCOCH<sub>3</sub>), 21.06 (1 × OCOCH<sub>3</sub>), 20.99 (2 × OCOCH<sub>3</sub>), 20.90, 20.74 (2 × OCOCH<sub>3</sub>), 20.72 (2 × OCOCH<sub>3</sub>), 20.67 (2 × OCOCH<sub>3</sub>), 20.53, 20.46 (2 × OCOCH<sub>3</sub>). *m/z* (ESI) calculated for C<sub>71</sub>H<sub>98</sub>N<sub>9</sub>O<sub>38</sub> [M+NH<sub>4</sub>]<sup>+</sup> 1684.60, found 1684.60.

**3,4-Di-O-benzoyl-6-chloroacetyl-2-trifluoroacetamido-2-deoxy-β-D-glucopyranosyl-(1→6)-3,4-di-O-benzoyl-2-trifluoroacetamido-2-deoxy-β-D-glucopyranosyl-(1→6)-3,4-di-O-benzoyl-2-trifluoroacetamido-2-deoxy-β-D-glucopyranosyl-(1→6)-chloropropyl 3,4-di-O-benzoyl-2-trifluoroacetamido-2-deoxy-β-D-glucopyranoside (23)**

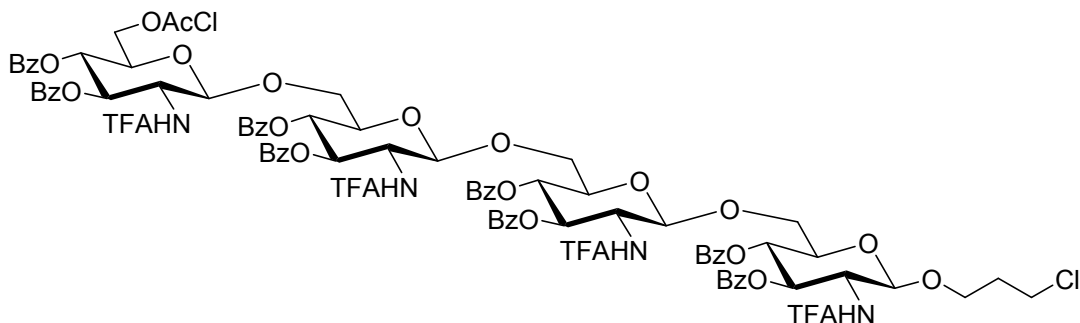

Disaccharide acceptor **15** (1.00 g, 0.98 mmol) and glycosyl bromide **13** (1.59 g, 1.46 mmol, 1.5 equiv; 1.77 g crude) were dissolved in freshly distilled CH<sub>2</sub>Cl<sub>2</sub> (25 mL) containing freshly activated powdered 4Å MS (2.5 g). The mixture was cooled to -45 °C under Ar in the dark for 1 h. AgOTf (0.50 mg, 1.95 mmol, 2 equiv.) in dry toluene (3 mL) was added, and the reaction was stirred under the same conditions for 2 h (TLC in 3:7 acetone/pentanes, R<sub>f</sub> = 0.2), then quenched with NEt<sub>3</sub>. The mixture was diluted with CH<sub>2</sub>Cl<sub>2</sub> (20 mL) and filtered through celite. The solids were washed with CH<sub>2</sub>Cl<sub>2</sub> (3 × 20 mL). The filtrate was washed with sat. aq. NaCl (2 × 80 mL). The aqueous layers were re-extracted with CH<sub>2</sub>Cl<sub>2</sub> (2 × 15 mL). The organic layers were dried over Na<sub>2</sub>SO<sub>4</sub> and concentrated. Column chromatography (acetone/pentanes, 3:7 → 7:13) gave tetrasaccharide **23** (1.52 g, 77%) as a pale yellow amorphous solid, and recovered acceptor **15** (0.11 g, 11%). **Analytical Data for 23:** <sup>1</sup>H NMR (600 MHz, Chloroform-*d*) δ<sub>H</sub> 8.12 (d,  $J = 7.7$  Hz, 1H, 1 × N-H), 8.05 (ddd,  $J = 10.4, 8.4, 1.3$  Hz, 4H, 4 × Bz), 8.02 – 7.98 (m, 2H, 2 × Bz), 7.99 – 7.93 (m, 9H, 1 × N-H, 8 × Bz), 7.60 – 7.44 (m, 10H, 1 × N-H, 9 × Bz), 7.45 – 7.28 (m,

14H, 1 × N-H, 13 × Bz), 7.25 (s, 2H, 2 × Bz), 7.15 – 7.11 (m, 2H, 2 × Bz), 5.95 (t,  $J = 9.9$  Hz, 1H, 1 × H-3), 5.92 (t,  $J = 10.3$  Hz, 1H, 1 × H-3), 5.84 (t,  $J = 9.6$  Hz, 1H, 1 × H-3), 5.79 (dd,  $J = 10.6, 9.0$  Hz, 1H, 1 × H-3), 5.70 (dd,  $J = 12.8, 6.8$  Hz, 1H, 1 × H-4), 5.65 (t,  $J = 9.6$  Hz, 1H, 1 × H-4), 5.35 (t,  $J = 9.7$  Hz, 1H, 1 × H-4), 5.20 (t,  $J = 9.8$  Hz, 1H, 1 × H-4), 4.99 (d,  $J = 8.4$  Hz, 1H, 1 × H-1), 4.82 (d,  $J = 8.2$  Hz, 1H, 1 × H-1), 4.77 (d,  $J = 8.4$  Hz, 1H, 1 × H-1), 4.70 – 4.47 (m, 7H, 1 × H-1, 4 × H-2, 1 × H-5), 4.42 (dd,  $J = 12.3, 6.8$  Hz, 1H, 1 × H-6a), 4.18 – 4.05 (m, 5H, 1 × H-5, 2 × H-6a, 1 × H-6b, OCHHCH<sub>2</sub>), 3.99 – 3.83 (m, 5H, 1 × H-5, 1 × H-6a, 1 × H-6b, COCH<sub>2</sub>Cl), 3.82 – 3.77 (m, 1H, OCHHCH<sub>2</sub>), 3.66 – 3.48 (m, 4H, 2 × H-6b, CH<sub>2</sub>CH<sub>2</sub>Cl), 2.04 (dt,  $J = 20.1, 6.2$  Hz, 2H, CH<sub>2</sub>CH<sub>2</sub>CH<sub>2</sub>). <sup>13</sup>C NMR (125 MHz, Chloroform-*d*) δ<sub>C</sub> 167.02 (COCH<sub>2</sub>Cl), 166.81, 166.70, 166.52, 166.48, 166.41, 166.29, 165.21, 165.08 (8 × C<sub>6</sub>H<sub>5</sub>), 158.33 (d,  $J = 38.0$  Hz, 1 × COCF<sub>3</sub>), 158.31 (d,  $J = 38.5$  Hz, 1 × COCF<sub>3</sub>), 158.17 (d,  $J = 37.8$  Hz, 1 × COCF<sub>3</sub>), 157.91 (d,  $J = 37.3$  Hz, 1 × COCF<sub>3</sub>), 133.98 (1 × Bz), 133.84 (2 × Bz), 133.75, 133.69 (2 × Bz), 133.43 (2 × Bz), 133.38 (1 × Bz), 130.14 (2 × Bz), 130.08 (2 × Bz), 130.00 (2 × Bz), 129.92 (2 × Bz), 129.85 (6 × Bz), 129.69 (2 × Bz), 128.89 (2 × Bz), 128.81 (2 × 4° Bz), 128.72 (2 × Bz), 128.68 (4 × 4° Bz), 128.64 (2 × Bz), 128.41 (4 × Bz), 128.38 (4 × Bz), 128.35 (2 × Bz), 128.19, 128.05 (2 × 4° Bz), 115.56 (q,  $J = 287.9$  Hz, 2 × CF<sub>3</sub>), 115.40 (q,  $J = 287.2$  Hz, 1 × CF<sub>3</sub>), 115.16 (q,  $J = 287.2$  Hz, 1 × CF<sub>3</sub>), 103.78, 103.31, 101.77, 99.96 (4 × C-1), 73.93, 73.30 (2 × C-5), 73.24 (1 × C-6), 73.01 (1 × C-5), 72.61, 72.45 (2 × C-3), 72.22 (1 × C-6), 71.77 (1 × C-3), 71.37, 71.33, 71.21, 70.23 (4 × C-4), 68.81 (1 × C-3), 66.53 (OCH<sub>2</sub>CH<sub>2</sub>), 64.17 (1 × C-6), 55.35, 55.16, 54.52, 53.76 (4 × C-2), 41.47 (CH<sub>2</sub>CH<sub>2</sub>Cl), 40.69 (COCH<sub>2</sub>Cl), 31.95 (CH<sub>2</sub>CH<sub>2</sub>CH<sub>2</sub>). *m/z* (ESI) calculated for C<sub>93</sub>H<sub>84</sub>N<sub>5</sub>O<sub>30</sub>F<sub>12</sub>Cl<sub>2</sub> [M+NH<sub>4</sub>]<sup>+</sup> 2048.44, found 2048.43.

**3,4-Di-O-benzoyl-2-trifluoroacetamido-2-deoxy-β-D-glucopyranosyl-(1→6)-3,4-di-O-benzoyl-2-trifluoroacetamido-2-deoxy-β-D-glucopyranosyl-(1→6)-3,4-di-O-benzoyl-2-trifluoroacetamido-2-deoxy-β-D-glucopyranosyl-(1→6)-chloropropyl 3,4-di-O-benzoyl-2-trifluoroacetamido-2-deoxy-β-D-glucopyranoside (24)**

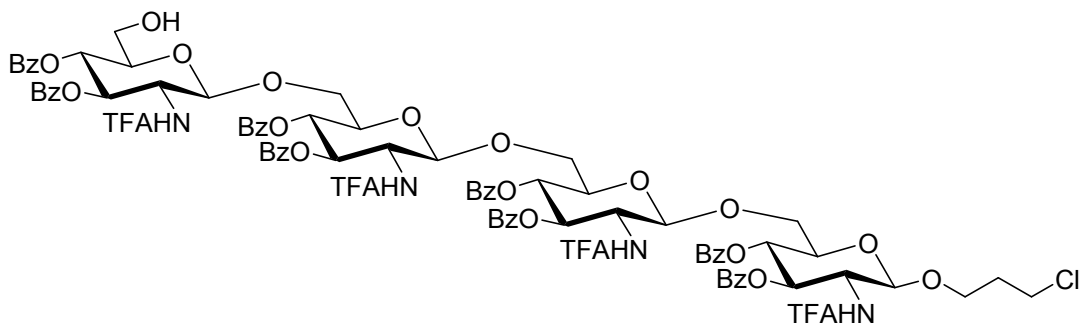

Tetrasaccharide **23** (1.22 g, 0.60 mmol) and thiourea (230 mg, 3.02 mmol, 5 equiv) were dissolved in a 1:1 mixture pyridine/EtOH (60 mL). The solution was stirred at 70 °C for 18 h (TLC in 1:1 EtOAc/pentanes,  $R_f = 0.6$ ), then co-concentrated with toluene. The residue was dissolved in CH<sub>2</sub>Cl<sub>2</sub> (150 mL) then washed with 1 M HCl (2 × 150 mL) then sat. aq. NaHCO<sub>3</sub> (150 mL). The aqueous layers were re-extracted with CH<sub>2</sub>Cl<sub>2</sub> (2 × 30 mL), and the organic layers were dried over Na<sub>2</sub>SO<sub>4</sub> and concentrated. Column chromatography (EtOAc/pentanes, 4:6 → 9:11) gave tetrasaccharide acceptor **24** (0.72 g, 62%) as a white/pale yellow amorphous solid. <sup>1</sup>H NMR (600 MHz, Chloroform-*d*) δ<sub>H</sub> 8.04 (d,  $J = 7.3$  Hz, 2H, 2 × Bz), 8.00 – 7.88 (m, 16H, 2 × N-H, 14 × Bz), 7.53 (q,  $J = 7.0$  Hz, 3H, 2 × Bz), 7.50 – 7.40 (m, 7H, 7 × Bz), 7.41 – 7.34 (m, 7H, 1 × N-H, 6 × Bz), 7.33 – 7.26 (m, 7H, 1 × N-H, 6 × Bz), 7.20 (t,  $J = 7.9$  Hz, 2H, 2 × Bz), 5.94 (t,  $J$

= 10.2 Hz, 1H, 1 × H-3), 5.88 (t,  $J = 10.2$  Hz, 1H, 1 × H-3), 5.81 – 5.71 (m, 2H, 2 × H-3), 5.67 (t,  $J = 9.5$  Hz, 1H, 1 × H-4), 5.53 (t,  $J = 9.4$  Hz, 1H, 1 × H-4), 5.40 (t,  $J = 9.7$  Hz, 1H, 1 × H-4), 5.26 (t,  $J = 9.7$  Hz, 1H, 1 × H-4), 4.95 (d,  $J = 8.2$  Hz, 1H, 1 × H-1), 4.83 (d,  $J = 8.2$  Hz, 1H, 1 × H-1), 4.75 (d,  $J = 8.3$  Hz, 1H, 1 × H-1), 4.64 – 4.55 (m, 3H, 1 × H-1, 2 × H-2), 4.51 (t,  $J = 9.7$  Hz, 1H, 1 × H-5), 4.46 (q,  $J = 9.7$  Hz, 1H, 1 × H-2), 4.42 – 4.33 (m, 2H, 1 × H-2, 1 × H-5), 4.24 – 4.19 (m, 1H, 1 × H-5), 4.12 – 3.98 (m, 3H, 2 × H-6a, OCHHCH<sub>2</sub>), 3.89 – 3.82 (m, 2H, 1 × H-6a, 1 × H-6b), 3.79 – 3.68 (m, 4H, 1 × H-6a, 2 × H-6b, OCHHCH<sub>2</sub>), 3.67 – 3.63 (m, 1H, 1 × H-5), 3.60 (dd,  $J = 12.7, 4.0$  Hz, 1H, 1 × H-6b), 3.55 (t,  $J = 7.0$  Hz, 2H, CH<sub>2</sub>Cl), 2.11 – 2.01 (m, 1H, CH<sub>2</sub>CHHCH<sub>2</sub>), 2.02 – 1.93 (m, 1H, CH<sub>2</sub>CHHCH<sub>2</sub>). <sup>13</sup>C NMR (125 MHz, Chloroform-*d*) δ<sub>C</sub> 166.94, 166.66, 166.53, 166.30 (4 × C<sub>OPh</sub>), 166.20 (2 × C<sub>OPh</sub>), 166.16, 165.33 (2 × C<sub>OPh</sub>), 158.17 (d,  $J = 38.1$  Hz, 1 × COCF<sub>3</sub>), 158.15 (d,  $J = 38.2$  Hz, 1 × COCF<sub>3</sub>), 158.10 (d,  $J = 37.7$  Hz, 1 × COCF<sub>3</sub>), 157.87 (d,  $J = 37.7$  Hz, 1 × COCF<sub>3</sub>), 134.04, 133.86, 133.82, 133.80, 133.71, 133.56, 133.42, 133.41 (8 × Bz), 130.11 (2 × Bz), 130.00 (2 × Bz), 129.97 (2 × Bz), 129.91 (4 × Bz), 129.84 (2 × Bz), 129.80 (4 × Bz), 128.73 (2 × Bz), 128.70, 128.70 (2 × 4° Bz), 128.67 (4 × Bz), 128.65 (2 × 4° Bz), 128.63 (2 × Bz), 128.55 (2 × 4° Bz), 128.43 (2 × Bz), 128.41 (4 × Bz), 128.38 (2 × Bz), 128.24 (2 × 4° Bz), 115.61 (q,  $J = 288.0$  Hz, 1 × CF<sub>3</sub>), 115.54 (q,  $J = 287.8$  Hz, 1 × CF<sub>3</sub>), 115.41 (q,  $J = 287.5$  Hz, 1 × CF<sub>3</sub>), 115.26 (q,  $J = 287.6$  Hz, 1 × CF<sub>3</sub>), 103.15, 102.73, 101.70, 100.17 (4 × C-1), 75.05, 73.97, 73.22, 72.76 (4 × C-5), 72.39 (1 × C-3, 1 × C-6), 72.29, 72.00 (1 × C-3), 71.51 (1 × C-3, 1 × C-6), 71.21 (1 × C-4, 1 × C-6), 70.76, 69.76, 69.32 (3 × C-4), 66.64 (OCH<sub>2</sub>CH<sub>2</sub>), 61.27 (1 × C-6), 55.37, 55.36, 54.66, 54.64 (4 × C-2), 41.50 (CH<sub>2</sub>Cl), 32.02 (CH<sub>2</sub>CH<sub>2</sub>CH<sub>2</sub>). *m/z* (MALDI) calculated for C<sub>91</sub>H<sub>79</sub>N<sub>4</sub>O<sub>29</sub>F<sub>12</sub>NaCl [M+Na]<sup>+</sup> 1977.42, found 1977.65.

**3,4-Di-O-benzoyl-6-chloroacetyl-2-phthalimido-2-deoxy-β-D-glucopyranosyl-(1→6)-3,4-di-O-benzoyl-2-trifluoroacetamido-2-deoxy-β-D-glucopyranosyl-(1→6)-3,4-di-O-benzoyl-2-trifluoroacetamido-2-deoxy-β-D-glucopyranosyl-(1→6)-3,4-di-O-benzoyl-2-trifluoroacetamido-2-deoxy-β-D-glucopyranosyl-(1→6)-chloropropyl 3,4-di-O-benzoyl-2-trifluoroacetamido-2-deoxy-β-D-glucopyranoside (25)**

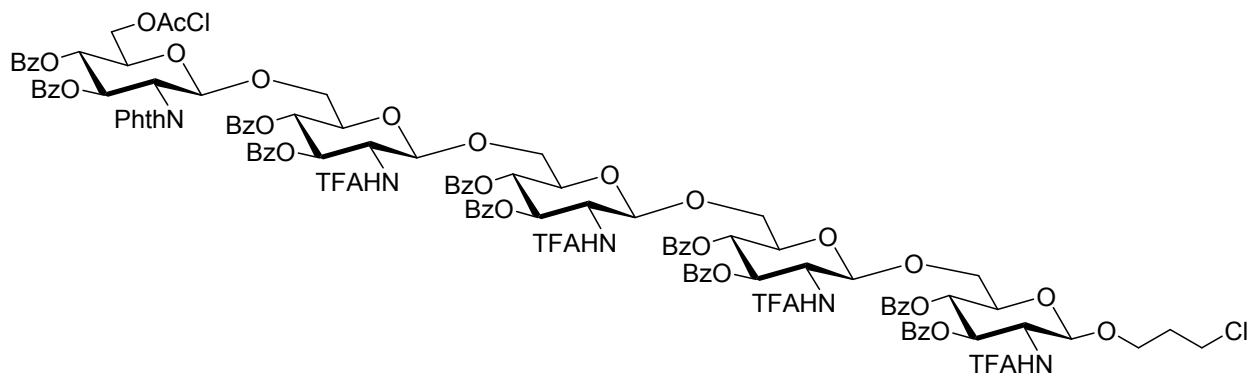

Tetrasaccharide acceptor **24** (0.59 g, 0.30 mmol) and glycosyl bromide **17** (0.59 g, 0.90 mmol, 3 equiv.) were dissolved in freshly distilled CH<sub>2</sub>Cl<sub>2</sub> (9 mL) containing freshly activated powdered 4Å MS (0.90 g). The mixture was cooled to -45 °C under Ar in the dark for 1 h. AgOTf (105 mg, 0.409 mmol, 4 equiv.) in dry toluene (0.6 mL) was added, and the reaction was stirred under the same conditions for 2 h (TLC in 4:6 EtOAc/pentanes, R<sub>f</sub> = 0.4), then quenched with NEt<sub>3</sub>. The mixture was diluted with CH<sub>2</sub>Cl<sub>2</sub> (25 mL) and filtered through celite. The solids were washed with CH<sub>2</sub>Cl<sub>2</sub> (3 × 25 mL). The filtrate was washed with sat. aq. NaCl (2 × 75 mL). The aqueous

layers were re-extracted with CH<sub>2</sub>Cl<sub>2</sub> (2 × 15 mL). The organic layers were dried over Na<sub>2</sub>SO<sub>4</sub> and concentrated. Column chromatography (EtOAc/pentanes, 7:13 → 9:11) gave pentasaccharide **25** (0.68 g, 89%) as a pale yellow amorphous solid. <sup>1</sup>H NMR (600 MHz, Chloroform-*d*) δ<sub>H</sub> 8.49 (d, *J* = 10.1 Hz, 1H, 1 × N-H), 8.44 (d, *J* = 9.5 Hz, 1H, 1 × N-H), 8.20 (d, *J* = 7.2 Hz, 2H, 2 × Bz), 8.16 – 8.11 (m, 2H, 2 × Bz), 8.08 – 8.03 (m, 3H, 1 × N-H, 2 × Bz), 8.03 (d, *J* = 7.3 Hz, 2H, 2 × Bz), 8.00 – 7.92 (m, 12H, 12 × Bz), 7.83 – 7.78 (m, 3H, 3 × Phth), 7.67 – 7.64 (m, 1H, 1 × Phth), 7.60 – 7.53 (m, 5H, 5 × Bz), 7.51 – 7.39 (m, 12H, 12 × Bz), 7.38 – 7.26 (m, 8H, 8 × Bz), 7.18 – 7.13 (m, 5H, 5 × Bz), 6.91 (d, *J* = 8.6 Hz, 1H, 1 × N-H), 6.34 (dd, *J* = 10.7, 8.9 Hz, 1H, H-3<sup>IV</sup>), 6.25 (dd, *J* = 10.9, 9.4 Hz, 1H, 1 × H-3), 6.01 (t, *J* = 10.3 Hz, 1H, 1 × H-3), 5.86 (t, *J* = 10.3 Hz, 1H, 1 × H-3), 5.76 – 5.63 (m, 4H, 1 × H-3, H-4<sup>IV</sup>, 2 × H-4), 5.33 (t, *J* = 9.8 Hz, 1H, 1 × H-4), 5.15 (d, *J* = 8.5 Hz, 1H, H-1<sup>IV</sup>), 5.07 (d, *J* = 8.5 Hz, 1H, 1 × H-1), 5.00 (t, *J* = 9.8 Hz, 1H, 1 × H-4), 4.92 (q, *J* = 10.2 Hz, 1H, 1 × H-2), 4.87 (d, *J* = 8.4 Hz, 1H, 1 × H-1), 4.80 – 4.67 (m, 3H, 1 × H-1, 2 × H-5), 4.66 – 4.55 (m, 6H, 1 × H-1, H-2<sup>IV</sup>, 3 × H-2, 1 × H-5), 4.37 (dd, *J* = 12.3, 7.3 Hz, 1H, H-6a<sup>IV</sup>), 4.25 (dd, *J* = 12.9, 10.8 Hz, 1H, 1 × H-6a), 4.21 – 4.09 (m, 3H, 1 × H-5, 1 × H-6a, OCHHCH<sub>2</sub>), 4.06 (dd, *J* = 12.2, 2.0 Hz, 1H, H-6b<sup>IV</sup>), 4.04 – 4.00 (m, 1H, H-5<sup>IV</sup>), 3.90 (d, *J* = 15.4 Hz, 1H, COCHHCl), 3.84 – 3.79 (m, 2H, OCHHCH<sub>2</sub>, COCHHCl), 3.75 (t, *J* = 13.3, 10.5 Hz, 1H, 1 × H-6b), 3.71 – 3.59 (m, 5H, 1 × H-6a, 2 × H-6b, CH<sub>2</sub>CH<sub>2</sub>Cl), 3.38 (dd, *J* = 13.0, 1.7 Hz, 1H, 1 × H-6a), 3.23 (d, *J* = 11.4 Hz, 1H, 1 × H-6b), 2.21 – 2.12 (m, 1H, CH<sub>2</sub>CHHCH<sub>2</sub>), 2.11 – 2.01 (m, 1H, CH<sub>2</sub>CHHCH<sub>2</sub>). <sup>13</sup>C NMR (125 MHz, Chloroform-*d*) δ<sub>C</sub> 168.80, 167.37 (2 × COPhth), 167.15 (COCH<sub>2</sub>Cl), 166.71, 166.60, 166.55, 166.53, 166.44, 166.17, 165.81, 165.65, 164.96, 164.94 (10 × CPh), 158.52 (d, *J* = 38.1 Hz, 1 × COCF<sub>3</sub>), 158.43 (d, *J* = 38.4 Hz, 1 × COCF<sub>3</sub>), 158.27 (d, *J* = 37.9 Hz, 1 × COCF<sub>3</sub>), 158.01 (d, *J* = 37.6 Hz, 1 × COCF<sub>3</sub>), 135.12, 135.00 (2 × Phth), 133.83 (2 × Bz), 133.78, 133.65 (2 × Bz), 133.54 (2 × Bz), 133.37 (3 × Bz), 133.20 (1 × Bz), 130.69, 130.50 (2 × 4° Phth), 130.22 (2 × Bz), 130.11 (2 × Bz), 129.94 (2 × Bz), 129.92 (4 × Bz), 129.90 (4 × Bz), 129.89 (2 × Bz), 129.69 (2 × Bz), 129.31 (2 × Bz), 129.30 (4° Bz), 128.98 (2 × Bz, 4° Bz), 128.80 (2 × 4° Bz), 128.73 (2 × Bz), 128.71 (2 × Bz), 128.69 (2 × Bz), 128.67 (1 × 4° Bz), 128.59 (2 × Bz), 128.56 (1 × 4° Bz), 128.37 (4 × Bz, 1 × 4° Bz), 128.32 (4 × Bz), 128.26 (1 × 4° Bz), 128.22 (2 × Bz), 128.19, 128.09 (2 × 4° Bz), 124.04, 123.68 (2 × Phth), 115.82 (q, *J* = 287.8 Hz, 1 × CF<sub>3</sub>), 115.70 (q, *J* = 287.1 Hz, 1 × CF<sub>3</sub>), 115.58 (q, *J* = 287.8 Hz, 1 × CF<sub>3</sub>), 115.01 (q, *J* = 287.0 Hz, 1 × CF<sub>3</sub>), 103.95, 103.34, 101.50 (3 × C-1), 100.94 (C-1<sup>IV</sup>), 100.14 (1 × C-1), 74.33 (1 × C-6), 74.00 (1 × C-5), 73.68 (1 × C-6), 73.62 (1 × C-5), 73.57 (1 × C-6), 73.09 (C-5<sup>IV</sup>), 72.75 (1 × C-3), 72.52 (1 × C-5), 72.37 (1 × C-6), 72.36 (1 × C-3), 72.17 (1 × C-5), 72.05 (1 × C-4), 71.98 (1 × C-3), 71.74, 71.54 (2 × C-4), 71.32 (1 × C-3), 70.22 (1 × C-4), 69.97 (C-4<sup>IV</sup>), 69.78 (C-3<sup>IV</sup>), 66.81 (OCH<sub>2</sub>CH<sub>2</sub>), 64.14 (C-6<sup>IV</sup>), 55.36, 55.28, 55.09 (3 × C-2), 54.65 (C-2<sup>IV</sup>), 54.42 (1 × C-2), 41.70 (CH<sub>2</sub>CH<sub>2</sub>Cl), 40.60 (COCH<sub>2</sub>Cl), 32.34 (CH<sub>2</sub>CH<sub>2</sub>CH<sub>2</sub>). *m/z* (MALDI) calculated for C<sub>121</sub>H<sub>101</sub>N<sub>5</sub>O<sub>38</sub>F<sub>12</sub>NaCl<sub>2</sub> [M+Na]<sup>+</sup> 2552.52, found 2552.41.

**3,4-Di-O-benzoyl-2-phthalimido-2-deoxy-β-D-glucopyranosyl-(1→6)-3,4-Di-O-benzoyl-2-trifluoroacetamido-2-deoxy-β-D-glucopyranosyl-(1→6)-3,4-di-O-benzoyl-2-trifluoroacetamido-2-deoxy-β-D-glucopyranosyl-(1→6)-3,4-di-O-benzoyl-2-trifluoroacetamido-2-deoxy-β-D-glucopyranosyl-(1→6)-chloropropyl 3,4-di-O-benzoyl-2-trifluoroacetamido-2-deoxy-β-D-glucopyranoside (26)**



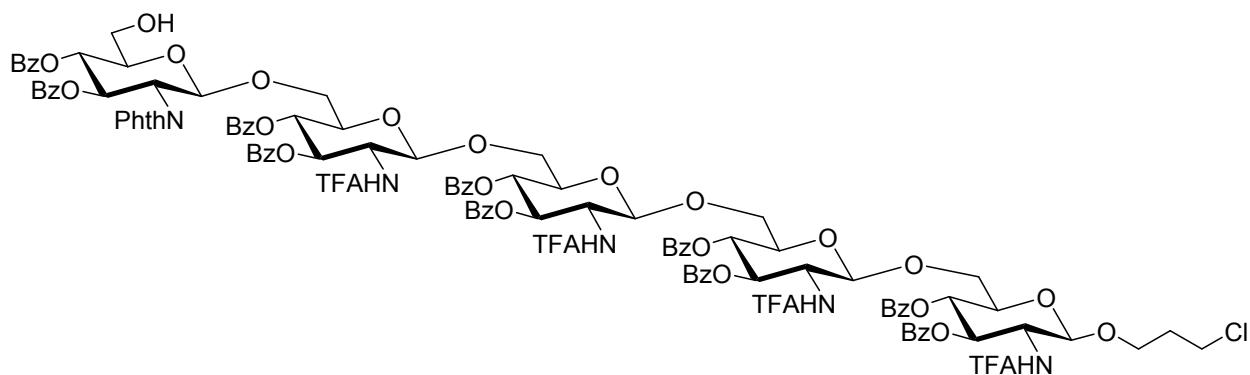

Pentasaccharide **25** (0.79 g, 0.31 mmol) and thiourea (120 mg, 1.58 mmol, 5 equiv) were dissolved in a 1:1 mixture pyridine/EtOH (30 mL). The solution was stirred at 70 °C for 18 h (TLC in 1:1 EtOAc/pentanes,  $R_f = 0.6$ ), then co-concentrated with toluene. The residue was dissolved in  $\text{CH}_2\text{Cl}_2$  (75 mL) then washed with 1 M HCl ( $2 \times 75$  mL) then sat. aq.  $\text{NaHCO}_3$  (75 mL). The aqueous layers were re-extracted with  $\text{CH}_2\text{Cl}_2$  ( $2 \times 15$  mL), and the organic layers were dried over  $\text{Na}_2\text{SO}_4$  and concentrated. Column chromatography (EtOAc/hexanes, 4:6  $\rightarrow$  1:1) gave pentasaccharide acceptor **26** (0.44 g, 57%) as a white/pale yellow amorphous solid.  $^1\text{H}$  NMR (600 MHz, Chloroform-*d*)  $\delta_{\text{H}}$  8.51 (d,  $J = 10.0$  Hz, 1H, 1  $\times$  N-H), 8.42 (d,  $J = 9.5$  Hz, 1H, 1  $\times$  N-H), 8.15 (dd,  $J = 8.1, 1.1$  Hz, 2H, 2  $\times$  Bz), 8.09 (dd,  $J = 8.4, 1.4$  Hz, 2H, 2  $\times$  Bz), 8.07 (d,  $J = 9.7$  Hz, 1H, 1  $\times$  N-H), 8.05 – 8.00 (m, 4H, 4  $\times$  Bz), 8.01 – 7.92 (m, 8H, 8  $\times$  Bz), 7.93 (dd,  $J = 8.1, 1.0$  Hz, 2H, 2  $\times$  Bz), 7.82 – 7.74 (m, 3H, 3  $\times$  Phth), 7.60 – 7.52 (m, 7H, 7  $\times$  Bz), 7.49 – 7.37 (m, 14H, 13  $\times$  Bz, 1  $\times$  Phth), 7.35 – 7.28 (m, 6H, 6  $\times$  Bz), 7.25 (t,  $J = 7.9$  Hz, 2H, 2  $\times$  Bz), 7.21 (t,  $J = 7.9$  Hz, 2H, 2  $\times$  Bz), 7.16 (t,  $J = 7.9$  Hz, 2H, 2  $\times$  Bz), 7.08 (d,  $J = 9.1$  Hz, 1H, 1  $\times$  N-H), 6.37 (dd,  $J = 10.6, 9.1$  Hz, 1H, H-3<sup>IV</sup>), 6.18 (dd,  $J = 10.7, 9.6$  Hz, 1H, 1  $\times$  H-3), 5.99 (t,  $J = 9.8$  Hz, 1H, 1  $\times$  H-3), 5.87 (t,  $J = 10.3$  Hz, 1H, 1  $\times$  H-3), 5.76 – 5.69 (m, 2H, 1  $\times$  H-3, 1  $\times$  H-4), 5.57 (dd,  $J = 10.7, 9.0$  Hz, 1H, 1  $\times$  H-4), 5.41 – 5.31 (m, 2H, H-4<sup>IV</sup>, 1  $\times$  H-4), 5.23 (d,  $J = 8.5$  Hz, 1H, H-1<sup>IV</sup>), 5.04 (d,  $J = 8.5$  Hz, 1H, 1  $\times$  H-1), 5.04 (t,  $J = 9.8$  Hz, 1H, 1  $\times$  H-4), 4.86 (q,  $J = 10.3$  Hz, 1H, 1  $\times$  H-2), 4.85 (d,  $J = 8.2$  Hz, 1H, 1  $\times$  H-1), 4.77 – 4.53 (m, 8H, 2  $\times$  H-1, 3  $\times$  H-2, 3  $\times$  H-5), 4.51 (dd,  $J = 10.6, 8.7$  Hz, 1H, H-2<sup>IV</sup>), 4.26 – 4.15 (m, 3H, 1  $\times$  H-5, 2  $\times$  H-6a), 4.13 – 4.03 (m, 2H, 1  $\times$  H-6a, OCHHCH<sub>2</sub>), 3.83 – 3.76 (m, 2H, H-5<sup>IV</sup>, OCHHCH<sub>2</sub>), 3.77 – 3.70 (m, 2H, H-6a<sup>IV</sup>, 1  $\times$  H-6a), 3.65 – 3.53 (m, 5H, H-6b<sup>IV</sup>, 2  $\times$  H-6b, CH<sub>2</sub>Cl), 3.41 (dd,  $J = 12.5, 1.3$  Hz, 1H, 1  $\times$  H-6b), 3.29 (dd,  $J = 11.9, 0.8$  Hz, 1H, 1  $\times$  H-6b), 2.14 – 2.09 (m, 1H, CH<sub>2</sub>CHHCH<sub>2</sub>), 2.06 – 1.99 (m, 1H, CH<sub>2</sub>CHHCH<sub>2</sub>).  $^{13}\text{C}$  NMR (125 MHz, Chloroform-*d*)  $\delta_{\text{C}}$  168.61, 167.53 (2  $\times$  COPht), 167.09, 166.59, 166.53, 166.52, 166.42, 166.25, 166.10, 165.73, 165.46, 164.89 (10  $\times$  COPh), 158.72 (d,  $J = 38.1$  Hz, 1  $\times$  COCF<sub>3</sub>), 158.41 (d,  $J = 38.7$  Hz, 1  $\times$  COCF<sub>3</sub>), 158.29 (d,  $J = 37.8$  Hz, 1  $\times$  COCF<sub>3</sub>), 158.01 (d,  $J = 37.6$  Hz, 1  $\times$  COCF<sub>3</sub>), 134.93 (2  $\times$  Phth), 133.87, 133.81, 133.76 (3  $\times$  Bz), 133.68 (2  $\times$  Bz), 133.52 (2  $\times$  Bz), 133.38, 133.28, 133.20 (3  $\times$  Bz), 130.84, 130.52 (2  $\times$  4° Phth), 130.17 (2  $\times$  Bz), 130.14 (2  $\times$  Bz), 130.09 (2  $\times$  Bz), 130.04 (2  $\times$  Bz), 129.99 (2  $\times$  Bz), 129.93 (2  $\times$  Bz), 129.91 (2  $\times$  Bz), 129.87 (2  $\times$  Bz), 129.81 (2  $\times$  Bz), 129.48 (2  $\times$  Bz), 129.01, 128.97 (2  $\times$  4° Bz), 128.94 (2  $\times$  Bz), 128.86 (2  $\times$  Bz), 128.79 (1  $\times$  4° Bz), 128.73 (2  $\times$  4° Bz), 128.72 (1  $\times$  4° Bz), 128.69 (2  $\times$  Bz), 128.62 (2  $\times$  Bz), 128.59 (2  $\times$  Bz, 1  $\times$  4° Bz), 128.42 (1  $\times$  4° Bz), 128.40 (2  $\times$  Bz), 128.39 (2  $\times$  Bz), 128.33 (2  $\times$  Bz, 1  $\times$  4° Bz), 128.32 (2  $\times$  Bz), 128.30 (2  $\times$  Bz), 128.11 (1  $\times$  4° Bz), 123.94, 123.48 (2  $\times$  Phth), 115.76 (q,  $J = 287.7$  Hz, 1  $\times$  CF<sub>3</sub>), 115.67 (q,  $J = 287.1$  Hz, 1  $\times$  CF<sub>3</sub>), 115.59 (q,  $J = 287.8$  Hz, 1  $\times$  CF<sub>3</sub>), 115.02 (q,  $J = 287.0$  Hz, 1  $\times$  CF<sub>3</sub>), 104.20, 103.43, 101.61, 100.11 (4  $\times$  C-1), 100.09 (C-1<sup>IV</sup>), 75.12 (C-5<sup>IV</sup>), 74.64 (1  $\times$  C-5), 74.25, 73.71 (2  $\times$  C-6), 73.64 (1  $\times$  C-5), 72.74 (1  $\times$  C-3), 72.67 (1  $\times$  C-5), 72.41 (1  $\times$  C-6), 72.37 (1  $\times$

C-3), 72.23 (1 × C-5), 71.89, 71.67 (2 × C-4), 71.62 (1 × C-4, 1 × C-6), 71.52, 71.50 (2 × C-3), 70.36 (C-4<sup>IV</sup>), 70.03 (C-3<sup>IV</sup>), 69.83 (1 × C-4), 66.73 (OCH<sub>2</sub>CH<sub>2</sub>), 61.63 (C-6<sup>IV</sup>), 55.22, 55.10 (2 × C-2), 55.03 (C-2<sup>IV</sup>), 54.56, 54.39 (2 × C-2), 41.66 (CH<sub>2</sub>Cl), 32.24 (CH<sub>2</sub>CH<sub>2</sub>CH<sub>2</sub>). *m/z* (MALDI) calculated for C<sub>119</sub>H<sub>100</sub>N<sub>5</sub>O<sub>37</sub>F<sub>12</sub>ClNa [M+Na]<sup>+</sup> 2476.55, found 2476.11.

**3,4-Di-O-benzoyl-6-chloroacetyl-2-phthalimido-2-deoxy-β-D-glucopyranosyl-(1→6)-3,4-di-O-benzoyl-2-trifluoroacetamido-2-deoxy-β-D-glucopyranosyl-(1→6)-3,4-di-O-benzoyl-2-phthalimido-2-deoxy-β-D-glucopyranosyl-(1→6)-3,4-Di-O-benzoyl-2-trifluoroacetamido-2-deoxy-β-D-glucopyranosyl-(1→6)-3,4-di-O-benzoyl-2-trifluoroacetamido-2-deoxy-β-D-glucopyranosyl-(1→6)-3,4-di-O-benzoyl-2-trifluoroacetamido-2-deoxy-β-D-glucopyranosyl-(1→6)-chloropropyl 3,4-di-O-benzoyl-2-trifluoroacetamido-2-deoxy-β-D-glucopyranoside (27)**

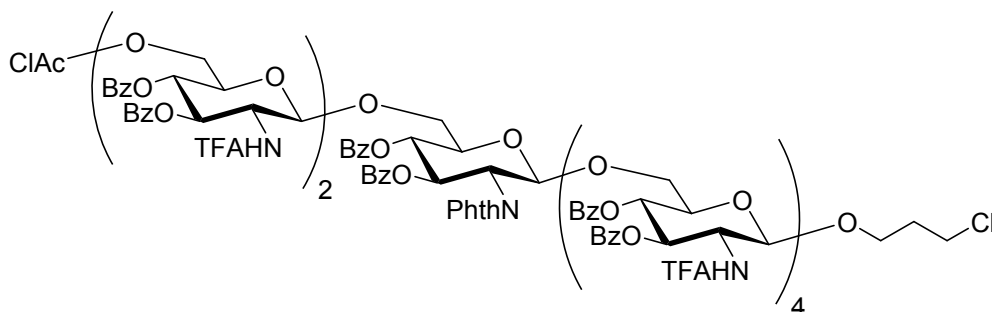

Pentasaccharide acceptor **26** (430 mg, 0.175 mmol) and glycosyl bromide **13** (381 mg, 0.350 mmol, 2 equiv; 388 mg crude) were dissolved in freshly distilled CH<sub>2</sub>Cl<sub>2</sub> (5.2 mL) containing freshly activated powdered 4Å MS (520 mg). The mixture was cooled to -45 °C under Ar in the dark for 1 h. AgOTf (121 mg, 0.471 mmol, 2.7 equiv.) in dry toluene (1.0 mL) was added, and the reaction was stirred under the same conditions for 2 h (TLC in 4:6 EtOAc/pentanes, R<sub>f</sub> = 0.3), then quenched with NEt<sub>3</sub>. The mixture was diluted with CH<sub>2</sub>Cl<sub>2</sub> (15 mL) and filtered through celite. The solids were washed with CH<sub>2</sub>Cl<sub>2</sub> (3 × 15 mL). The filtrate was washed with sat. aq. NaCl (2 × 45 mL). The aqueous layers were re-extracted with CH<sub>2</sub>Cl<sub>2</sub> (2 × 10 mL). The organic layers were dried over Na<sub>2</sub>SO<sub>4</sub> and concentrated. Column chromatography (acetone/hexanes, 7:13 → 9:11) gave a crude mixture containing heptasaccharide **27** and pentasaccharide acceptor **26**. The crude mixture was dissolved in CH<sub>2</sub>Cl<sub>2</sub> (1.8 mL). Pyridine (28.4 μL, 0.351 mmol) was added, followed by chloroacetyl chloride (13.7 μL, 0.176 mmol). The reaction was stirred at RT for 30 min. The solution was diluted with CH<sub>2</sub>Cl<sub>2</sub> (5 mL) then washed with 1 M HCl (2 × 5 mL) then sat. aq. NaHCO<sub>3</sub> (5 mL). The aqueous layers were re-extracted with CH<sub>2</sub>Cl<sub>2</sub> (2 × 1 mL). The organic layers were dried over Na<sub>2</sub>SO<sub>4</sub> and concentrated. Column chromatography (acetone/pentanes, 32:68 → 1:1) gave heptasaccharide **27** (284 mg, 47%) as a pale yellow amorphous solid, and chloroacetylated pentasaccharide **25** (68 mg, 15%) as a pale yellow amorphous solid. **Analytical Data for 27:** <sup>1</sup>H NMR (600 MHz, Chloroform-*d*) δ<sub>H</sub> 8.47 (d, *J* = 9.9 Hz, 1H, 1 × N-H), 8.32 (d, *J* = 7.0 Hz, 1H, 1 × N-H), 8.26 – 8.23 (m, 2H, 2 × Bz), 8.21 (d, *J* = 9.3 Hz, 1H, 1 × N-H), 8.18 – 8.12 (m, 5H, 1 × N-H, 4 × Bz), 8.10 – 8.08 (m, 2H, 2 × Bz), 8.06 – 8.00 (m, 6H, 6 × Bz), 7.97 (d, *J* = 9.4 Hz, 1H, 1 × N-H), 7.95 – 7.87 (m, 12H, 12 × Bz), 7.74 – 7.70 (m, 4H, 2 × Bz, 2 × Phth), 7.66 – 7.23 (m, 37H, 36 × Bz, 1 × Phth), 7.21 – 7.16 (m, 2H, 2 × Bz), 7.11 (t, *J* = 7.9 Hz, 2H, 2 × Bz), 7.03 (d, *J* = 9.6 Hz, 1H, 1 × N-H), 7.00 (t, *J* = 7.6 Hz, 3H, 2 × Bz, 1 × Phth), 6.51 (dd, *J* = 11.0, 9.1 Hz, 1H, H-3<sup>IV</sup>), 6.25 – 6.21 (m, 2H, 2 × H-3), 6.07 (t, *J* = 10.1 Hz, 1H, 1 × H-3), 5.99 (t, *J* = 10.1 Hz, 1H, 1 × H-3), 5.94 (t, *J* =

10.3 Hz, 1H, 1 × H-3), 5.68 – 5.64 (m, 1H, 1 × H-3), 5.61 (t,  $J = 9.7$  Hz, 1H, 1 × H-4), 5.53 (t,  $J = 9.8$  Hz, 1H, 1 × H-4), 5.48 – 5.38 (m, 4H, H-4<sup>IV</sup>, 3 × H-4), 5.33 (d,  $J = 8.3$  Hz, 1H, 1 × H-1), 5.15 (t,  $J = 9.8$  Hz, 1H, 1 × H-4), 5.07 (t,  $J = 8.7$  Hz, 2H, H-1<sup>IV</sup>, 1 × H-1), 4.93 – 4.80 (m, 4H, 2 × H-1, 1 × H-2, 1 × H-5), 4.79 – 4.67 (m, 5H, 1 × H-1, H-2<sup>IV</sup>, 1 × H-2, 2 × H-5), 4.64 – 4.52 (m, 5H, 1 × H-1, 3 × H-2, 1 × H-5), 4.30 – 4.24 (m, 2H, 2 × H-6a), 4.21 – 4.10 (m, 5H, H-5<sup>IV</sup>, H-6a<sup>IV</sup>, 1 × H-6a, 1 × H-6b, OCHHCH<sub>2</sub>), 3.98 (dd,  $J = 13.00, 11.25$  Hz, 1H, 1 × H-6a), 3.95 – 3.85 (m, 4H, 1 × H-2, 2 × H-5, 1 × H-6a), 3.83 – 3.73 (m, 3H, H-6b<sup>IV</sup>, OCHHCH<sub>2</sub>, COCHHCl), 3.69 – 3.60 (m, 3H, 1 × H-6a, CH<sub>2</sub>CH<sub>2</sub>Cl), 3.57 (d,  $J = 10.4$  Hz, 1H, 1 × H-6b), 3.53 (d,  $J = 15.4$  Hz, 1H, COCHHCl), 3.50 – 3.46 (m, 1H, 1 × H-6b), 3.44 – 3.37 (m, 2H, 2 × H-6b), 3.32 – 3.28 (m, 1H, 1 × H-6b), 2.14 – 2.07 (m, 1H, CH<sub>2</sub>CHHCH<sub>2</sub>), 2.05 – 1.98 (m, 1H, CH<sub>2</sub>CHHCH<sub>2</sub>). <sup>13</sup>C NMR (125 MHz, Chloroform-*d*)  $\delta_C$  168.64, 168.38 (2 × C<sup>O</sup>Phth), 167.25 (COCH<sub>2</sub>Cl), 166.85, 166.84, 166.53, 166.50, 166.38, 166.26, 166.18, 165.95, 165.85, 165.72, 165.60, 165.16, 165.04, 164.88 (14 × C<sup>O</sup>Ph), 158.75 (d,  $J = 38.2$  Hz, 1 × C<sup>O</sup>CF<sub>3</sub>), 158.52 (d,  $J = 37.7$  Hz, 1 × C<sup>O</sup>CF<sub>3</sub>), 158.48 (d,  $J = 38.4$  Hz, 1 × C<sup>O</sup>CF<sub>3</sub>), 158.11 (d,  $J = 37.7$  Hz, 1 × C<sup>O</sup>CF<sub>3</sub>), 158.06 (d,  $J = 37.8$  Hz, 1 × C<sup>O</sup>CF<sub>3</sub>), 157.60 (d,  $J = 37.4$  Hz, 1 × C<sup>O</sup>CF<sub>3</sub>), 135.11, 134.92 (2 × Phth), 133.99, 133.89, 133.87, 133.75, 133.63, 133.62, 133.56, 133.43, 133.28 (9 × Bz), 133.24 (2 × Bz), 133.15 (1 × Bz), 133.12 (2 × Bz), 130.56 (2 × Bz), 130.32 (2 × Bz), 130.31 (2 × Bz), 130.30 (2 × Bz), 130.19 (2 × Bz), 130.05 (2 × Bz), 129.96 (2 × Bz), 129.87 (4 × Bz), 129.84 (2 × Bz), 129.75 (2 × Bz), 129.70 (2 × Bz), 129.67 (2 × Bz), 129.59 (2 × Bz), 129.03 (1 × 4° Bz), 129.00 (2 × 4° Bz), 128.99 (2 × Bz), 128.96 (2 × Bz), 128.95, 128.91, 128.88, 128.78, 128.77 (5 × 4° Bz), 128.72 (2 × Bz), 128.70, 128.66 (2 × 4° Bz), 128.62 (2 × Bz), 128.58 (2 × 4° Bz), 128.57 (2 × Bz), 128.49 (2 × Bz), 128.44 (1 × 4° Bz), 128.40 (2 × Bz), 128.38 (2 × Bz), 128.35 (6 × Bz), 128.26 (4 × Bz), 128.23 (2 × Bz), 128.14 (1 × 4° Bz), 124.33, 123.52 (2 × Phth), 115.78 (q,  $J = 287.6$  Hz, 2 × CF<sub>3</sub>), 115.71 (q,  $J = 287.8$  Hz, 1 × CF<sub>3</sub>), 115.40 (q,  $J = 288.5$  Hz, 1 × CF<sub>3</sub>), 115.20 (q,  $J = 286.9$  Hz, 1 × CF<sub>3</sub>), 115.19 (q,  $J = 287.0$  Hz, 1 × CF<sub>3</sub>), 103.92, 103.26, 102.65, 101.38 (4 × C-1), 100.80 (C-1<sup>IV</sup>), 100.43, 100.20 (2 × C-1), 74.32 (C-5<sup>IV</sup>), 74.00, 73.67, 73.43, 72.97, 72.88, 72.75, 72.67, 72.49, 72.49, 72.47, 72.42, 72.34, 72.15, 72.09, 71.87, 71.48, 71.27, 70.88, 70.28 (C-4<sup>IV</sup>), 69.97, 69.54, 69.30 (C-3<sup>IV</sup>), 66.76 (OCH<sub>2</sub>CH<sub>2</sub>), 63.67 (C-6<sup>IV</sup>), 57.88, 55.44, 55.30 (3 × C-2), 55.18 (C-2<sup>IV</sup>), 55.08, 54.95, 54.83 (3 × C-2), 41.67 (CH<sub>2</sub>CH<sub>2</sub>Cl), 40.52 (COCH<sub>2</sub>Cl), 32.30 (CH<sub>2</sub>CH<sub>2</sub>CH<sub>2</sub>). *m/z* (MALDI) calculated for C<sub>165</sub>H<sub>137</sub>N<sub>7</sub>O<sub>52</sub>F<sub>18</sub>Cl<sub>2</sub>Na [M+Na]<sup>+</sup> 3482.73, found 3482.12.

**2-Acetamido-3,4,6-tri-O-acetyl-2-deoxy-β-D-glucopyranosyl-(1→6)-2-acetamido-3,4-di-O-acetyl-2-deoxy-β-D-glucopyranosyl-(1→6)-3,4-di-O-acetyl-2-phthalimido-2-deoxy-β-D-glucopyranosyl-(1→6)-2-acetamido-3,4-di-O-acetyl-2-deoxy-β-D-glucopyranosyl-(1→6)-2-acetamido-3,4-di-O-acetyl-2-deoxy-β-D-glucopyranosyl-(1→6)-2-acetamido-3,4-di-O-acetyl-2-deoxy-β-D-glucopyranosyl-(1→6)-chloropropyl 2-acetamido-3,4-di-O-acetyl-2-deoxy-β-D-glucopyranoside (28)**



**2-Acetamido-3,4,6-tri-O-acetyl-2-deoxy- $\beta$ -D-glucopyranosyl-(1 $\rightarrow$ 6)-2-acetamido-3,4-di-O-acetyl-2-deoxy- $\beta$ -D-glucopyranosyl-(1 $\rightarrow$ 6)-3,4-di-O-acetyl-2-phthalimido-2-deoxy- $\beta$ -D-glucopyranosyl-(1 $\rightarrow$ 6)-2-acetamido-3,4-di-O-acetyl-2-deoxy- $\beta$ -D-glucopyranosyl-(1 $\rightarrow$ 6)-2-acetamido-3,4-di-O-acetyl-2-deoxy- $\beta$ -D-glucopyranosyl-(1 $\rightarrow$ 6)-azidopropyl 2-acetamido-3,4-di-O-acetyl-2-deoxy- $\beta$ -D-glucopyranoside (**29**)**

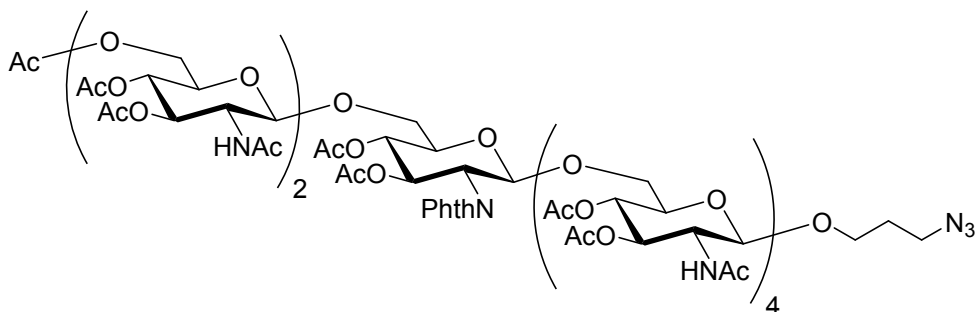

Heptasaccharide **28** (55.0 mg, 0.025 mmol) and NaN<sub>3</sub> (48.0 mg, 0.738 mmol, 30 equiv.) were dissolved in dry DMF (2.5 mL). The reaction was stirred at 80 °C for 45 h (TLC in 8:2 EtOAc/EtOH, R<sub>f</sub> = 0.3). The solution was diluted with EtOAc (40 mL) then washed with H<sub>2</sub>O (40 mL). The aqueous layer was re-extracted with EtOAc (5 × 20 mL). The organic layers were dried over Na<sub>2</sub>SO<sub>4</sub> and concentrated. Column chromatography (EtOAc/EtOH, 99:1 → 9:1) gave azidopropyl glycoside **29** (35.5 mg, 64%) as a white amorphous solid. <sup>1</sup>H NMR (600 MHz, Acetone-*d*<sub>6</sub>) δ<sub>H</sub> 8.11 (d, *J* = 10.1 Hz, 1H, 1 × N-H), 8.01 – 7.99 (m, 1H, 1 × Phth), 7.98 – 7.94 (m, 3H, 3 × Phth), 7.87 (d, *J* = 9.7 Hz, 1H, 1 × N-H), 7.83 (d, *J* = 9.8 Hz, 1H, 1 × N-H), 7.51 (d, *J* = 10.2 Hz, 1H, 1 × N-H), 7.46 (d, *J* = 9.5 Hz, 2H, 2 × N-H), 5.92 (dd, *J* = 10.7, 8.7 Hz, 1H, H-3<sup>IV</sup>), 5.46 – 5.42 (m, 2H, H-1<sup>IV</sup>, 1 × H-3), 5.41 – 5.33 (m, 3H, 3 × H-3), 5.27 – 5.17 (m, 3H, 1 × H-1, 2 × H-3), 5.13 (dd, *J* = 10.4, 9.0 Hz, 1H, 1 × H-4), 5.05 – 4.91 (m, 5H, H-4<sup>IV</sup>, 4 × H-4), 4.80 – 4.72 (m, 4H, 3 × H-1, 1 × H-5), 4.70 – 4.62 (m, 4H, 2 × H-1, 1 × H-4, 1 × H-5), 4.55 (td, *J* = 10.4, 3.1 Hz, 1H, 1 × H-5), 4.50 – 4.41 (m, 4H, H-2<sup>IV</sup>, 2 × H-2, H-5<sup>IV</sup>), 4.35 (dt, *J* = 10.3, 9.0 Hz, 1H, 1 × H-2), 4.25 (q, *J* = 9.6 Hz, 1H, 1 × H-2), 4.19 (dd, *J* = 12.5, 4.6 Hz, 1H, 1 × H-6a), 4.15 – 4.04 (m, 5H, 2 × H-2, 2 × H-5, H-6a<sup>IV</sup>), 4.02 – 3.93 (m, 3H, 2 × H-6a, 1 × H-6b), 3.89 – 3.81 (m, 5H, 1 × H-5, 1 × H-6a, H-6b<sup>IV</sup>, OCHHCH<sub>2</sub>, OCHHCH<sub>2</sub>), 3.78 – 3.67 (m, 4H, 2 × H-6a, 2 × H-6b), 3.58 – 3.52 (m, 2H, 2 × H-6b), 3.48 (dd, *J* = 12.8, 2.8 Hz, 1H, 1 × H-6b), 3.43 (t, *J* = 7.1 Hz, 2H, CH<sub>2</sub>N<sub>3</sub>), 2.20, 2.15, 2.11, 2.11, 2.11, 2.07, 2.03, 2.02, 1.98, 1.98, 1.97, 1.96, 1.95, 1.95 (14 s, 39H, 13 × Ac), 1.94 – 1.93 (m, 1H, CH<sub>2</sub>CHHCH<sub>2</sub>), 1.91, 1.89, 1.87 (3 s, 9H, 3 × Ac), 1.86 (s, 6H, 2 × Ac), 1.81 (s, 3H, 1 × Ac), 1.81 – 1.80 (m, 1H, CH<sub>2</sub>CHHCH<sub>2</sub>), 1.77 (s, 3H, 1 × Ac). <sup>13</sup>C NMR (125 MHz, Acetone-*d*<sub>6</sub>) δ<sub>C</sub> 171.61, 171.42, 171.19, 171.08, 170.98, 170.78, 170.71, 170.68, 170.67, 170.64, 170.62, 170.60, 170.54, 170.45 (14 × COCH<sub>3</sub>), 170.33 (2 × COCH<sub>3</sub>), 170.17, 170.08, 170.05, 169.84, 169.54 (5 × COCH<sub>3</sub>), 169.32, 169.04 (2 × COPhth), 136.31, 136.07 (2 × Phth), 132.17, 132.07 (2 × 4° Phth), 124.86, 124.22 (2 × Phth), 104.74, 104.32, 104.20, 103.04, 101.09, 100.73 (6 × C-1), 100.70 (C-1<sup>IV</sup>), 75.36, 75.14 (2 × C-3), 74.71 (1 × C-5), 73.88 (1 × C-3), 73.70 (C-5<sup>IV</sup>), 73.57 (1 × C-4), 73.45, 73.42 (2 × C-3), 73.40 (2 × C-5), 73.29 (C-6<sup>IV</sup>), 73.12, 73.00 (2 × C-6), 72.79 (1 × C-3), 72.42 (1 × C-6), 72.23 (1 × C-4, 1 × C-5), 72.21 (1 × C-5), 72.16, 71.98 (2 × C-4), 71.50 (1 × C-5), 71.11 (1 × C-4), 70.93 (C-3<sup>IV</sup>), 70.59 (C-4<sup>IV</sup>), 69.82 (1 × C-4), 66.69 (OCH<sub>2</sub>CH<sub>2</sub>), 65.44, 62.68 (2 × C-6), 56.62 (C-2<sup>IV</sup>), 55.77, 55.29, 55.23, 54.92, 54.74, 52.06 (6 × C-2), 49.30 (CH<sub>2</sub>N<sub>3</sub>), 29.26 (CH<sub>2</sub>CH<sub>2</sub>CH<sub>2</sub>), 23.43, 23.30, 23.20,

23.17, 23.00, 22.98 (6 × NCOCH<sub>3</sub>), 21.25, 21.07, 21.02 (3 × OCOCH<sub>3</sub>), 20.89 (2 × OCOCH<sub>3</sub>), 20.73 (2 × OCOCH<sub>3</sub>), 20.70 (2 × OCOCH<sub>3</sub>), 20.68 (1 × OCOCH<sub>3</sub>), 20.64 (3 × OCOCH<sub>3</sub>), 20.60, 20.47 (2 × OCOCH<sub>3</sub>). *m/z* (ESI) calculated for C<sub>95</sub>H<sub>130</sub>N<sub>10</sub>O<sub>52</sub> [M+2H]<sup>2+</sup> 1121.89, found 1121.89.

**3,4-Di-O-benzoyl-6-chloroacetyl-2-phthalimido-2-deoxy-β-D-glucopyranosyl-(1→6)-3,4-di-O-benzoyl-2-trifluoroacetamido-2-deoxy-β-D-glucopyranosyl-(1→6)-3,4-di-O-benzoyl-2-phthalimido-2-deoxy-β-D-glucopyranosyl-(1→6)-3,4-Di-O-benzoyl-2-trifluoroacetamido-2-deoxy-β-D-glucopyranosyl-(1→6)-3,4-di-O-benzoyl-2-trifluoroacetamido-2-deoxy-β-D-glucopyranosyl-(1→6)-3,4-di-O-benzoyl-2-trifluoroacetamido-2-deoxy-β-D-glucopyranosyl-(1→6)-chloroethyl 3,4-di-O-benzoyl-2-trifluoroacetamido-2-deoxy-β-D-glucopyranoside (30)**

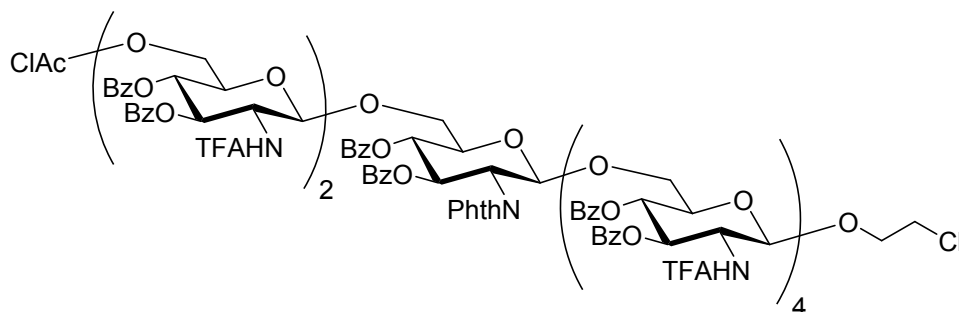

Chloroethyl heptasaccharide **30** was synthesized using the same methods as chloropropyl heptasaccharide **27**. <sup>1</sup>H NMR (600 MHz, Chloroform-*d*) δ<sub>H</sub> 8.54 (d, *J* = 9.7 Hz, 1H, 1 × N-H), 8.36 – 8.28 (m, 3H, 3 × N-H), 8.22 – 8.19 (m, 2H, 2 × Bz), 8.18 – 8.16 (m, 2H, 2 × Bz), 8.12 (d, *J* = 7.3 Hz, 2H, 2 × Bz), 8.08 – 8.04 (m, 9H, 1 × N-H, 8 × Bz), 8.03 – 8.01 (m, 2H, 2 × Bz), 7.98 – 7.88 (m, 12H, 12 × Bz), 7.78 – 7.70 (m, 4H, 2 × Bz, 2 × Phth), 7.66 – 7.22 (m, 28H, 27 × Bz, 1 × Phth), 7.18 (t, *J* = 7.1 Hz, 2H, 2 × Bz), 7.15 – 7.11 (m, 3H, 1 × N-H, 2 × Bz), 7.03 – 6.97 (m, 3H, 2 × Bz, 1 × Phth), 6.54 (dd, *J* = 11.0, 9.4 Hz, 1H, H-3<sup>IV</sup>), 6.28 (t, *J* = 10.6 Hz, 1H, 1 × H-3), 6.26 (t, *J* = 10.2 Hz, 1H, 1 × H-3), 6.12 (t, *J* = 10.0 Hz, 1H, 1 × H-3), 6.07 (t, *J* = 10.2 Hz, 1H, 1 × H-3), 6.01 (t, *J* = 10.2 Hz, 1H, 1 × H-3), 5.71 (dd, *J* = 10.4, 9.3 Hz, 1H, 1 × H-3), 5.59 (t, *J* = 9.7 Hz, 1H, 1 × H-4), 5.54 (t, *J* = 9.8 Hz, 1H, 1 × H-4), 5.53 – 5.43 (m, 2H, 2 × H-4), 5.42 (t, *J* = 9.5 Hz, 1H, 1 × H-4), 5.39 (t, *J* = 9.6 Hz, 1H, H-4<sup>IV</sup>), 5.35 (d, *J* = 8.2 Hz, 1H, 1 × H-1), 5.21 (t, *J* = 9.8 Hz, 1H, 1 × H-4), 5.17 (d, *J* = 8.5 Hz, 1H, 1 × H-1), 5.08 (d, *J* = 8.4 Hz, 1H, H-1<sup>IV</sup>), 4.98 – 4.58 (m, 13H, 3 × H-1, H-2<sup>IV</sup>, 5 × H-2, H-5<sup>IV</sup>, 3 × H-5), 4.56 (d, *J* = 8.4 Hz, 1H, 1 × H-1), 4.34 – 4.14 (m, 5H, 1 × H-5, 3 × H-6a, 1 × H-6b), 4.10 – 4.05 (m, 1H, OCH<sub>2</sub>CH<sub>2</sub>), 4.04 – 3.81 (m, 6H, 2 × H-5, H-6a<sup>IV</sup>, 1 × H-6a, OCH<sub>2</sub>CH<sub>2</sub>, CH<sub>2</sub>CH<sub>2</sub>Cl), 3.80 – 3.72 (m, 2H, 1 × H-6a, COCH<sub>2</sub>Cl), 3.69 – 3.61 (m, 2H, 1 × H-6a, CH<sub>2</sub>CH<sub>2</sub>Cl), 3.59 (d, *J* = 11.2 Hz, 1H, 1 × H-6b), 3.55 (d, *J* = 15.4 Hz, 1H, COCH<sub>2</sub>Cl), 3.50 (d, *J* = 11.6 Hz, 1H, 1 × H-6a), 3.47 – 3.39 (m, 3H, H-6b<sup>IV</sup>, 2 × H-6b), 3.33 (d, *J* = 11.3 Hz, 1H, 1 × H-6b). <sup>13</sup>C NMR (125 MHz, Chloroform-*d*) δ<sub>C</sub> 168.62, 168.46 (2 × COPhth), 167.20 (COCH<sub>2</sub>Cl), 166.86 (2 × COPh), 166.53, 166.50, 166.30, 166.23, 166.17, 165.94, 165.80, 165.73, 165.62, 165.17, 165.04, 164.91 (12 × COPh), 158.84 (d, *J* = 38.6 Hz, 1 × COCF<sub>3</sub>), 158.67 (d, *J* = 38.0 Hz, 1 × COCF<sub>3</sub>), 158.52 (d, *J* = 38.6 Hz, 1 × COCF<sub>3</sub>), 158.30 (d, *J* = 37.7 Hz, 1 × COCF<sub>3</sub>), 158.19 (d, *J* = 37.7 Hz, 1 × COCF<sub>3</sub>), 157.60 (d, *J* = 37.6 Hz, 1 × COCF<sub>3</sub>), 135.07, 134.95 (2 × Phth), 133.97, 133.92, 133.89, 133.74 (4 × Bz), 133.66 (2 × Bz), 133.45, 133.35 (2 × Bz), 133.25 (2 × Bz), 133.16 (1 × Bz), 133.13 (2 × Bz), 130.56 (4° Phth), 130.35 (2 × Bz), 130.31 (4° Phth), 130.21 (2 × Bz), 130.19 (2 × Bz), 130.09 (2 × Bz),

130.06 (2 × Bz), 129.94 (2 × Bz), 129.88 (2 × Bz), 129.85 (2 × Bz), 129.84 (4 × Bz), 129.74 (4 × Bz), 129.68 (2 × Bz), 129.59 (2 × Bz), 128.99 (6 × Bz), 128.97, 128.93, 128.90, 128.87, 128.79 (5 × 4° Bz), 128.74 (2 × Bz), 128.72, 128.68 (2 × 4° Bz), 128.64 (2 × Bz), 128.62, 128.57 (2 × 4° Bz), 128.56 (2 × Bz), 128.49 (2 × Bz), 128.47 (4° Bz), 128.44 (2 × Bz), 128.37 (4° Bz), 128.34 (6 × Bz), 128.26 (2 × Bz), 128.25 (4 × Bz), 128.18 (4° Bz), 124.29, 123.55 (2 × Phth), 115.79 (q,  $J = 287.2$  Hz, 1 × CF<sub>3</sub>), 115.72 (q,  $J = 287.7$  Hz, 2 × CF<sub>3</sub>), 115.41 (q,  $J = 288.5$  Hz, 1 × CF<sub>3</sub>), 115.22 (q,  $J = 286.7$  Hz, 1 × CF<sub>3</sub>), 115.20 (q,  $J = 286.8$  Hz, 1 × CF<sub>3</sub>), 103.98, 103.36, 102.81, 101.51 (4 × C-1), 100.90 (C-1<sup>IV</sup>), 100.87, 100.41 (2 × C-1), 74.33 (1 × C-5), 74.07 (1 × C-6), 73.75 (C-6<sup>IV</sup>), 73.70, 73.49 (2 × C-6), 72.99 (C-5<sup>IV</sup>), 72.89 (1 × C-3, 1 × C-5), 72.78 (1 × C-5), 72.68 (1 × C-3), 72.64 (1 × C-4), 72.42 (C-4<sup>IV</sup>, 1 × C-4, 2 × C-5), 72.29 (1 × C-5), 72.21 (1 × C-4), 72.05 (1 × C-3), 71.88, 71.53 (2 × C-6), 71.46 (1 × C-4), 71.32, 70.77 (2 × C-3), 70.57 (OCH<sub>2</sub>CH<sub>2</sub>), 70.34 (1 × C-4), 69.98 (1 × C-3), 69.54 (1 × C-4), 69.31 (C-3<sup>IV</sup>), 63.69 (1 × C-6), 57.92, 55.53, 55.30 (3 × C-2), 55.18 (C-2<sup>IV</sup>), 55.05 (1 × C-2), 54.92 (2 × C-), 41.82 (CH<sub>2</sub>CH<sub>2</sub>Cl), 40.52 (COCH<sub>2</sub>Cl).  $m/z$  (MALDI) calculated for C<sub>164</sub>H<sub>135</sub>N<sub>7</sub>O<sub>52</sub>F<sub>18</sub>Cl<sub>2</sub>Na [M+Na]<sup>+</sup> 3468.71, found 3468.41.

**2-Acetamido-3,4,6-tri-O-acetyl-2-deoxy-β-D-glucopyranosyl-(1→6)-2-acetamido-3,4-di-O-acetyl-2-deoxy-β-D-glucopyranosyl-(1→6)-3,4-di-O-acetyl-2-phthalimido-2-deoxy-β-D-glucopyranosyl-(1→6)-2-acetamido-3,4-di-O-acetyl-2-deoxy-β-D-glucopyranosyl-(1→6)-2-acetamido-3,4-di-O-acetyl-2-deoxy-β-D-glucopyranosyl-(1→6)-2-acetamido-3,4-di-O-acetyl-2-deoxy-β-D-glucopyranosyl-(1→6)-chloroethyl 2-acetamido-3,4-di-O-acetyl-2-deoxy-β-D-glucopyranoside (31) & Compound (32)**

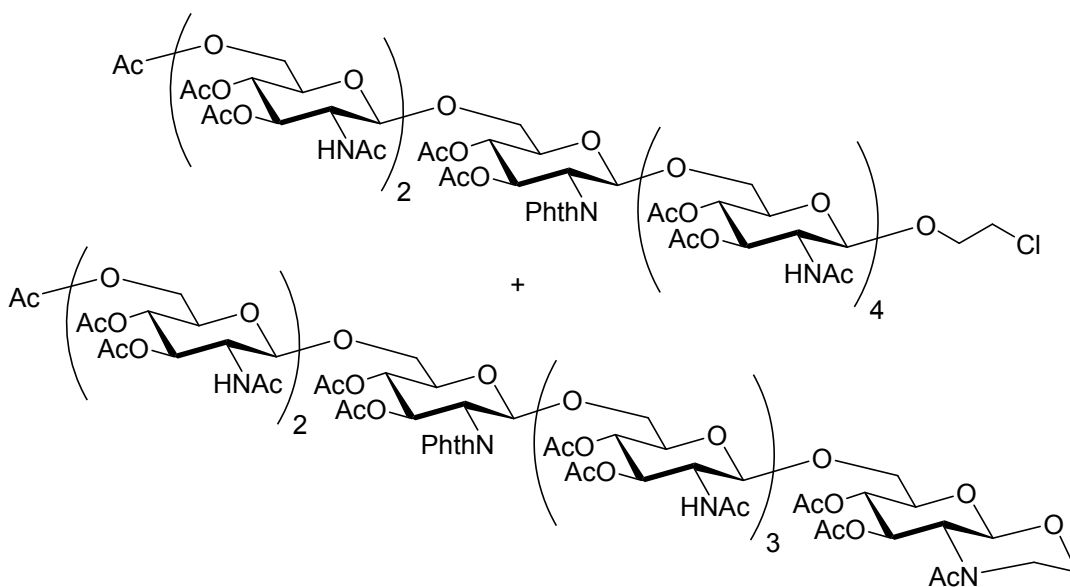

Chloroethyl heptasaccharide **30** (105 mg, 0.030 mmol) was dissolved in a 2:4:1 mixture of 4 M NaOH (1.0 mL, 4.0 mmol, 131 equiv.), THF (2.0 mL), and MeOH (0.5 mL). The reaction was stirred at 50 °C for 5 h. The solution was concentrated and dried under high vacuum. The residue was dissolved in a 1:1 mixture of pyridine (4 mL, 49.5 mmol, 1624 equiv.) and Ac<sub>2</sub>O (4 mL, 42.3 mmol, 1390 equiv.). The reaction was stirred at RT for 16 h (TLC in 8:2 EtOAc/EtOH, R<sub>f</sub> = 0.2). The solution co-concentrated with toluene. The residue was dissolved in CHCl<sub>3</sub> (40 mL) then washed with 1 M HCl (20 mL) then sat. aq. NaHCO<sub>3</sub> (20 mL). The aqueous layers were re-

extracted with CHCl<sub>3</sub> (3 × 10 mL). The organic layers were dried over Na<sub>2</sub>SO<sub>4</sub> and concentrated. Column chromatography (EtOAc/EtOH, 19:1 → 7:3) gave an inseparable mixture (49.6 mg) containing peracetylated heptasaccharide **31** and cyclized compound **32** as a white solid. **Analytical data for 31:** *m/z* (MALDI) calculated for C<sub>94</sub>H<sub>126</sub>N<sub>7</sub>O<sub>52</sub>NaCl [M+Na]<sup>+</sup> 2242.70, found 2242.73. **Analytical data for 32:** *m/z* (MALDI) calculated for C<sub>94</sub>H<sub>125</sub>N<sub>7</sub>O<sub>52</sub>Na [M+Na]<sup>+</sup> 2206.72, found 2206.51.

### 3,4,6-Tri-O-acetyl-2-trifluoroacetamido-2-deoxy- $\alpha$ -D-glucopyranosyl chloride (**33**)

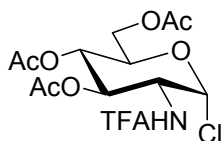

Known<sup>8</sup> compound **33** was synthesized partly based on the methods by Joseph et al.<sup>5</sup> and Horton.<sup>9</sup> <sup>1</sup>H NMR (400 MHz, Chloroform-*d*)  $\delta_{\text{H}}$  6.71 (d, *J* = 8.2 Hz, 1H, N-H), 6.23 (d, *J* = 3.8 Hz, 1H, H-1), 5.38 (m, 1H, H-3), 5.25 (t, *J* = 9.8 Hz, 1H, H-4), 4.50 (ddd, *J* = 10.7, 8.5, 3.6 Hz, 1H, H-2), 4.35 – 4.27 (m, 2H, H-5, H-6a), 4.15 (m, 1H, H-6b), 2.11, 2.07, 2.06 (3 s, 9H, 3 × Ac). The NMR data are in agreement with those reported in the literature.<sup>8</sup>

### Chloroethyl 3,4,6-tri-O-acetyl-2-trifluoroacetamido-2-deoxy- $\beta$ -D-glucopyranoside (**34**)

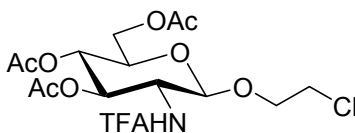

Chloride donor **33** (1.19 g, 2.84 mmol) and 2-chloroethanol (1.9 mL, 28.3 mmol, 10 equiv.) were dissolved in freshly distilled CH<sub>2</sub>Cl<sub>2</sub> (40 mL) containing freshly activated powdered 4Å MS (2.4 g). The mixture was stirred at 0 °C under Ar in the dark for 1 h. AgOTf (0.95 g, 3.70 mmol, 1.3 equiv.) in dry toluene (5 mL) was added, and the reaction was stirred under the same conditions for 2 h (TLC in 7:13 EtOAc/pentanes, R<sub>f</sub> = 0.3), then quenched with NEt<sub>3</sub>. The mixture was diluted with CH<sub>2</sub>Cl<sub>2</sub> (30 mL) and filtered through celite. The solids were washed with CH<sub>2</sub>Cl<sub>2</sub> (3 × 30 mL). The filtrate was washed with sat. aq. NaCl (2 × 125 mL). The aqueous layers were re-extracted with CH<sub>2</sub>Cl<sub>2</sub> (2 × 25 mL). The organic layers were dried over Na<sub>2</sub>SO<sub>4</sub> and concentrated. Column chromatography (EtOAc/pentanes, 3:7 → 6:4) gave chloroethyl glycoside **34** (0.94 g, 72%) as white crystals. <sup>1</sup>H NMR (400 MHz, Chloroform-*d*)  $\delta_{\text{H}}$  6.77 (d, *J* = 9.1 Hz, 1H, N-H), 5.33 (dd, *J* = 10.7, 9.3 Hz, 1H, H-3), 5.09 (dd, *J* = 10.0, 9.3 Hz, 1H, H-4), 4.77 (d, *J* = 8.3 Hz, 1H, H-1), 4.27 (dd, *J* = 12.3, 4.9 Hz, 1H, H-6a), 4.16 (dd, *J* = 12.4, 2.5 Hz, 1H, H-6b), 4.11 (dt, *J* = 11.2, 4.8 Hz, 1H, OCHHCH<sub>2</sub>), 4.02 (dt, *J* = 10.8, 8.6 Hz, 1H, H-2), 3.81 – 3.72 (m, 2H, H-5, OCHHCH<sub>2</sub>), 3.62 (dd, *J* = 6.5, 4.8 Hz, 2H, CH<sub>2</sub>Cl), 2.09, 2.03, 2.03 (3 s, 9H, 3 × Ac). <sup>13</sup>C NMR (100 MHz, Chloroform-*d*)  $\delta_{\text{C}}$  171.03, 170.67, 169.29 (3 × COCH<sub>3</sub>), 157.48 (d, *J* = 37.9 Hz, COCF<sub>3</sub>), 115.53 (d, *J* = 288.2 Hz, CF<sub>3</sub>), 100.55 (C-1), 72.07 (C-5), 71.53 (C-3), 69.89 (OCH<sub>2</sub>CH<sub>2</sub>), 68.34 (C-4), 61.90 (C-6), 54.79 (C-2), 42.70 (CH<sub>2</sub>Cl), 20.69, 20.54, 20.37 (3 × CH<sub>3</sub>). *m/z* (ESI) calculated for C<sub>16</sub>H<sub>25</sub>N<sub>2</sub>O<sub>9</sub>F<sub>3</sub>Cl [M+NH<sub>4</sub>]<sup>+</sup> 481.12, found 481.12.

### Chloroethyl 3,4,6-tri-O-acetyl-2-acetamido-2-deoxy- $\beta$ -D-glucopyranoside (**35**) & Compound (**36**)



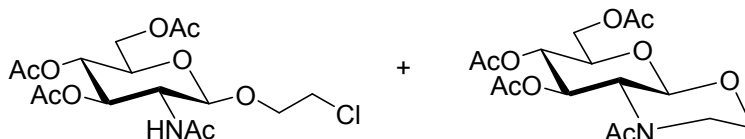

Chloroethyl glycoside **34** (50 mg, 0.108 mmol) was dissolved in a 2:4:1 mixture of 0.5 M NaOH (4.3 mL, 2.15 mmol, 20 equiv.), THF (8.6 mL), and MeOH (2.1 mL). The reaction was stirred at 40-60 °C for 2-20 h (Table 1). The solution was concentrated and dried under high vacuum. The residue was dissolved in a 1:1 mixture of pyridine (5 mL, 61.8 mmol, 572 equiv.) and Ac<sub>2</sub>O (5 mL, 52.9 mmol, 490 equiv.). The reaction was stirred at RT for 2h (TLC in 8:2 EtOAc/pentanes, R<sub>f</sub> = 0.3, 0.1). The solution co-concentrated with toluene. The residue was dissolved in CH<sub>2</sub>Cl<sub>2</sub> (30 mL) then washed with 1 M HCl (2 × 30 mL) then sat. aq. NaHCO<sub>3</sub> (30 mL). The aqueous layers were re-extracted with CH<sub>2</sub>Cl<sub>2</sub> (2 × 7 mL). The organic layers were dried over Na<sub>2</sub>SO<sub>4</sub> and concentrated. Column chromatography (8:2 → 1:0 EtOAc/pentanes) gave known<sup>1,2</sup> chloroethyl glycoside **35** as a white amorphous solid, and bicyclic compound **36** as a pale yellow amorphous solid (see Table 1 for yields). **Analytical data for 35:** <sup>1</sup>H NMR (400 MHz, Chloroform-*d*) δ<sub>H</sub> 5.72 (d, *J* = 8.6 Hz, 1H, N-H), 5.31 (dd, *J* = 10.5, 9.4 Hz, 1H, H-3), 5.05 (t, *J* = 9.6 Hz, 1H, H-4), 4.78 (d, *J* = 8.4 Hz, 1H, H-1), 4.25 (dd, *J* = 12.3, 4.8 Hz, 1H, H-6a), 4.13 (dd, *J* = 12.2, 2.4 Hz, 1H, H-6b), 4.08 (dt, *J* = 11.2, 4.9 Hz, 1H, OCHHCH<sub>2</sub>), 3.86 (dt, *J* = 10.5, 8.6 Hz, 1H, H-2), 3.78 (dt, *J* = 11.5, 6.3 Hz, 1H, OCHHCH<sub>2</sub>), 3.72 (ddd, *J* = 9.9, 4.8, 2.4 Hz, 1H, H-5), 3.64 – 3.61 (m, 2H, CH<sub>2</sub>Cl), 2.08, 2.02, 2.01 (3 s, 9H, 3 × OCOCH<sub>3</sub>), 1.95 (s, 3H, NCOCH<sub>3</sub>). The NMR data are in agreement with those reported in the literature.<sup>2</sup> **Analytical data for 36:** <sup>1</sup>H NMR (400 MHz, Chloroform-*d*) δ<sub>H</sub> 6.31 (dd, *J* = 10.9, 9.1 Hz, 1H, H-3), 4.94 (dd, *J* = 10.0, 9.2 Hz, 1H, H-4), 4.65 (d, *J* = 8.2 Hz, 1H, H-1), 4.27 (dd, *J* = 12.4, 4.7 Hz, 1H, H-6a), 4.13 (dd, *J* = 12.3, 2.1 Hz, 1H, H-6b), 4.03 (dt, *J* = 11.5, 3.2 Hz, 1H, OCHHCH<sub>2</sub>), 3.89 (ddd, *J* = 10.1, 4.7, 2.1 Hz, 1H, H-5), 3.73 (td, *J* = 11.6, 11.0, 3.1 Hz, 1H, OCHHCH<sub>2</sub>), 3.63 (dt, *J* = 14.6, 3.2 Hz, 1H, CHHN), 3.40 (ddd, *J* = 13.8, 10.5, 3.2 Hz, 1H, CHHN), 3.22 (dd, *J* = 11.2, 8.2 Hz, 1H, H-2), 2.09 (s, 3H, NAc), 2.05, 2.00, 1.95 (3 s, 9H, 3 × OAc). <sup>13</sup>C NMR (100 MHz, Chloroform-*d*) δ<sub>C</sub> 170.62, 170.51, 169.93, 169.45 (4 × COCH<sub>3</sub>), 96.39 (C-1), 72.65 (C-5), 70.86 (C-3), 69.71 (C-4), 65.89 (OCH<sub>2</sub>CH<sub>2</sub>), 63.73 (C-2), 61.95 (C-6), 47.75 (CH<sub>2</sub>N), 23.42 (NCOCH<sub>3</sub>), 20.88, 20.70, 20.68 (3 × OCOCH<sub>3</sub>). *m/z* (DART) calculated for C<sub>16</sub>H<sub>24</sub>NO<sub>9</sub> [M+H]<sup>+</sup> 374.14, found 374.1.

**3,4-Di-O-benzoyl-6-chloroacetyl-2-trifluoroacetamido-2-deoxy-β-D-glucopyranosyl-(1→6)-3,4-di-O-benzoyl-2-trifluoroacetamido-2-deoxy-β-D-glucopyranosyl-(1→6)-3,4-di-O-benzoyl-2-phthalimido-2-deoxy-β-D-glucopyranosyl-(1→6)-3,4-di-O-benzoyl-2-trifluoroacetamido-2-deoxy-β-D-glucopyranosyl-(1→6)-azidoethyl 3,4-di-O-benzoyl-2-trifluoroacetamido-2-deoxy-β-D-glucopyranoside (37)**

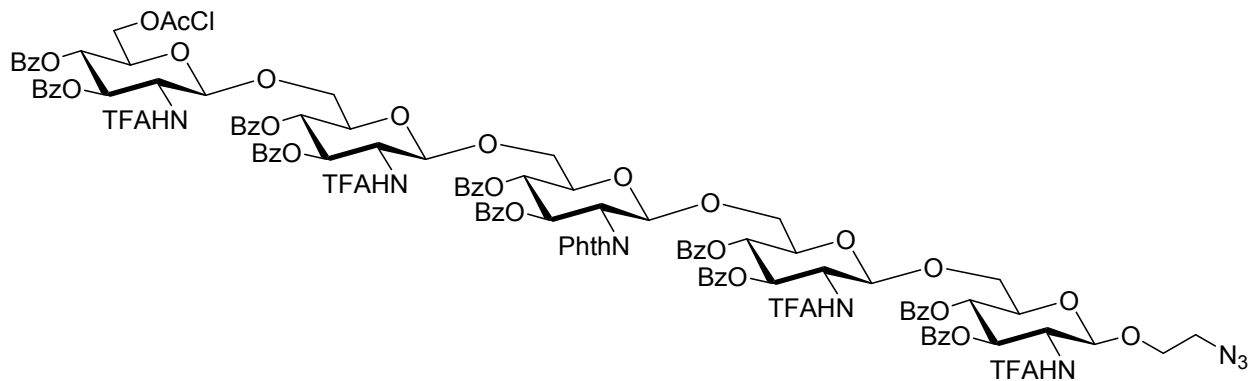

Azidoethyl pentasaccharide **37** was synthesized using similar methods to chloropropyl pentasaccharide **20**.  $^1\text{H}$  NMR (600 MHz, Chloroform-*d*)  $\delta_{\text{H}}$  8.42 (d,  $J = 6.8$  Hz, 1H, 1  $\times$  N-H), 8.36 (d,  $J = 10.1$  Hz, 1H, 1  $\times$  N-H), 8.12 – 8.04 (m, 9H, 1  $\times$  N-H, 8  $\times$  Bz), 8.02 – 7.96 (m, 10H, 10  $\times$  Bz), 7.92 (dd,  $J = 8.4, 1.3$  Hz, 2H, 2  $\times$  Bz), 7.72 (d,  $J = 7.4$  Hz, 1H, 1  $\times$  Phth), 7.67 (t,  $J = 7.1$  Hz, 1H, 1  $\times$  Phth), 7.63 – 7.61 (m, 2H, 2  $\times$  Bz), 7.60 – 7.39 (m, 16H, 15  $\times$  Bz, 1  $\times$  Phth), 7.38 – 7.31 (m, 7H, 7  $\times$  Bz), 7.21 (dt,  $J = 7.6, 1.5$  Hz, 2H, 2  $\times$  Bz), 7.17 (dt,  $J = 7.6, 1.6$  Hz, 2H, 2  $\times$  Bz), 7.13 (dt,  $J = 7.8, 1.9$  Hz, 3H, 2  $\times$  Bz, 1  $\times$  Phth), 6.99 (d,  $J = 8.4$  Hz, 1H, 1  $\times$  N-H), 6.56 (dd,  $J = 11.0, 9.0$  Hz, 1H, H-3"), 6.31 (dd,  $J = 10.5, 9.1$  Hz, 1H, 1  $\times$  H-3), 6.06 (dd,  $J = 10.0$  Hz, 1H, 1  $\times$  H-3), 5.91 (dd,  $J = 10.2$  Hz, 1H, 1  $\times$  H-3), 5.77 – 5.68 (m, 3H, 1  $\times$  H-3, H-4", 1  $\times$  H-4), 5.55 (dd,  $J = 10.1, 9.4$  Hz, 1H, 1  $\times$  H-4), 5.41 – 5.35 (m, 2H, 1  $\times$  H-1, 1  $\times$  H-4), 5.30 (d,  $J = 8.5$  Hz, 1H, H-1"), 5.10 (t,  $J = 9.9$  Hz, 1H, 1  $\times$  H-4), 5.04 (d,  $J = 8.4$  Hz, 1H, 1  $\times$  H-1), 4.91 (d,  $J = 8.4$  Hz, 1H, 1  $\times$  H-1), 4.84 (dd,  $J = 11.1, 8.6$  Hz, 1H, H-2"), 4.79 – 4.62 (m, 6H, 1  $\times$  H-1, 2  $\times$  H-2, H-5", 2  $\times$  H-5), 4.57 (q,  $J = 9.4$  Hz, 1H, 1  $\times$  H-2), 4.33 (dd,  $J = 12.3, 2.4$  Hz, 1H, 1  $\times$  H-6a), 4.26 (dd,  $J = 13.1, 10.9$  Hz, 1H, 1  $\times$  H-6a), 4.23 – 4.14 (m, 3H, 1  $\times$  H-5, 1  $\times$  H-6b, OCHHCH<sub>2</sub>), 4.12 (dd,  $J = 13.1, 10.4$  Hz, 1H, H-6a"), 4.08 (dd,  $J = 13.0, 1.2$  Hz, 1H, 1  $\times$  H-6a), 3.98 – 3.90 (m, 2H, 1  $\times$  H-2, 1  $\times$  H-5), 3.87 (dd,  $J = 12.9, 9.7$  Hz, 1H, 1  $\times$  H-6b), 3.82 (d,  $J = 15.5$  Hz, 1H, CHHCl), 3.73 (ddd,  $J = 11.6, 8.7, 3.6$  Hz, 1H, OCHHCH<sub>2</sub>), 3.67 – 3.62 (m, 2H, 1  $\times$  H-6a, H-6b"), 3.59 (d,  $J = 15.5$  Hz, 1H, CHHCl), 3.59 – 3.53 (m, 2H, 1  $\times$  H-6b, CHHN<sub>3</sub>), 3.47 (dd,  $J = 12.6, 1.7$  Hz, 1H, 1  $\times$  H-6b), 3.32 (dt,  $J = 13.3, 4.0$  Hz, 1H, CHHN<sub>3</sub>).  $^{13}\text{C}$  NMR (125 MHz, Chloroform-*d*)  $\delta_{\text{C}}$  169.17, 167.98 (2  $\times$  COPhth), 167.30 (COCH<sub>2</sub>Cl), 166.87, 166.83, 166.51, 166.50, 166.45, 165.72, 165.58, 165.34, 165.14, 164.94 (10  $\times$  CPh), 158.13 (d,  $J = 36.0$  Hz, 1  $\times$  COCF<sub>3</sub>), 158.10 (d,  $J = 38.0$  Hz, 1  $\times$  COCF<sub>3</sub>), 158.00 (d,  $J = 36.3$  Hz, 1  $\times$  COCF<sub>3</sub>), 157.57 (d,  $J = 37.3$  Hz, 1  $\times$  COCF<sub>3</sub>), 135.03, 134.92 (2  $\times$  Phth), 133.93, 133.86, 133.85, 133.77, 133.74, 133.54, 133.39, 133.35, 133.35, 133.21 (10  $\times$  Bz), 130.69, 130.52 (2  $\times$  4° Phth), 130.21 (2  $\times$  Bz), 130.20 (2  $\times$  Bz), 130.16 (2  $\times$  Bz), 130.08 (2  $\times$  Bz), 129.93 (2  $\times$  Bz), 129.90 (4  $\times$  Bz), 129.83 (2  $\times$  Bz), 129.81 (2  $\times$  Bz), 129.70 (2  $\times$  Bz), 129.08 (2  $\times$  Bz), 129.04 (1  $\times$  4° Bz), 128.93 (2  $\times$  Bz), 128.85, 128.81, 128.69, 128.67 (4  $\times$  4° Bz), 128.64 (2  $\times$  Bz), 128.62 (1  $\times$  4° Bz), 128.57 (2  $\times$  Bz), 128.46 (2  $\times$  Bz), 128.40 (1  $\times$  4° Bz), 128.38 (4  $\times$  Bz), 128.35 (2  $\times$  Bz), 128.31 (2  $\times$  Bz), 128.24 (2  $\times$  Bz), 128.19, 128.12 (2  $\times$  4° Bz), 124.31, 123.49 (2  $\times$  Phth), 115.88 (q,  $J = 288.2$  Hz, 1  $\times$  CF<sub>3</sub>), 115.58 (q,  $J = 287.7$  Hz, 1  $\times$  CF<sub>3</sub>), 115.36 (q,  $J = 288.5$  Hz, 1  $\times$  CF<sub>3</sub>), 115.06 (q,  $J = 286.9$  Hz, 1  $\times$  CF<sub>3</sub>), 104.10, 101.70, 100.68 (3  $\times$  C-1), 100.53 (C-1"), 100.27 (1  $\times$  C-1), 74.65 (1  $\times$  C-5), 73.88 (C-6"), 73.56 (1  $\times$  C-6), 73.48 (C-5"), 72.65 (1  $\times$  C-3), 72.52 (1  $\times$  C-6), 72.50 (1  $\times$  C-5), 72.40 (1  $\times$  C-4), 72.33 (1  $\times$  C-5), 72.32 (1  $\times$  C-6), 72.31 (1  $\times$  C-5), 72.24 (1  $\times$  C-3), 71.75 (C-4"), 71.69, 71.52 (2  $\times$  C-4), 69.90 (2  $\times$  C-3), 69.60 (1  $\times$  C-4), 69.40 (C-3"), 68.93 (OCH<sub>2</sub>CH<sub>2</sub>), 63.64 (1  $\times$  C-6),

57.91, 55.38 (2 × C-2), 55.26 (C-2''), 54.54, 54.39 (2 × C-2), 50.31 (CH<sub>2</sub>N<sub>3</sub>), 40.54 (CH<sub>2</sub>Cl). *m/z* (ESI) calculated for C<sub>120</sub>H<sub>103</sub>N<sub>9</sub>O<sub>38</sub>F<sub>12</sub>Cl [M+NH<sub>4</sub>]<sup>+</sup> 2540.59, found 2540.59.

**2-Acetamido-3,4,6-tri-O-acetyl-2-deoxy-β-D-glucopyranosyl-(1→6)-2-acetamido-3,4-di-O-acetyl-2-deoxy-β-D-glucopyranosyl-(1→6)-3,4-di-O-acetyl-2-phthalimido-2-deoxy-β-D-glucopyranosyl-(1→6)-2-acetamido-3,4-di-O-acetyl-2-deoxy-β-D-glucopyranosyl-(1→6)-azidoethyl 2-acetamido-3,4-di-O-acetyl-2-deoxy-β-D-glucopyranoside (38)**

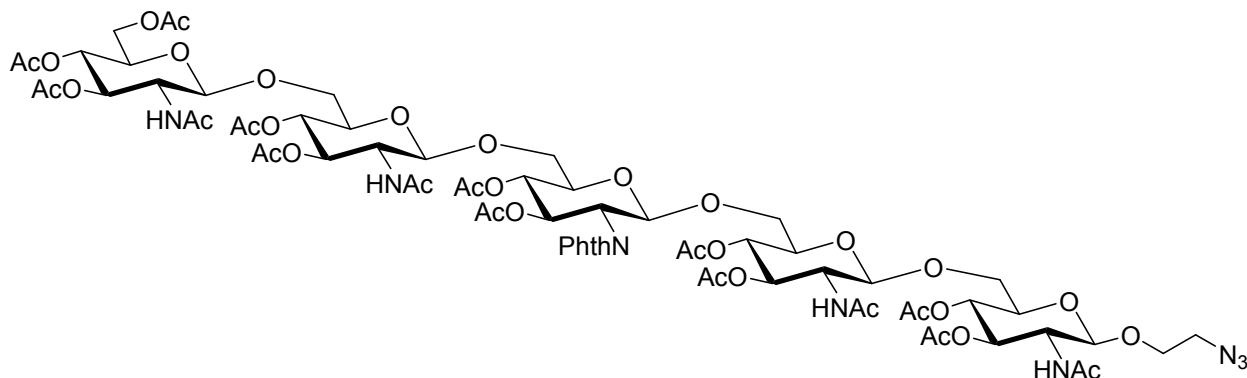

Azidoethyl pentasaccharide **37** (46.5 mg, 0.018 mmol) was dissolved in a 2:4:1 mixture of 0.5 M NaOH (3.6 mL, 1.8 mmol, 100 equiv.), THF (7.2 mL), and MeOH (1.8 mL). The reaction was stirred at 40 °C for 2 h. The solution was concentrated and dried under high vacuum. The residue was dissolved in a 1:1 mixture of pyridine (4.5 mL, 55.6 mmol, 3089 equiv.) and Ac<sub>2</sub>O (4.5 mL, 47.6 mmol, 2644 equiv.). The reaction was stirred at 50 °C for 1 h, then left to attain RT for 18 h (TLC in 9:1 EtOAc/EtOH, R<sub>f</sub> = 0.2). The solution co-concentrated with toluene. The residue was dissolved in CH<sub>2</sub>Cl<sub>2</sub> (20 mL) then washed with 1 M HCl (20 mL) then aq. NaHCO<sub>3</sub> (20 mL). The aqueous layers were re-extracted with CH<sub>2</sub>Cl<sub>2</sub> (2 × 5 mL). The organic layers were dried over Na<sub>2</sub>SO<sub>4</sub> and concentrated. Column chromatography (EtOAc/EtOH, 19:1 → 17:3) gave pentasaccharide **38** (17.1 mg, 56%) as a white amorphous solid. <sup>1</sup>H NMR (600 MHz, Chloroform-*d*) δ<sub>H</sub> 7.85 – 7.72 (m, 4H, 4 × Phth), 7.39 (d, *J* = 8.9 Hz, 1H, 1 × N-H), 6.84 (d, *J* = 7.9 Hz, 1H, 1 × N-H), 6.74 (d, *J* = 9.7 Hz, 1H, 1 × N-H), 6.21 (d, *J* = 9.2 Hz, 1H, 1 × N-H), 5.77 (dd, *J* = 10.9, 8.9 Hz, 1H, H-3''), 5.65 (t, *J* = 9.7 Hz, 1H, 1 × H-3), 5.28 – 5.21 (m, 3H, H-1'', 1 × H-1, 1 × H-3), 5.20 (dd, *J* = 10.6, 9.2 Hz, 1H, 1 × H-3), 5.15 (dd, *J* = 10.8, 9.2 Hz, 1H, 1 × H-3), 5.00 (dd, *J* = 10.3, 8.9 Hz, 1H, H-4''), 4.92 – 4.85 (m, 3H, 3 × H-4), 4.73 – 4.68 (dd, *J* = 10.0, 9.2 Hz, 1H, 1 × H-4), 4.58 (d, *J* = 8.5 Hz, 2H, 2 × H-1), 4.48 (d, *J* = 8.5 Hz, 1H, 1 × H-1), 4.41 – 4.31 (m, 4H, H-2'', H-5'', 1 × H-5, 1 × H-6a), 4.29 – 4.19 (m, 3H, 2 × H-2, 1 × H-5), 4.06 (q, *J* = 9.1 Hz, 1H, 1 × H-2), 4.02 – 3.96 (m, 2H, H-6a'', OCHHCH<sub>2</sub>), 3.92 (dd, *J* = 12.1, 2.1 Hz, 1H, 1 × H-6b), 3.89 – 3.84 (m, 2H, 2 × H-5), 3.81 – 3.68 (m, 4H, 1 × H-2, 2 × H-6a, 1 × H-6b), 3.67 – 3.60 (m, 3H, 1 × H-6a, H-6b'', OCHHCH<sub>2</sub>), 3.58 (dd, *J* = 12.3, 2.8 Hz, 1H, 1 × H-6b), 3.54 – 3.51 (m, 1H, 1 × H-6b), 3.49 – 3.42 (m, 1H, CHHN<sub>3</sub>), 3.21 (ddd, *J* = 13.5, 4.7, 3.3 Hz, 1H, CHHN<sub>3</sub>), 2.13, 2.11, 2.08, 2.07, 2.07, 2.06 (6 s, 18H, 6 × OAc), 2.06, 2.05 (2 s, 6H, 2 × NAc), 2.04, 2.01, 2.00 (3 s, 9H, 3 × OAc), 1.97 (s, 3H, 1 × NAc), 1.95 (s, 3H, 1 × OAc), 1.91 (s, 3H, 1 × NAc), 1.90 (s, 3H, 1 × OAc). <sup>13</sup>C NMR (125 MHz, Chloroform-*d*) δ<sub>C</sub> 171.72, 171.05, 170.88, 170.78, 170.64, 170.45, 170.36, 170.32, 170.30, 170.18, 169.94, 169.84, 169.78, 169.72, 169.66 (15 × COCH<sub>3</sub>), 134.90 (2 × Phth), 131.03 (2 × 4° Phth), 124.00, 123.50 (2 × Phth), 103.83, 101.93 (2 × C-1), 100.61 (C-1'', 1 × C-1), 99.65 (1 × C-1), 73.80 (1 × C-5), 73.31, 73.21 (2 × C-3), 72.80 (C-5''), 72.27 (1 × C-5), 72.05 (1 × C-3, 1 × C-6), 71.46 (1 × C-5), 71.33 (1 × C-3),

71.12 (1 × C-6), 71.03 (1 × C-5), 70.82, 70.77 (2 × C-4), 70.67 (C-4<sup>''</sup>), 70.04 (C-3<sup>''</sup>), 69.51, 69.17 (2 × C-4), 68.97 (1 × C-6), 68.27 (C-6<sup>''</sup>, OCH<sub>2</sub>CH<sub>2</sub>), 62.37 (1 × C-6), 55.44 (1 × C-2), 55.20 (C-2<sup>''</sup>), 54.36, 54.14, 53.85 (3 × C-2), 50.38 (CH<sub>2</sub>N<sub>3</sub>), 23.40 (1 × NCOCH<sub>3</sub>), 23.26 (2 × NCOCH<sub>3</sub>), 22.99 (1 × NCOCH<sub>3</sub>), 20.83, 20.78 (2 × OCOCH<sub>3</sub>), 20.76 (2 × OCOCH<sub>3</sub>), 20.73, 20.67, 20.66, 20.64, 20.57, 20.54, 20.40 (7 × OCOCH<sub>3</sub>). *m/z* (ESI) calculated for C<sub>70</sub>H<sub>92</sub>N<sub>8</sub>O<sub>38</sub>Na [M+Na]<sup>+</sup> 1675.54, found 1675.5.

**3,4-Di-O-benzoyl-2-phthalimido-2-deoxy-β-D-glucopyranosyl-(1→6)-3,4-Di-O-benzoyl-2-trifluoroacetamido-2-deoxy-β-D-glucopyranosyl-(1→6)-3,4-di-O-benzoyl-2-trifluoroacetamido-2-deoxy-β-D-glucopyranosyl-(1→6)-3,4-di-O-benzoyl-2-trifluoroacetamido-2-deoxy-β-D-glucopyranosyl-(1→6)-3,4-di-O-benzoyl-2-trifluoroacetamido-2-deoxy-β-D-glucopyranoside (39)**

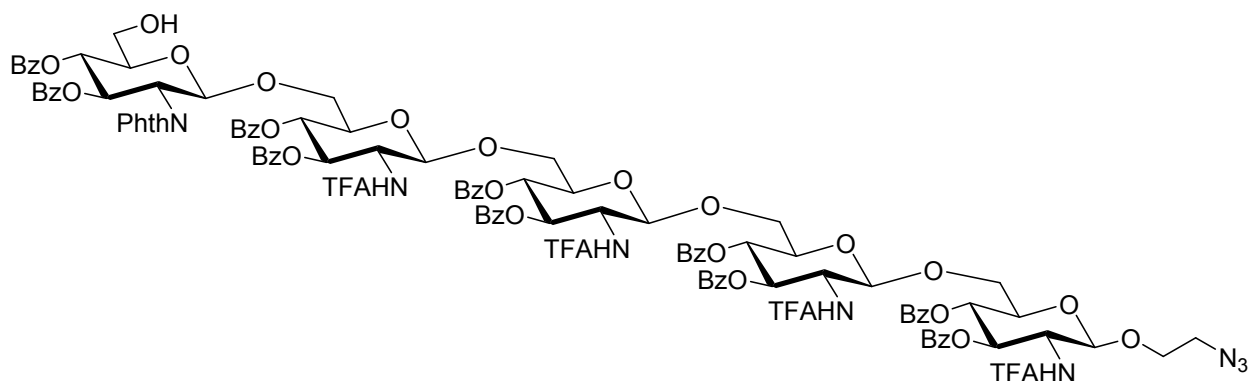

Azidoethyl pentasaccharide **39** was synthesized using similar methods to chloropropyl pentasaccharide **26**. <sup>1</sup>H NMR (600 MHz, Chloroform-*d*) δ<sub>H</sub> 8.51 (d, *J* = 9.9 Hz, 1H, 1 × N-H), 8.45 (d, *J* = 9.6 Hz, 1H, 1 × N-H), 8.16 (dd, *J* = 8.6, 1.3 Hz, 2H, 2 × Bz), 8.13 (d, *J* = 9.7 Hz, 1H, 1 × N-H), 8.10 (dd, *J* = 8.5, 1.5 Hz, 2H, 2 × Bz), 8.06 – 7.94 (m, 16H, 16 × Bz), 7.84 – 7.76 (m, 3H, 3 × Phth), 7.61 – 7.52 (m, 6H, 6 × Bz), 7.50 – 7.26 (m, 21H, 20 × Bz, 1 × Phth), 7.23 (t, *J* = 8.2 Hz, 2H, 2 × Bz), 7.18 (t, *J* = 8.1 Hz, 2H, 2 × Bz), 7.16 (d, *J* = 9.4 Hz, 1H, 1 × N-H), 6.37 (dd, *J* = 10.5, 9.1 Hz, 1H, H-3<sup>IV</sup>), 6.19 (dd, *J* = 10.7, 9.5 Hz, 1H, 1 × H-3), 6.01 (t, *J* = 10.3 Hz, 1H, 1 × H-3), 5.90 (t, *J* = 10.6 Hz, 1H, 1 × H-3), 5.75 (t, *J* = 10.0 Hz, 1H, 1 × H-3), 5.73 (t, *J* = 10.2 Hz, 1H, 1 × H-4), 5.60 (dd, *J* = 10.7, 9.3 Hz, 1H, 1 × H-4), 5.41 (t, *J* = 9.8 Hz, 1H, 1 × H-4), 5.38 (t, *J* = 9.6 Hz, 1H, H-4<sup>IV</sup>), 5.26 (d, *J* = 8.4 Hz, 1H, H-1<sup>IV</sup>), 5.12 (d, *J* = 8.5 Hz, 1H, 1 × H-1), 5.04 (t, *J* = 9.8 Hz, 1H, 1 × H-4), 4.91 – 4.83 (m, 2H, 1 × H-1, 1 × H-2), 4.84 – 4.66 (m, 4H, 1 × H-1, 2 × H-2, 1 × H-5), 4.67 – 4.54 (m, 4H, 1 × H-1, 2 × H-2, 1 × H-5), 4.51 (dd, *J* = 10.4, 9.0 Hz, 1H H-2<sup>IV</sup>), 4.26 – 4.20 (m, 2H, 1 × H-5, 1 × H-6a), 4.14 – 4.06 (m, 3H, H-6a<sup>IV</sup>, 1 × H-6a, OCHHCH<sub>2</sub>), 3.84 – 3.79 (m, 2H, H-5<sup>IV</sup>, OCHHCH<sub>2</sub>), 3.76 – 3.72 (m, 2H, 2 × H-6a), 3.63 – 3.55 (m, 3H, 3 × H-6b), 3.49 – 3.41 (m, 2H, H-6b<sup>IV</sup>, CHHN<sub>3</sub>), 3.36 (dt, *J* = 13.3, 4.8 Hz, 1H, CHHN<sub>3</sub>), 3.31 (d, *J* = 11.7 Hz, 1H, 1 × H-6b), 2.65 (bs, 1H, OH-6<sup>IV</sup>). <sup>13</sup>C NMR (125 MHz, Chloroform-*d*) δ<sub>C</sub> 168.55, 167.50 (2 × COPht), 166.63, 166.48, 166.46, 166.41, 166.29, 166.04, 166.01, 165.74, 165.42, 164.94 (10 × COPh), 158.49 (d, *J* = 36.5 Hz, 1 × COCF<sub>3</sub>), 158.47 (d, *J* = 36.4 Hz, 1 × COCF<sub>3</sub>), 158.16 (d, *J* = 36.6 Hz, 1 × COCF<sub>3</sub>), 158.14 (d, *J* = 36.6 Hz, 1 × COCF<sub>3</sub>), 134.90 (2 × Phth), 133.82 (2 × Bz), 133.74 (2 × Bz), 133.62 (1 × Bz), 133.51 (2 × Bz), 133.40, 133.29, 133.19 (3 × Bz), 130.86 (4° Phth), 130.53 (4° Phth), 130.18 (2 × Bz), 130.15 (2 × Bz), 130.08 (2 × Bz), 129.98 (2 × Bz), 129.92 (2 × Bz), 129.90 (2 × Bz), 129.85 (4 × Bz), 129.49 (2 × Bz), 128.99 (2 × Bz), 128.91 (1 × 4° Bz), 128.79 (2 × Bz), 128.73 (2 × Bz),

128.72, 128.66, 128.61, 128.60 (4 × 4° Bz), 128.58 (2 × 4° Bz), 128.40 (4 × Bz), 128.38 (1 × 4° Bz), 128.35 (2 × Bz), 128.32 (2 × Bz), 128.30 (4 × Bz), 128.28 (2 × Bz), 127.68, 127.03 (2 × 4° Bz), 123.90, 123.51 (2 × Phth), 115.66 (q,  $J = 287.1$  Hz, 1 × CF<sub>3</sub>), 115.64 (q,  $J = 287.8$  Hz, 1 × CF<sub>3</sub>), 115.61 (q,  $J = 289.9$  Hz, 1 × CF<sub>3</sub>), 115.02 (q,  $J = 286.2$  Hz, 1 × CF<sub>3</sub>), 104.15, 103.49, 101.62, 100.08 (4 × C-1), 99.97 (C-1<sup>IV</sup>), 75.18 (C-5<sup>IV</sup>), 74.62 (1 × C-5), 74.21 (1 × C-6), 73.82 (C-6<sup>IV</sup>), 73.77 (1 × C-5), 72.78 (1 × C-3), 72.67 (1 × C-5), 72.34 (1 × C-5, 1 × C-6), 72.26 (1 × C-3), 71.86 (1 × C-4), 71.60 (1 × C-3), 71.49 (1 × C-3, 1 × C-4, 1 × C-6), 71.36 (1 × C-4), 70.31 (C-4<sup>IV</sup>), 70.11 (C-3<sup>IV</sup>), 69.82 (1 × C-4), 69.13 (OCH<sub>2</sub>CH<sub>2</sub>), 61.65 (1 × C-6), 55.17 (C-2<sup>IV</sup>), 55.13, 54.99 (2 × C-2), 54.38 (2 × C-2), 50.12 (CH<sub>2</sub>N<sub>3</sub>).  $m/z$  (MALDI) calculated for C<sub>118</sub>H<sub>98</sub>N<sub>8</sub>O<sub>37</sub>F<sub>12</sub>Na [M+Na]<sup>+</sup> 2469.57, found 2469.84.

**3,4-Di-O-benzoyl-6-chloroacetyl-2-phthalimido-2-deoxy-β-D-glucopyranosyl-(1→6)-3,4-di-O-benzoyl-2-trifluoroacetamido-2-deoxy-β-D-glucopyranosyl-(1→6)-3,4-di-O-benzoyl-2-phthalimido-2-deoxy-β-D-glucopyranosyl-(1→6)-3,4-Di-O-benzoyl-2-trifluoroacetamido-2-deoxy-β-D-glucopyranosyl-(1→6)-3,4-di-O-benzoyl-2-trifluoroacetamido-2-deoxy-β-D-glucopyranosyl-(1→6)-3,4-di-O-benzoyl-2-trifluoroacetamido-2-deoxy-β-D-glucopyranosyl-(1→6)-aminoethyl 3,4-di-O-benzoyl-2-trifluoroacetamido-2-deoxy-β-D-glucopyranoside (40) & 2-Acetamido-3,4,6-tri-O-acetyl-2-deoxy-β-D-glucopyranosyl-(1→6)-2-acetamido-3,4-di-O-acetyl-2-deoxy-β-D-glucopyranosyl-(1→6)-3,4-di-O-acetyl-2-phthalimido-2-deoxy-β-D-glucopyranosyl-(1→6)-2-acetamido-3,4-di-O-acetyl-2-deoxy-β-D-glucopyranosyl-(1→6)-2-acetamido-3,4-di-O-acetyl-2-deoxy-β-D-glucopyranosyl-(1→6)-2-acetamido-3,4-di-O-acetyl-2-deoxy-β-D-glucopyranosyl-(1→6)-acetamidoethyl 2-acetamido-3,4-di-O-acetyl-2-deoxy-β-D-glucopyranoside (41)**

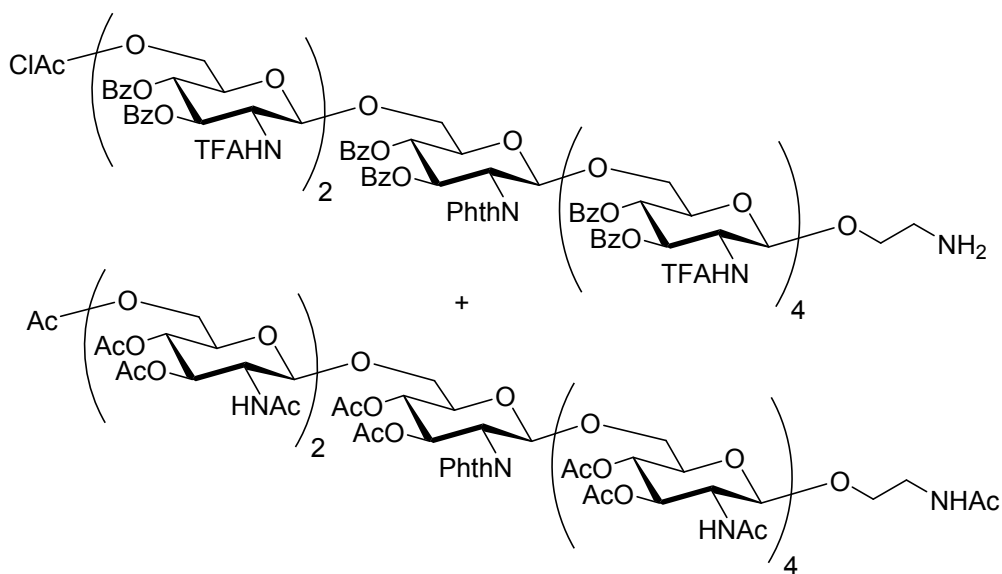

Pentasaccharide acceptor **39** (309 mg, 0.126 mmol) and glycosyl bromide **13** (412 mg, 0.379 mmol, 3 equiv.) were dissolved in freshly distilled CH<sub>2</sub>Cl<sub>2</sub> (4 mL) containing freshly activated powdered 4Å MS (400 mg). The mixture was stirred at -45 °C under Ar in the dark for 1 h. AgOTf (130 mg, 0.506 mmol, 4 equiv.) in dry toluene (1.0 mL) was added, and the reaction was stirred under the same conditions for 2 h (TLC in 4:6 acetone/pentanes, R<sub>f</sub> = 0.2), then quenched with NEt<sub>3</sub>. The mixture was diluted with 10 mL CH<sub>2</sub>Cl<sub>2</sub> and filtered through celite. The solids were washed with CH<sub>2</sub>Cl<sub>2</sub> (3 × 10 mL). The filtrate was washed with sat. aq. NaCl (2 × 30 mL).

The aqueous layers were re-extracted with CH<sub>2</sub>Cl<sub>2</sub> (2 × 5 mL). The organic layers were dried over Na<sub>2</sub>SO<sub>4</sub> and concentrated. Column chromatography (acetone/pentanes, 4:6 → 1:1, then EtOAc/pentanes, 1:1) gave heptasaccharide **40** with small impurities (243 mg) as a yellow solid. A portion of **40** (97 mg, 0.028 mmol) was dissolved in a 2:4:1 mixture of 0.5 M NaOH (8 mL, 4.0 mmol, 140 equiv.), THF (16 mL), and MeOH (4 mL). The reaction was stirred at 40 °C for 3 h. The solution was concentrated and dried under high vacuum. The residue was dissolved in a 1:1 mixture of pyridine (10 mL, 105.8 mmol, 3768 equiv.) and Ac<sub>2</sub>O (10 mL, 123.6 mmol, 4414 equiv.). The reaction was stirred at 50 °C for 2 h, then left to attain RT for 16 h (TLC in 7:3 EtOAc/EtOH, R<sub>f</sub> = 0.3). The solution co-concentrated with toluene. The residue was dissolved in CHCl<sub>3</sub> (60 mL) then washed with 1 M HCl (30 mL) then sat. aq. NaHCO<sub>3</sub> (30 mL). The aqueous layers were re-extracted with CHCl<sub>3</sub> (3 × 15 mL each). The organic layers were dried over Na<sub>2</sub>SO<sub>4</sub> and concentrated. Column chromatography (EtOAc/EtOH, 17:3 → 1:1) gave heptasaccharide **41** (36.2 mg, 32% over three steps) as a yellow solid. **Analytical Data for 40:** *m/z* (MALDI) calculated for C<sub>164</sub>H<sub>137</sub>N<sub>8</sub>O<sub>52</sub>F<sub>18</sub>NaCl [M+Na]<sup>+</sup> 3449.76, found 3449.86. **Analytical Data for 41:** <sup>1</sup>H NMR (600 MHz, Acetone-*d*<sub>6</sub>) δ<sub>H</sub> 8.13 (d, *J* = 10.0 Hz, 1H, 1 × N-H), 8.02 – 7.99 (m, 1H, 1 × Phth), 7.98 – 7.92 (m, 3H, 3 × Phth), 7.90 (d, *J* = 9.7 Hz, 1H, 1 × N-H), 7.79 (d, *J* = 9.6 Hz, 1H, 1 × N-H), 7.52 (d, *J* = 10.1 Hz, 1H, 1 × N-H), 7.51 (d, *J* = 9.8 Hz, 1H, 1 × N-H), 7.46 (d, *J* = 9.5 Hz, 1H, 1 × N-H), 6.98 (t, *J* = 5.2 Hz, 1H, CH<sub>2</sub>NHAc), 5.92 (dd, *J* = 10.7, 8.7 Hz, 1H, H-3<sup>IV</sup>), 5.45 (d, *J* = 8.5 Hz, 1H, H-1<sup>IV</sup>), 5.45 (dd, *J* = 10.5, 9.4 Hz, 1H, 1 × H-3), 5.41 – 5.33 (m, 3H, 1 × H-1, 2 × H-3), 5.27 – 5.17 (m, 3H, 3 × H-3), 5.05 – 4.90 (m, 5H, H-4<sup>IV</sup>, 4 × H-4), 4.81 – 4.76 (m, 4H, 2 × H-1, 1 × H-4, 1 × H-5), 4.74 (d, *J* = 8.6 Hz, 1H, 1 × H-1), 4.70 – 4.61 (m, 4H, 2 × H-1, 1 × H-4, 1 × H-5), 4.58 – 4.51 (m, 1H, 1 × H-5), 4.49 – 4.37 (m, 5H, H-2<sup>IV</sup>, 2 × H-2, H-5<sup>IV</sup>, 1 × H-5), 4.35 (dt, *J* = 10.4, 9.2 Hz, 1H, 1 × H-2), 4.26 (q, *J* = 9.4 Hz, 1H, 1 × H-2), 4.18 (dd, *J* = 12.4, 4.6 Hz, 1H, 1 × H-6a), 4.16 – 4.03 (m, 4H, 2 × H-2, 1 × H-5, H-6a<sup>IV</sup>), 4.00 – 3.93 (m, 2H, 1 × H-6a, 1 × H-6b), 3.90 – 3.81 (m, 4H, 1 × H-5, 2 × H-6a, H-6b<sup>IV</sup>), 3.79 (t, *J* = 5.9 Hz, 2H, OCH<sub>2</sub>CH<sub>2</sub>), 3.76 – 3.71 (m, 2H, 2 × H-6a, 1 × H-6b), 3.69 (dd, *J* = 12.5, 1.9 Hz, 1H, 1 × H-6b), 3.58 (dd, *J* = 7.5, 2.9 Hz, 1H, 1 × H-6b), 3.56 (dd, *J* = 7.7, 2.9 Hz, 1H, 1 × H-6b), 3.47 (dd, *J* = 12.6, 2.7 Hz, 1H, 1 × H-6b), 3.37 – 3.31 (m, 2H, CH<sub>2</sub>N), 2.21, 2.15, 2.12, 2.11, 2.11, 2.07, 2.03, 2.02, 1.98, 1.98, 1.97, 1.96, 1.95, 1.95 (14 s, 42H, 14 × CH<sub>3</sub>), 1.92 (s, 6H, 2 × CH<sub>3</sub>), 1.89, 1.86, 1.86, 1.85, 1.82, 1.77 (6 s, 18H, 6 × CH<sub>3</sub>). <sup>13</sup>C NMR (125 MHz, Acetone-*d*<sub>6</sub>) δ<sub>C</sub> 171.62, 171.48, 171.47, 171.07, 170.94, 170.71, 170.67, 170.66, 170.64, 170.62, 170.59, 170.55, 170.52 (13 × COCH<sub>3</sub>), 170.46 (2 × COCH<sub>3</sub>), 170.44, 170.43, 170.38, 170.32, 170.06, 169.88, 169.58 (7 × COCH<sub>3</sub>), 169.28, 168.97 (2 × CPhth), 136.27, 136.04 (2 × Phth), 132.07, 131.99 (2 × 4° Phth), 124.85, 124.17 (2 × Phth), 104.65, 104.25, 104.10, 102.98, 101.10, 100.67 (6 × C-1), 100.62 (C-1<sup>IV</sup>), 75.23, 75.00 (2 × C-3), 74.61 (1 × C-5), 73.81 (1 × C-3), 73.63 (1 × C-5), 73.49 (C-6<sup>IV</sup>), 73.37, 73.32 (2 × C-3), 73.28 (1 × C-5), 72.98, 72.96, 72.92 (3 × C-6), 72.76 (1 × C-3), 72.33 (1 × C-6), 72.16 (1 × C-5), 72.10 (1 × C-4), 72.09 (C-4<sup>IV</sup>), 72.07 (1 × C-5), 72.05, 71.91 (2 × C-4), 71.56 (C-5<sup>IV</sup>, 1 × C-5), 71.15 (1 × C-4), 70.88 (C-3<sup>IV</sup>), 70.53, 69.75 (2 × C-4), 68.82 (OCH<sub>2</sub>CH<sub>2</sub>), 65.40, 62.66 (2 × C-6), 56.54 (C-2<sup>IV</sup>), 55.74, 55.21, 55.13, 54.84, 54.69, 52.02 (6 × C-2), 39.83 (CH<sub>2</sub>N), 23.50 – 22.79 (7 × NCOCH<sub>3</sub>), 21.25 – 20.26 (15 × OCOCH<sub>3</sub>). *m/z* (ESI) calculated for C<sub>96</sub>H<sub>132</sub>N<sub>8</sub>O<sub>53</sub> [M+2H]<sup>2+</sup> 1122.90, found 1122.90.

**2-Acetamido-2-deoxy-β-D-glucopyranosyl-(1→6)-azidopropyl 2-acetamido-2-deoxy-β-D-glucopyranoside (44)**

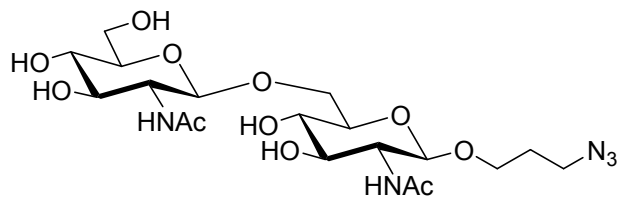

Disaccharide **47** (9.0 mg, 0.0125 mmol) was dissolved in MeOH (1.0 mL). Sodium (0.1 mg, 0.0043 mmol, 0.33 equiv.) was added. The reaction was stirred at RT for 3 h, then quenched with Dowex 50WX8 cation exchange resin (hydrogen form, 50-100 mesh). The resin was filtered and washed with MeOH. The filtrate was concentrated giving deprotected PNAG disaccharide **44** (6.1 mg, 95%) as a white powder.  $^1\text{H}$  NMR (600 MHz, Deuterium Oxide)  $\delta_{\text{H}}$  4.55 (d,  $J = 8.5$  Hz, 1H, H-1), 4.50 (d,  $J = 8.5$  Hz, 1H, H-1'), 4.22 (dd,  $J = 11.2, 1.8$  Hz, 1H, H-6a), 3.96 – 3.92 (m, 2H, H-6a', OCHHCH<sub>2</sub>), 3.79 – 3.72 (m, 3H, H-2, H-6b, H-6b'), 3.69 – 3.63 (m, 2H, H-2', OCHHCH<sub>2</sub>), 3.59 – 3.52 (m, 3H, H-3, H-3', H-5), 3.48 – 3.46 (m, 2H, H-4, H-5'), 3.42 – 3.35 (m, 3H, H-4', CH<sub>2</sub>N<sub>3</sub>), 2.06, 2.06 (2 s, 6H, 2 × CH<sub>3</sub>), 1.85 (p,  $J = 6.5$  Hz, 2H, CH<sub>2</sub>CH<sub>2</sub>CH<sub>2</sub>).  $^{13}\text{C}$  NMR (125 MHz, Deuterium Oxide)  $\delta_{\text{C}}$  174.46, 174.40 (2 × COCH<sub>3</sub>), 101.37 (C-1), 101.02 (C-1'), 75.76 (C-5'), 74.48 (C-5), 73.65 (C-3'), 73.63 (C-3), 69.91 (C-4'), 69.83 (C-4), 68.44 (C-6), 66.88 (OCH<sub>2</sub>CH<sub>2</sub>), 60.62 (C-6'), 55.46 (C-2'), 55.39 (C-2), 47.70 (CH<sub>2</sub>N<sub>3</sub>), 28.01 (CH<sub>2</sub>CH<sub>2</sub>CH<sub>2</sub>), 22.14, 22.07 (2 × CH<sub>3</sub>).  $m/z$  (ESI) calculated for C<sub>19</sub>H<sub>34</sub>N<sub>5</sub>O<sub>11</sub> [M+H]<sup>+</sup> 508.22, found 508.23.

**3,4,6-Tri-O-benzoyl-2-trifluoroacetamido-2-deoxy- $\beta$ -D-glucopyranosyl-(1 $\rightarrow$ 6)-chloropropyl 3,4-di-O-benzoyl-2-trifluoroacetamido-2-deoxy- $\beta$ -D-glucopyranoside (**45**)**

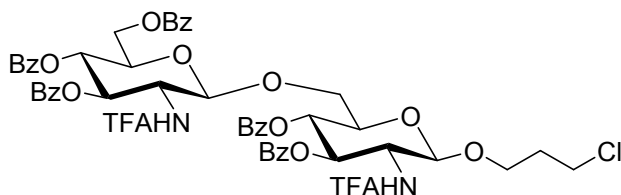

Disaccharide **15** (56.0 mg 0.055 mmol), DMAP (1.3 mg, 0.011 mmol, 0.2 equiv.), and pyr (17.7  $\mu\text{L}$ , 0.219 mmol, 4 equiv.) were dissolved in DCM (1.0 mL). BzCl (12.7  $\mu\text{L}$ , 0.109 mmol, 2 equiv.) was added. The reaction was stirred at RT for 20 h (TLC in 4:6 EtOAc/pentanes,  $R_f = 0.6$ ). The solution was diluted with CH<sub>2</sub>Cl<sub>2</sub> (4 mL) then washed with 1 M HCl (5 mL) then aq. NaHCO<sub>3</sub> (5 mL). The aqueous layers were re-extracted with CH<sub>2</sub>Cl<sub>2</sub> (2 × 1 mL each). The organic layers were dried over Na<sub>2</sub>SO<sub>4</sub> and concentrated. Column chromatography (EtOAc/pentanes, 3:7) gave disaccharide **45** (53.5 mg, 87%) as a white amorphous solid.  $^1\text{H}$  NMR (600 MHz, Chloroform-*d*)  $\delta_{\text{H}}$  7.94 – 7.89 (m, 6H, 6 × Bz), 7.88 – 7.84 (m, 4H, 4 × Bz), 7.52 – 7.46 (m, 5H, N-H', 4 × Bz), 7.42 (t,  $J = 7.3$  Hz, 1H, 1 × Bz), 7.38 – 7.29 (m, 8H, 8 × Bz), 7.27 (t,  $J = 7.8$  Hz, 2H, 2 × Bz), 6.91 (d,  $J = 8.7$  Hz, 1H, H-H), 5.82 (t,  $J = 10.1$  Hz, 1H, H-3), 5.72 (t,  $J = 9.5$  Hz, 1H, H-4'), 5.70 – 5.64 (m, 1H, H-3'), 5.48 (t,  $J = 9.6$  Hz, 1H, H-4), 4.82 (d,  $J = 8.2$  Hz, 1H, H-1), 4.75 (d,  $J = 8.4$  Hz, 1H, H-1'), 4.60 (q,  $J = 8.8$  Hz, 1H, H-2'), 4.57 (dd,  $J = 12.3, 3.0$  Hz, 1H, H-6a'), 4.40 (dd,  $J = 12.3, 4.9$  Hz, 1H, H-6b'), 4.25 (dd,  $J = 11.6, 1.5$  Hz, 1H, H-6a), 4.11 (q,  $J = 8.9$  Hz, 1H, H-2), 4.08 – 4.02 (m, 2H, H-5', OCHHCH<sub>2</sub>), 3.90 (ddd,  $J = 9.7, 4.5, 1.4$  Hz, 1H, H-5), 3.67 (ddd,  $J = 10.7, 9.0, 4.9$  Hz, 1H, OCHHCH<sub>2</sub>), 3.64 – 3.59 (m, 3H, H-6b, CH<sub>2</sub>Cl), 2.13 – 2.03 (m, 1H, CH<sub>2</sub>CHHCH<sub>2</sub>), 2.01 – 1.92 (m, 1H, CH<sub>2</sub>CHHCH<sub>2</sub>).  $^{13}\text{C}$  NMR (125 MHz, Chloroform-*d*)  $\delta_{\text{C}}$  166.72, 166.56, 166.08, 165.77, 165.01 (5 × COPh), 157.68 (d,  $J = 37.4$  Hz, 1 × COCF<sub>3</sub>), 157.46 (d,  $J = 37.8$  Hz, 1 × COCF<sub>3</sub>), 133.94, 133.76, 133.65, 133.52,

133.16 (5 × Bz), 129.89 (2 × Bz), 129.85 (4 × Bz), 129.76 (2 × Bz), 129.67 (2 × Bz), 129.35 (1 × 4° Bz), 128.65 (1 × 4° Bz), 128.51 (2 × Bz), 128.46 (4 × Bz), 128.42 (2 × Bz), 128.35 (2 × Bz), 128.29 (1 × 4° Bz), 128.16 (1 × 4° Bz), 128.06 (1 × 4° Bz), 115.71 (q,  $J = 288.2$  Hz, 1 × CF<sub>3</sub>), 115.44 (q,  $J = 288.2$  Hz, 1 × CF<sub>3</sub>), 101.55 (C-1'), 100.53 (C-1), 73.33 (C-5), 72.82 (C-3'), 72.42 (C-5'), 71.90 (C-3), 69.16 (C-4'), 69.04 (C-4), 68.31 (C-6), 66.23 (OCH<sub>2</sub>CH<sub>2</sub>), 62.79 (C-6'), 55.21 (C-2), 54.79 (C-2'), 41.45 (CH<sub>2</sub>Cl), 31.97 (CH<sub>2</sub>CH<sub>2</sub>CH<sub>2</sub>).  $m/z$  (ESI) calculated for C<sub>54</sub>H<sub>51</sub>N<sub>3</sub>O<sub>16</sub>F<sub>6</sub>Cl [M+NH<sub>4</sub>]<sup>+</sup> 1146.29, found 1146.29.

**3,4,6-Tri-O-benzoyl-2-trifluoroacetamido-2-deoxy-β-D-glucopyranosyl-(1→6)-azidopropyl 3,4-di-O-benzoyl-2-trifluoroacetamido-2-deoxy-β-D-glucopyranoside (46)**

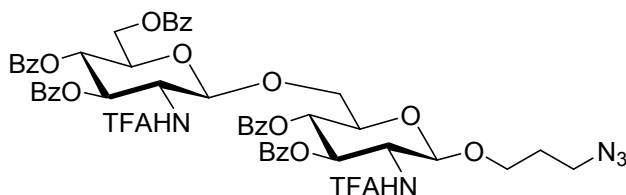

Disaccharide **45** (50.0 mg, 0.044 mmol) and NaN<sub>3</sub> (28.9 mg, 0.445 mmol, 10 equiv.) were dissolved in dry DMF (4.4 mL). The reaction was stirred at 80 °C for 24 h (TLC in 4:6 EtOAc/pentanes,  $R_f = 0.6$ ). The solution was diluted with EtOAc (40 mL) then washed with H<sub>2</sub>O (40 mL). The aqueous layer was re-extracted with EtOAc (2 × 20 mL). The organic layers were dried over Na<sub>2</sub>SO<sub>4</sub> and concentrated. Column chromatography (EtOAc/pentanes, 3:7 → 4:6) gave azidopropyl glycoside **46** (47.0 mg, 93%) as a white amorphous solid. <sup>1</sup>H NMR (600 MHz, Chloroform-*d*) δ<sub>H</sub> 7.92 – 7.87 (m, 6H, 6 × Bz), 7.86 (dd,  $J = 8.4, 1.2$  Hz, 2H, 2 × Bz), 7.83 (d,  $J = 7.8$  Hz, 2H, 2 × Bz), 7.56 (d,  $J = 8.8$  Hz, 1H, N-H'), 7.50 – 7.45 (m, 4H, 4 × Bz), 7.41 (t,  $J = 7.7$  Hz, 1H, 1 × Bz), 7.35 – 7.29 (m, 8H, 8 × Bz), 7.26 (t,  $J = 7.5$  Hz, 2H, 2 × Bz), 6.91 (d,  $J = 7.3$  Hz, 1H, N-H), 5.81 (t,  $J = 10.1$  Hz, 1H, H-3), 5.72 (t,  $J = 9.5$  Hz, 1H, H-4'), 5.65 (t,  $J = 10.2$  Hz, 1H, H-3'), 5.45 (t,  $J = 9.6$  Hz, 1H, H-4), 4.80 (d,  $J = 8.2$  Hz, 1H, H-1), 4.73 (d,  $J = 8.4$  Hz, 1H, H-1'), 4.61 (q,  $J = 8.7$  Hz, 1H, H-2'), 4.56 (dd,  $J = 12.3, 3.0$  Hz, 1H, H-6a'), 4.39 (dd,  $J = 12.2, 5.0$  Hz, 1H, H-6b'), 4.22 (dd,  $J = 11.8, 1.3$  Hz, 1H, H-6a), 4.09 (q,  $J = 10.0, 9.2$  Hz, 1H, H-2), 4.03 (ddd,  $J = 9.5, 4.8, 3.3$  Hz, 1H, H-5'), 4.00 – 3.95 (m, 1H, OCHHCH<sub>2</sub>), 3.87 (ddd,  $J = 9.5, 4.7, 1.4$  Hz, 1H, H-5), 3.62 (dd,  $J = 11.7, 5.1$  Hz, 1H, H-6b), 3.57 (ddd,  $J = 9.5, 7.6, 4.7$  Hz, 1H, OCHHCH<sub>2</sub>), 3.43 – 3.33 (m, 2H, CH<sub>2</sub>N<sub>3</sub>), 1.91 – 1.77 (m, 2H, CH<sub>2</sub>CH<sub>2</sub>CH<sub>2</sub>). <sup>13</sup>C NMR (125 MHz, Chloroform-*d*) δ<sub>C</sub> 166.68, 166.50, 166.08, 165.75, 165.01 (5 × C(=O)Ph), 157.70 (d,  $J = 37.9$  Hz, 1 × COCF<sub>3</sub>), 157.45 (d,  $J = 37.7$  Hz, 1 × COCF<sub>3</sub>), 133.91, 133.74, 133.63, 133.51, 133.15 (5 × Bz), 129.88 (2 × Bz), 129.84 (4 × Bz), 129.77 (2 × Bz), 129.66 (2 × Bz), 129.35 (1 × 4° Bz), 128.66 (1 × 4° Bz), 128.51 (2 × Bz), 128.49 (2 × Bz), 128.45 (2 × Bz), 128.42 (2 × Bz), 128.34 (2 × Bz), 128.30 (1 × 4° Bz), 128.18 (1 × 4° Bz), 128.03 (1 × 4° Bz), 115.73 (q,  $J = 288.0$  Hz, 1 × CF<sub>3</sub>), 115.44 (q,  $J = 288.2$  Hz, 1 × CF<sub>3</sub>), 101.58 (C-1'), 100.34 (C-1), 73.38 (C-5), 72.80 (C-3'), 72.42 (C-5'), 71.84 (C-3), 69.15 (C-4'), 69.03 (C-4), 68.31 (C-6), 66.44 (OCH<sub>2</sub>CH<sub>2</sub>), 62.80 (C-6'), 55.25 (C-2), 54.77 (C-2'), 47.99 (CH<sub>2</sub>N<sub>3</sub>), 28.82 (CH<sub>2</sub>CH<sub>2</sub>CH<sub>2</sub>).  $m/z$  (ESI) calculated for C<sub>54</sub>H<sub>51</sub>N<sub>6</sub>O<sub>16</sub>F<sub>6</sub> [M+NH<sub>4</sub>]<sup>+</sup> 1153.33, found 1153.32.

**2-Acetamido-3,4,6-tri-O-acetyl-2-deoxy-β-D-glucopyranosyl-(1→6)-azidopropyl 2-acetamido-3,4-di-O-acetyl-2-deoxy-β-D-glucopyranoside (47)**



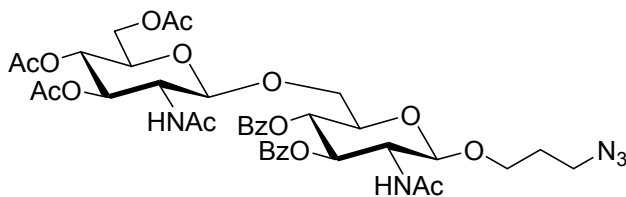

**46** (44.0 mg, 0.039 mmol) was dissolved in a 2:4:1 mixture of 0.5 M NaOH (3.1 mL, 1.55 mmol, 40 equiv.), THF (6.2 mL), and MeOH (1.5 mL). The reaction was stirred at 40 °C for 2 h. The solution was concentrated and dried under high vacuum. The residue was dissolved in a 1:1 mixture of pyridine (5 mL, 61.8 mmol, 1596 equiv.) and Ac<sub>2</sub>O (5 mL, 52.9 mmol, 1366 equiv.). The reaction was stirred at RT for 18 h (TLC in 19:1 EtOAc/EtOH, R<sub>f</sub> = 0.3). The solution co-concentrated with toluene. The residue was dissolved in CH<sub>2</sub>Cl<sub>2</sub> (20 mL) then washed with 1 M HCl (20 mL) then aq. NaHCO<sub>3</sub> (20 mL). The aqueous layers were re-extracted with CH<sub>2</sub>Cl<sub>2</sub> (2 × 5 mL). The organic layers were dried over Na<sub>2</sub>SO<sub>4</sub> and concentrated. Column chromatography (EtOAc/EtOH, 99:1 → 9:1) gave disaccharide **47** (13.3 mg, 48%) as a white amorphous solid. <sup>1</sup>H NMR (600 MHz, Chloroform-*d*) δ<sub>H</sub> 5.86 (d, *J* = 8.3 Hz, 1H, N-H'), 5.47 (d, *J* = 8.0 Hz, 1H, N-H), 5.22 (dd, *J* = 10.5, 9.4 Hz, 1H, H-3), 5.17 (dd, *J* = 10.4, 9.4 Hz, 1H, H-3'), 5.06 (t, *J* = 9.6 Hz, 1H, H-4'), 5.00 (t, *J* = 9.5 Hz, 1H, H-4), 4.59 (d, *J* = 8.3 Hz, 1H, H-1), 4.50 (d, *J* = 8.4 Hz, 1H, H-1'), 4.25 (dd, *J* = 12.3, 4.7 Hz, 1H, H-6a'), 4.11 (dd, *J* = 12.3, 2.3 Hz, 1H, H-6b'), 4.02 – 3.96 (m, 2H, H-2', H-6a), 3.95 – 3.91 (m, 1H, OCHHCH<sub>2</sub>), 3.84 (dt, *J* = 10.2, 8.6 Hz, 1H, H-2), 3.64 (m, 2H, H-5, H-5'), 3.58 – 3.54 (m, 1H, OCHHCH<sub>2</sub>), 3.46 (dd, *J* = 11.3, 5.1 Hz, 1H, H-6b), 3.38 (t, *J* = 6.4 Hz, 2H, CH<sub>2</sub>N<sub>3</sub>), 2.08, 2.04, 2.02, 2.01, 2.00 (5 s, 15H, 5 × OAc), 1.95, 1.94 (2 s, 6H, 2 × NAc), 1.90 – 1.77 (m, 2H, CH<sub>2</sub>CH<sub>2</sub>CH<sub>2</sub>). <sup>13</sup>C NMR (125 MHz, Chloroform-*d*) δ<sub>C</sub> 170.91, 170.86, 170.69, 170.34, 170.20, 170.00, 169.33 (7 × COCH<sub>3</sub>), 101.36 (C-1'), 100.69 (C-1), 72.92 (C-5), 72.79 (C-3'), 72.48 (C-3), 72.04 (C-5'), 68.79 (C-4), 68.38 (C-4'), 67.84 (C-6), 65.90 (OCH<sub>2</sub>CH<sub>2</sub>), 61.97 (C-6'), 54.52 (C-2), 54.25 (C-2'), 48.11 (CH<sub>2</sub>N<sub>3</sub>), 28.90 (CH<sub>2</sub>CH<sub>2</sub>CH<sub>2</sub>), 23.34, 23.15 (2 × NCOCH<sub>3</sub>), 20.78, 20.75, 20.69, 20.66, 20.61 (5 × OCOCH<sub>3</sub>). *m/z* (ESI) calculated for C<sub>29</sub>H<sub>47</sub>N<sub>6</sub>O<sub>16</sub> [M+NH<sub>4</sub>]<sup>+</sup> 735.30, found 735.30.

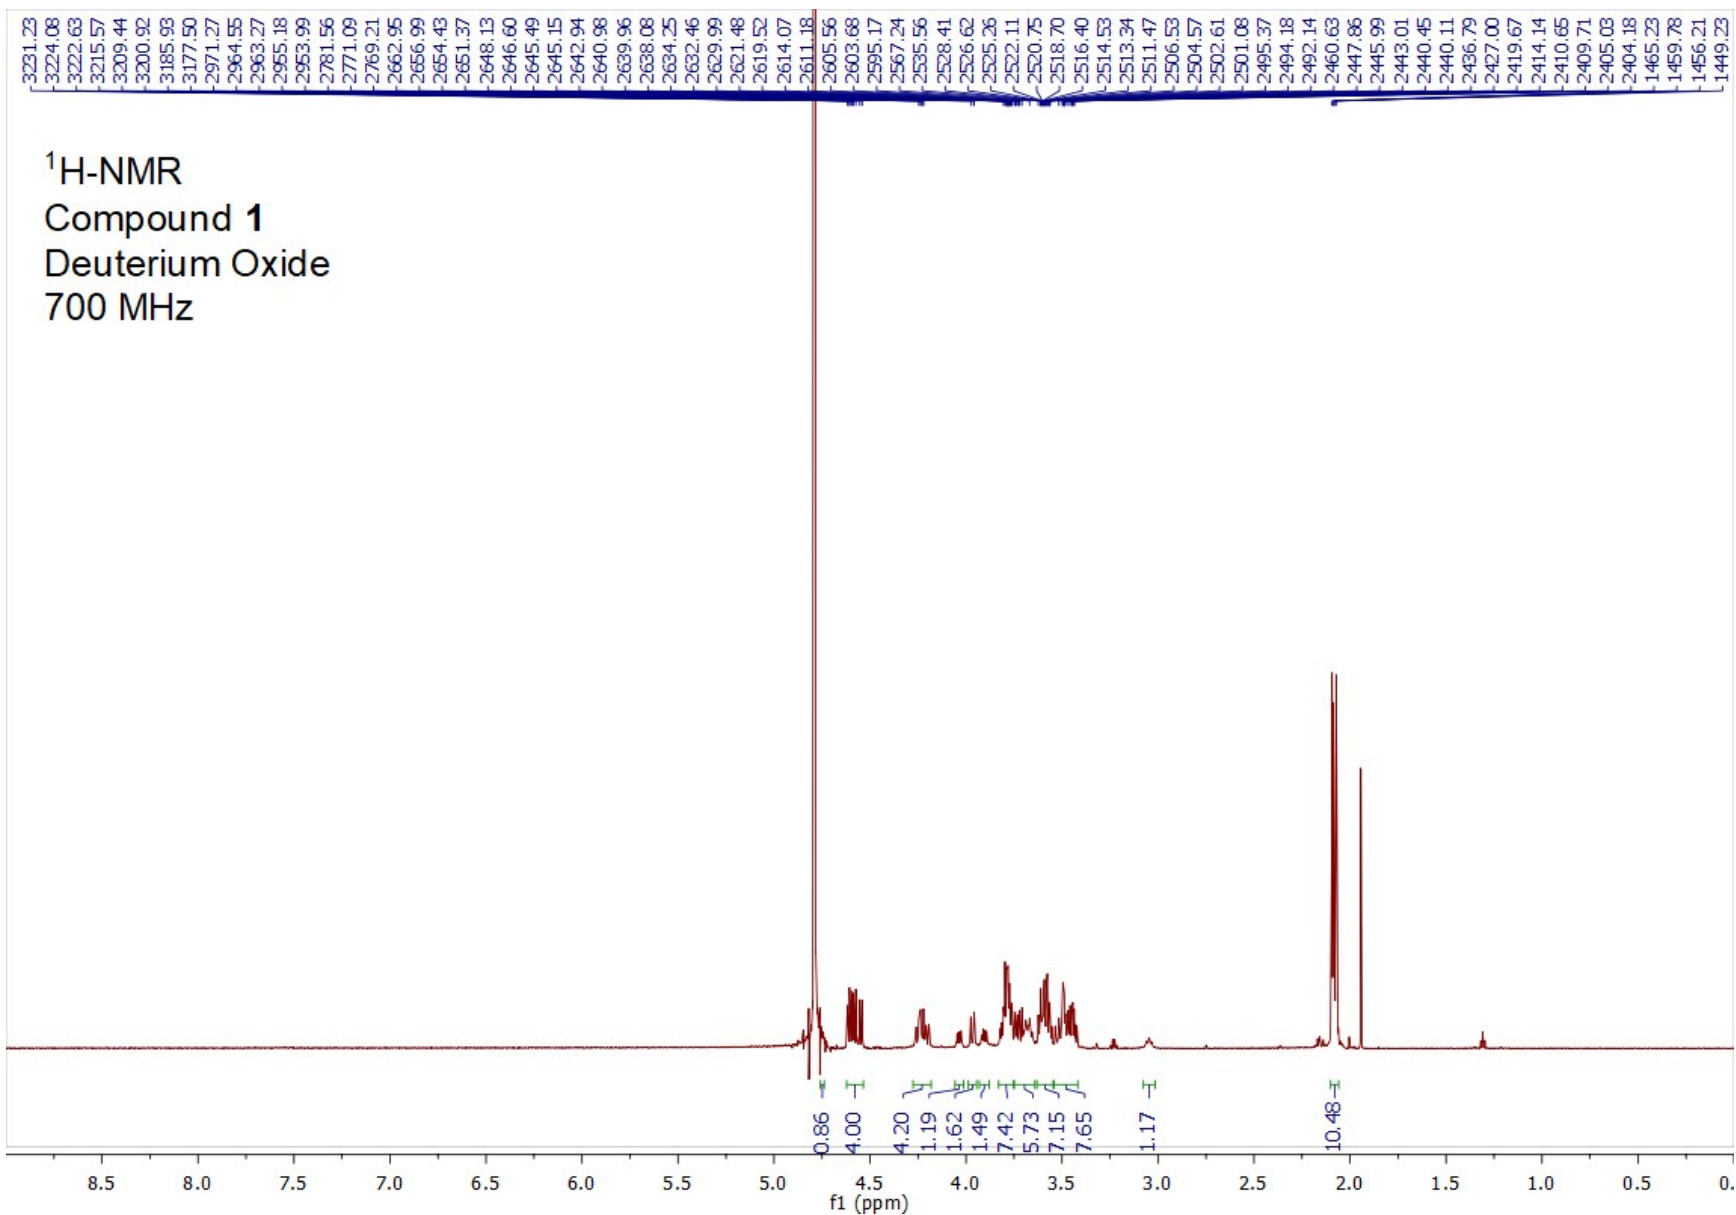

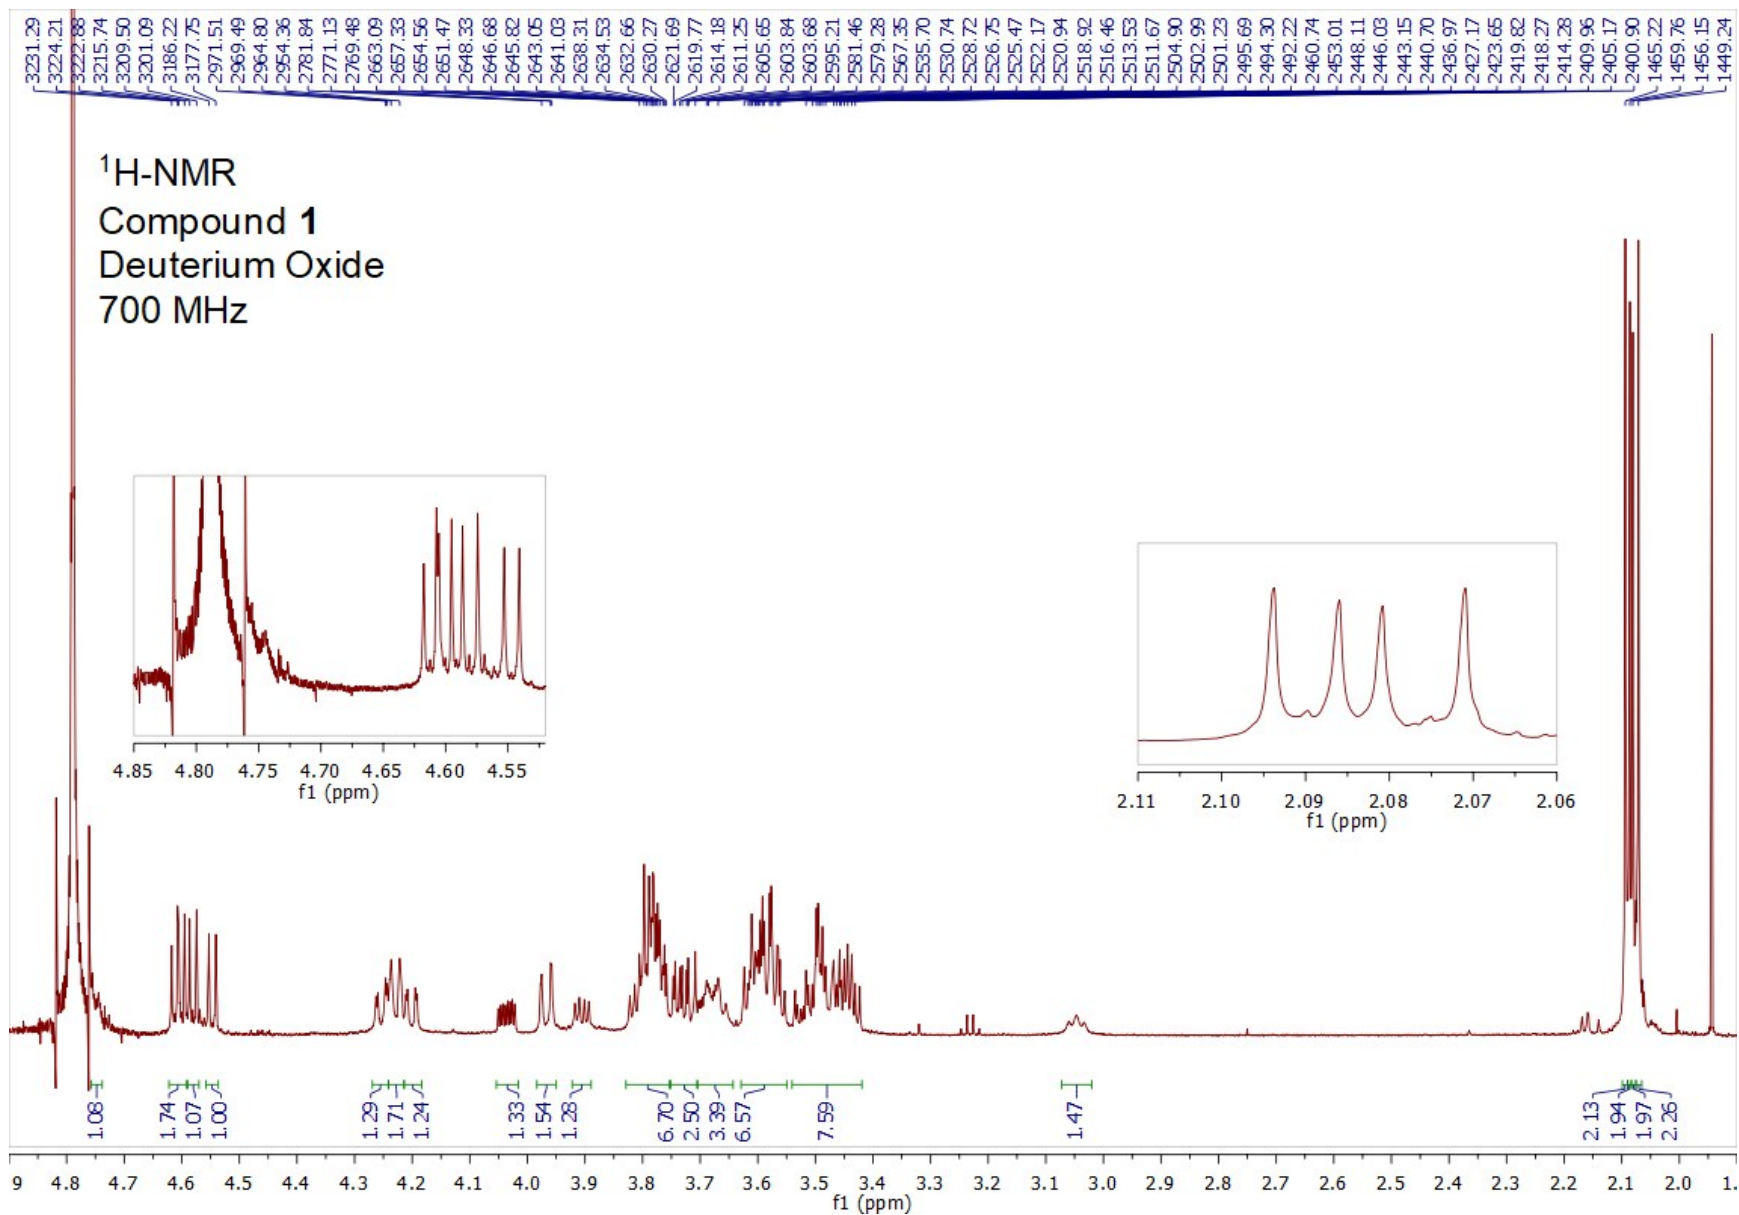

COSY  
Compound 1  
Deuterium Oxide  
500 MHz

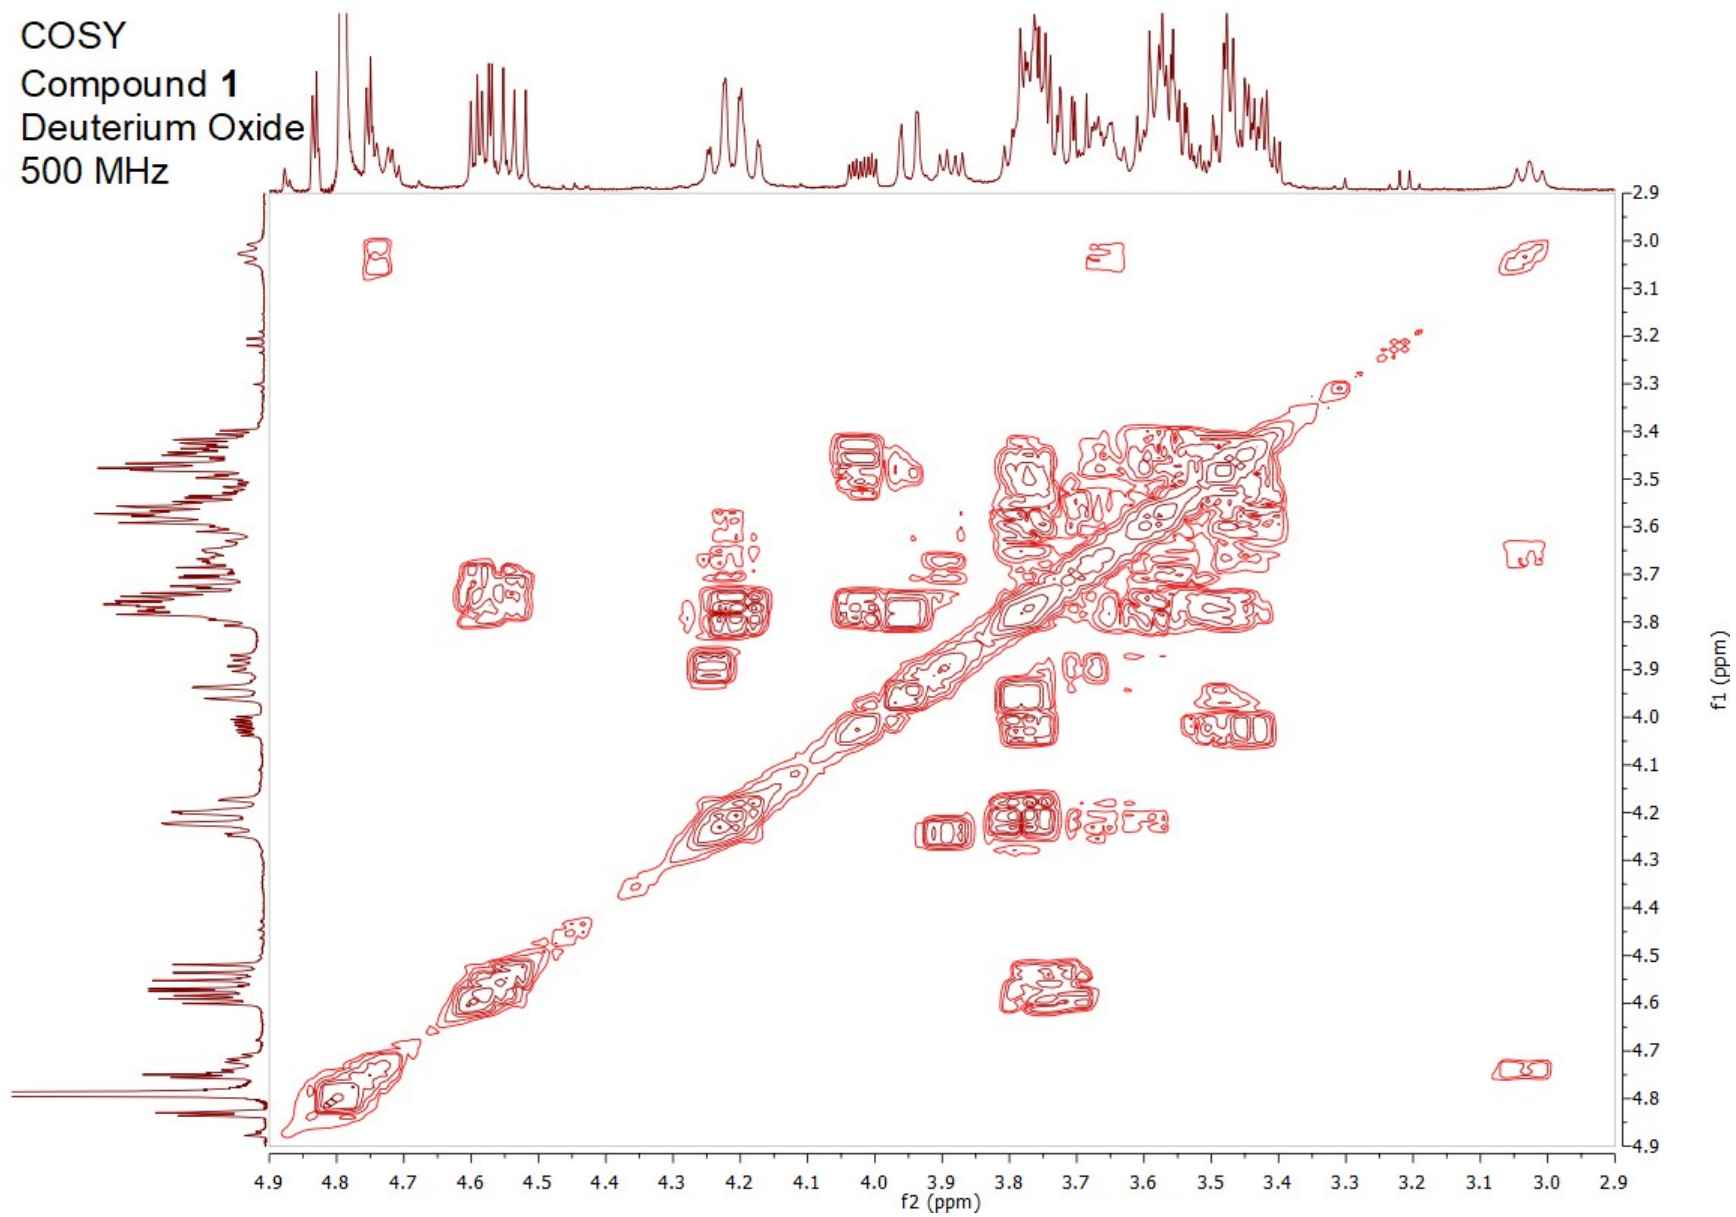

COSY  
Compound 1  
Deuterium Oxide  
700 MHz

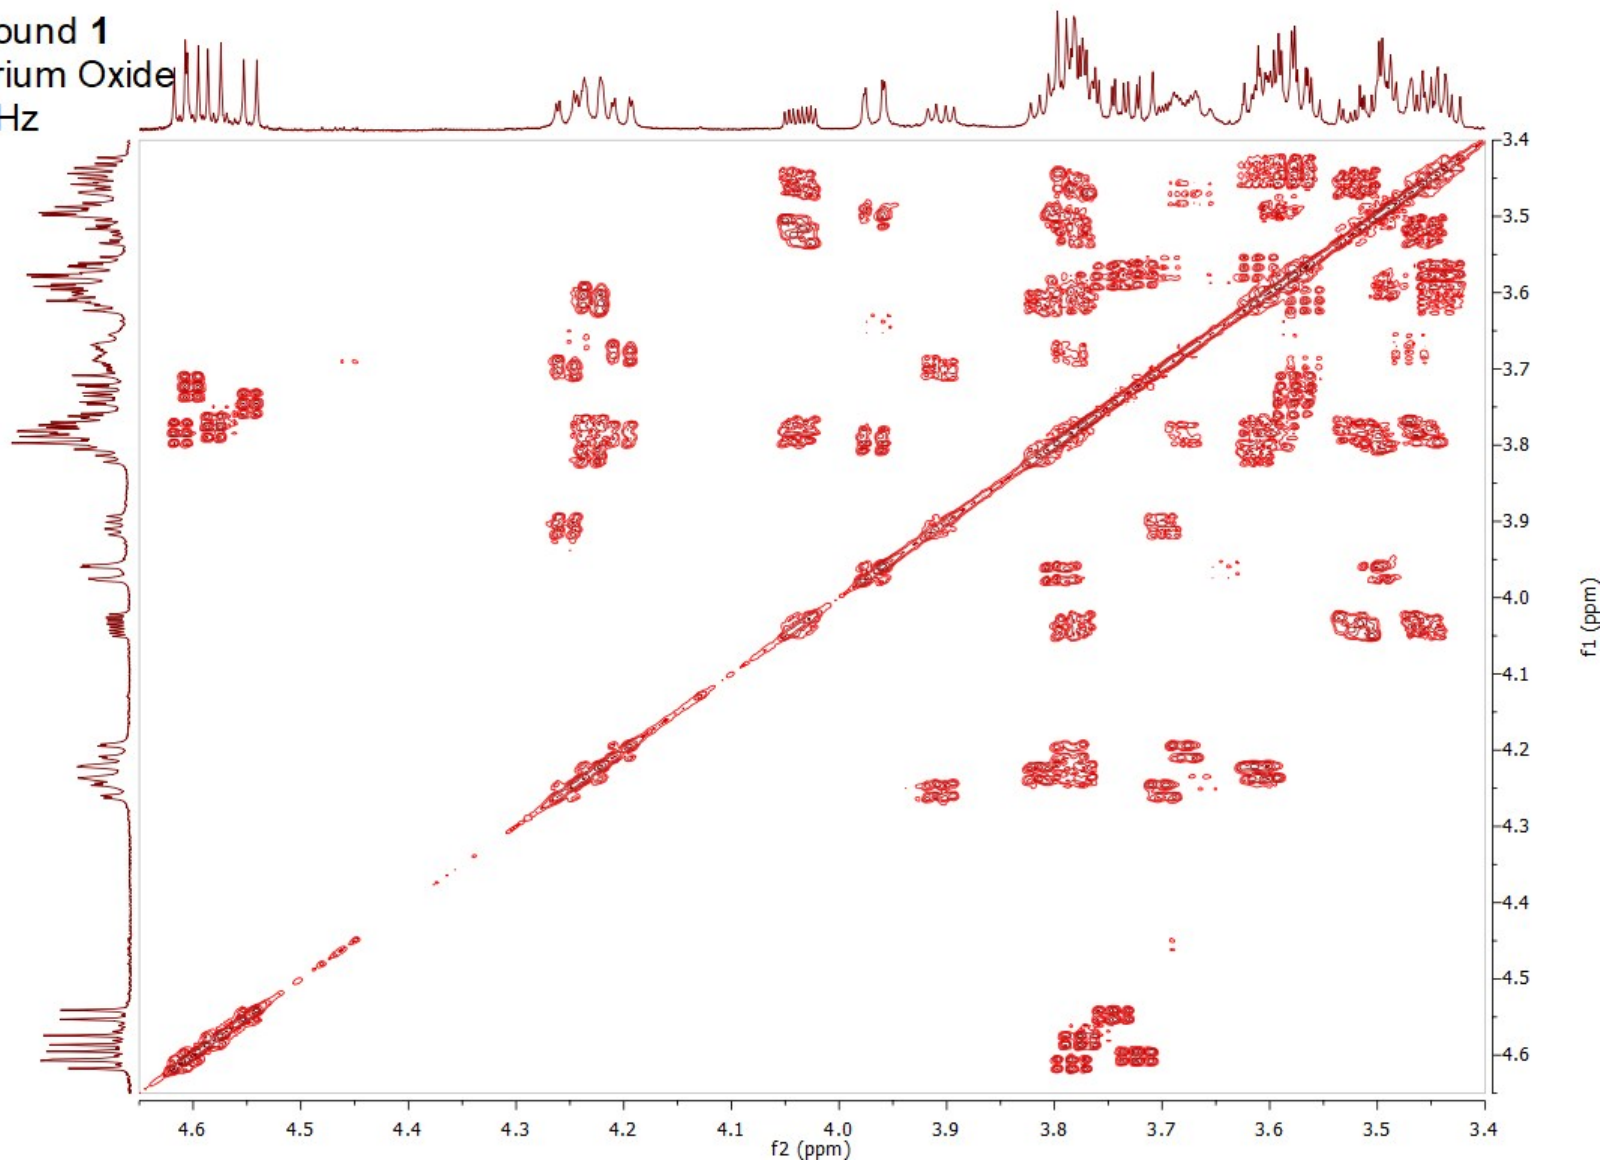



TOCSY  
Compound 1  
Deuterium Oxide  
700 MHz

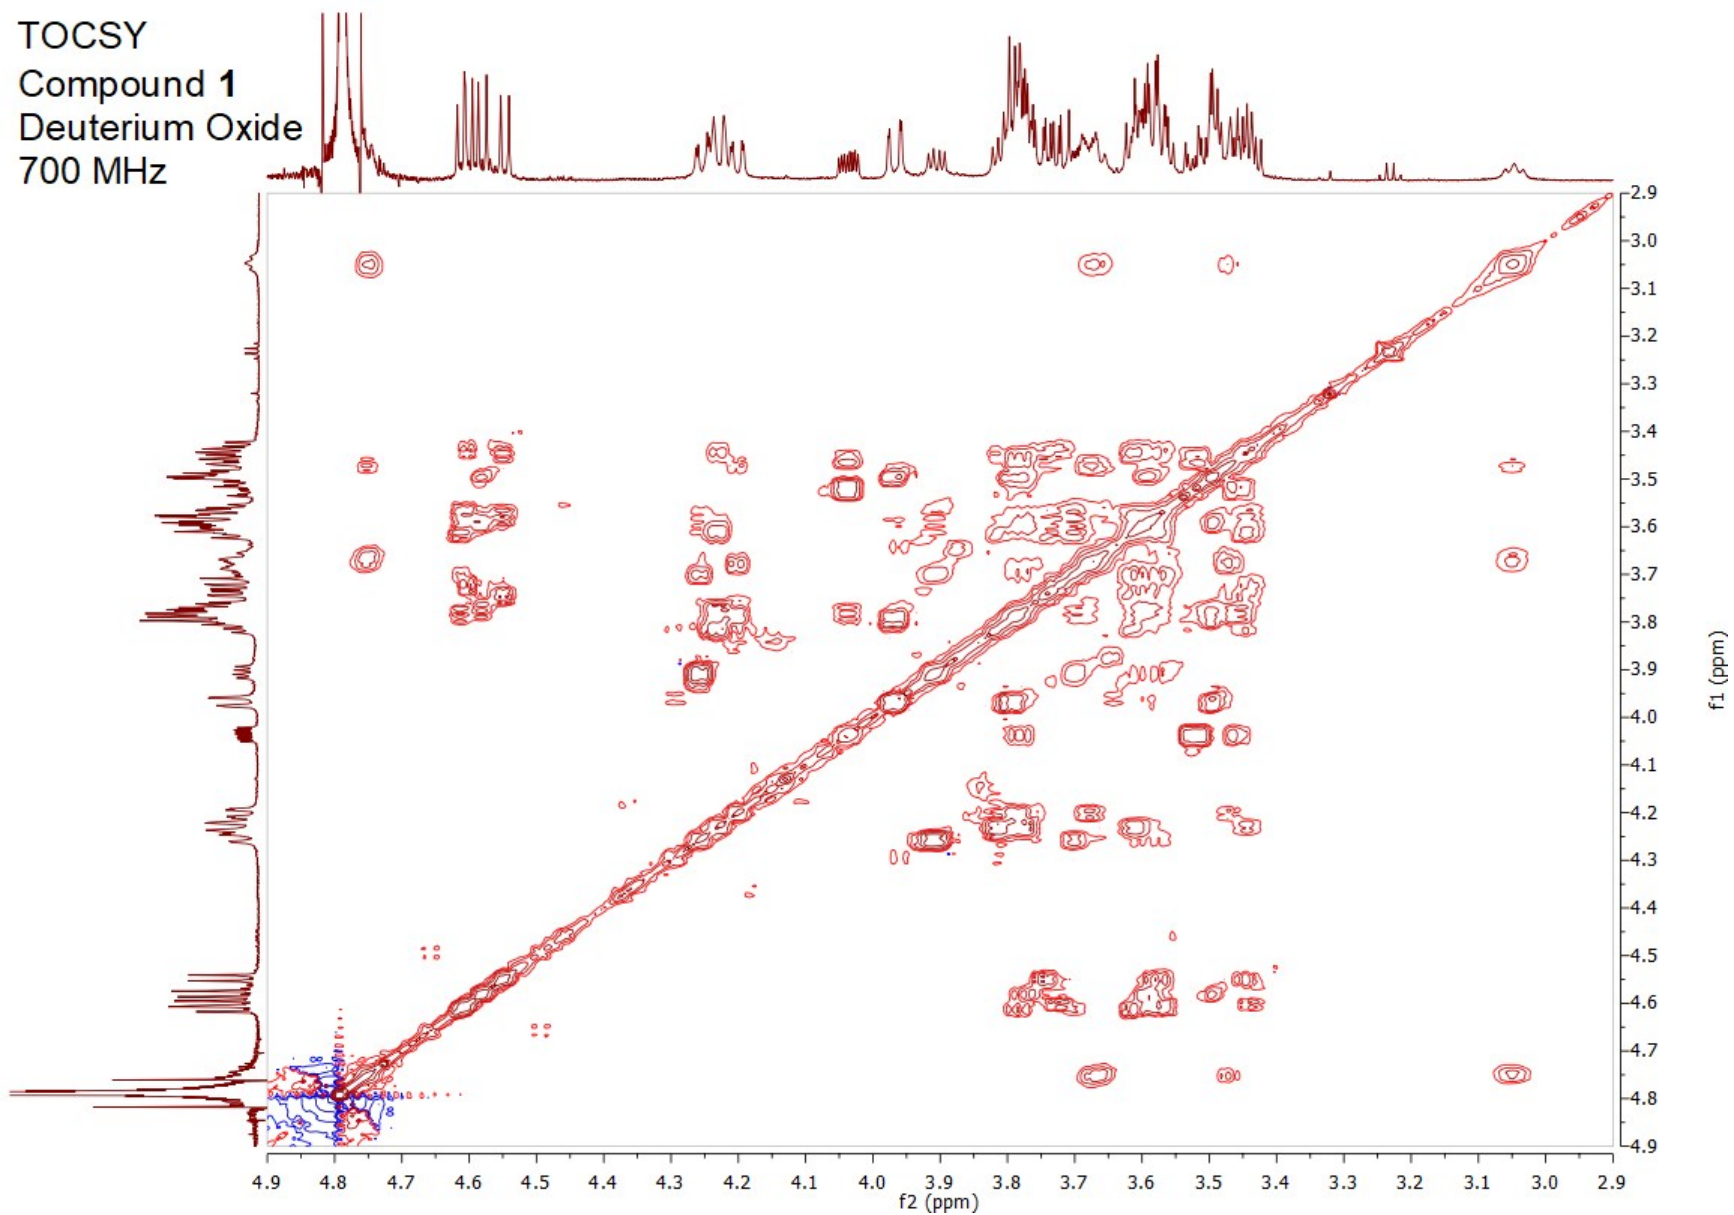

$^{13}\text{C}$ -NMR  
Compound **1**  
Deuterium Oxide  
125 MHz

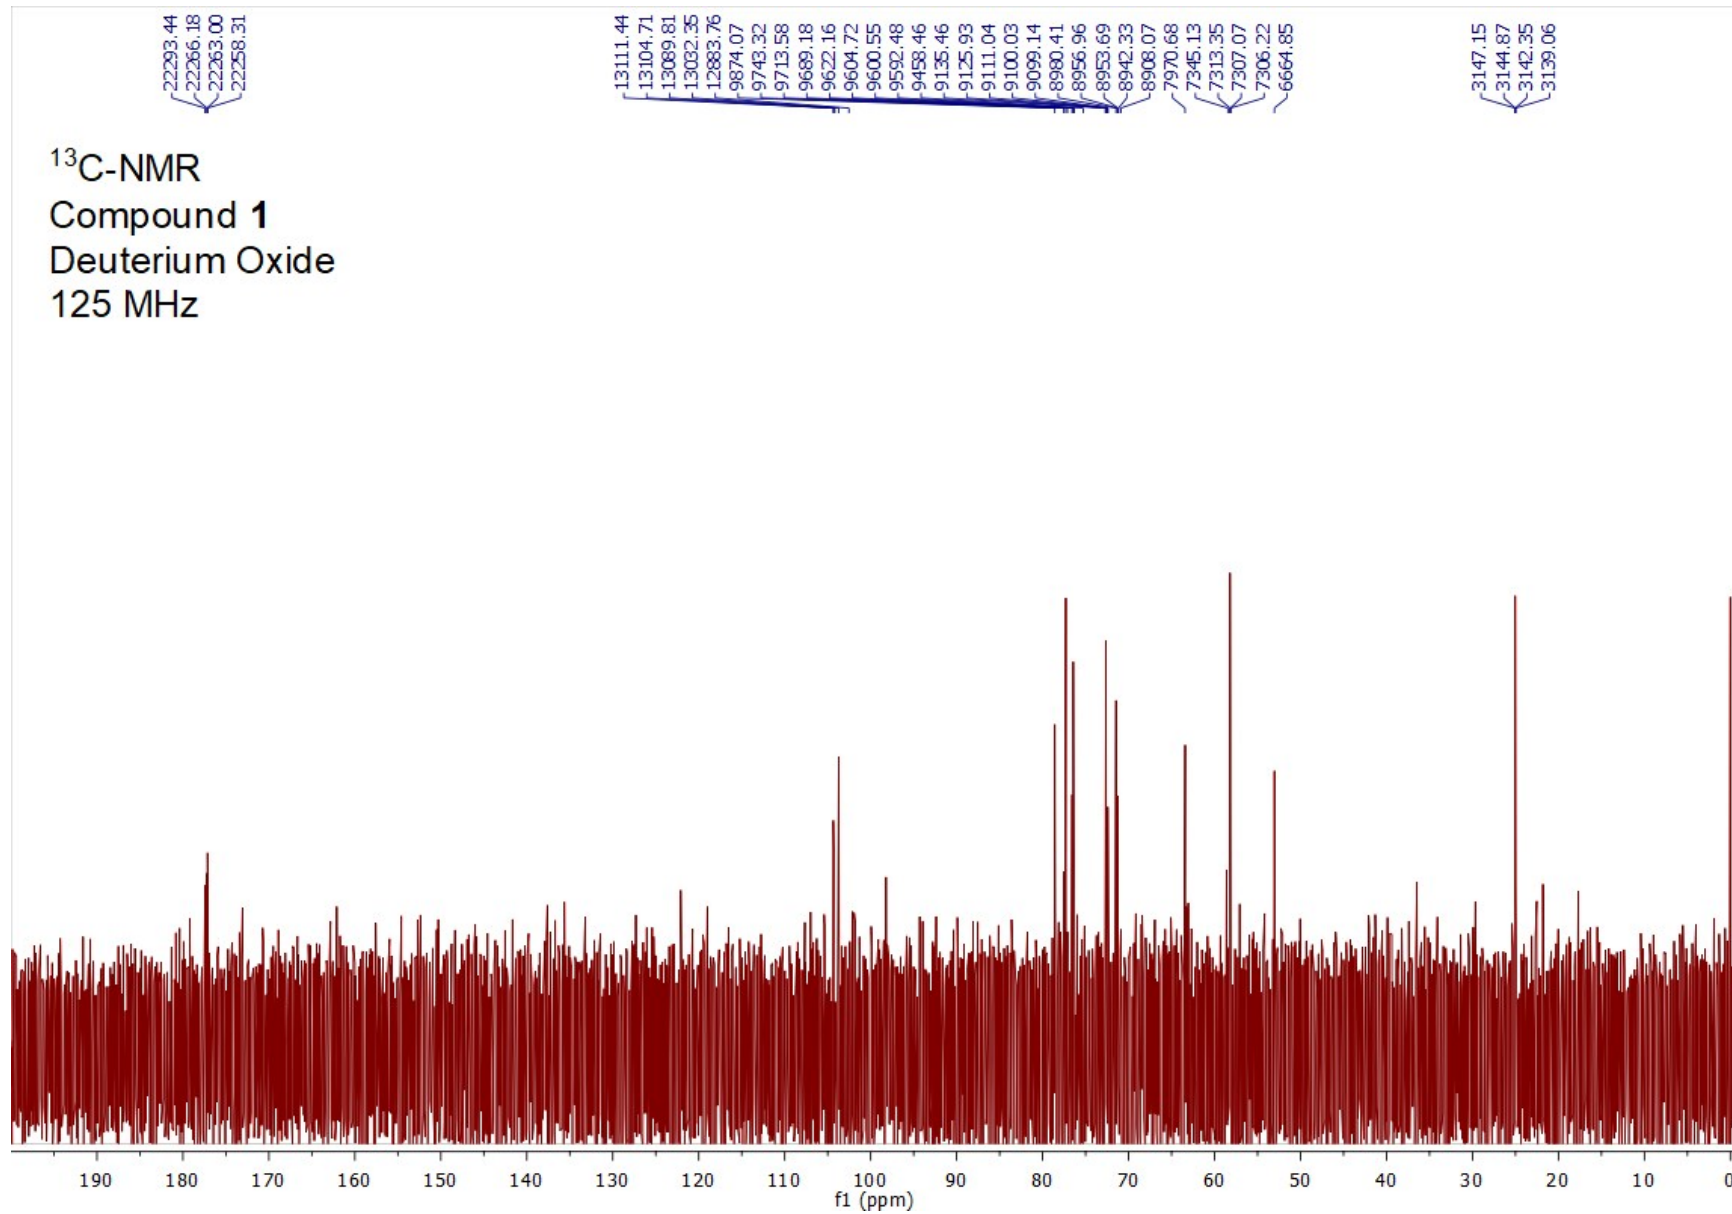

HSQC  
Compound 1  
Deuterium Oxide  
700 MHz

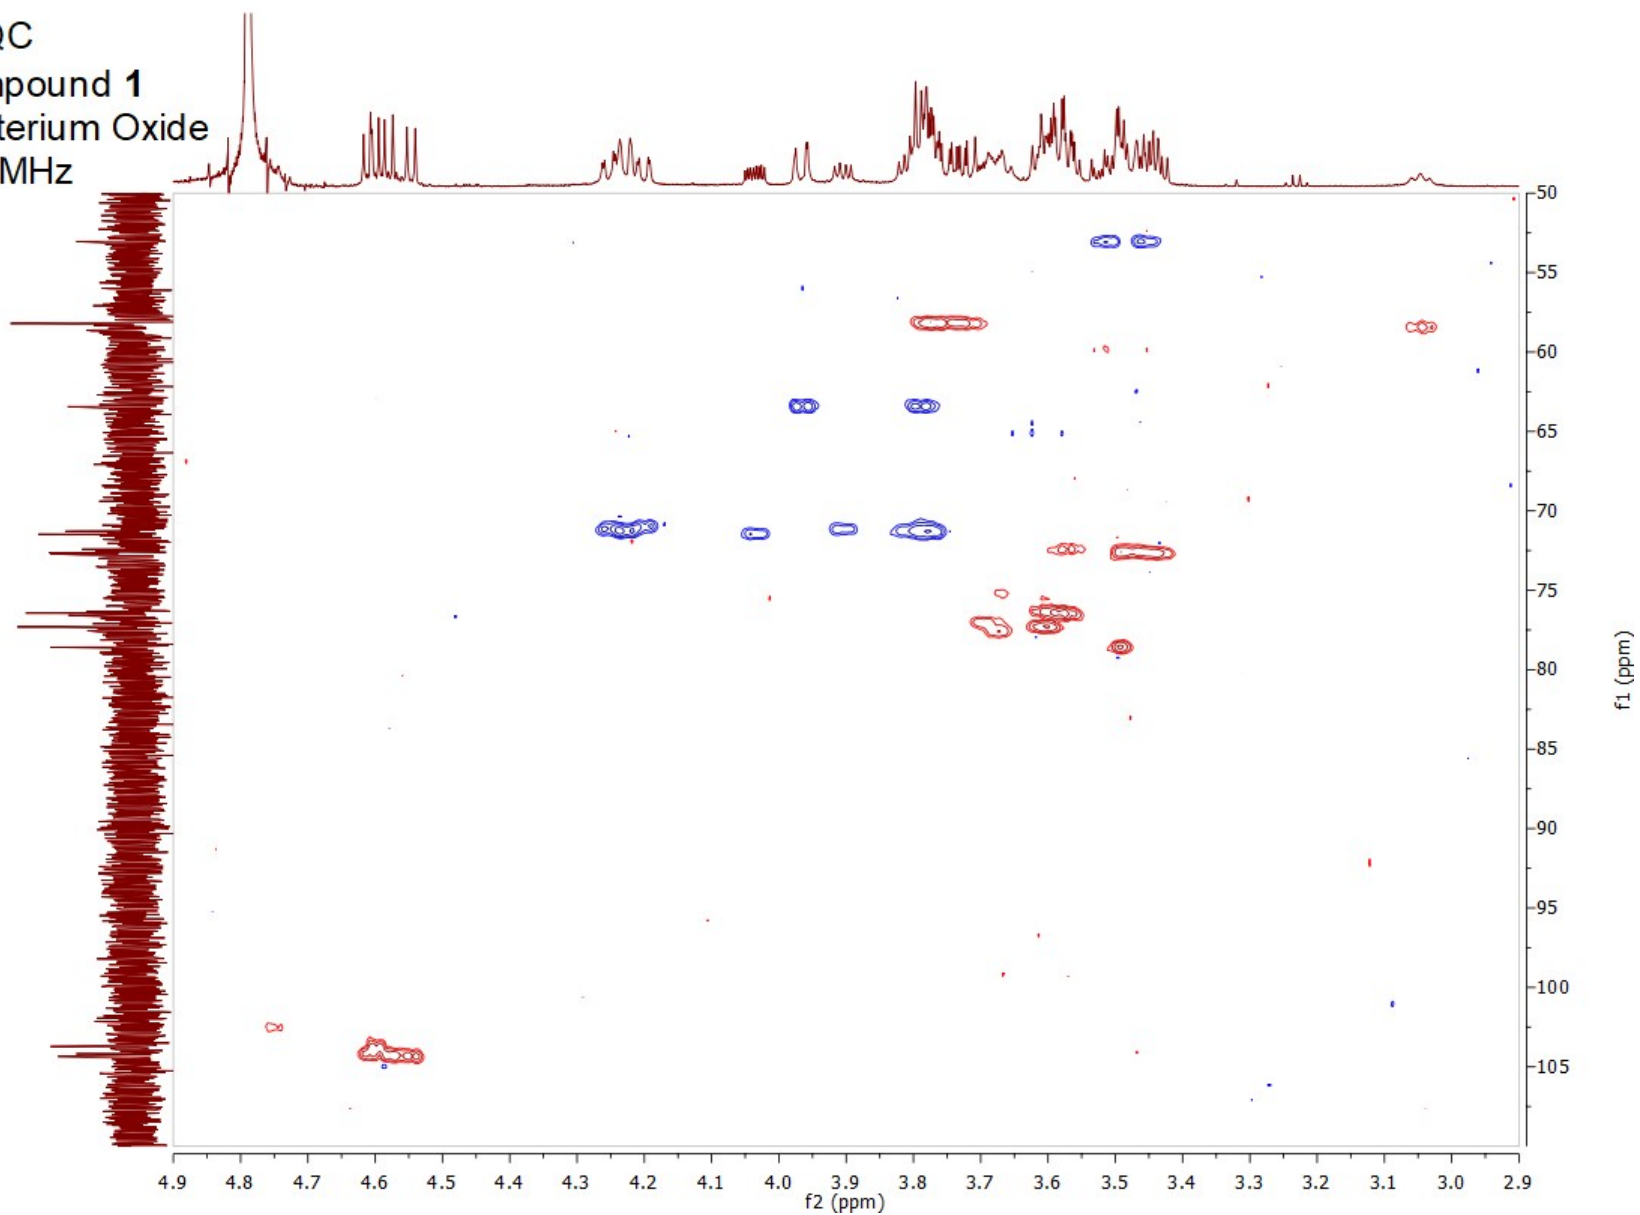



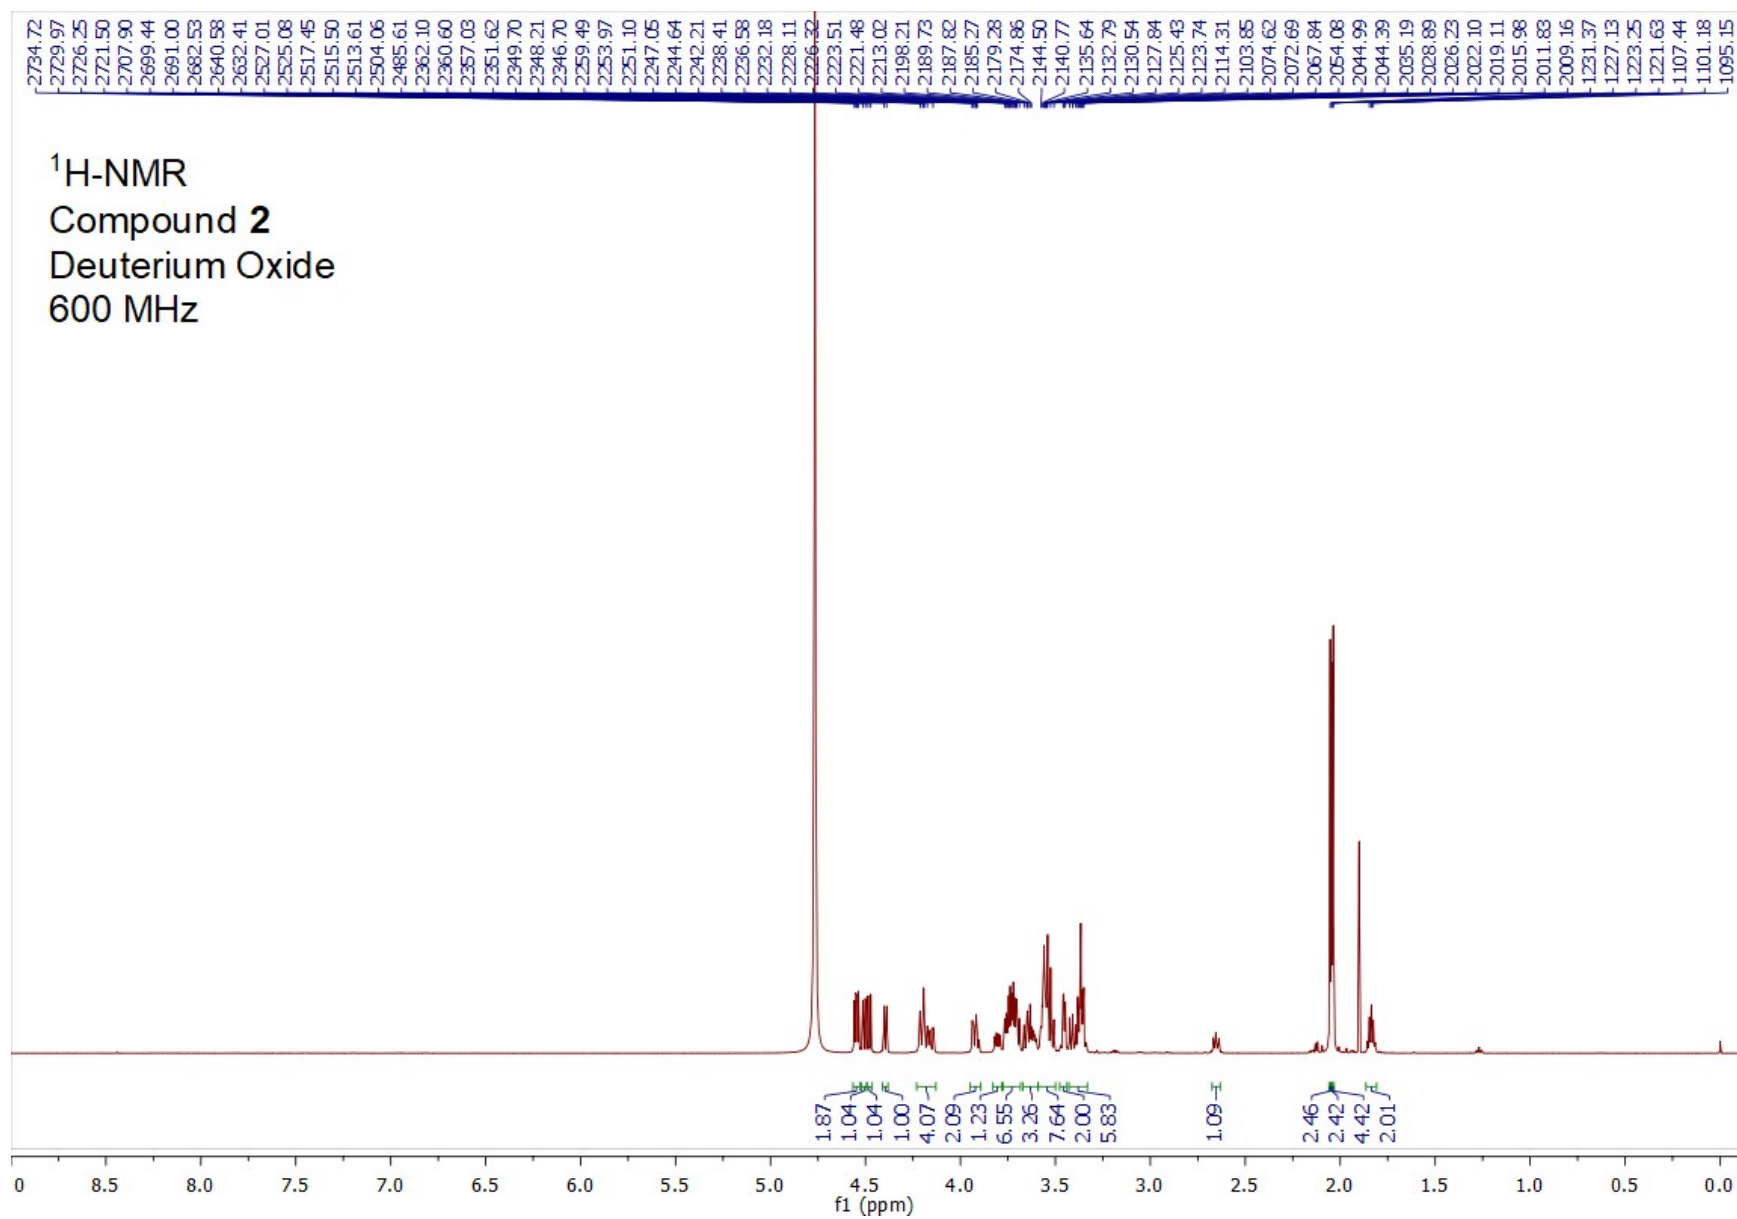

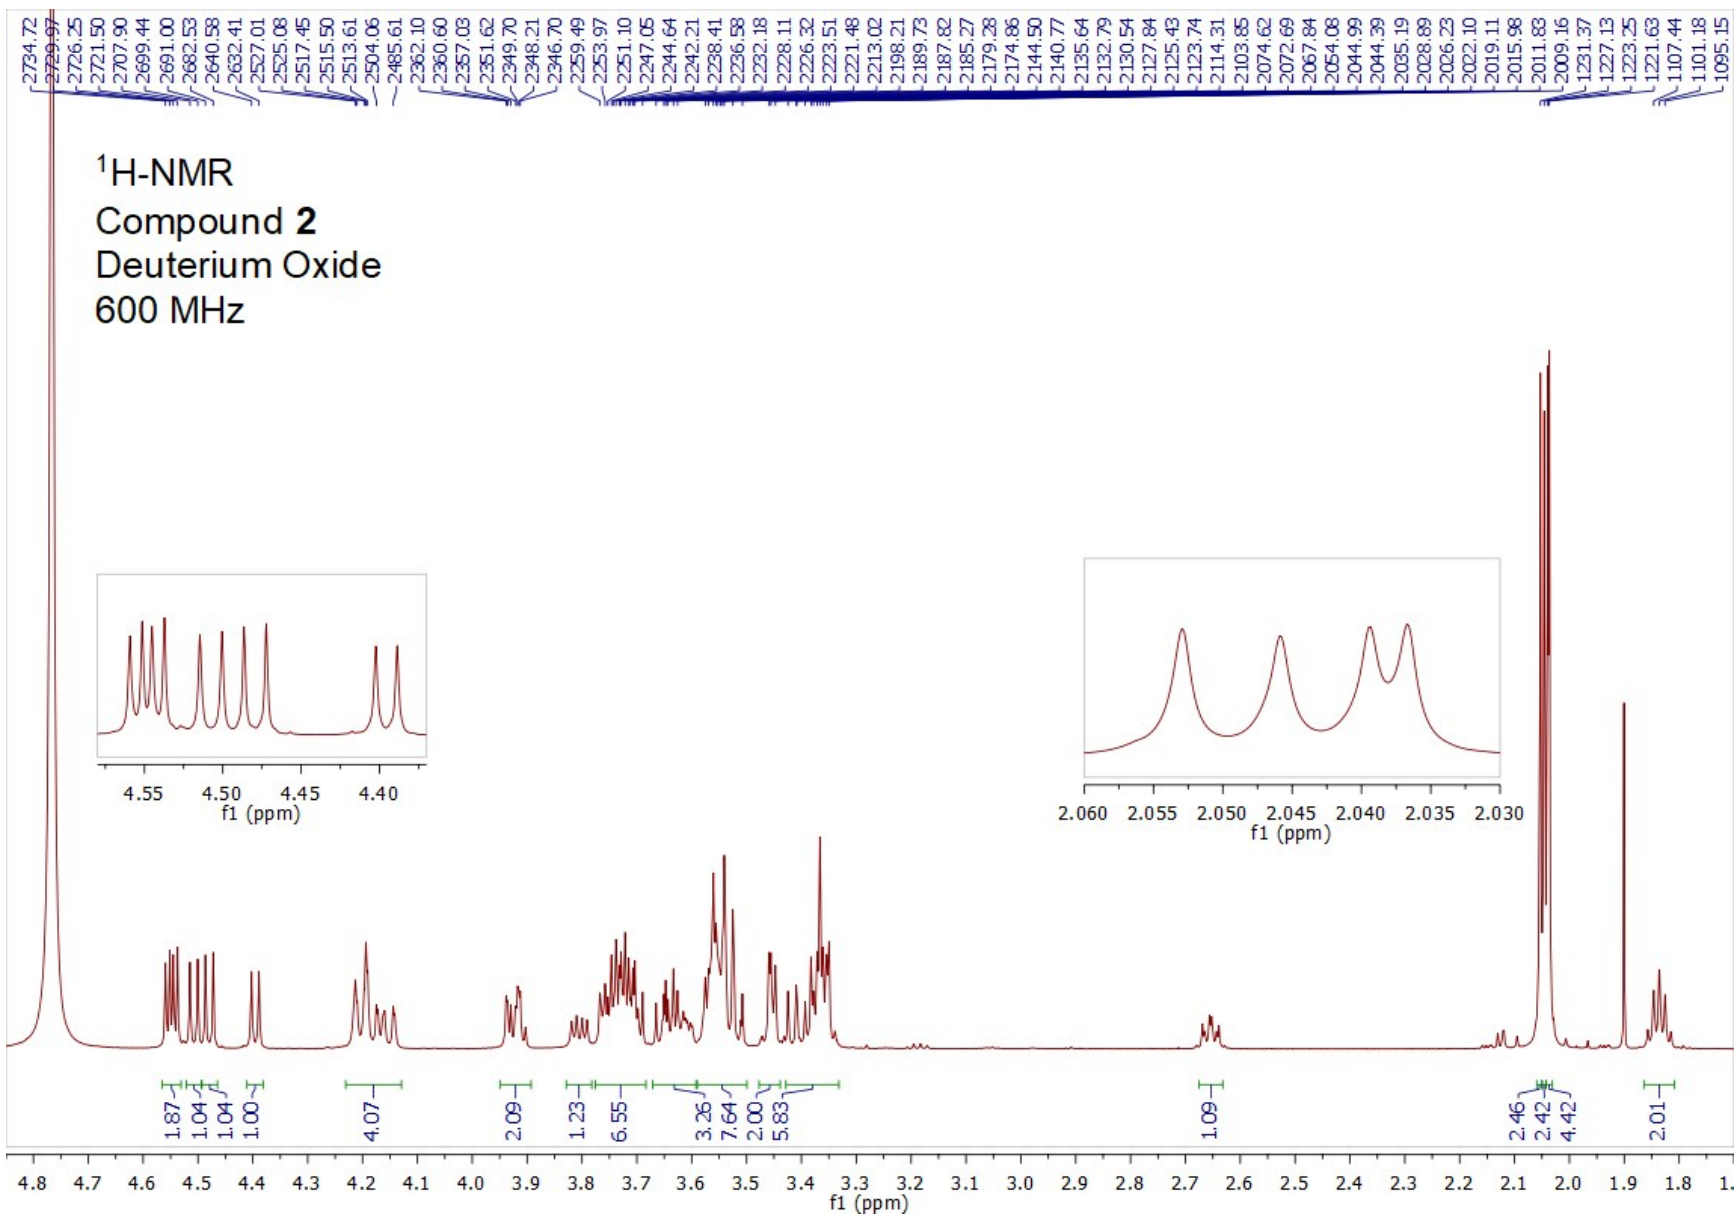

COSY  
Compound 2  
Deuterium Oxide  
600 MHz

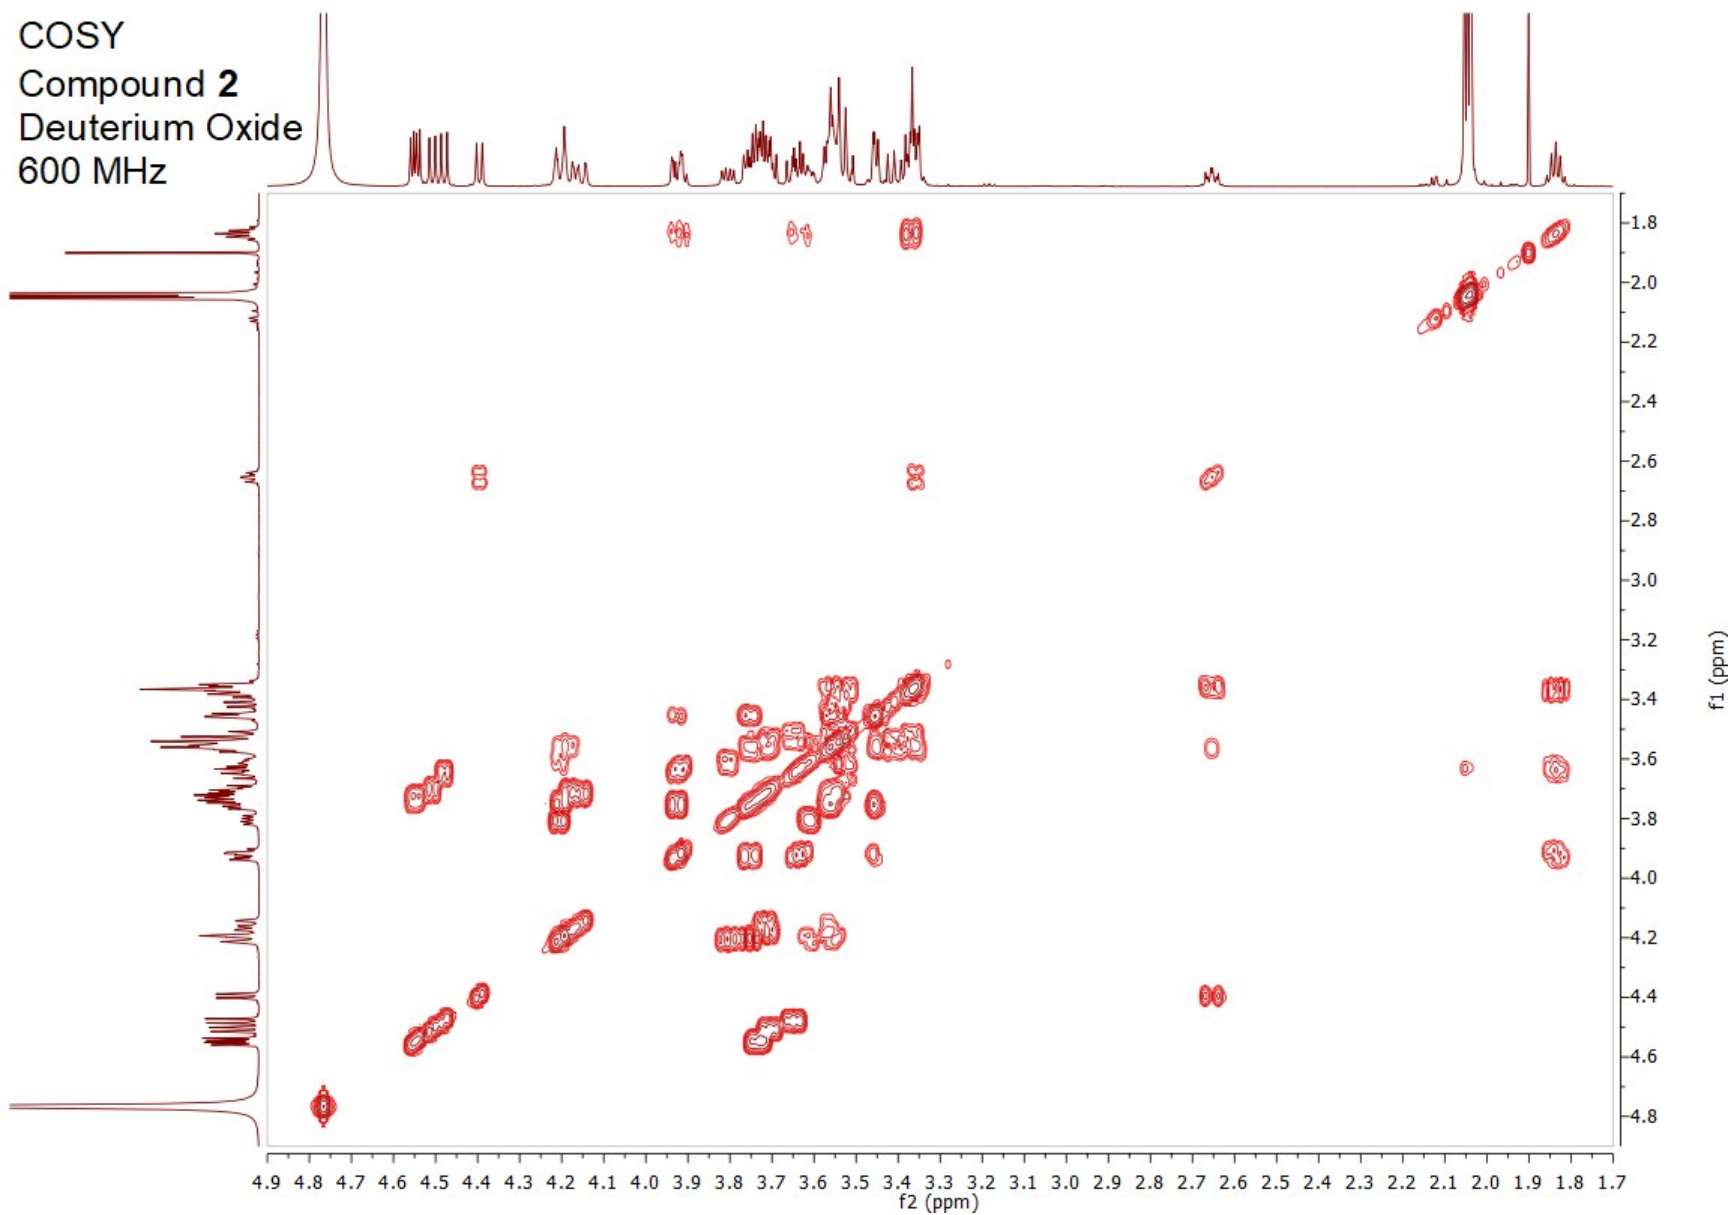

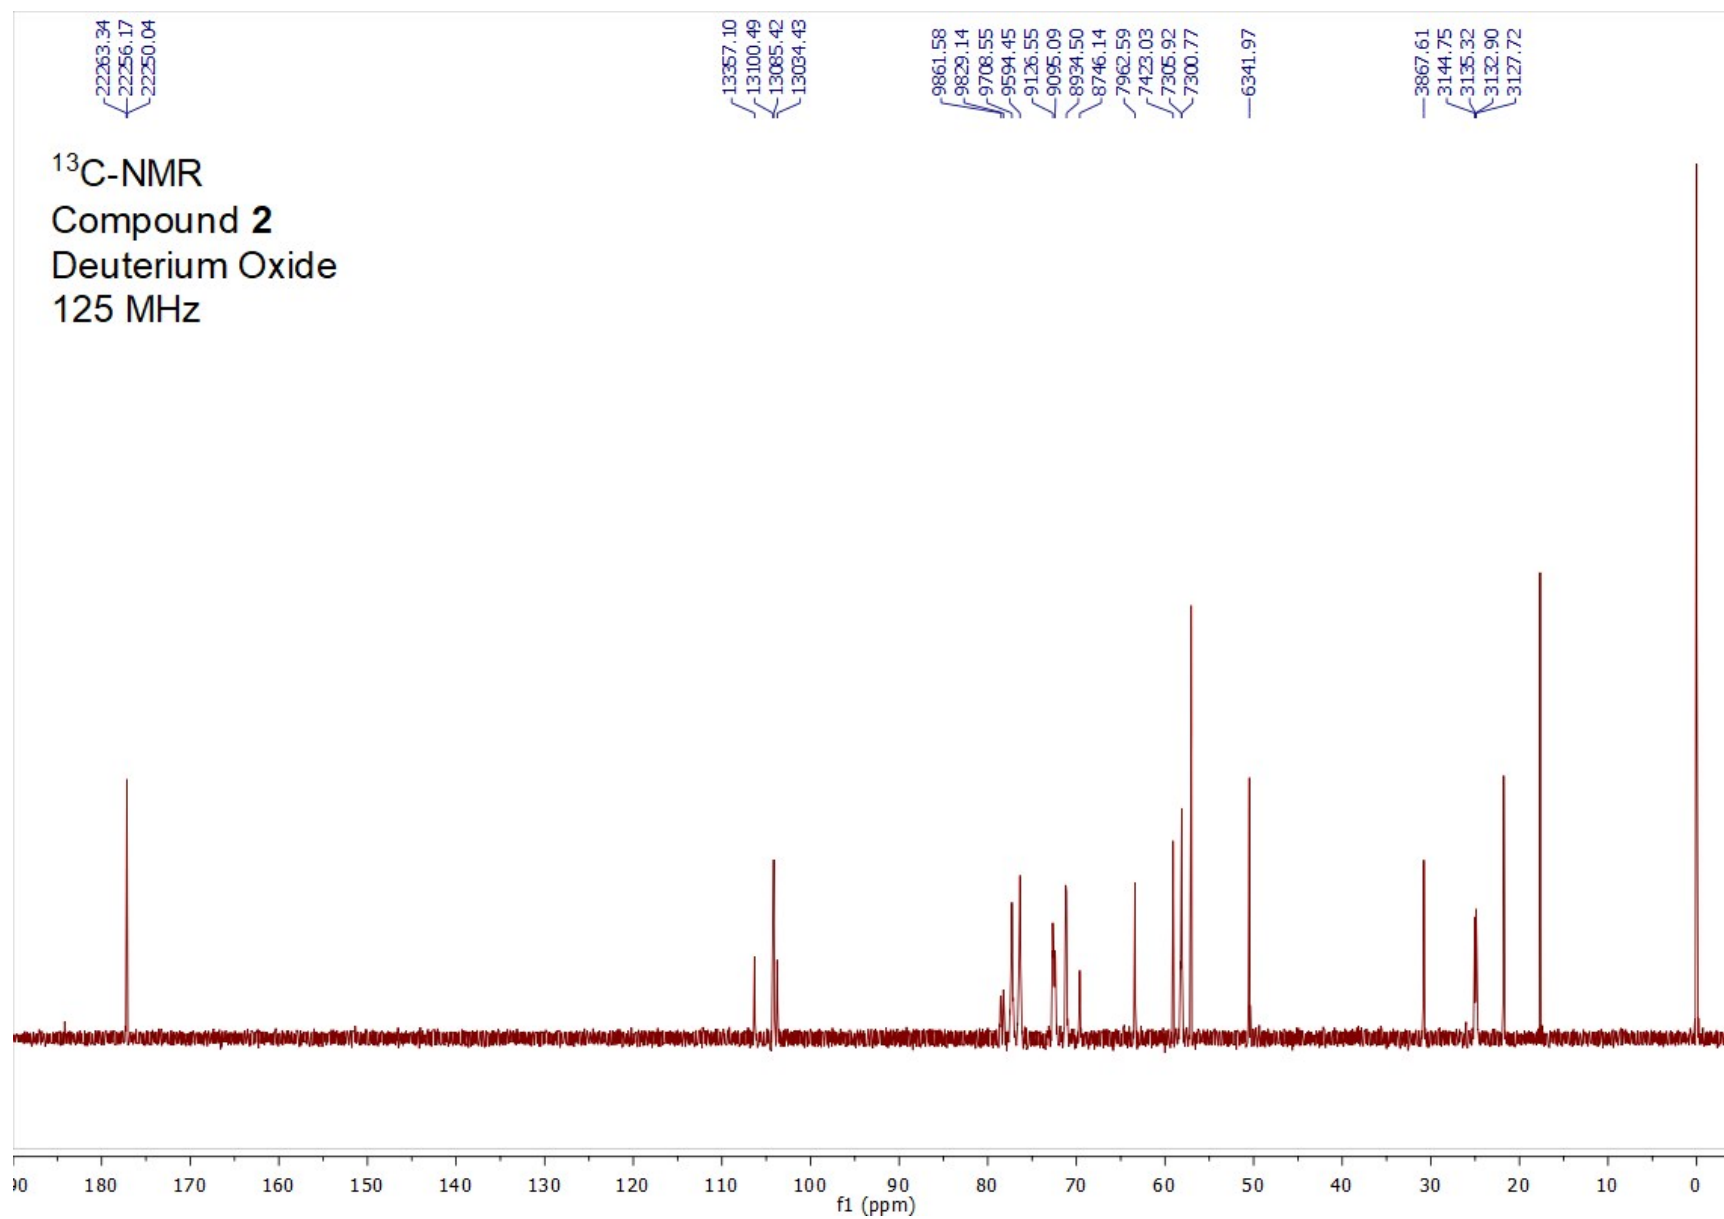

HSQC  
Compound 2  
Deuterium Oxide  
600 MHz

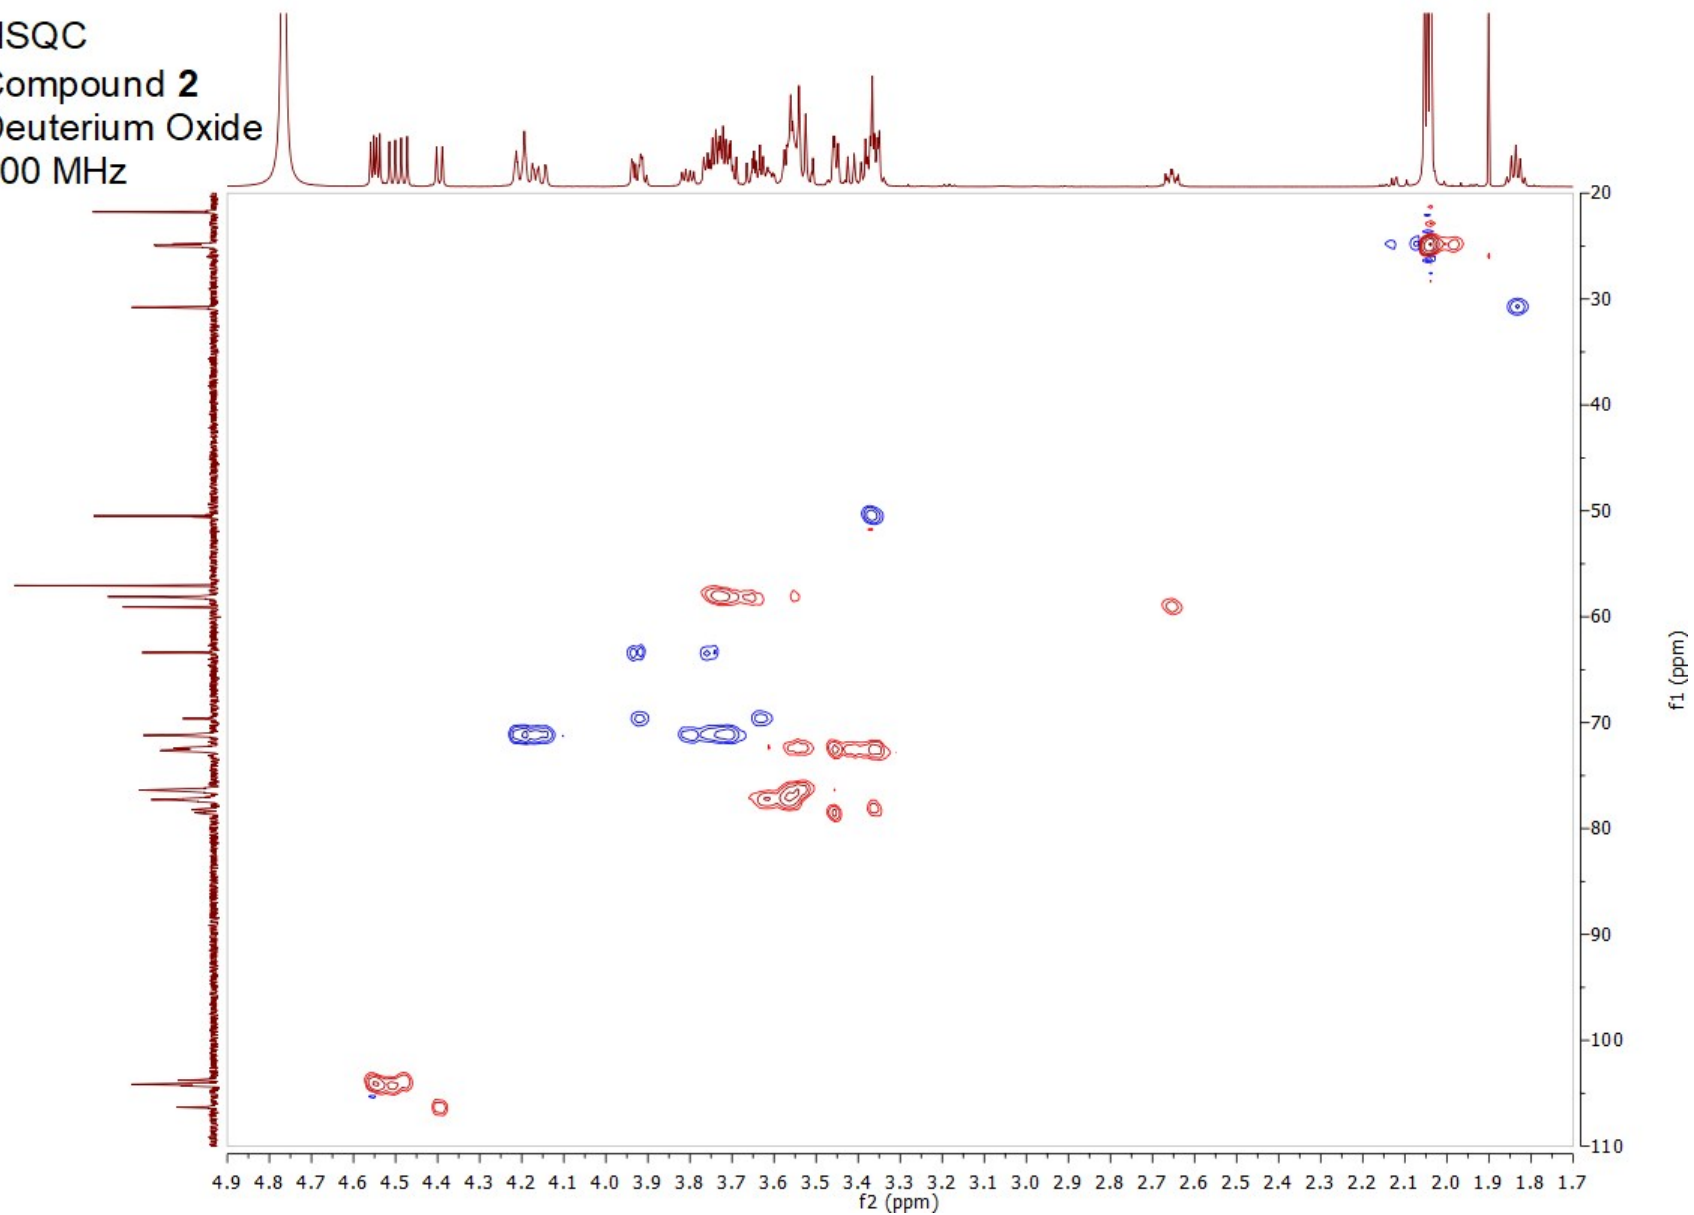

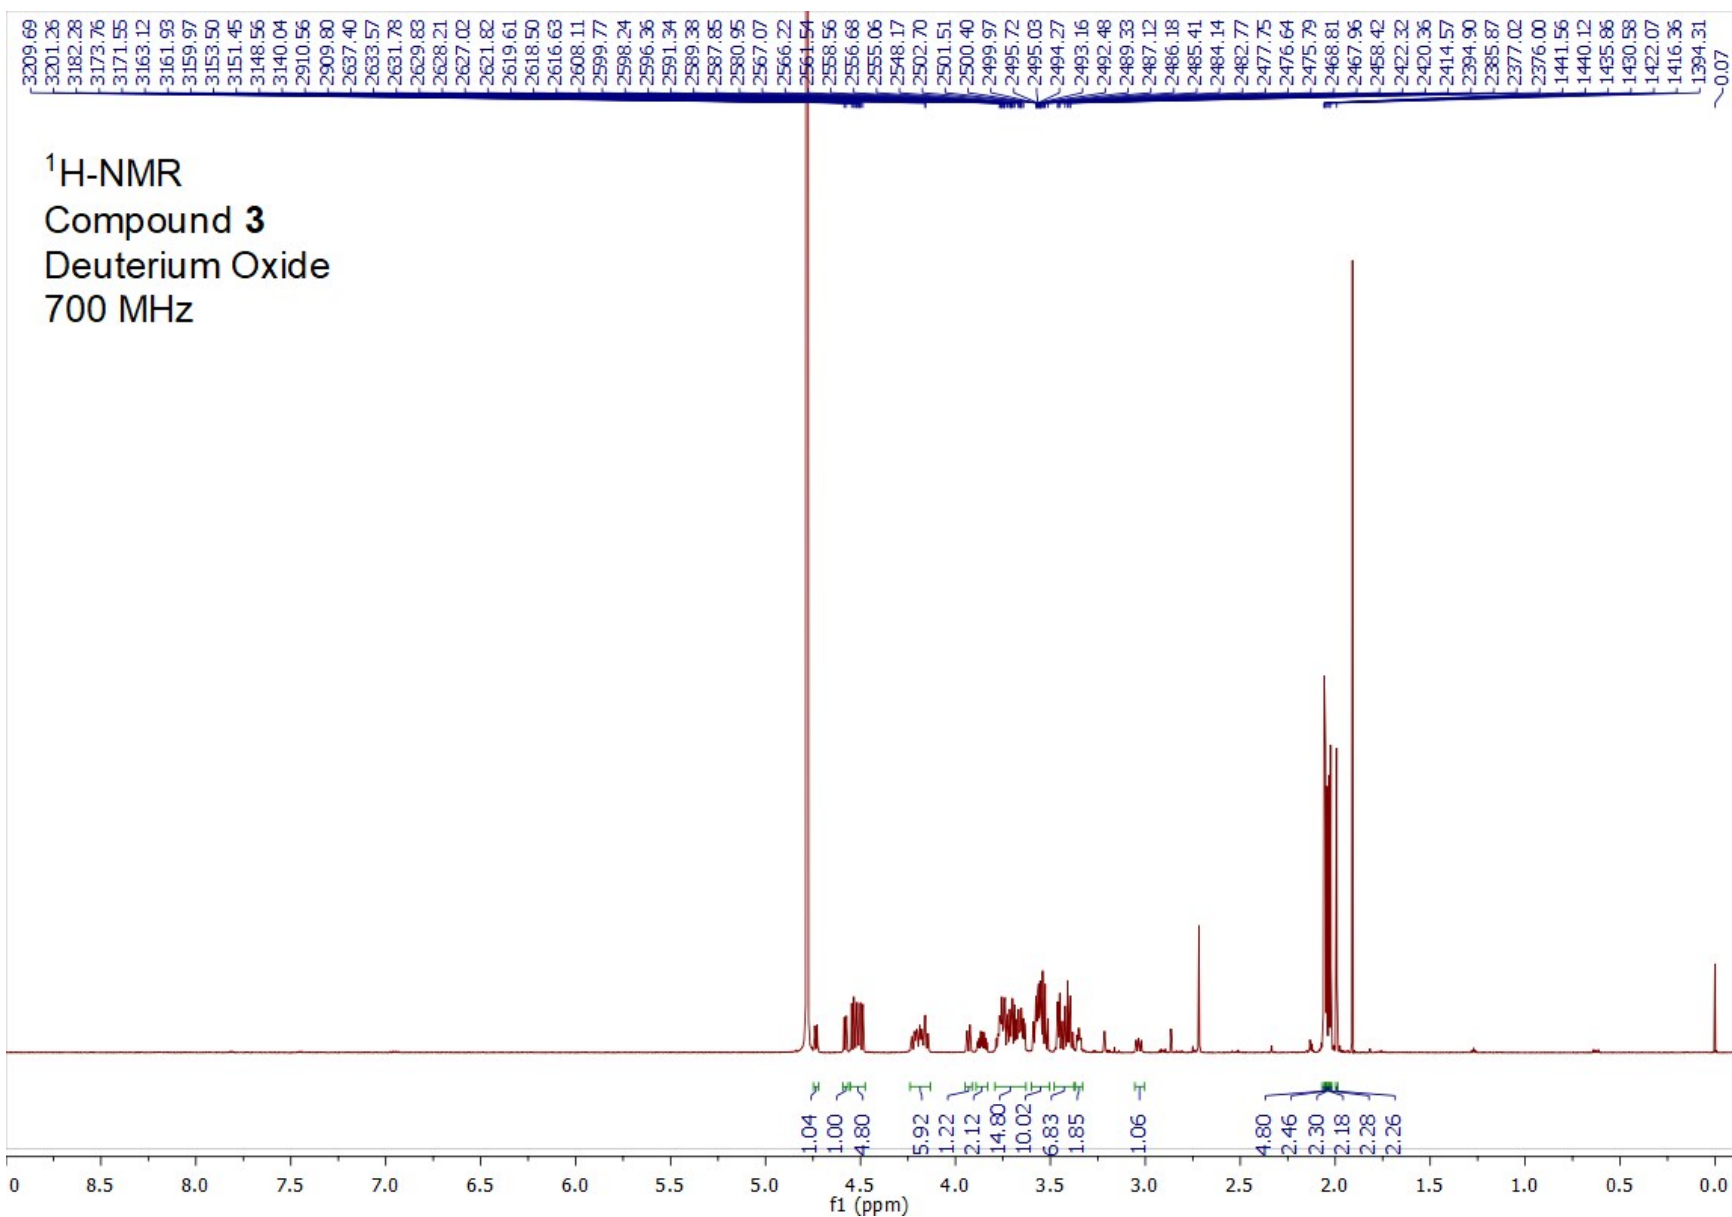



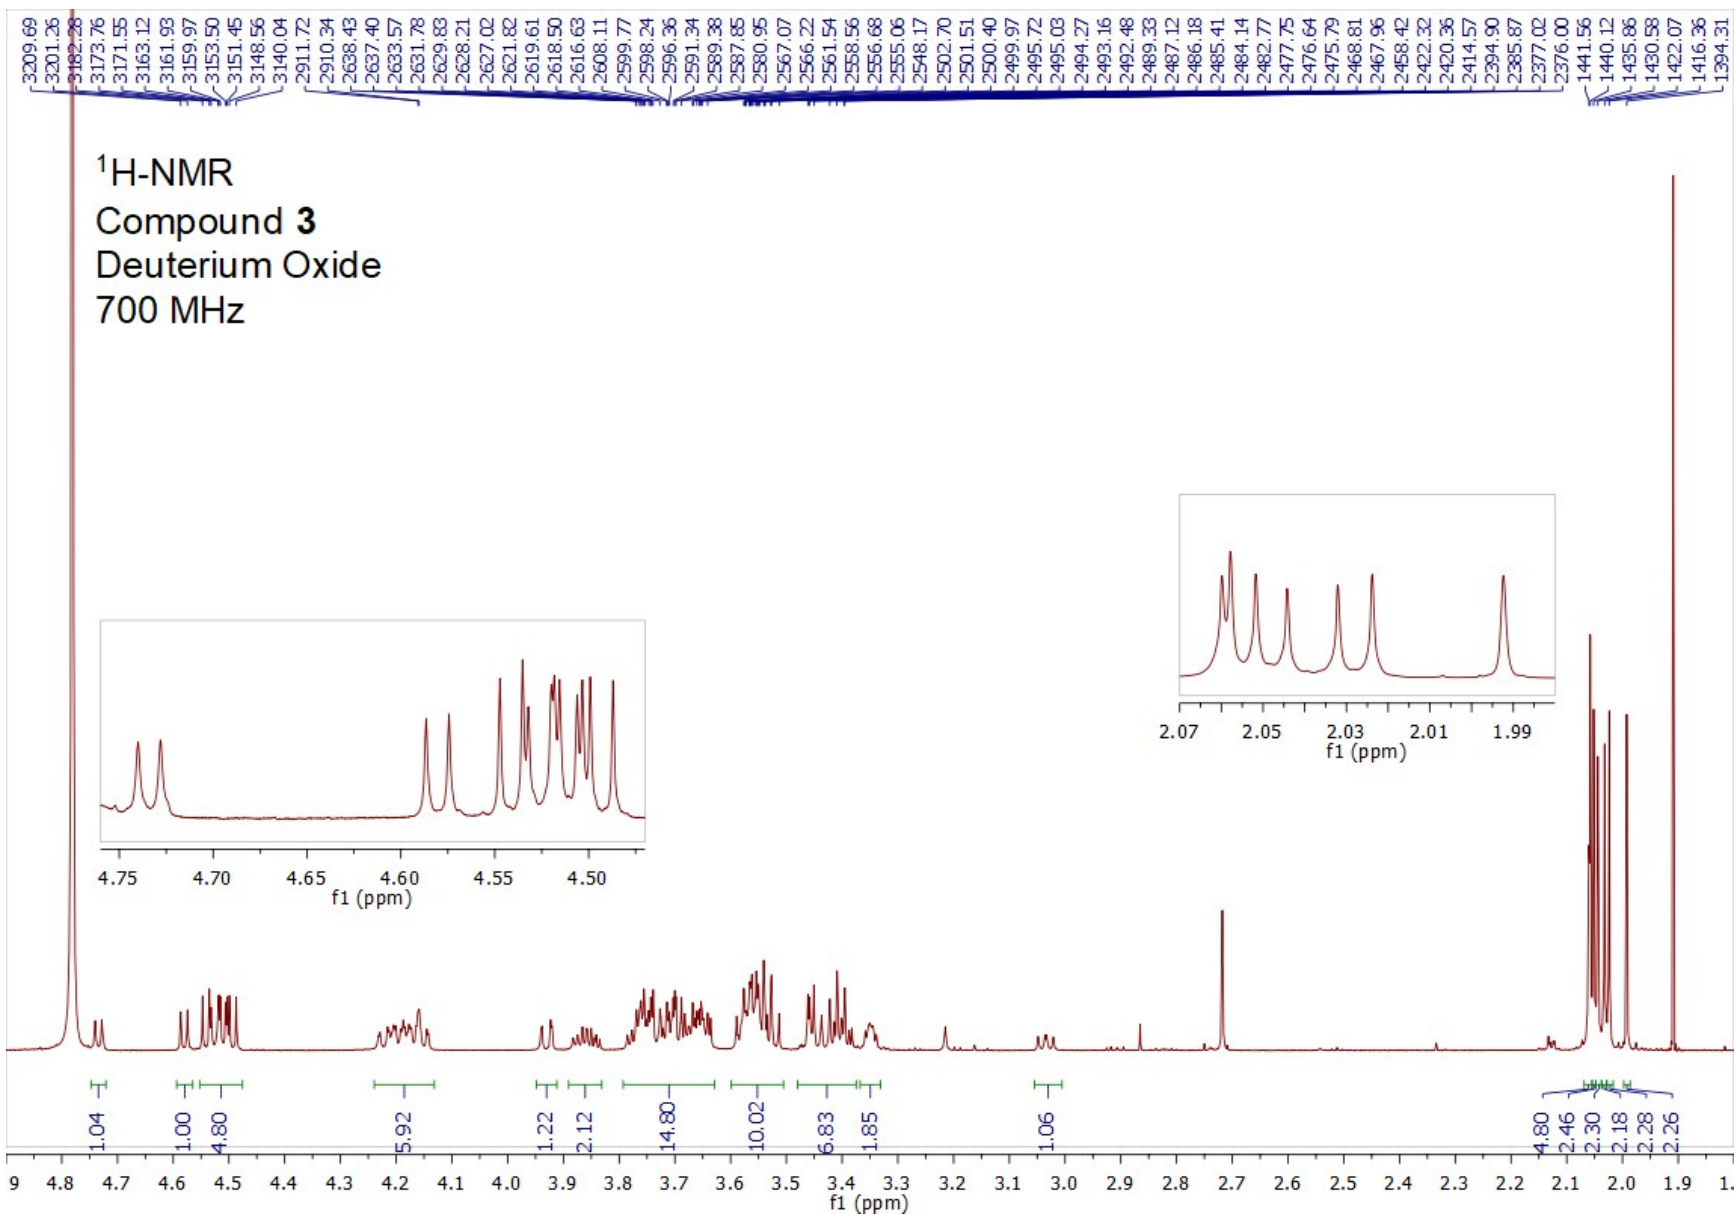

COSY  
Compound 3  
Deuterium Oxide  
700 MHz

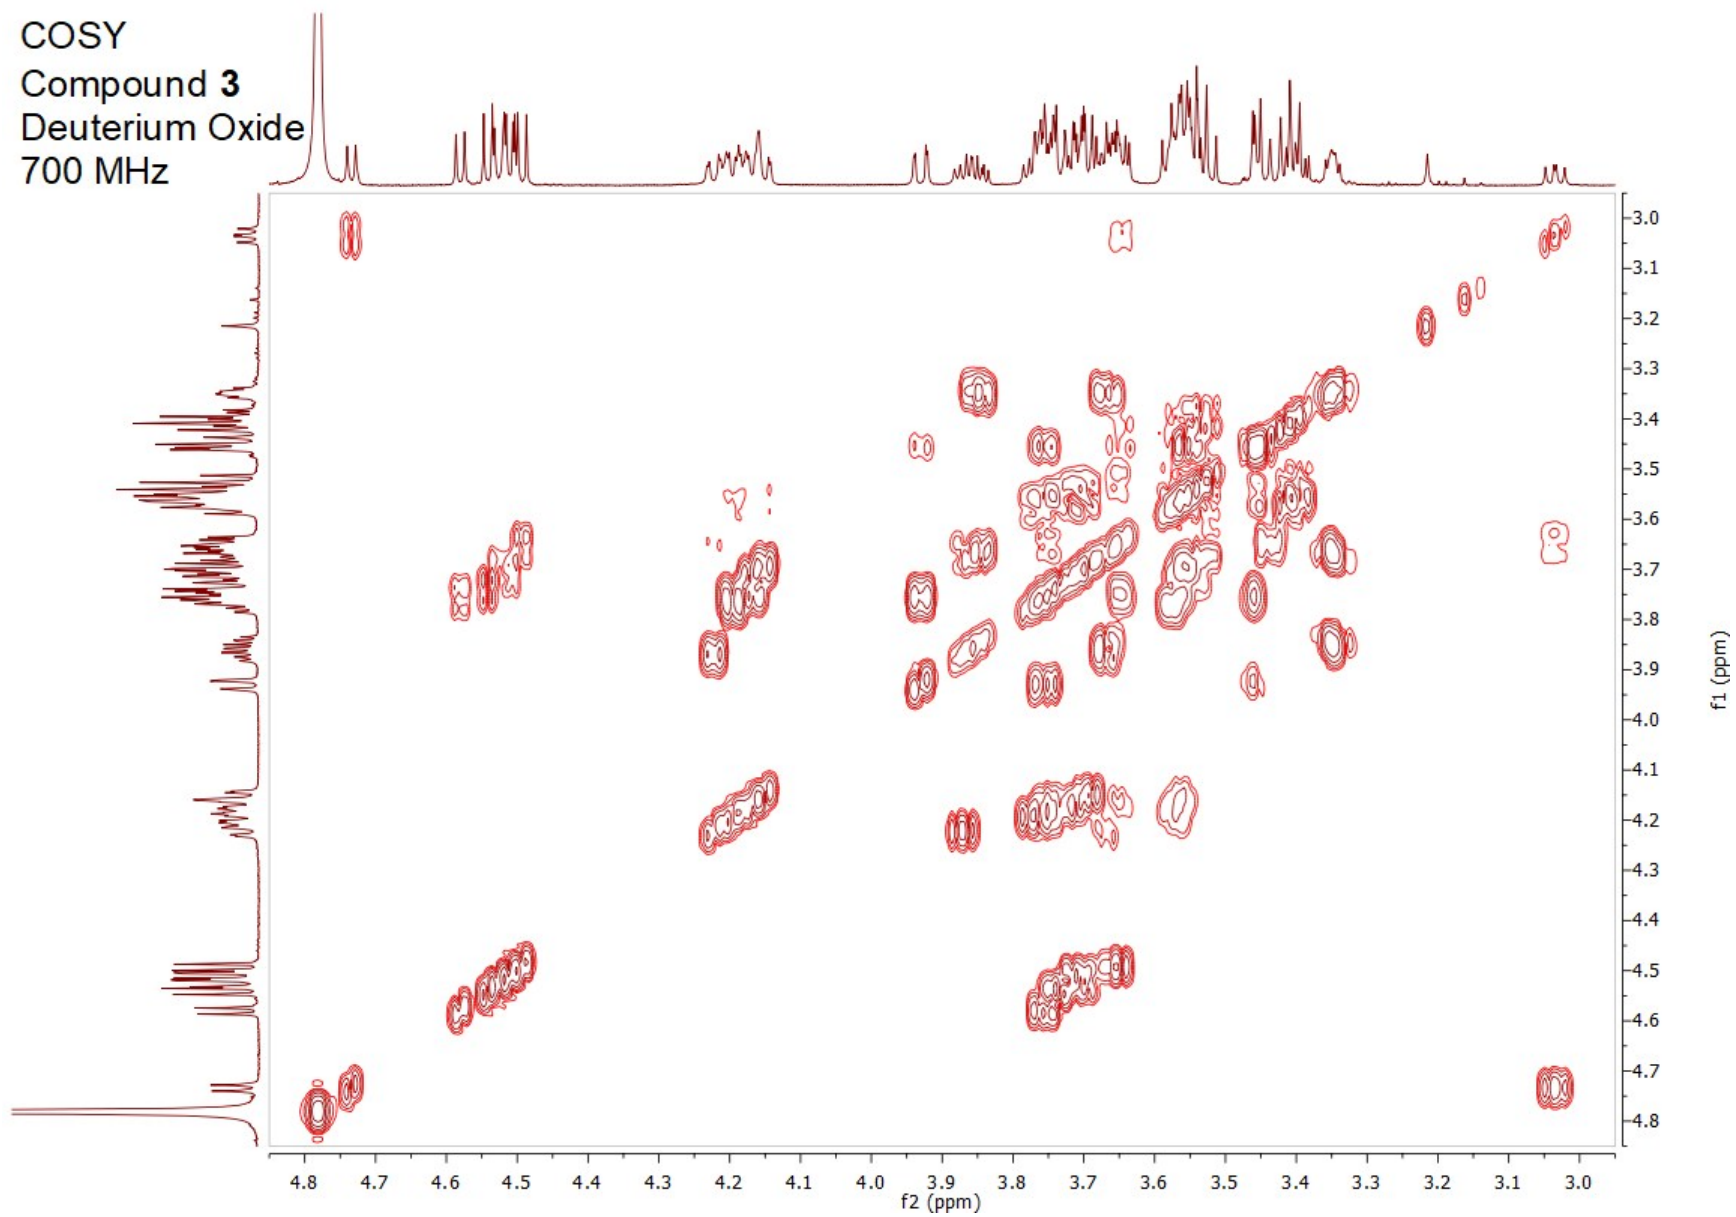



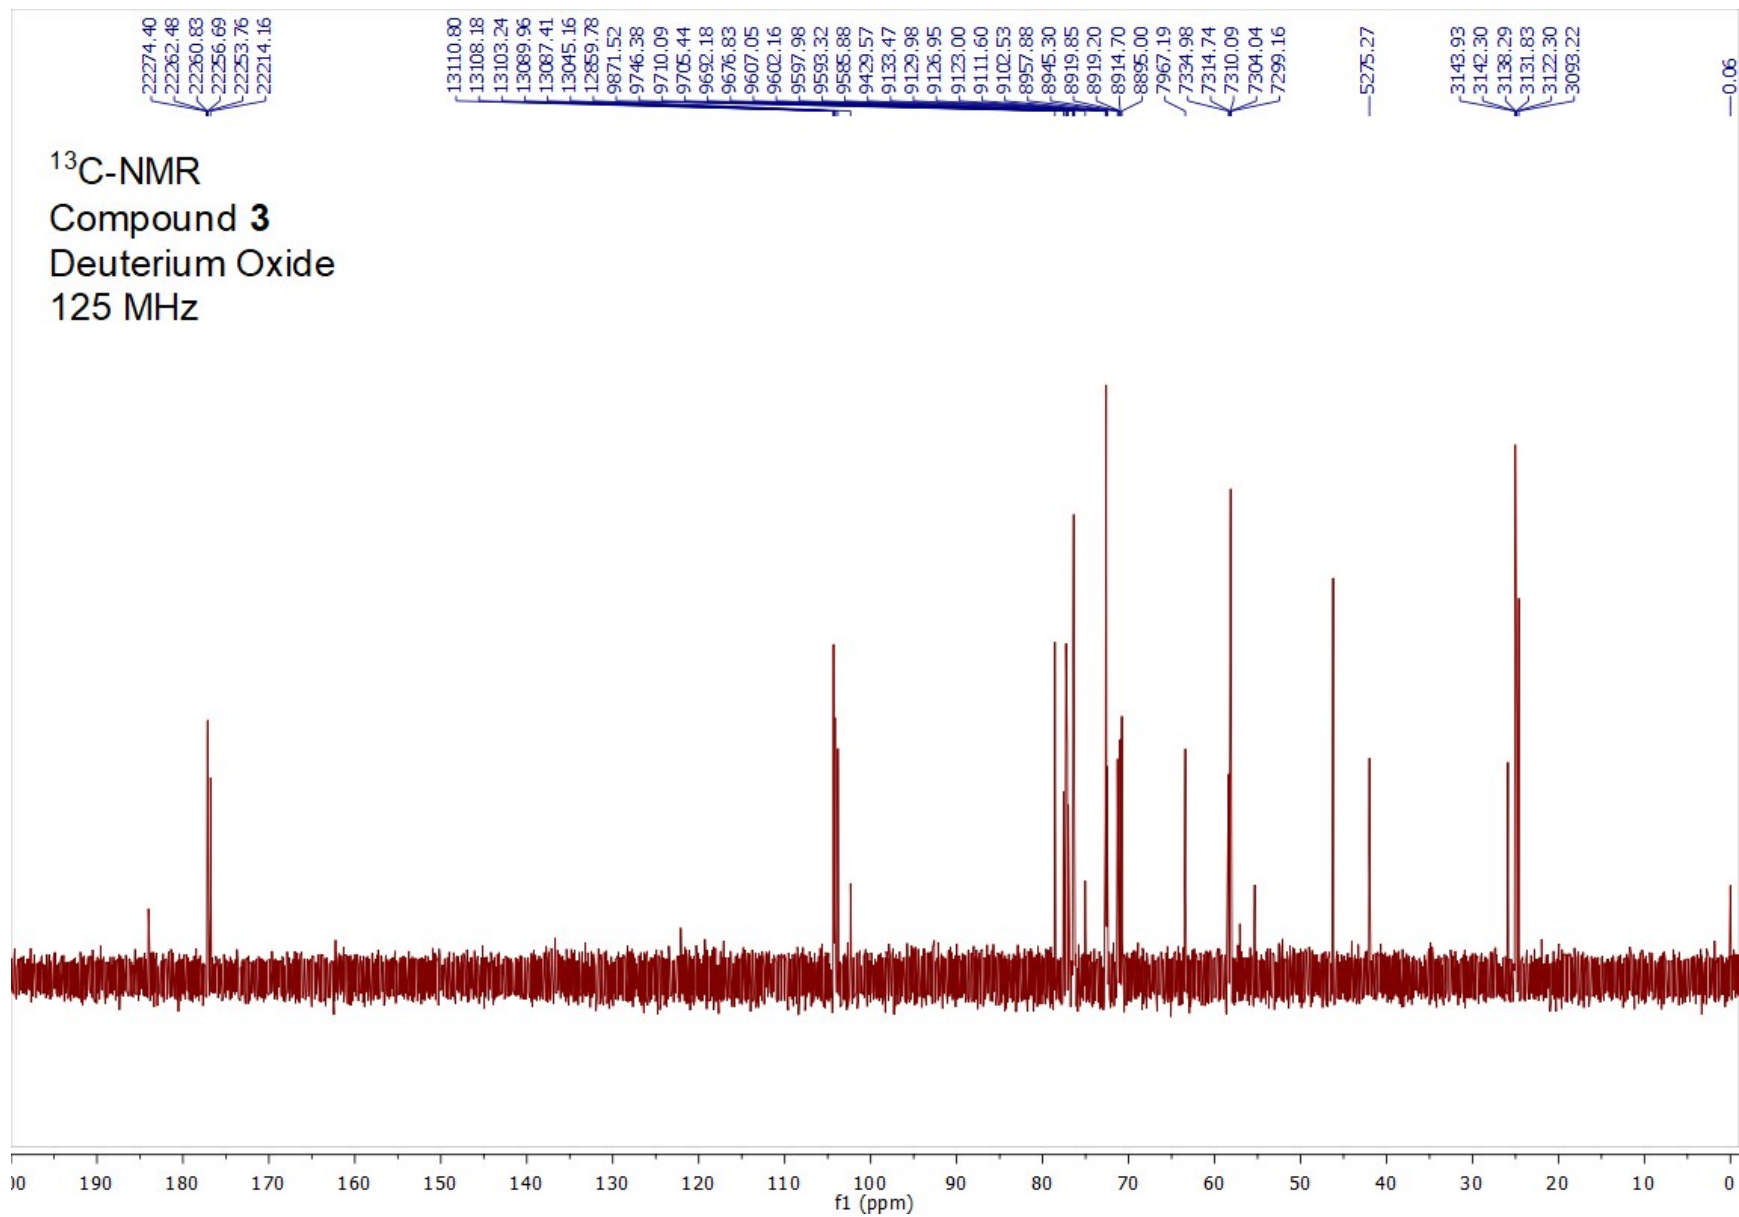

HSQC  
Compound 3  
Deuterium Oxide  
700 MHz

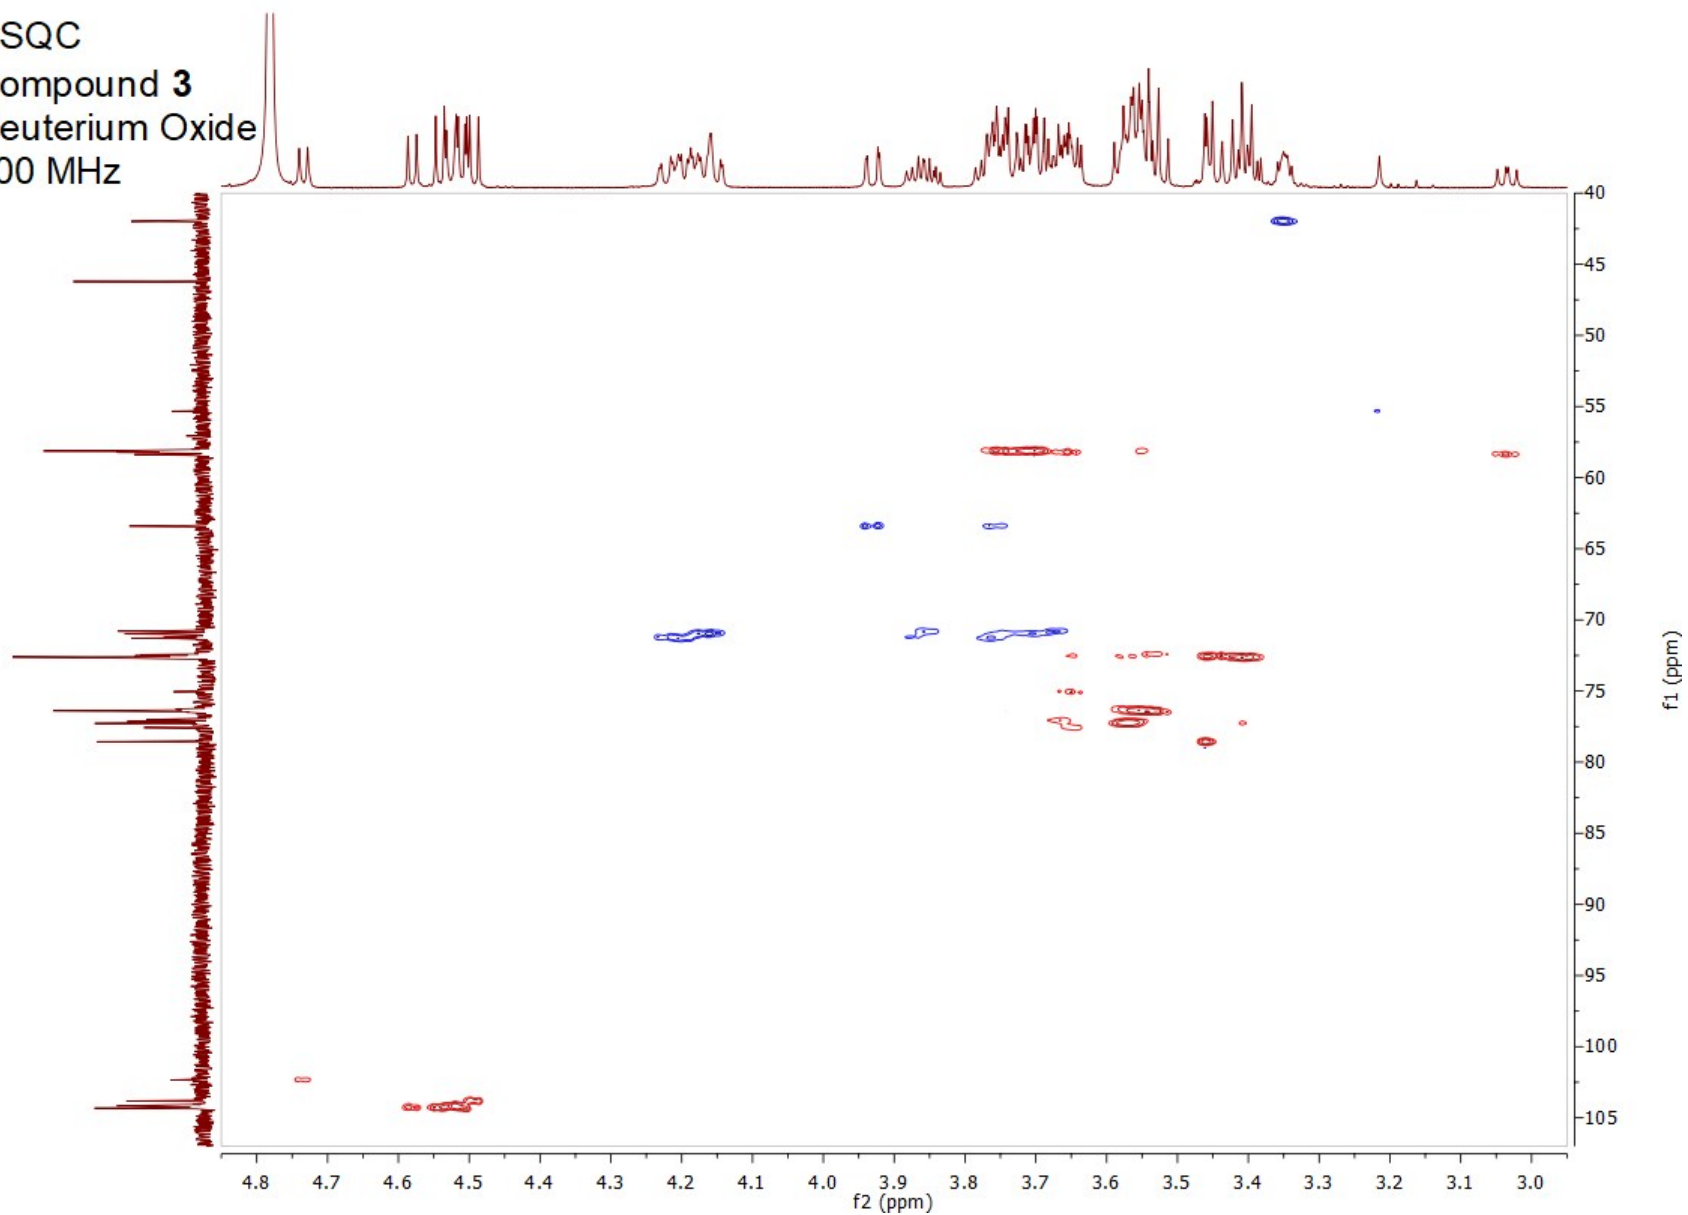



HMBC  
Compound 3  
Deuterium Oxide  
700 MHz

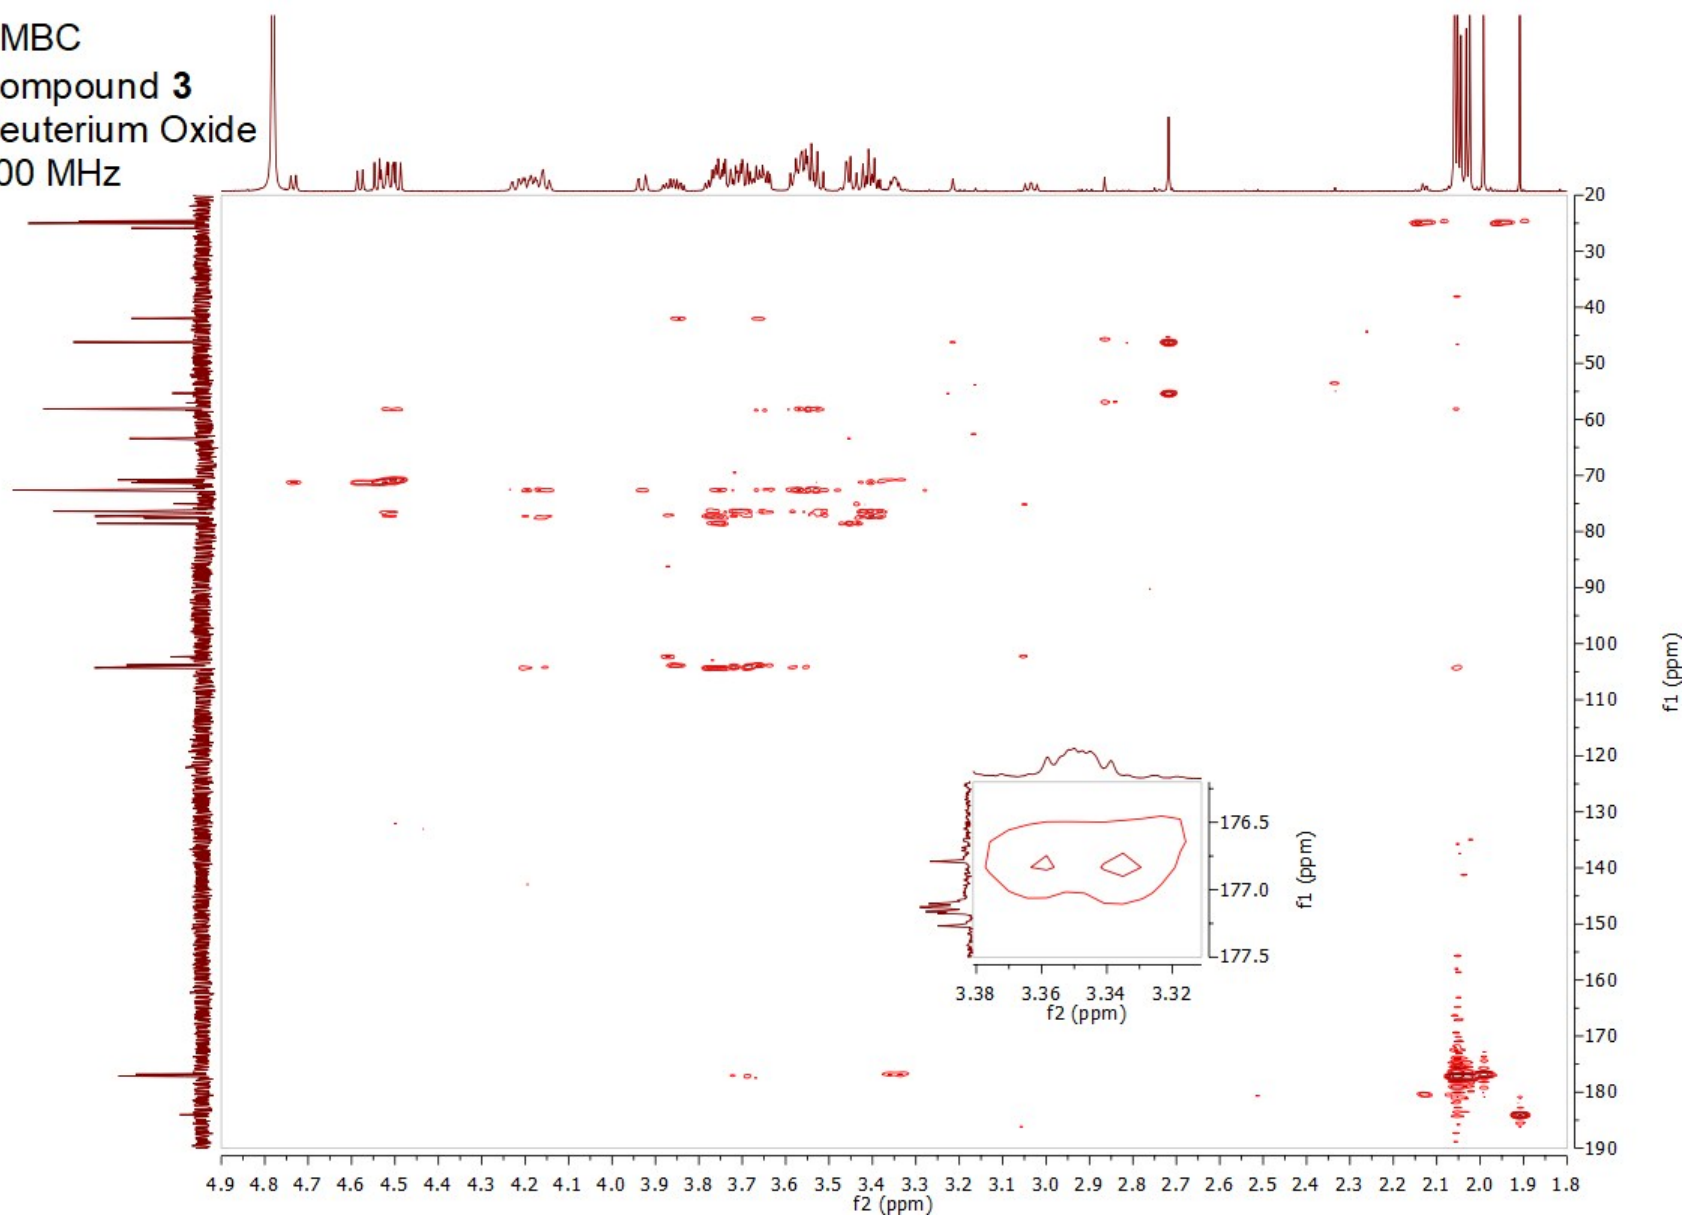

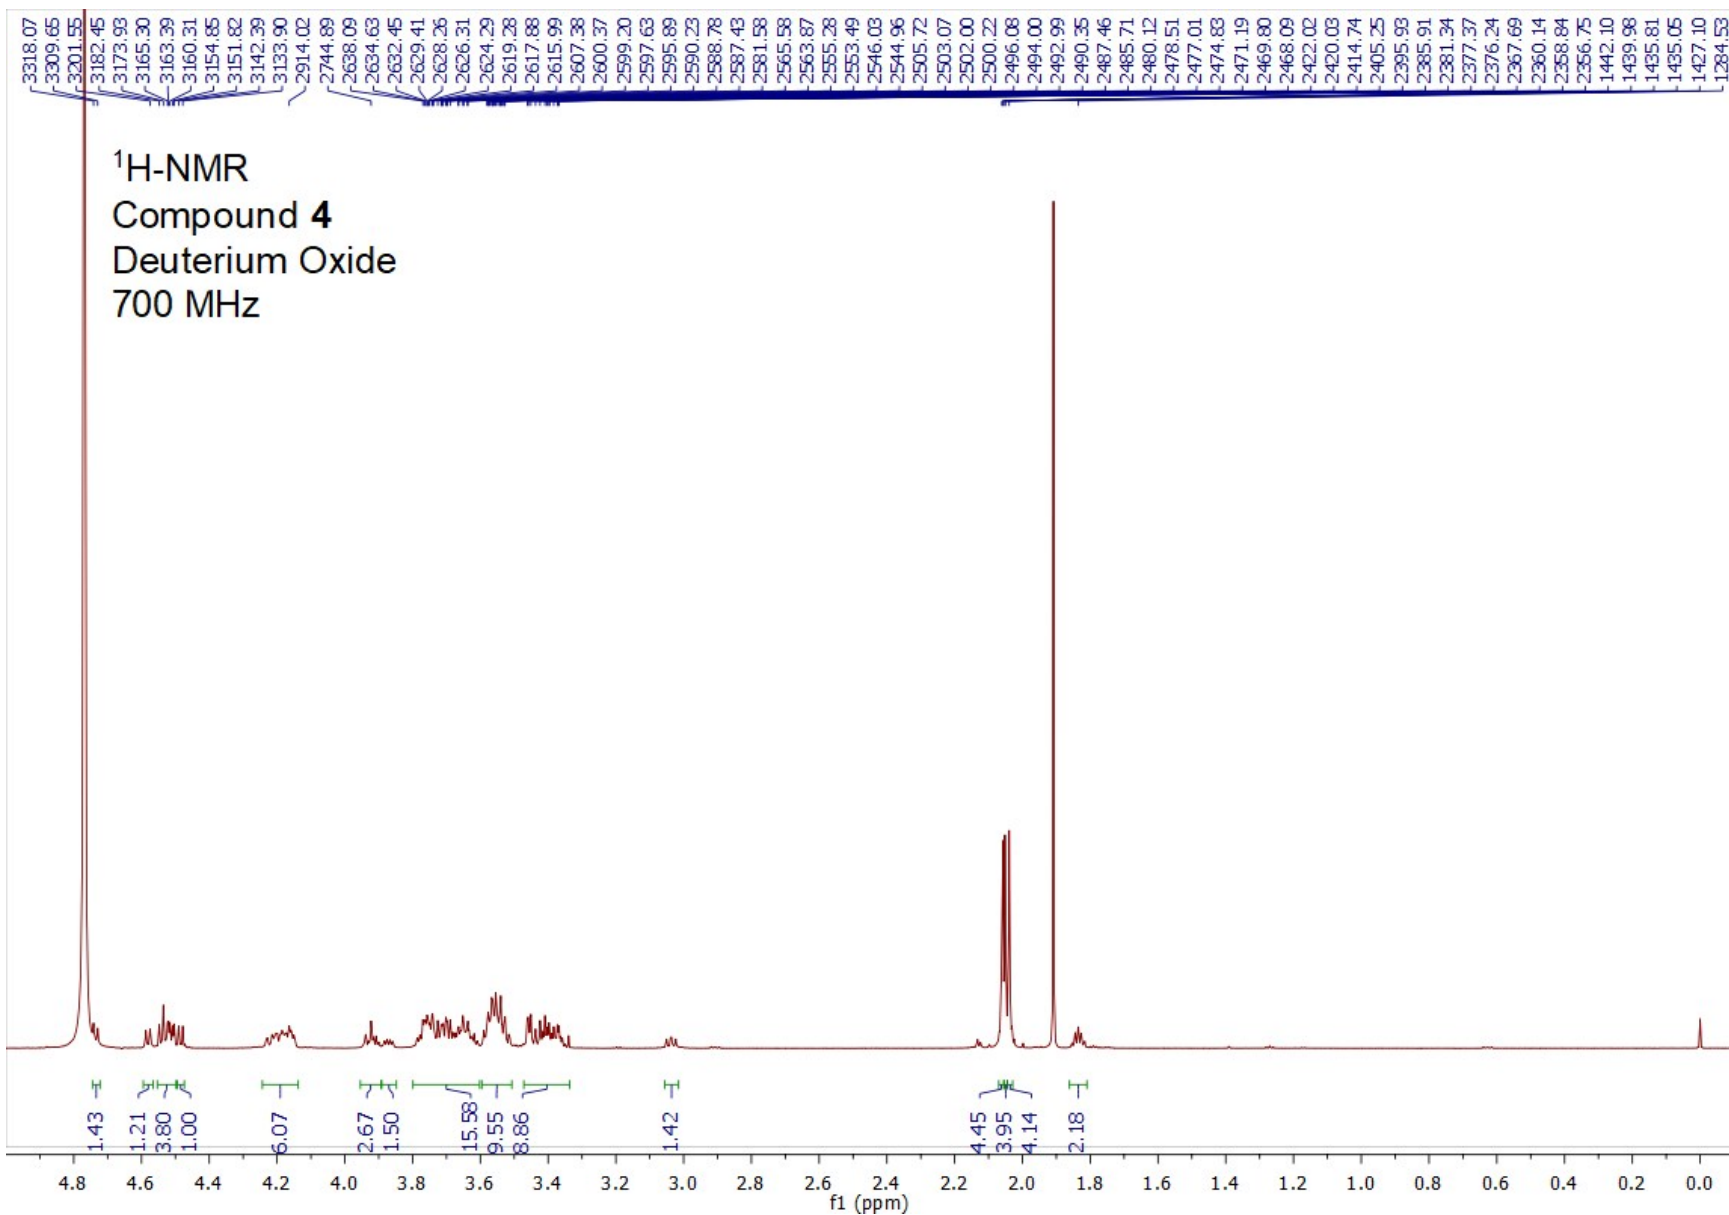

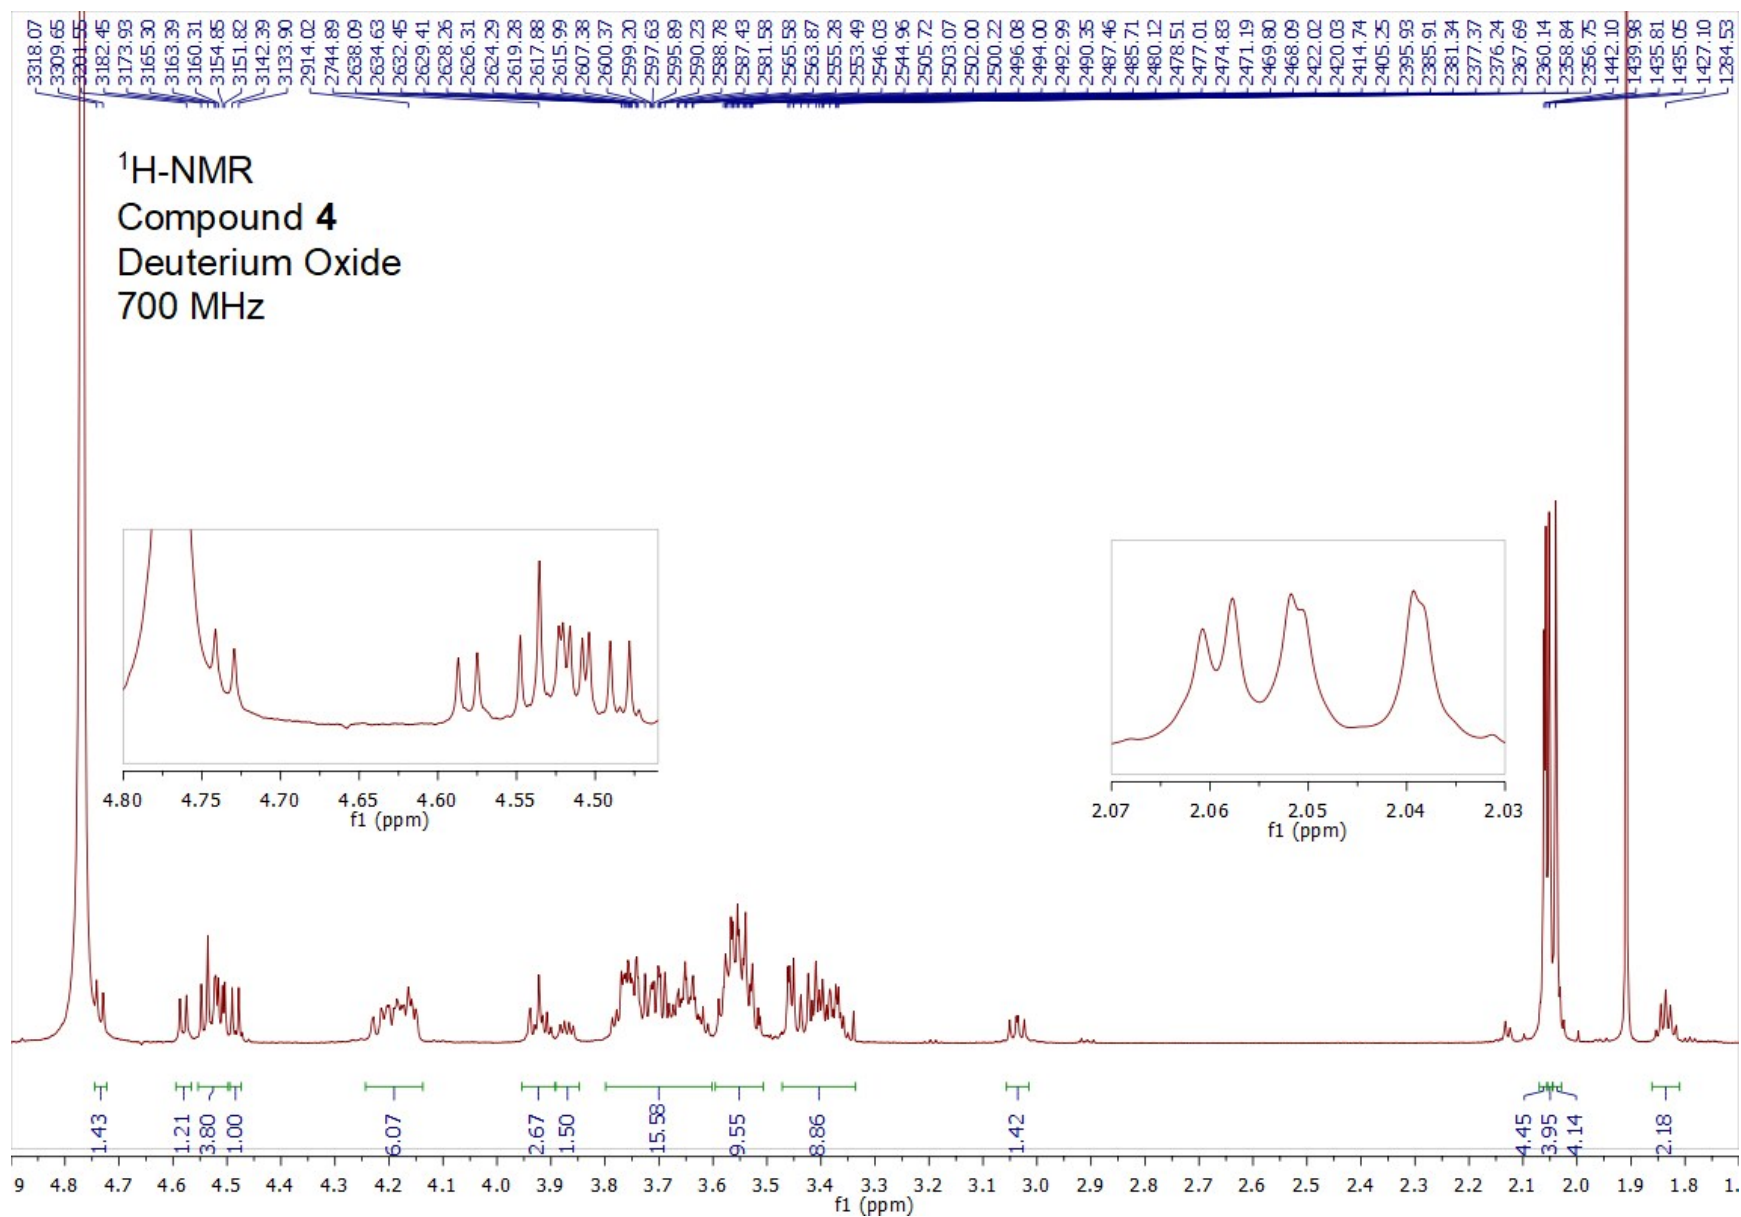

COSY  
Compound 4  
Deuterium Oxide  
700 MHz

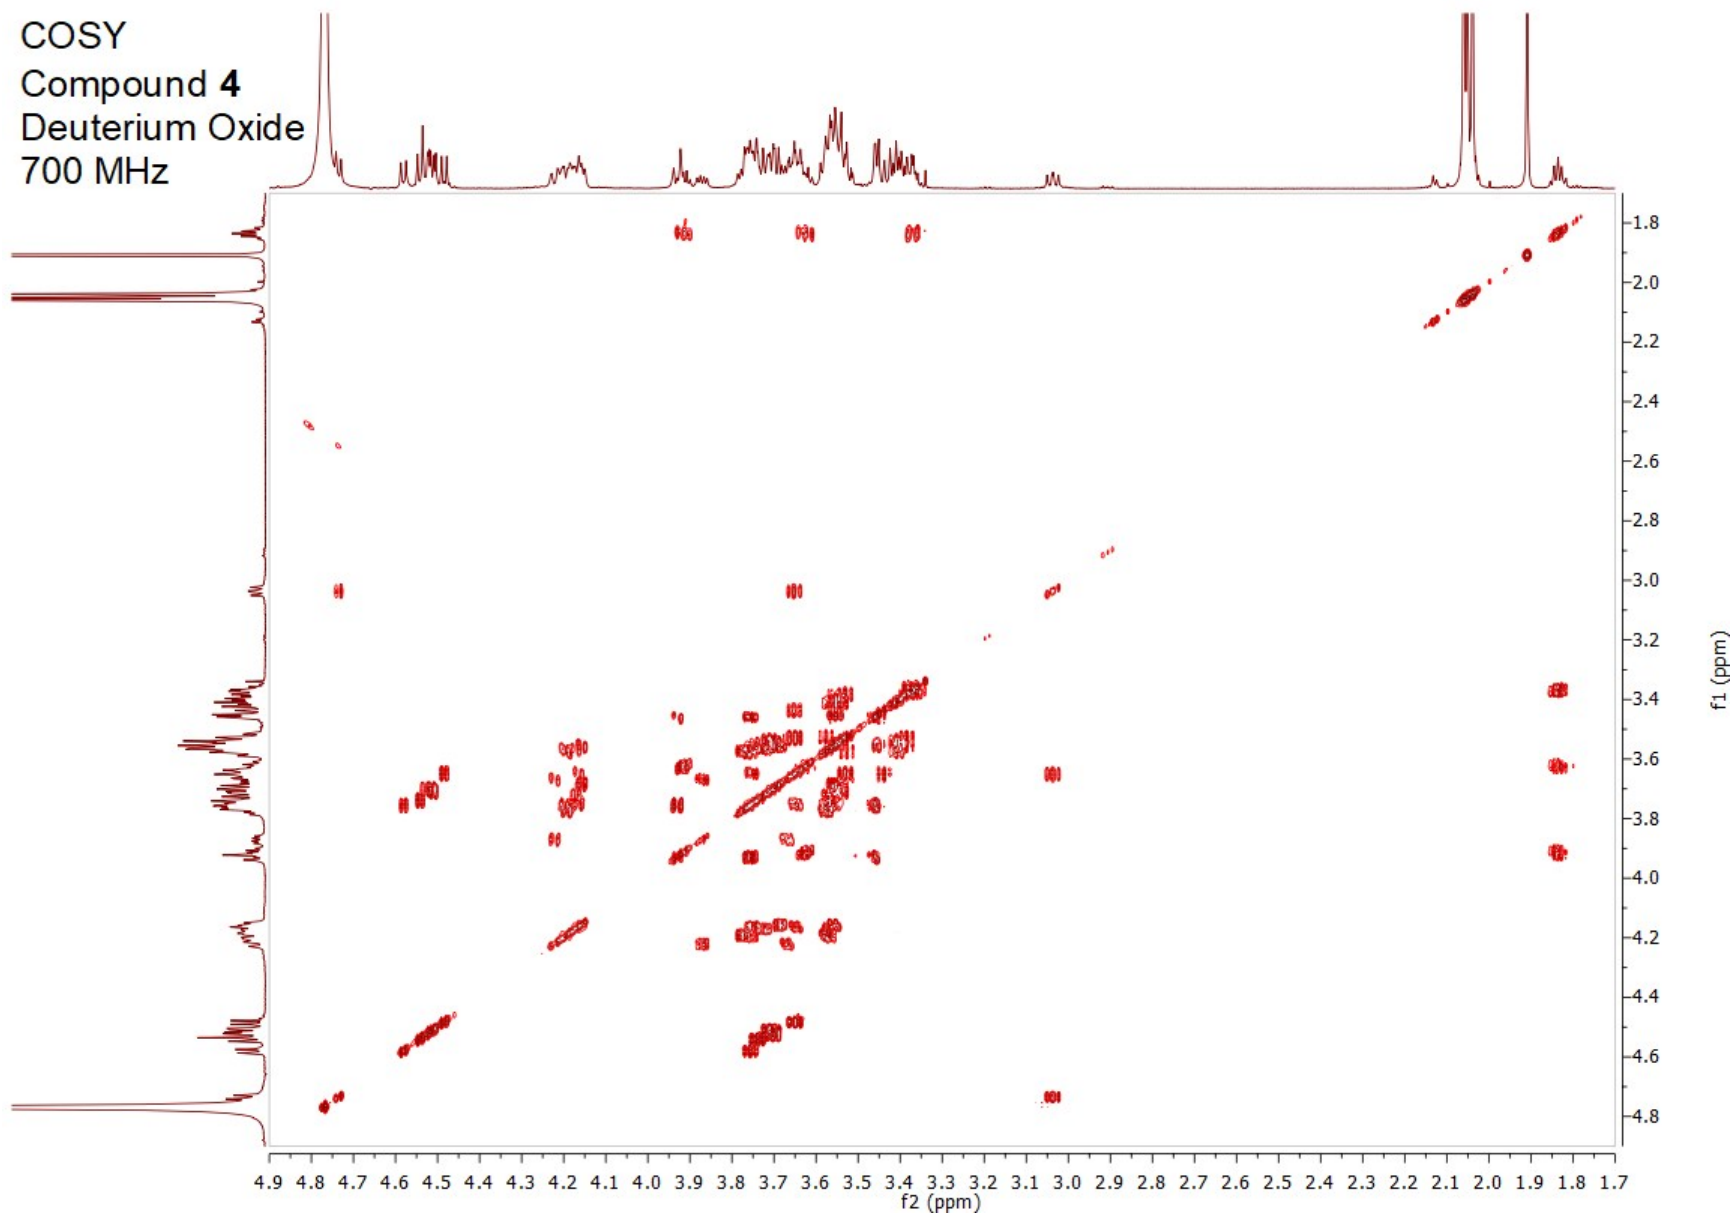



TOCSY  
Compound 4  
Deuterium Oxide  
700 MHz

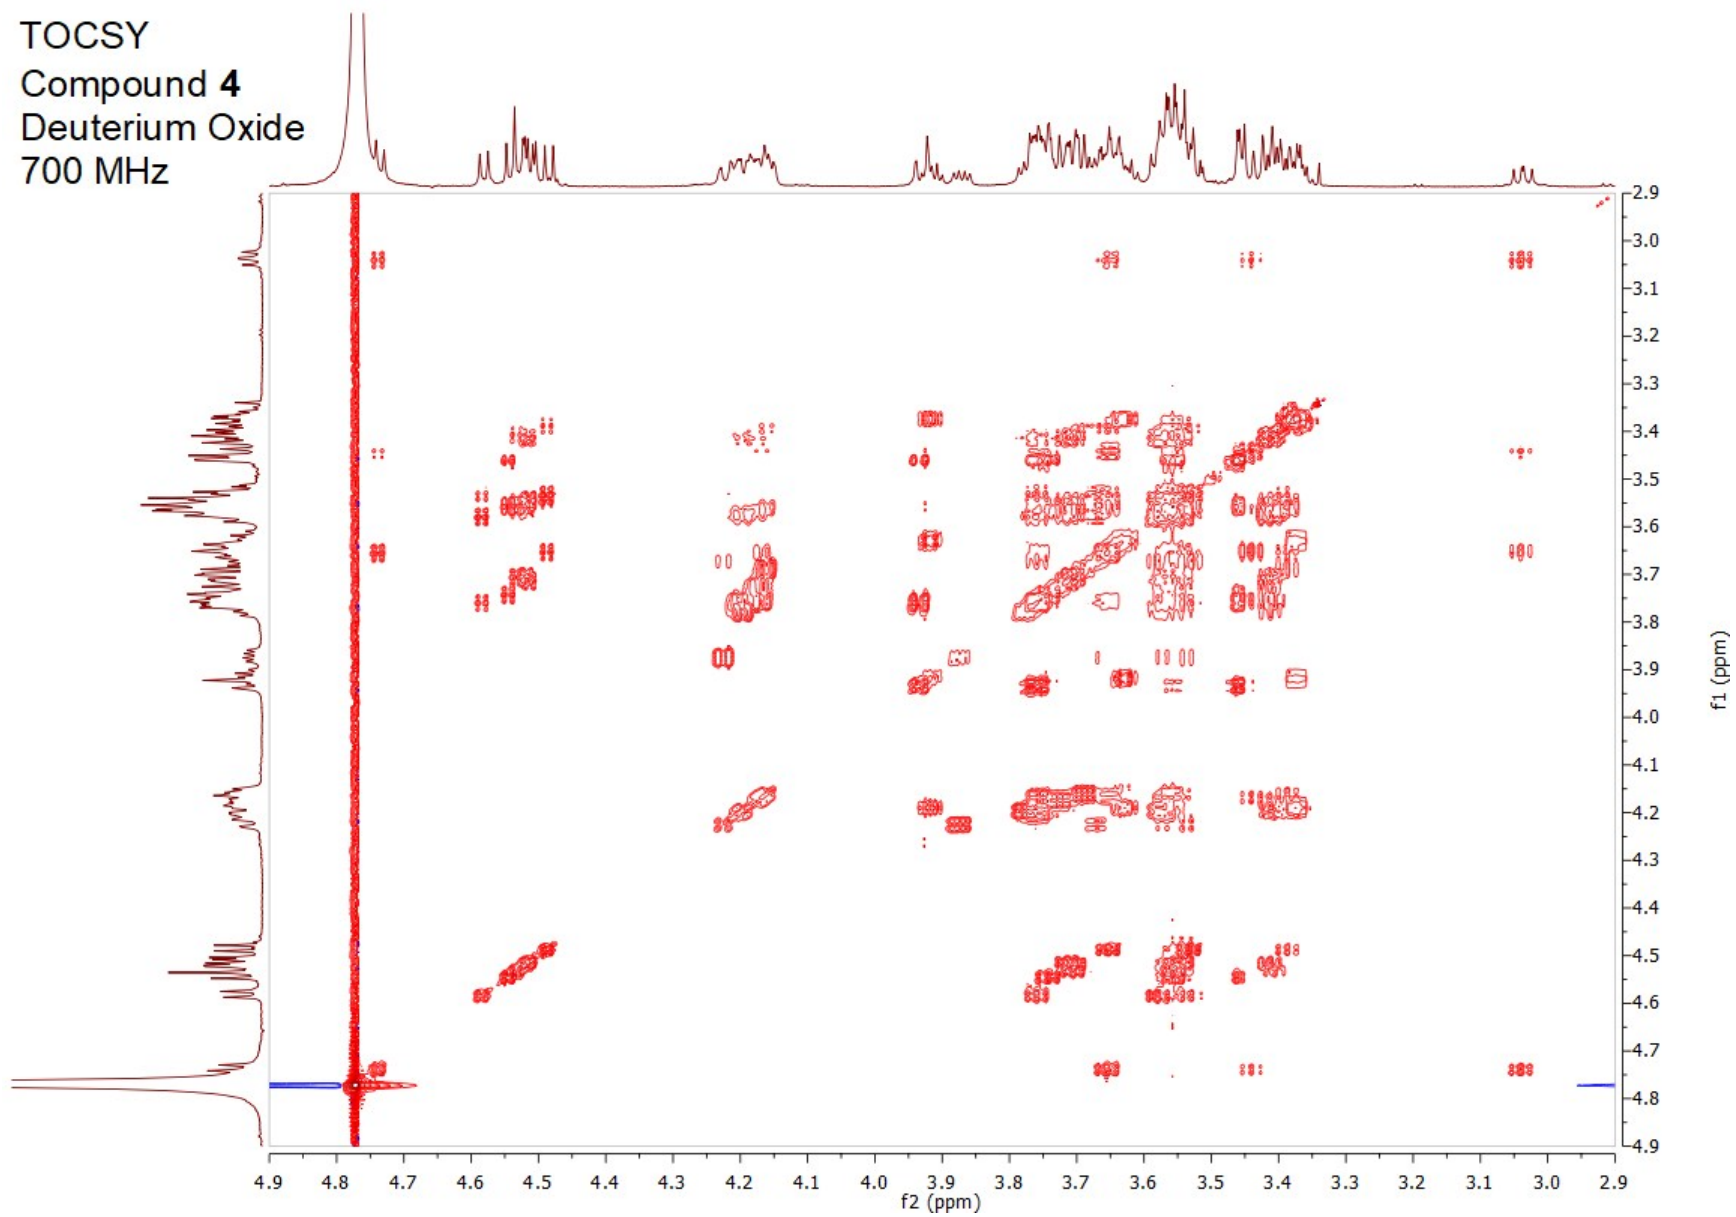



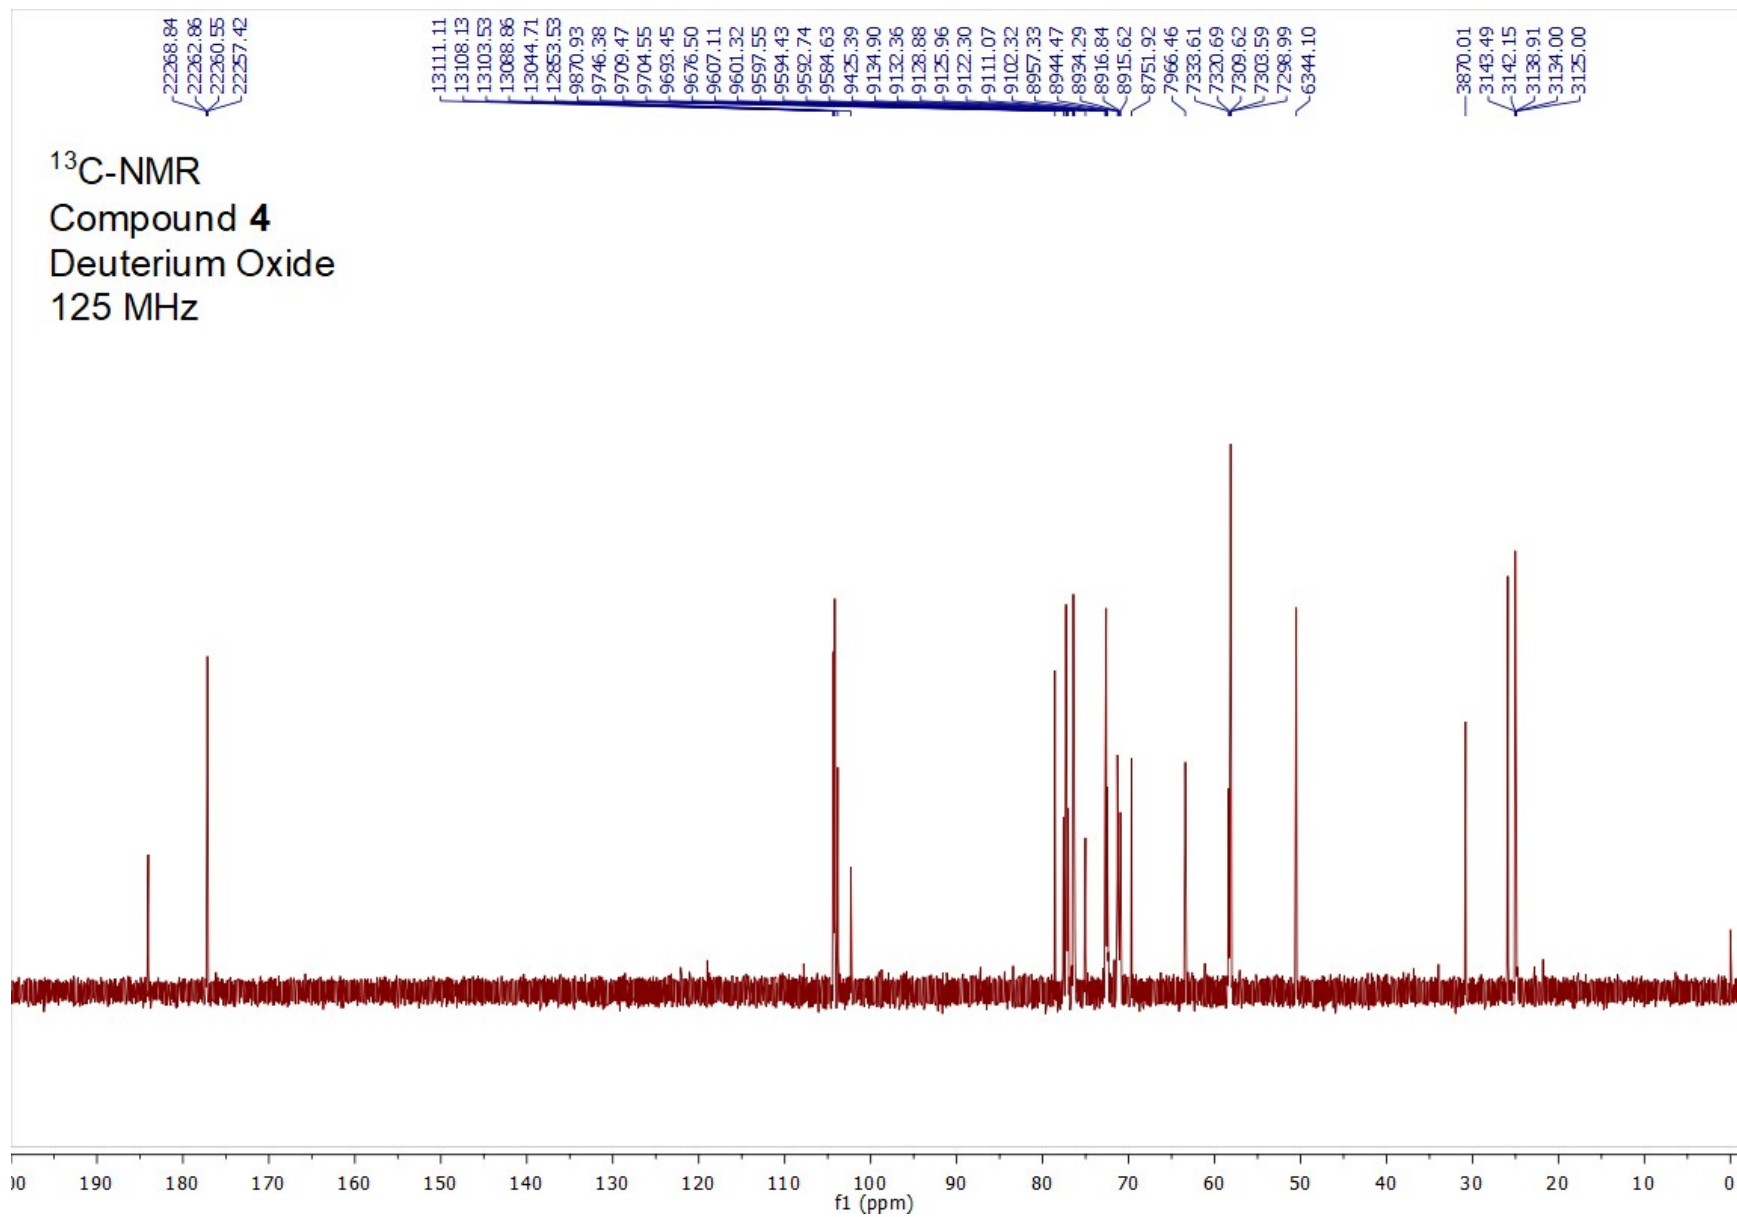

HSQC  
Compound 4  
Deuterium Oxide  
700 MHz

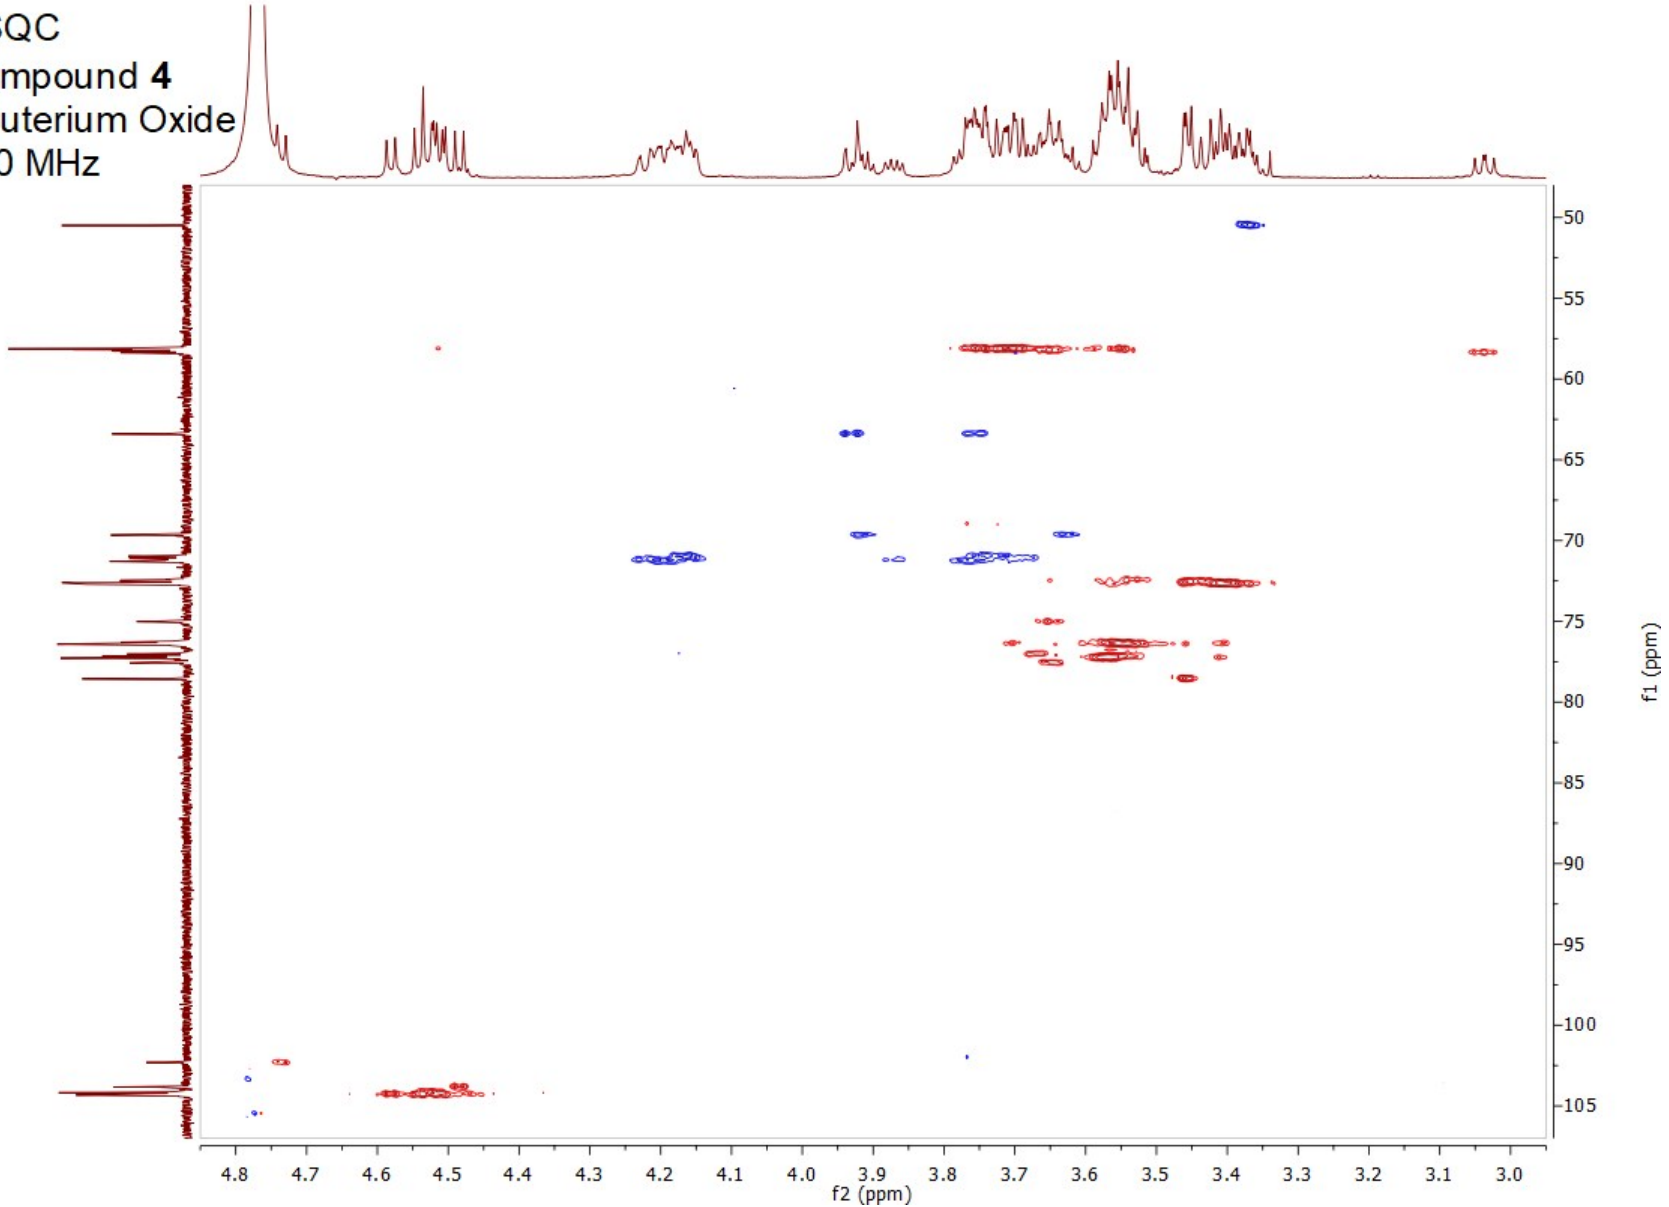

<sup>1</sup>H-NMR  
Compound **6**  
Chloroform-*d*  
400 MHz

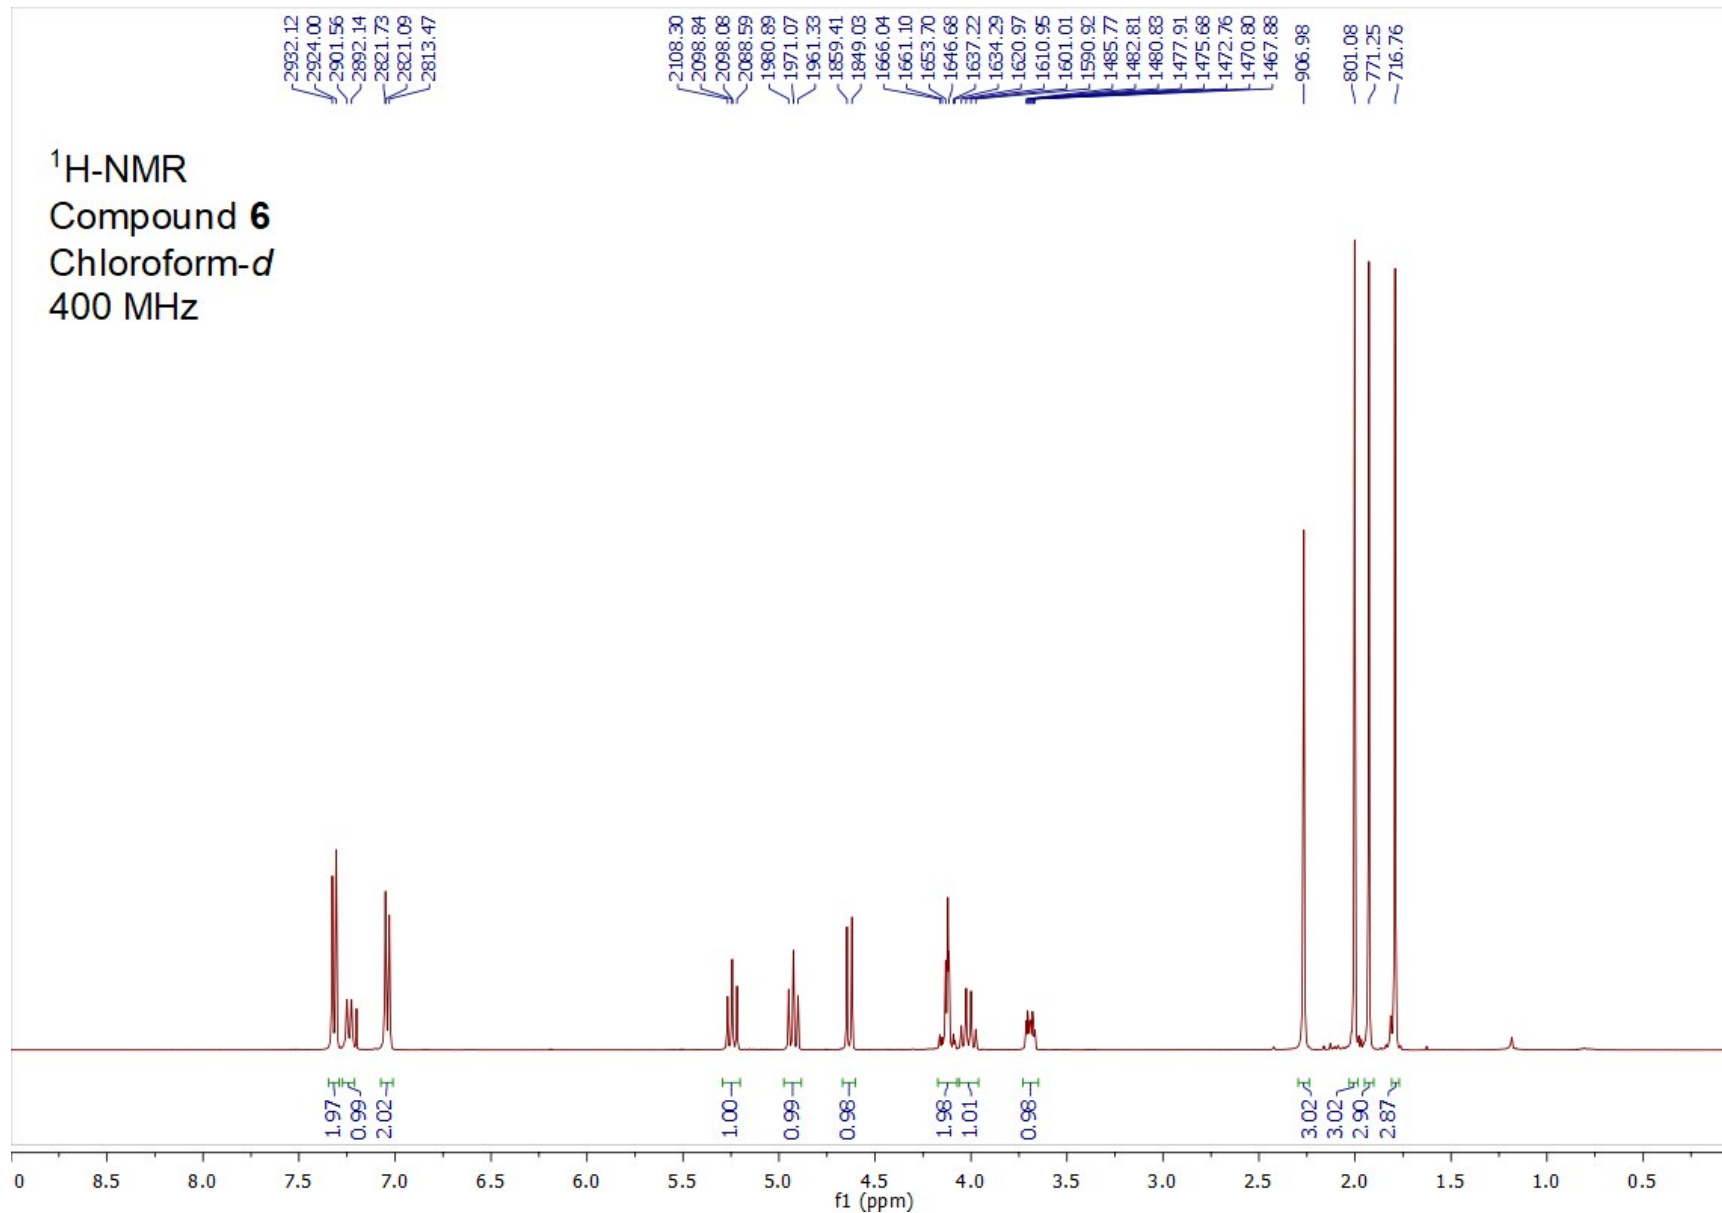

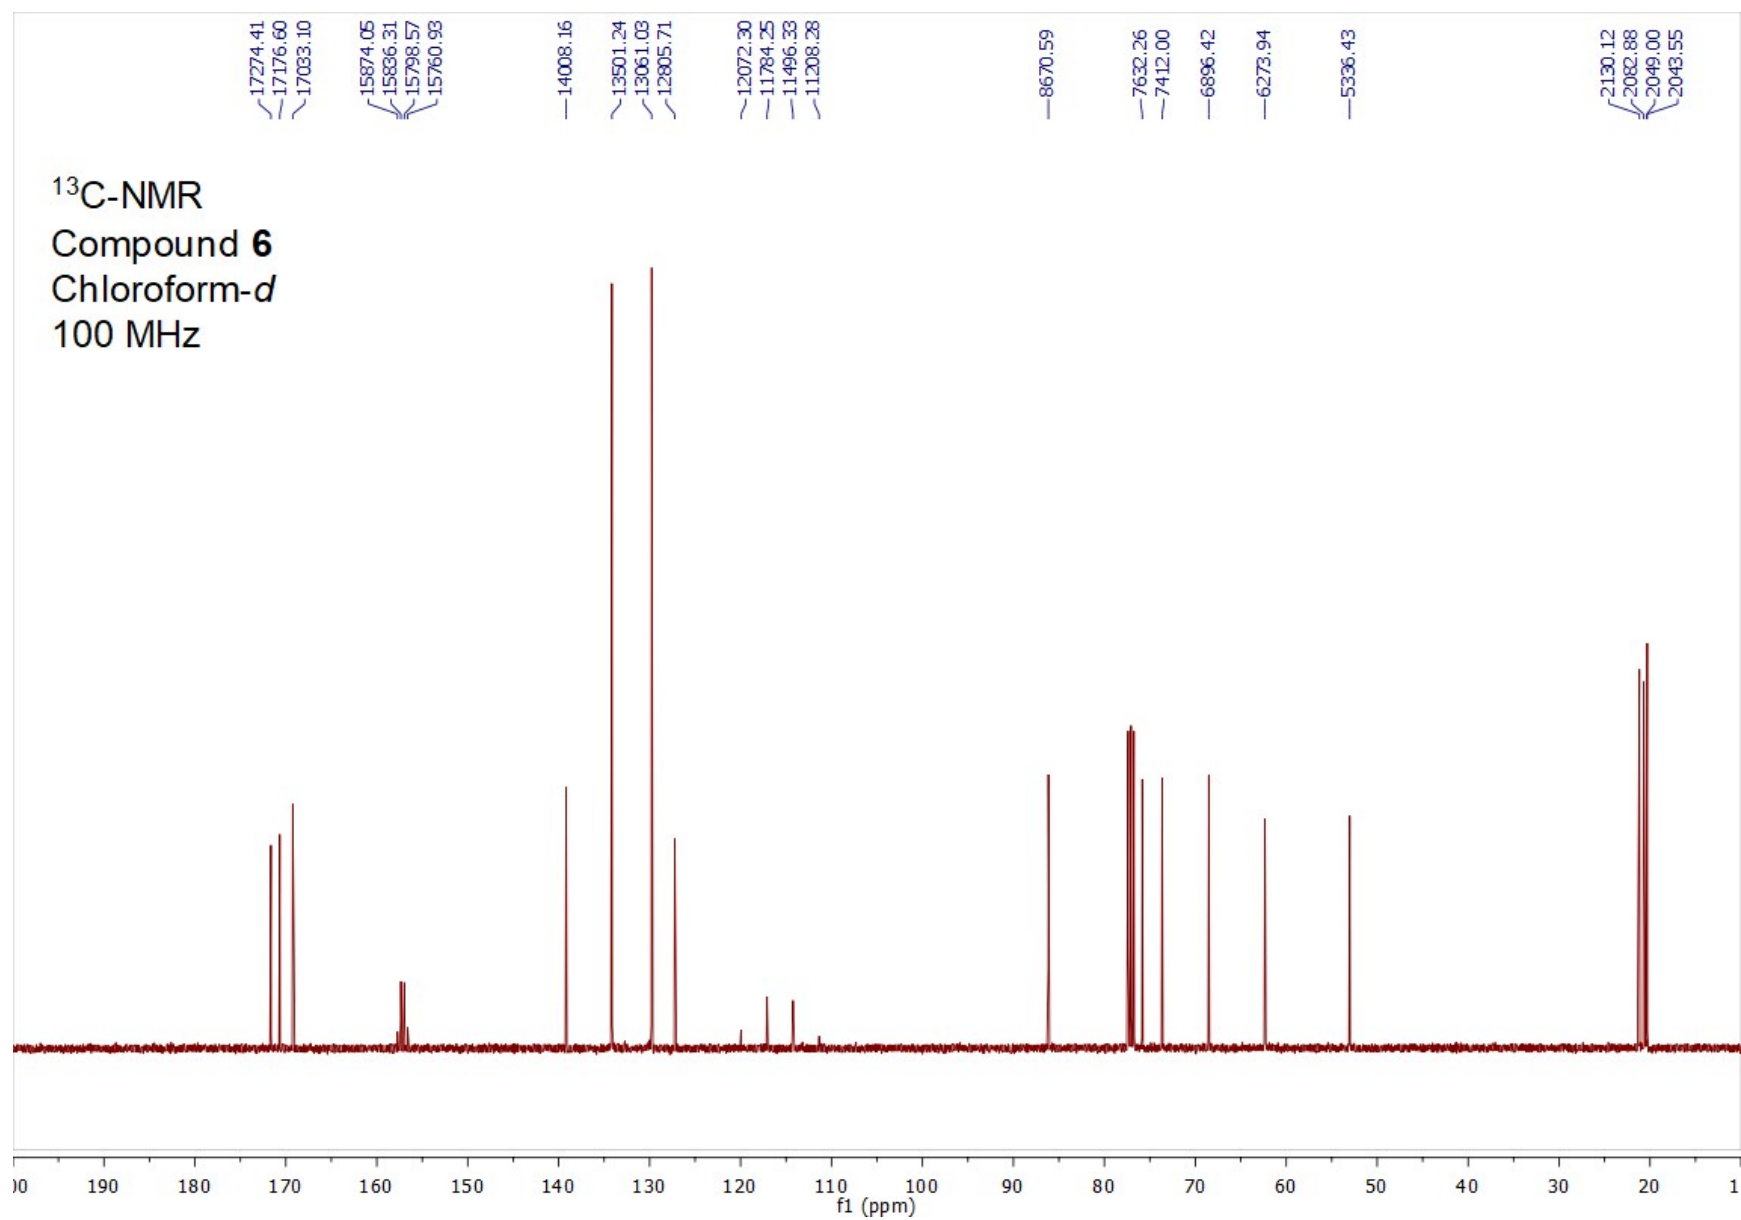

<sup>1</sup>H-NMR  
Compound **7**  
Methanol-*d*<sub>4</sub>  
400 MHz

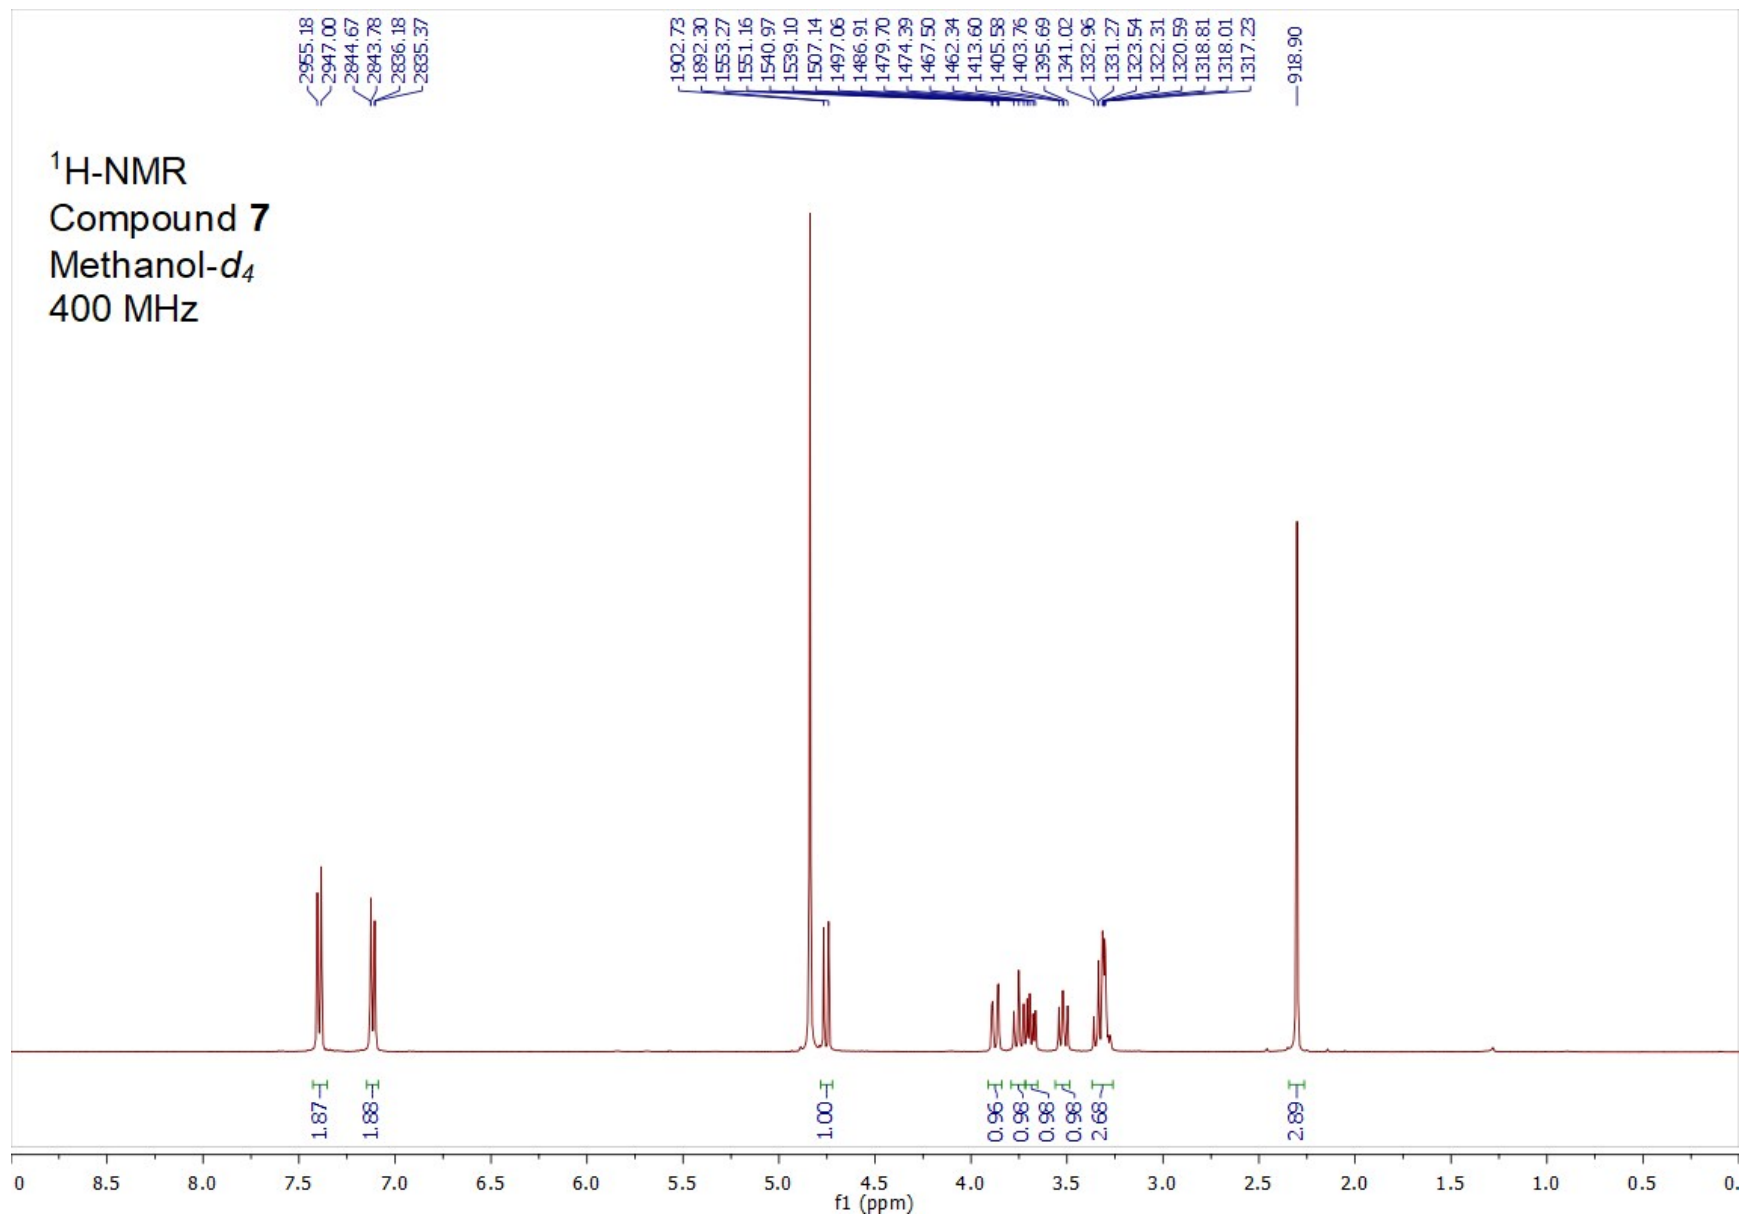

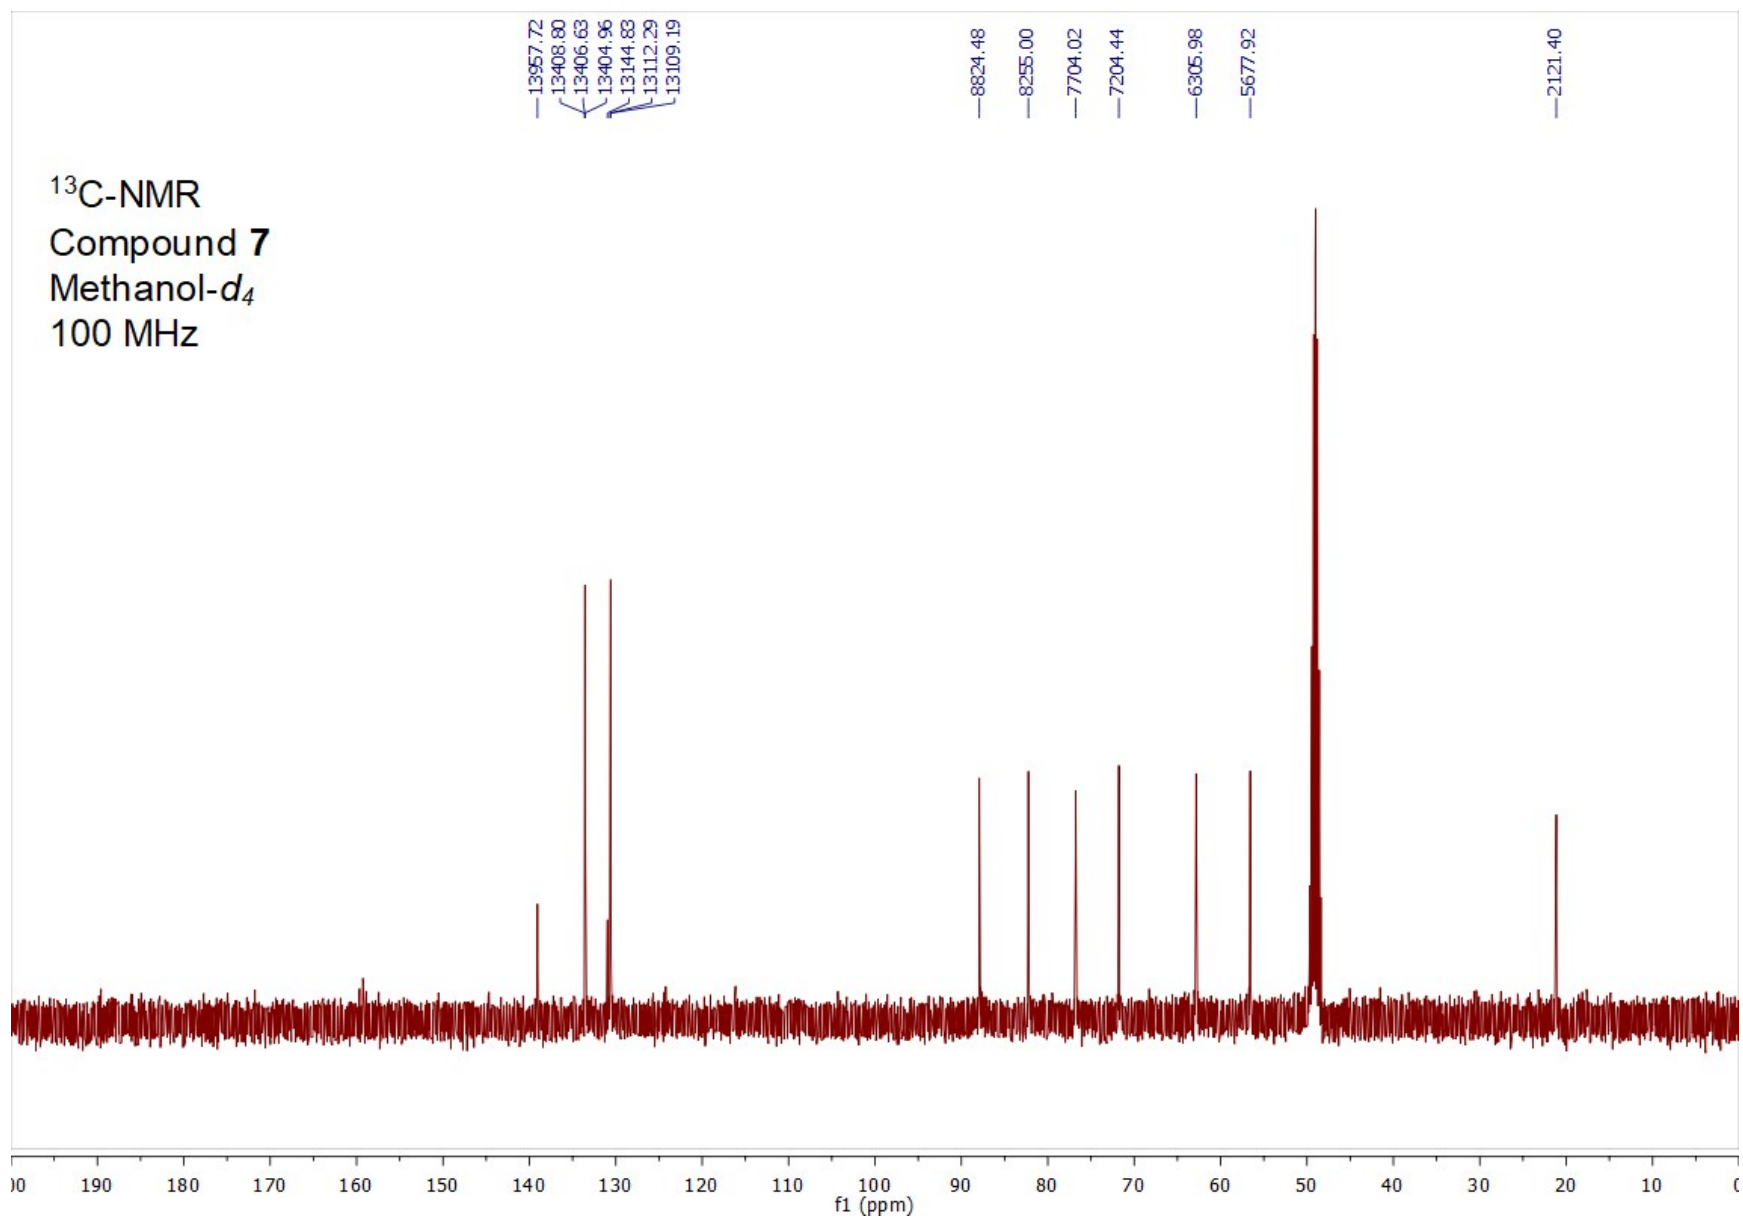

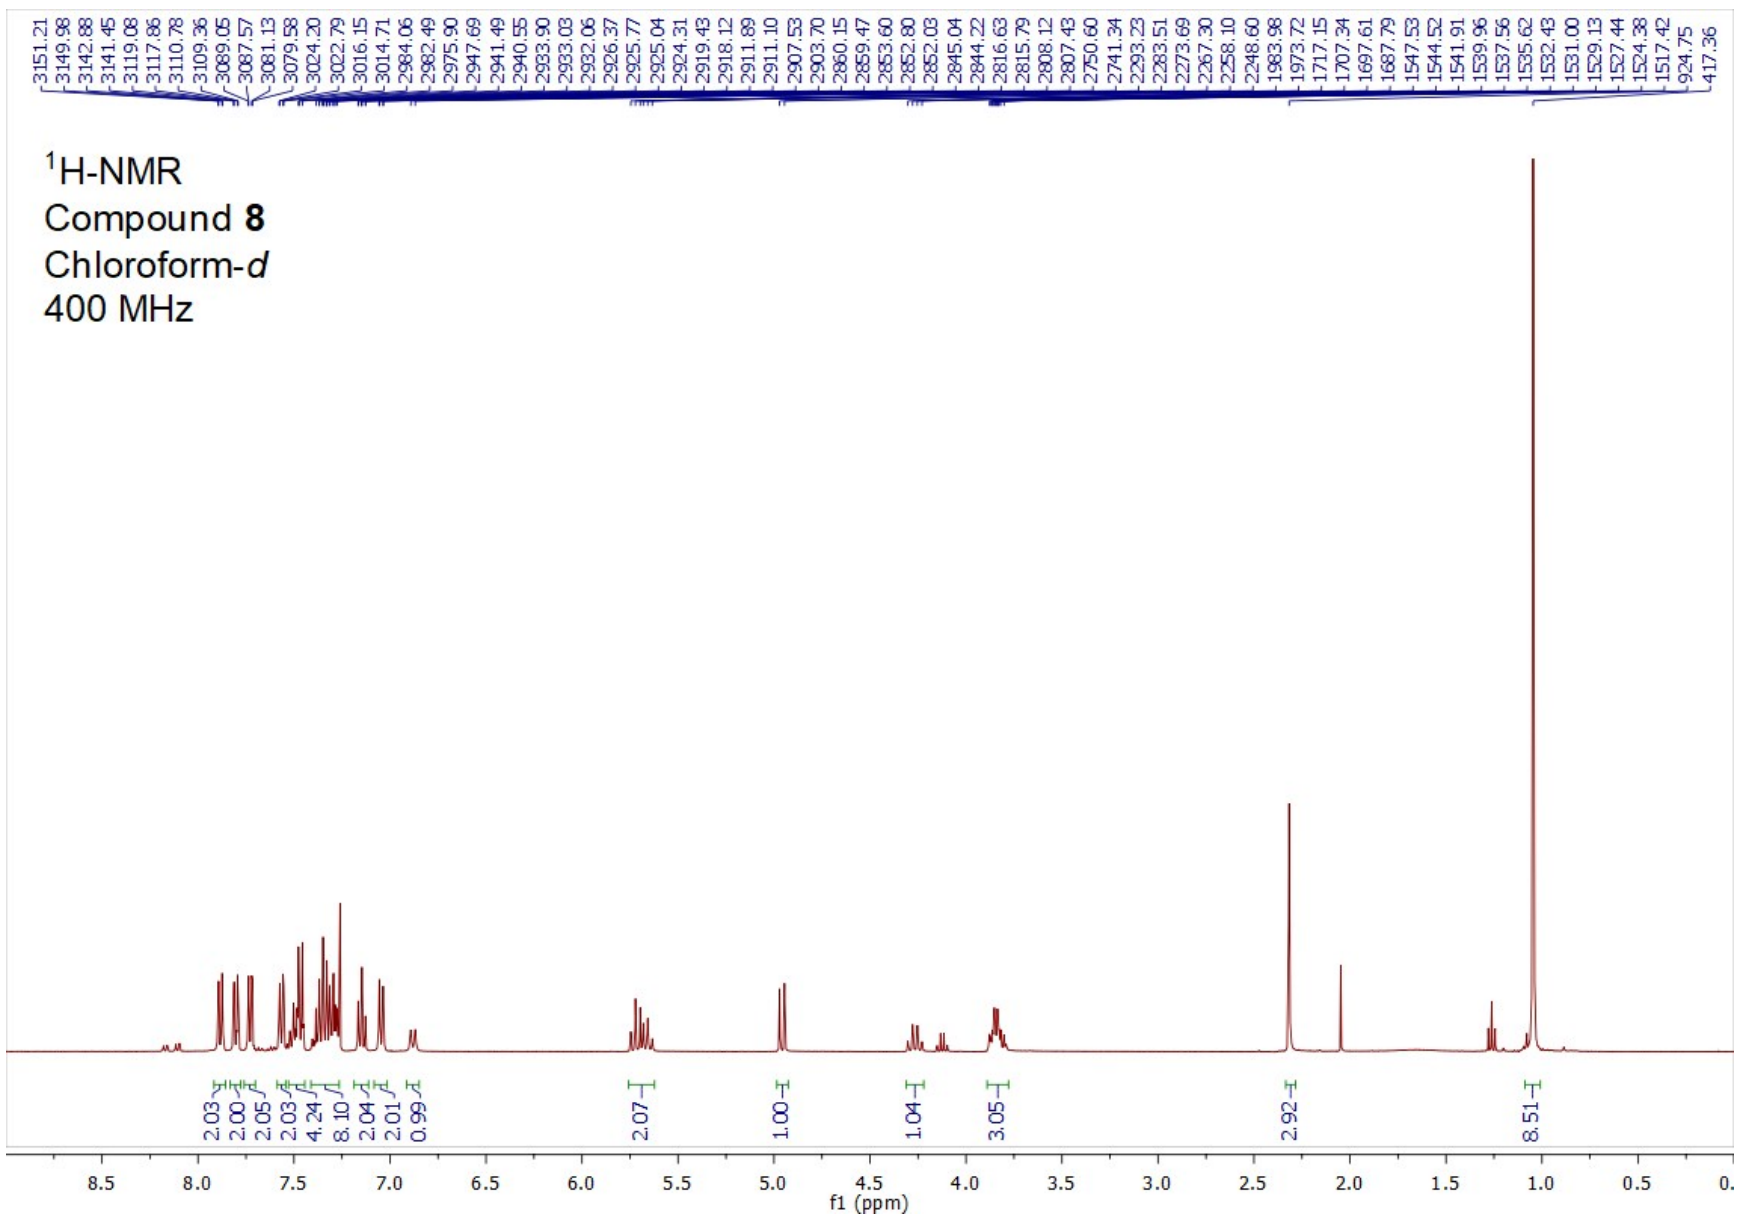

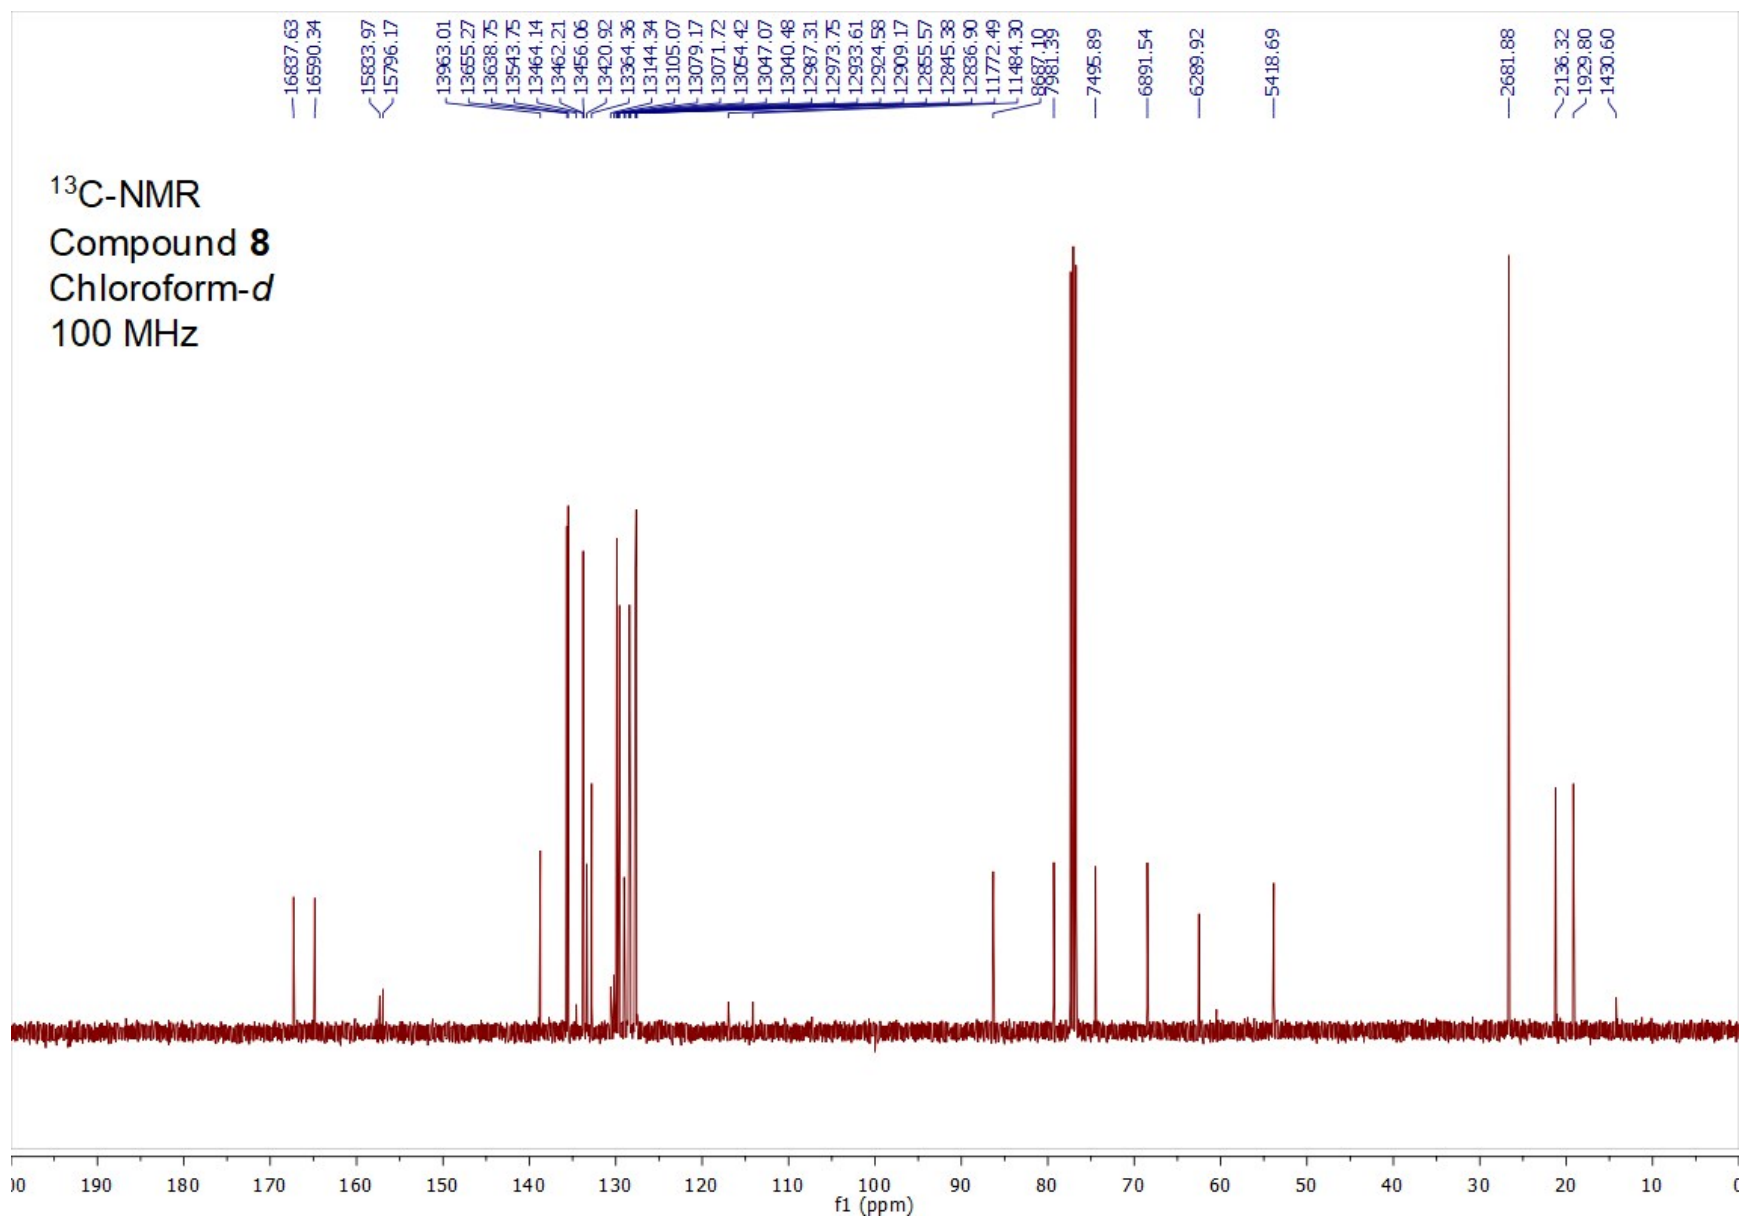



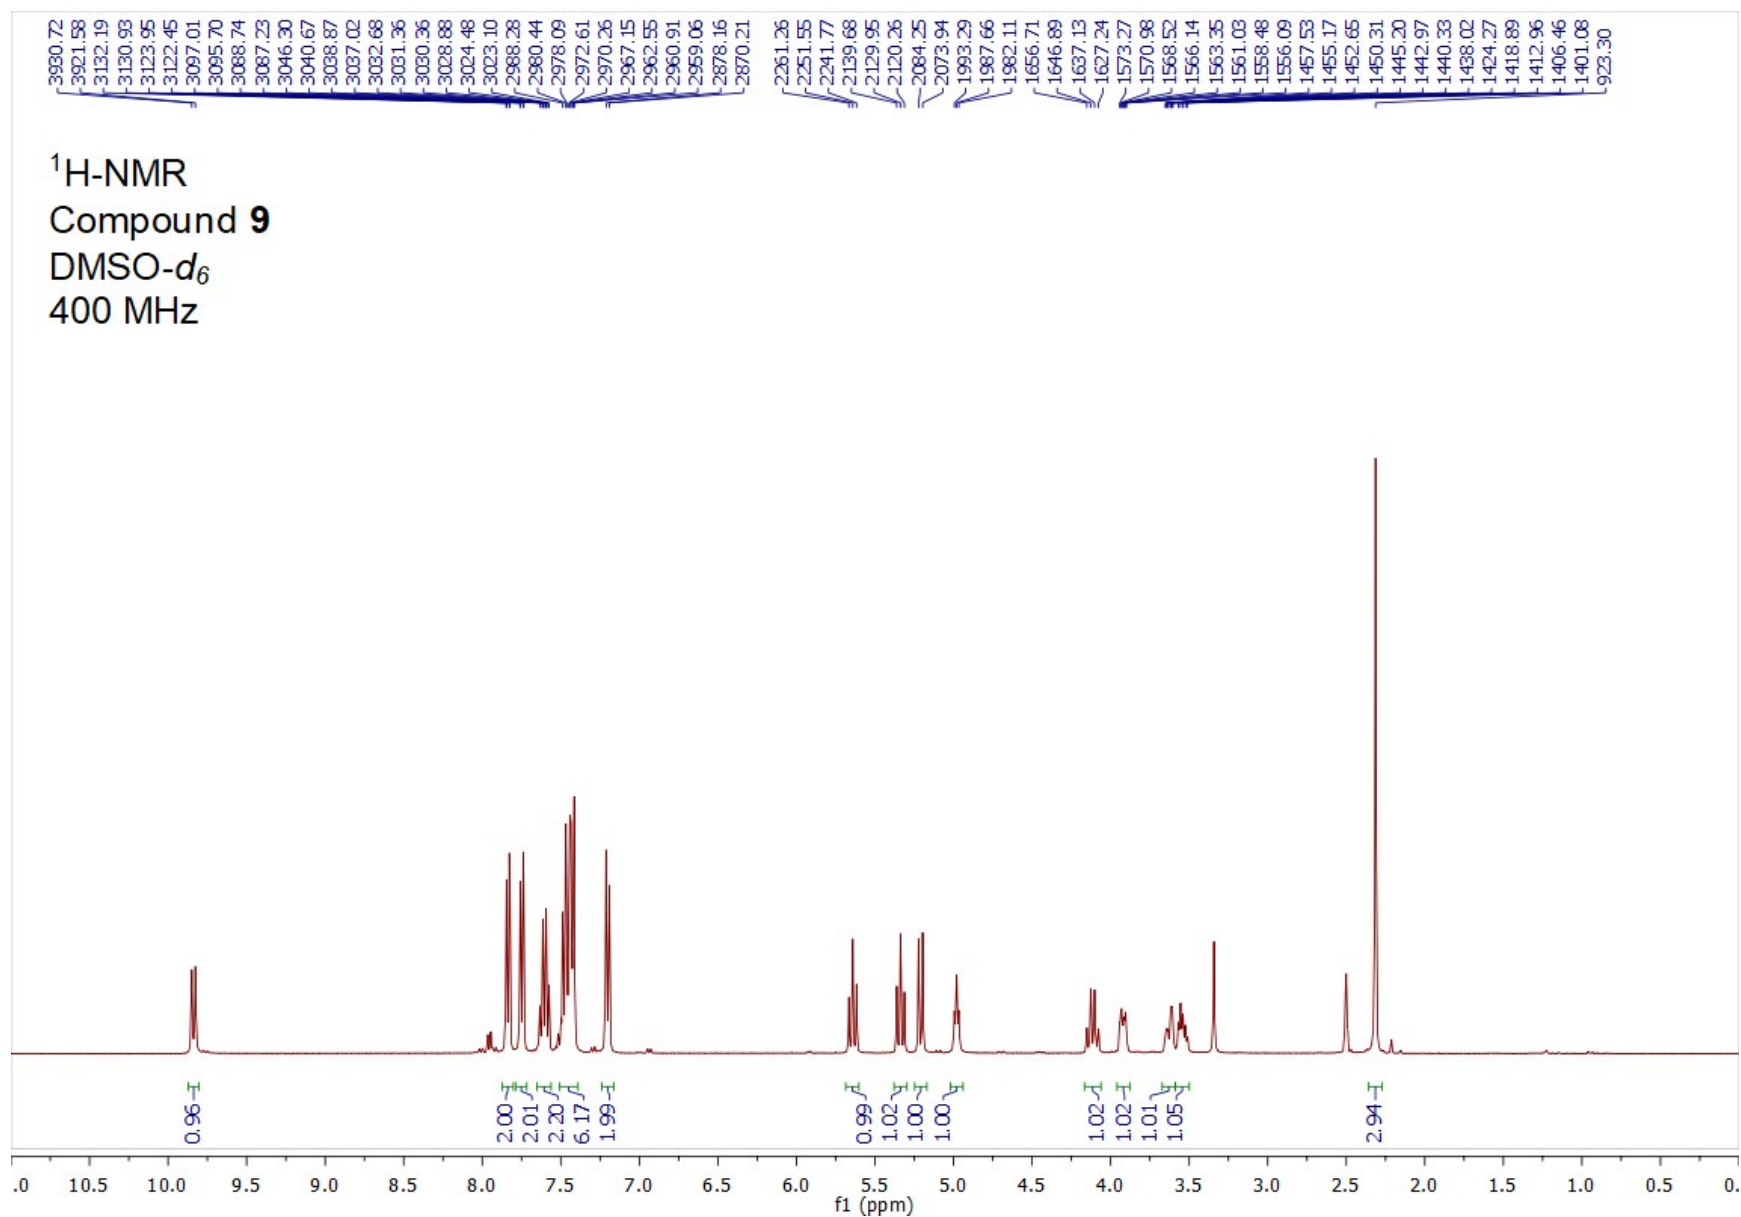

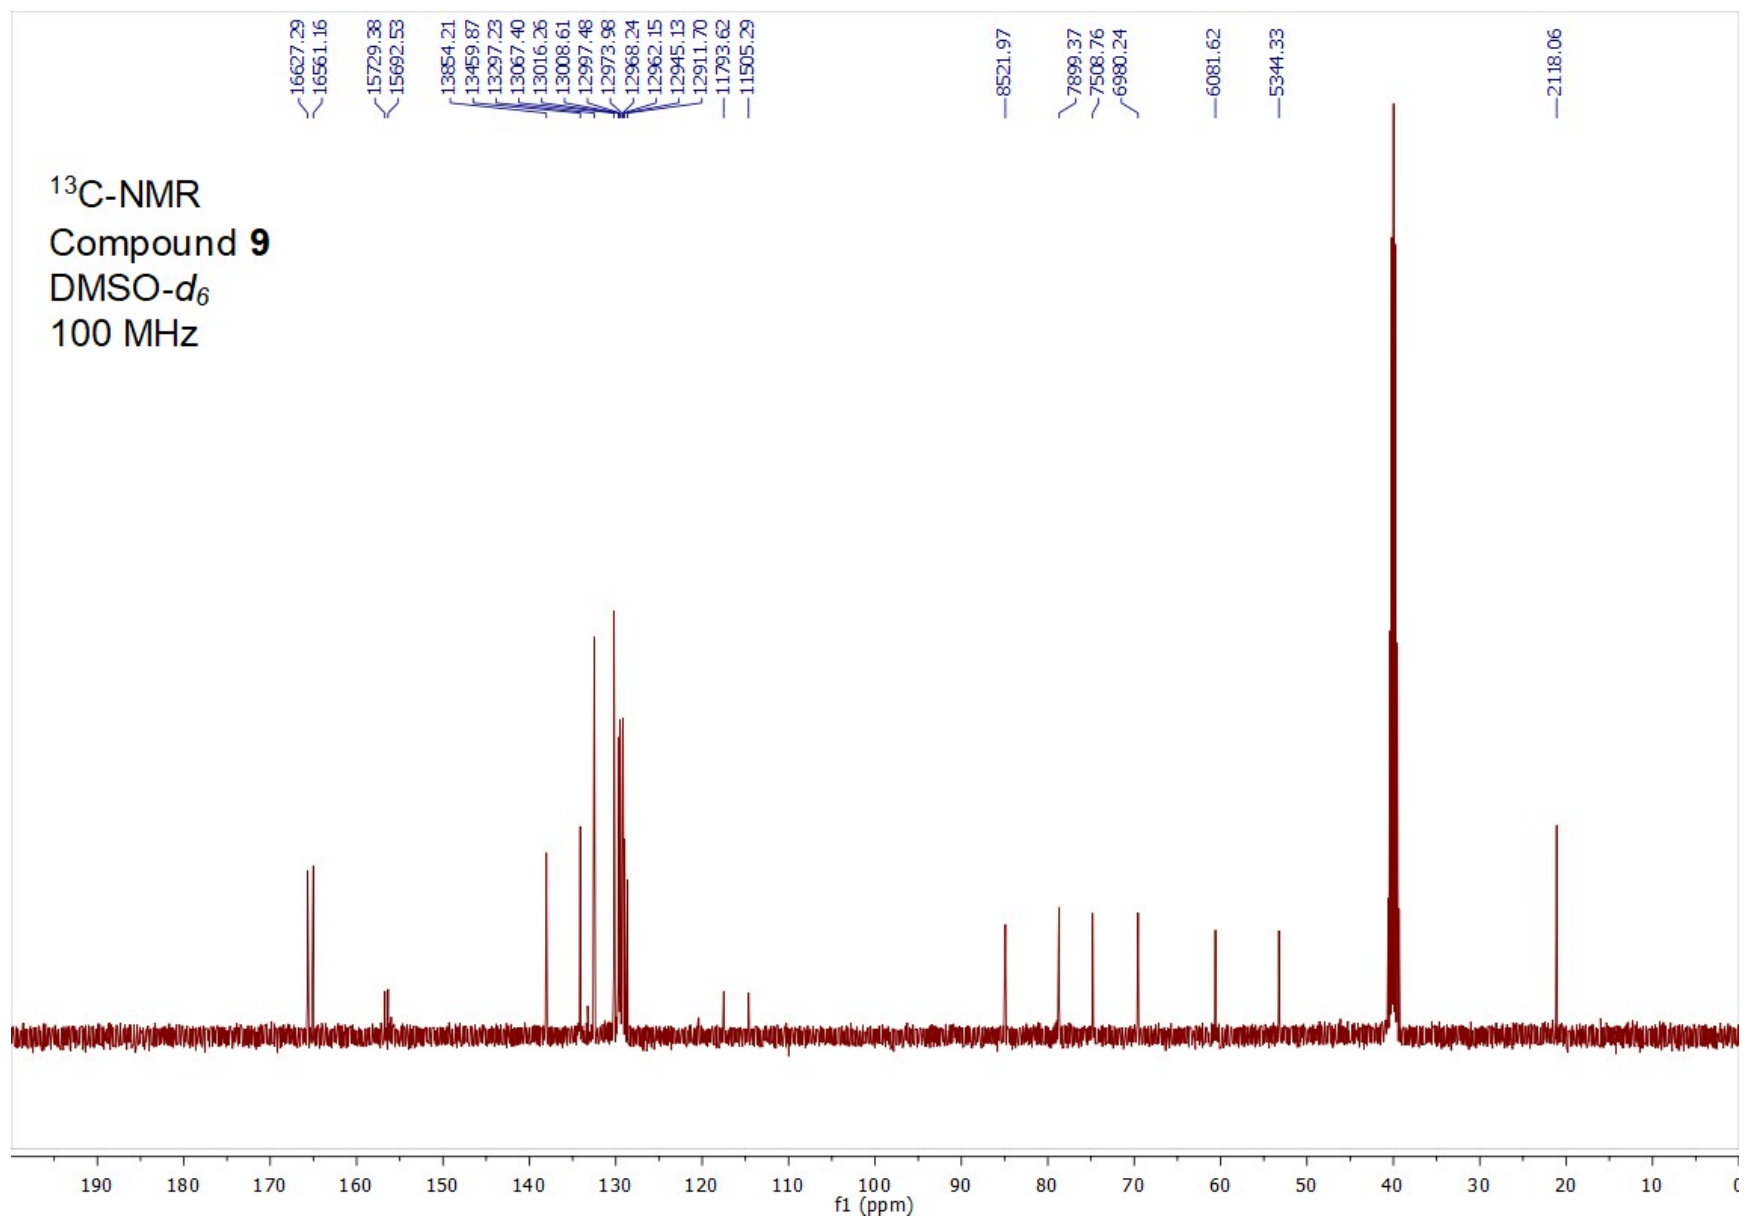

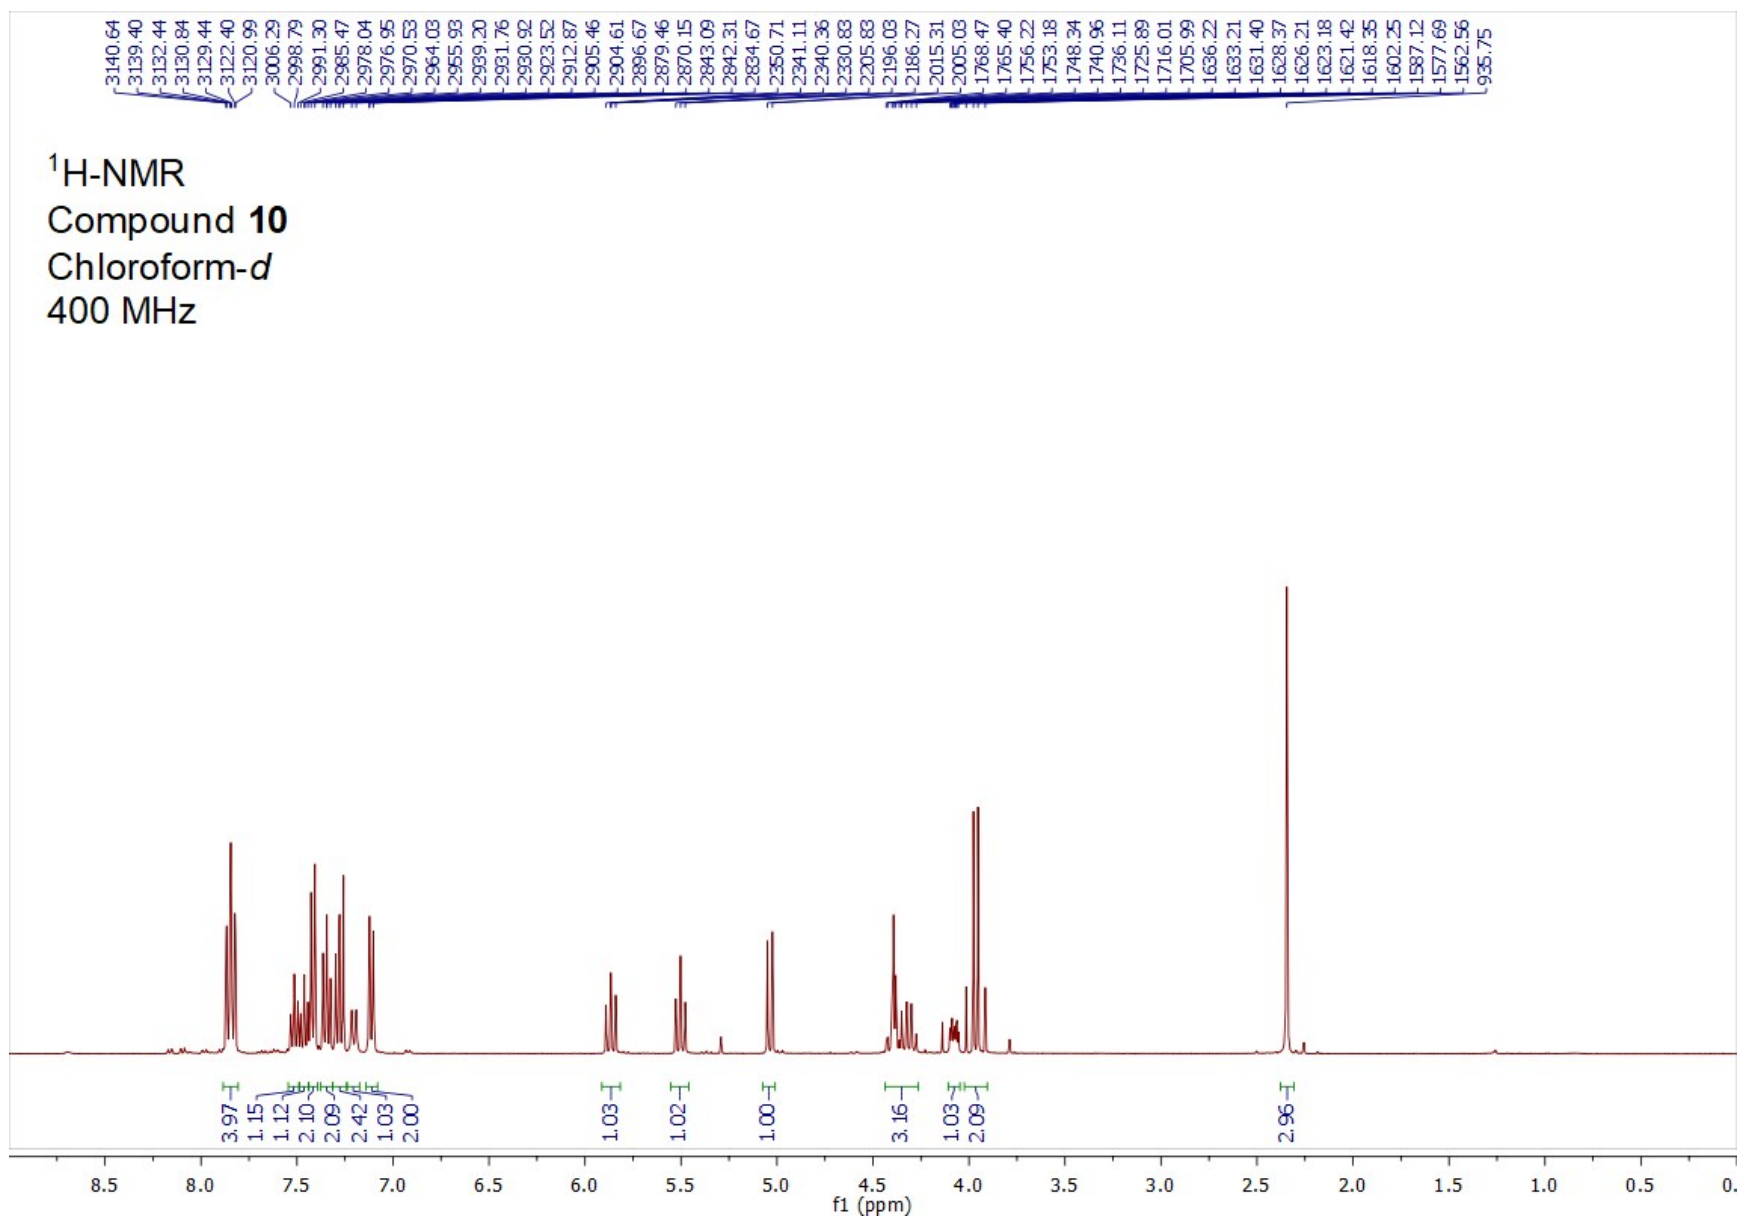

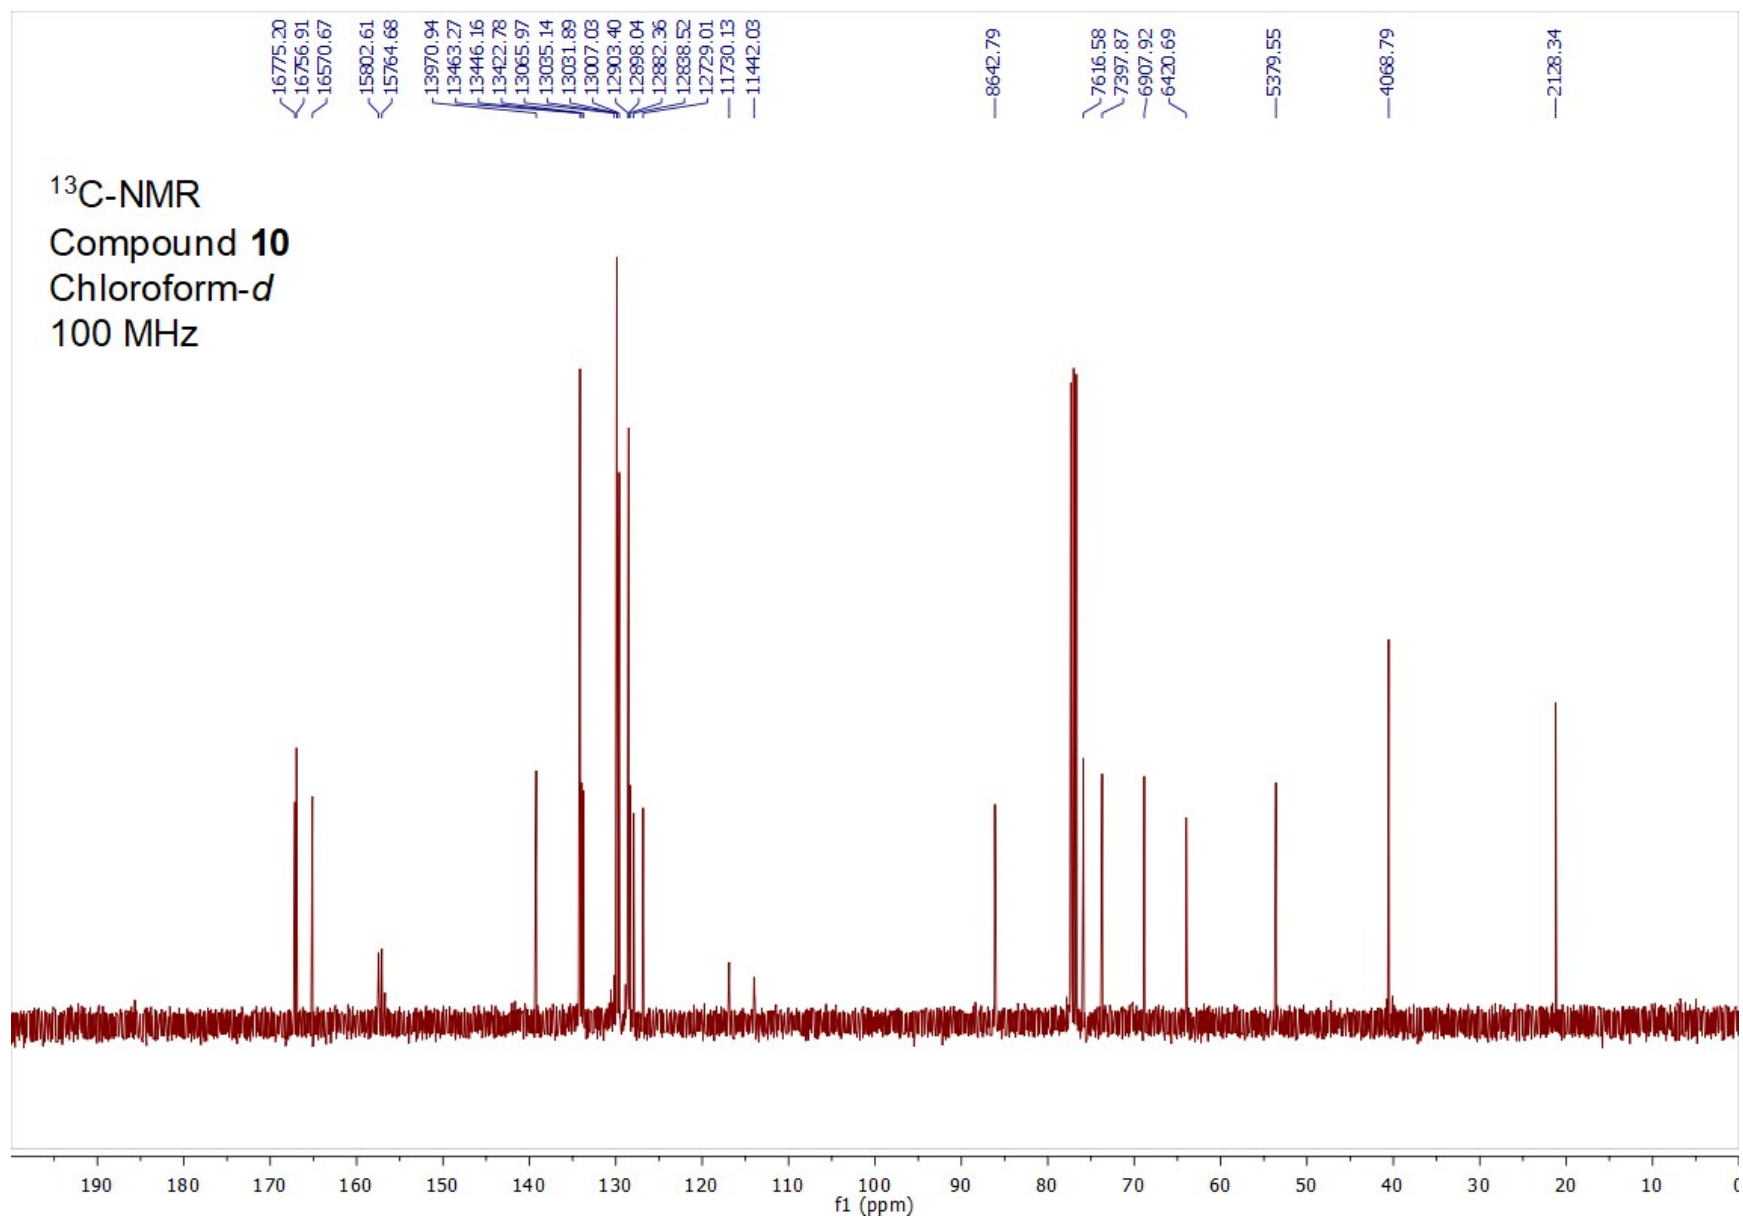

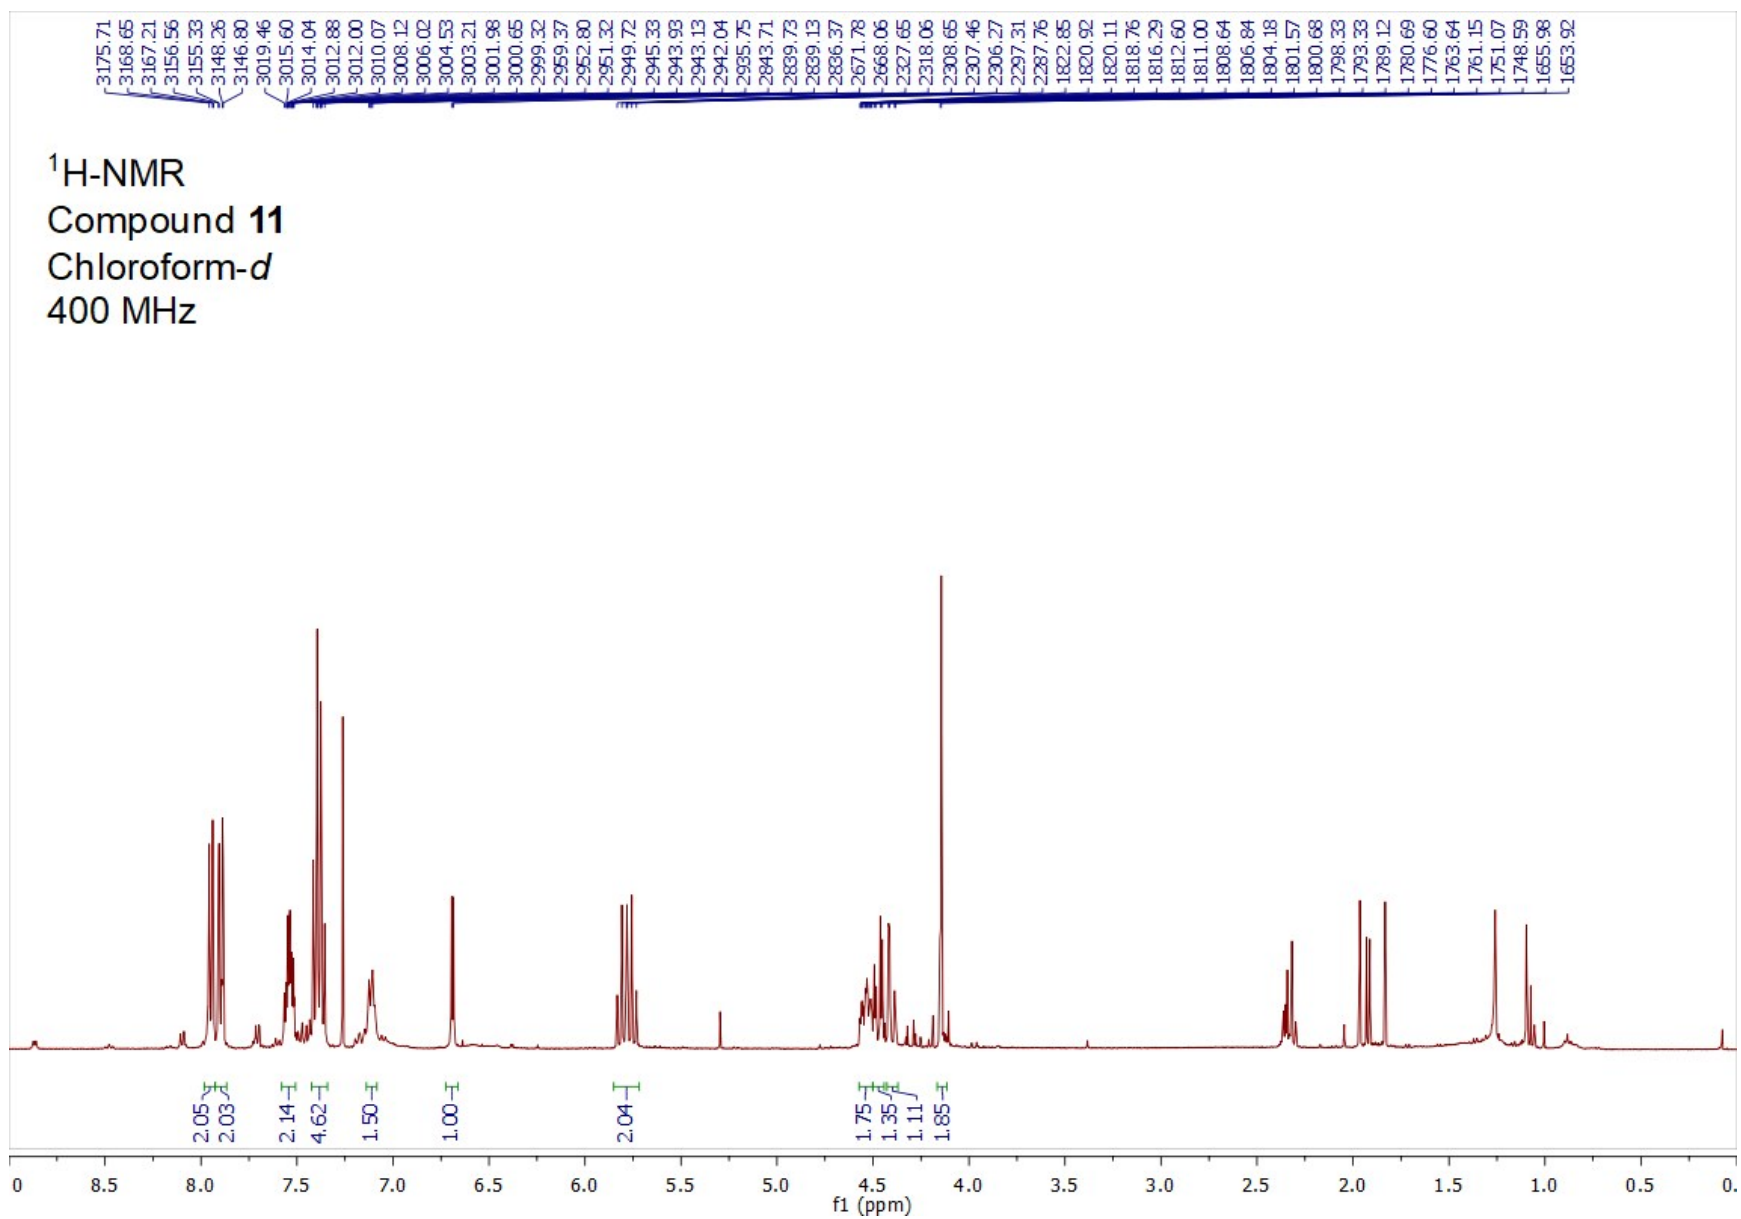

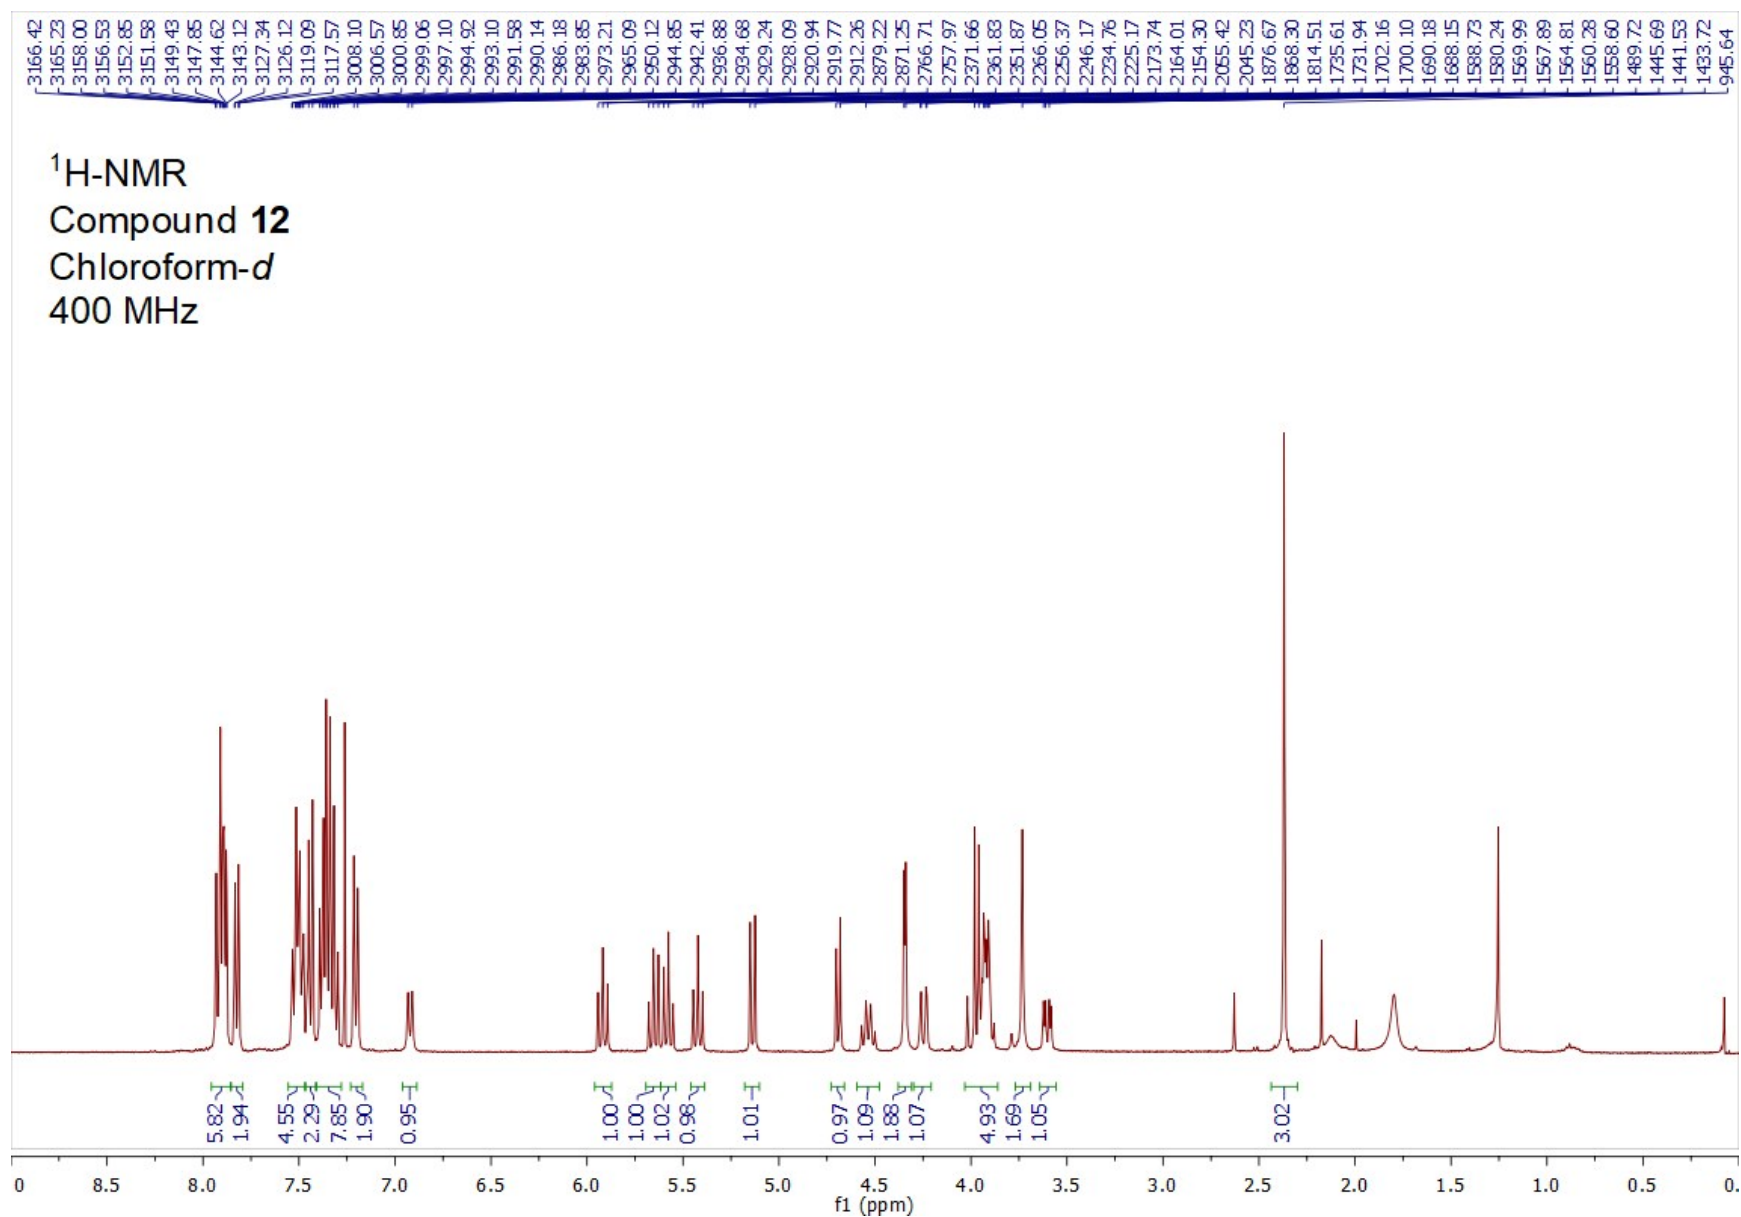

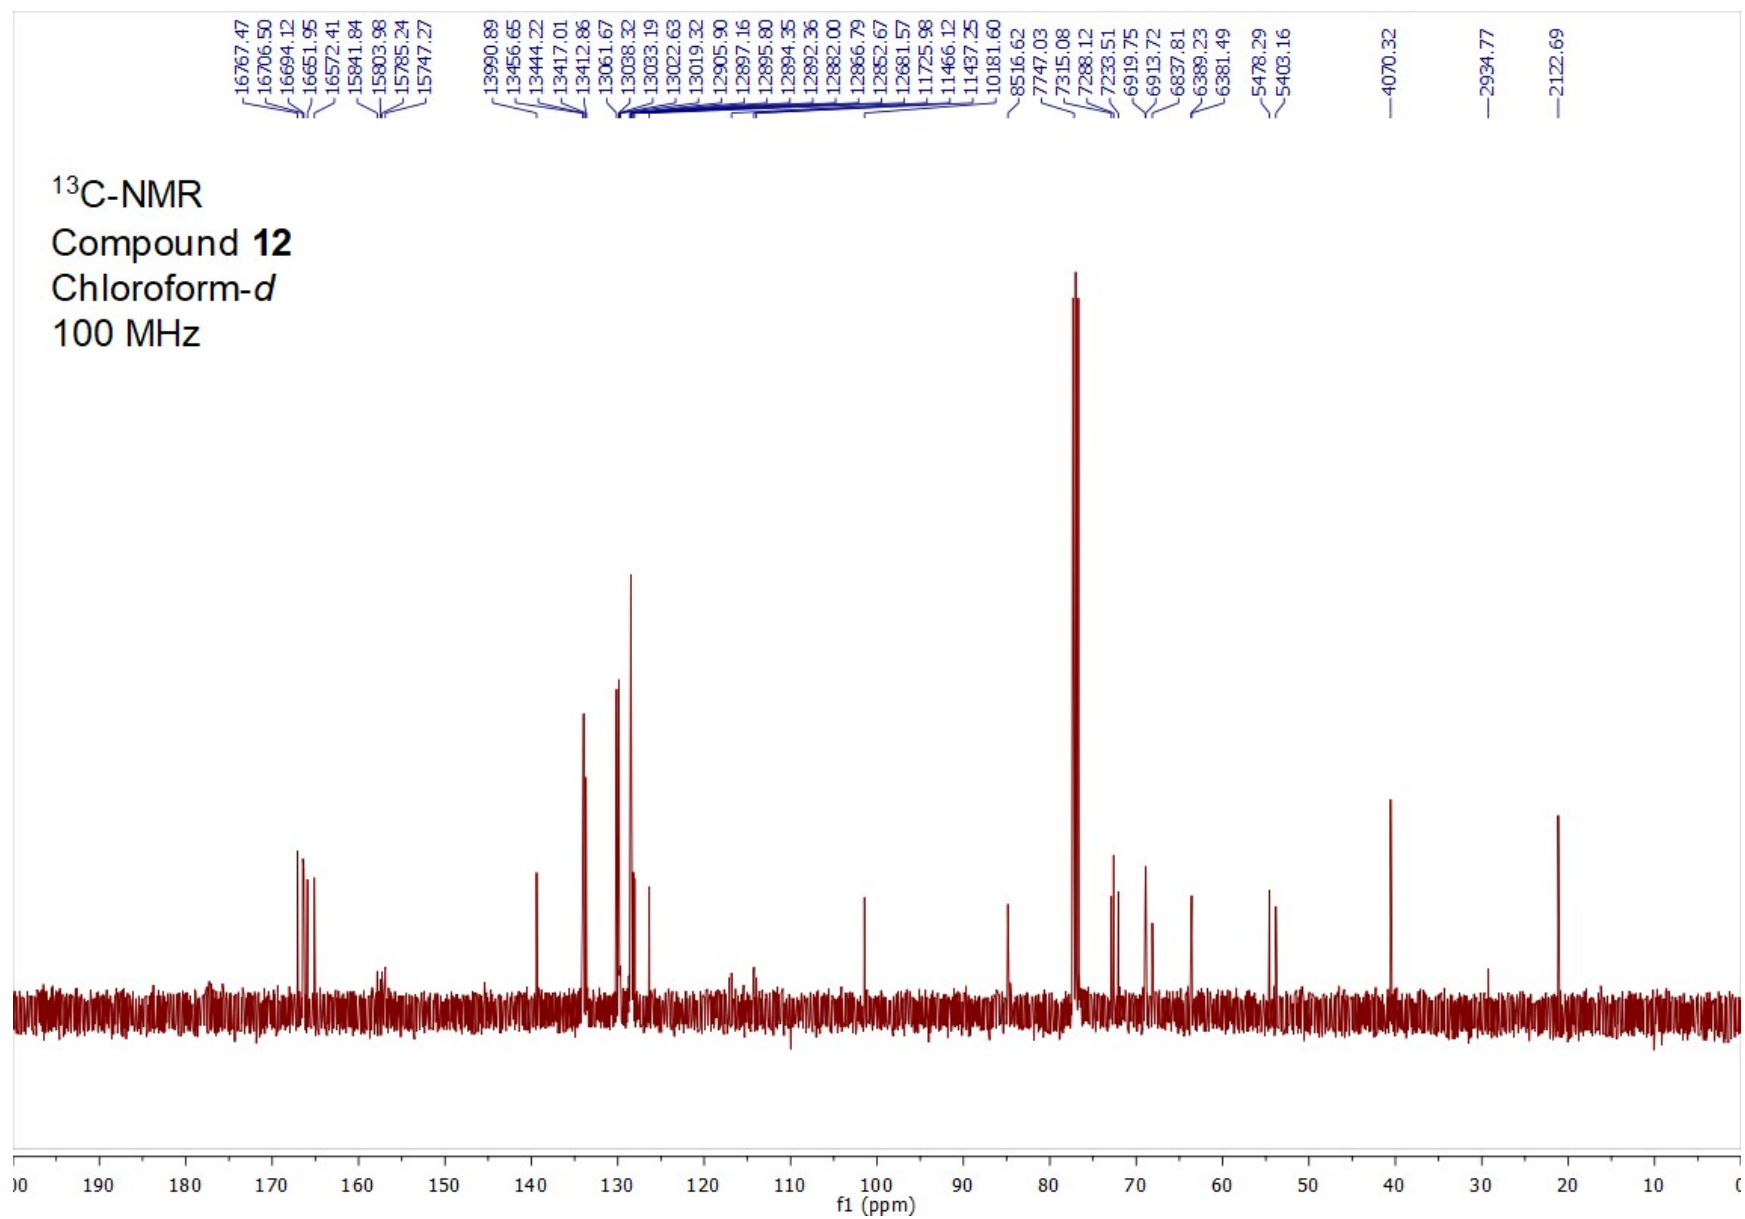



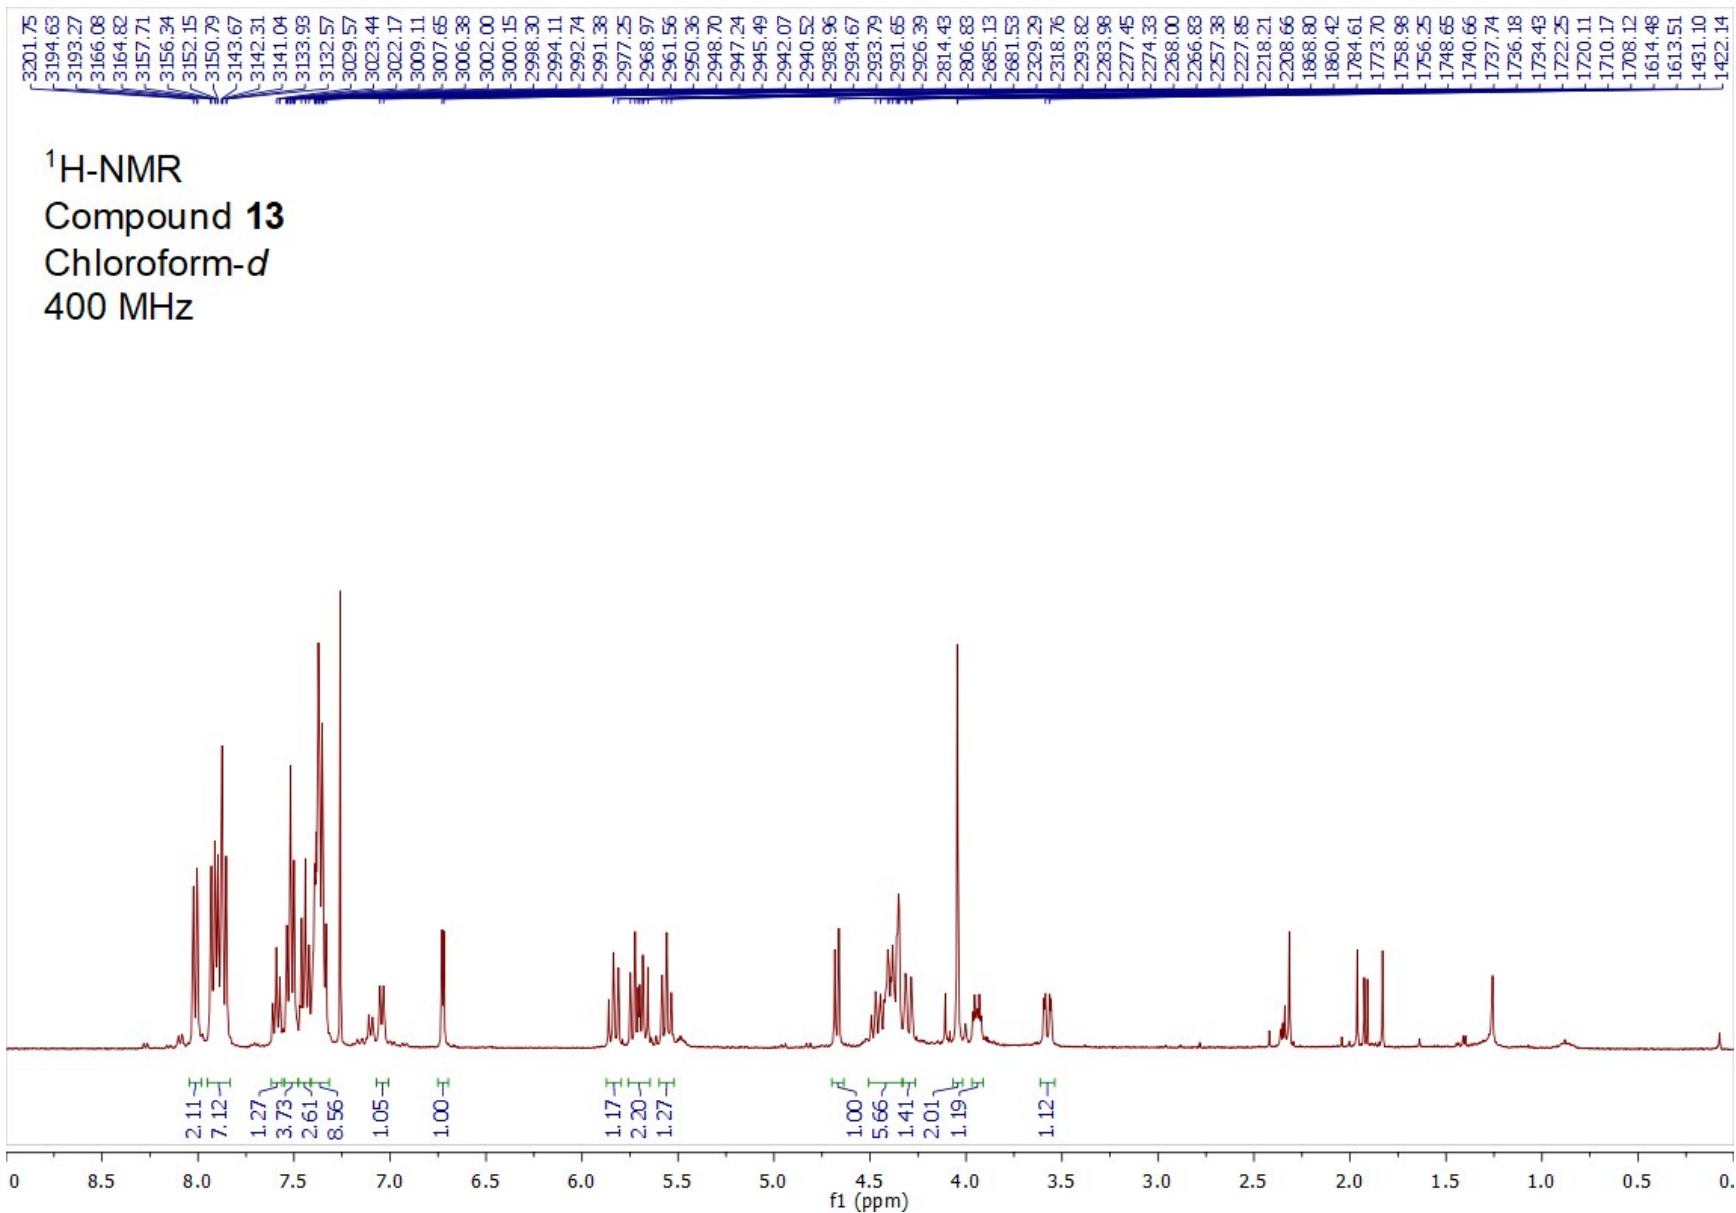



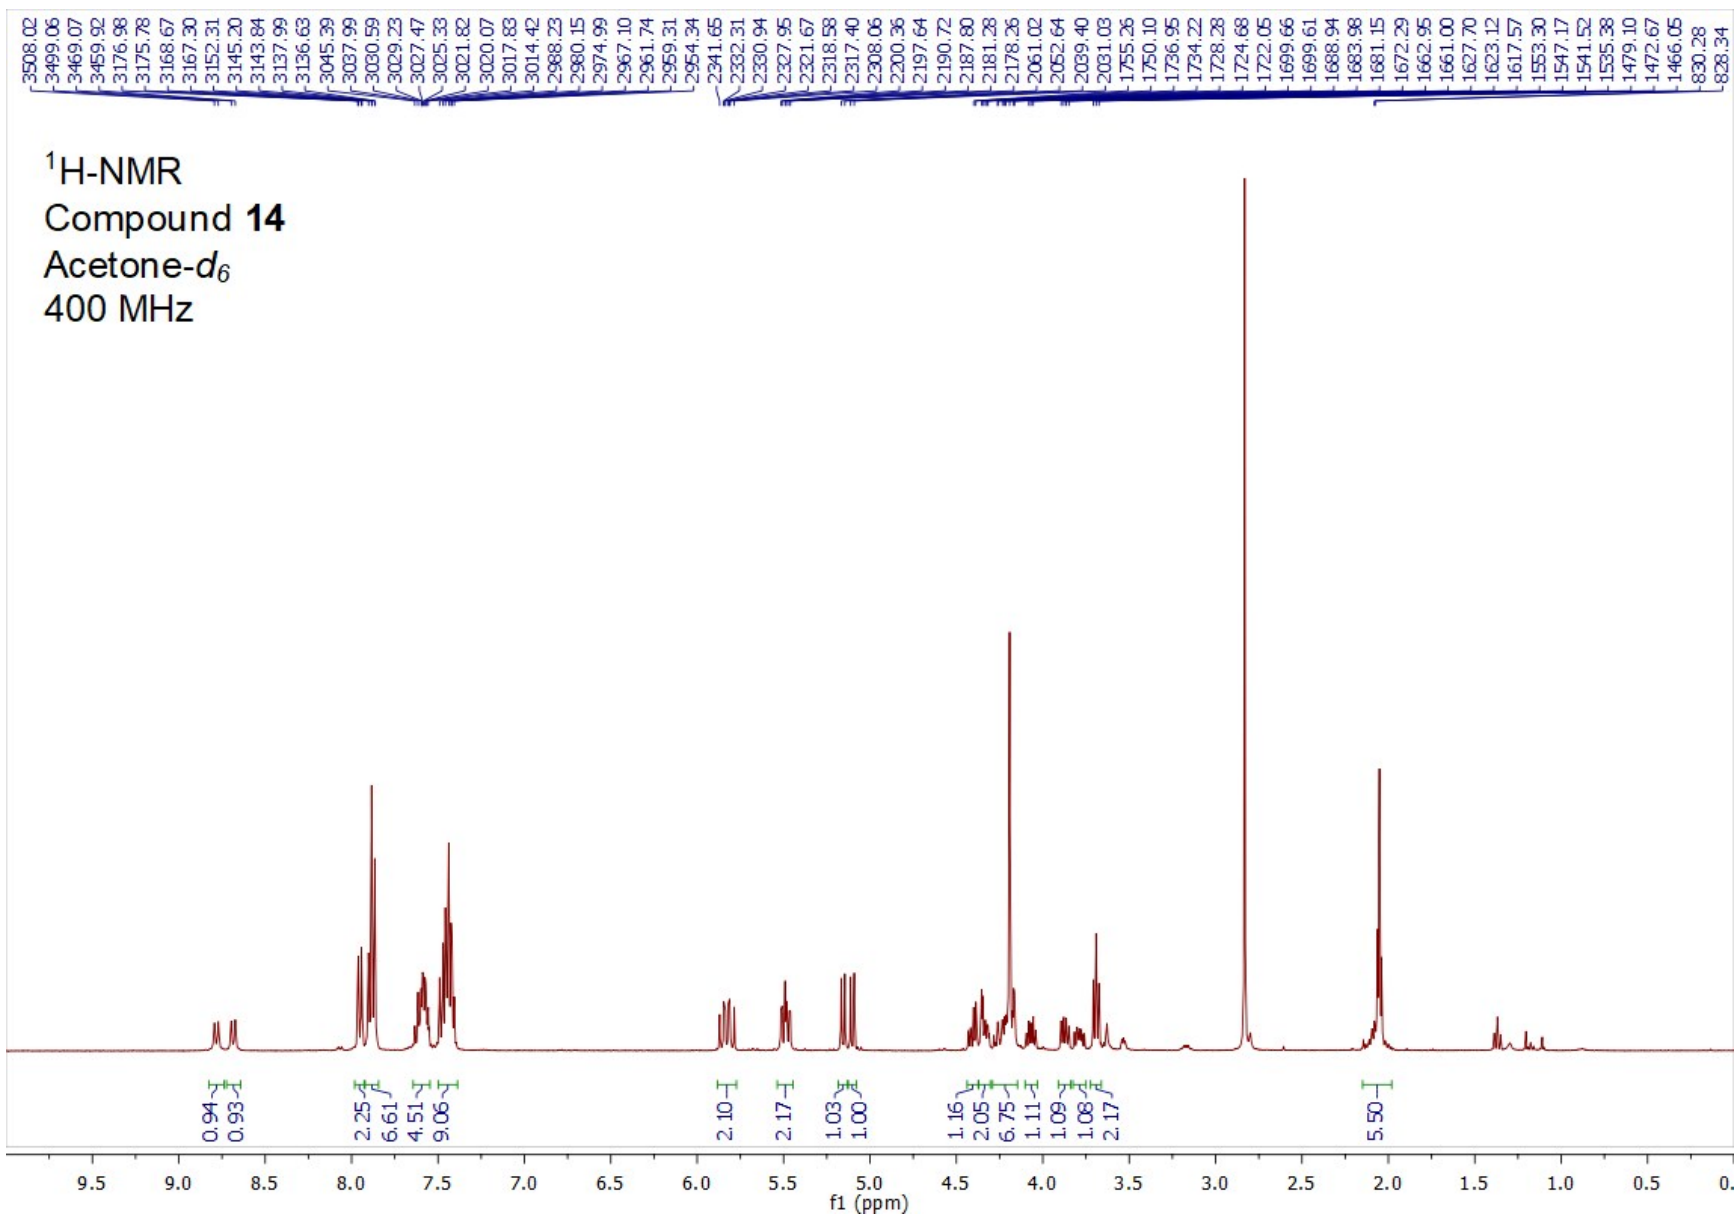

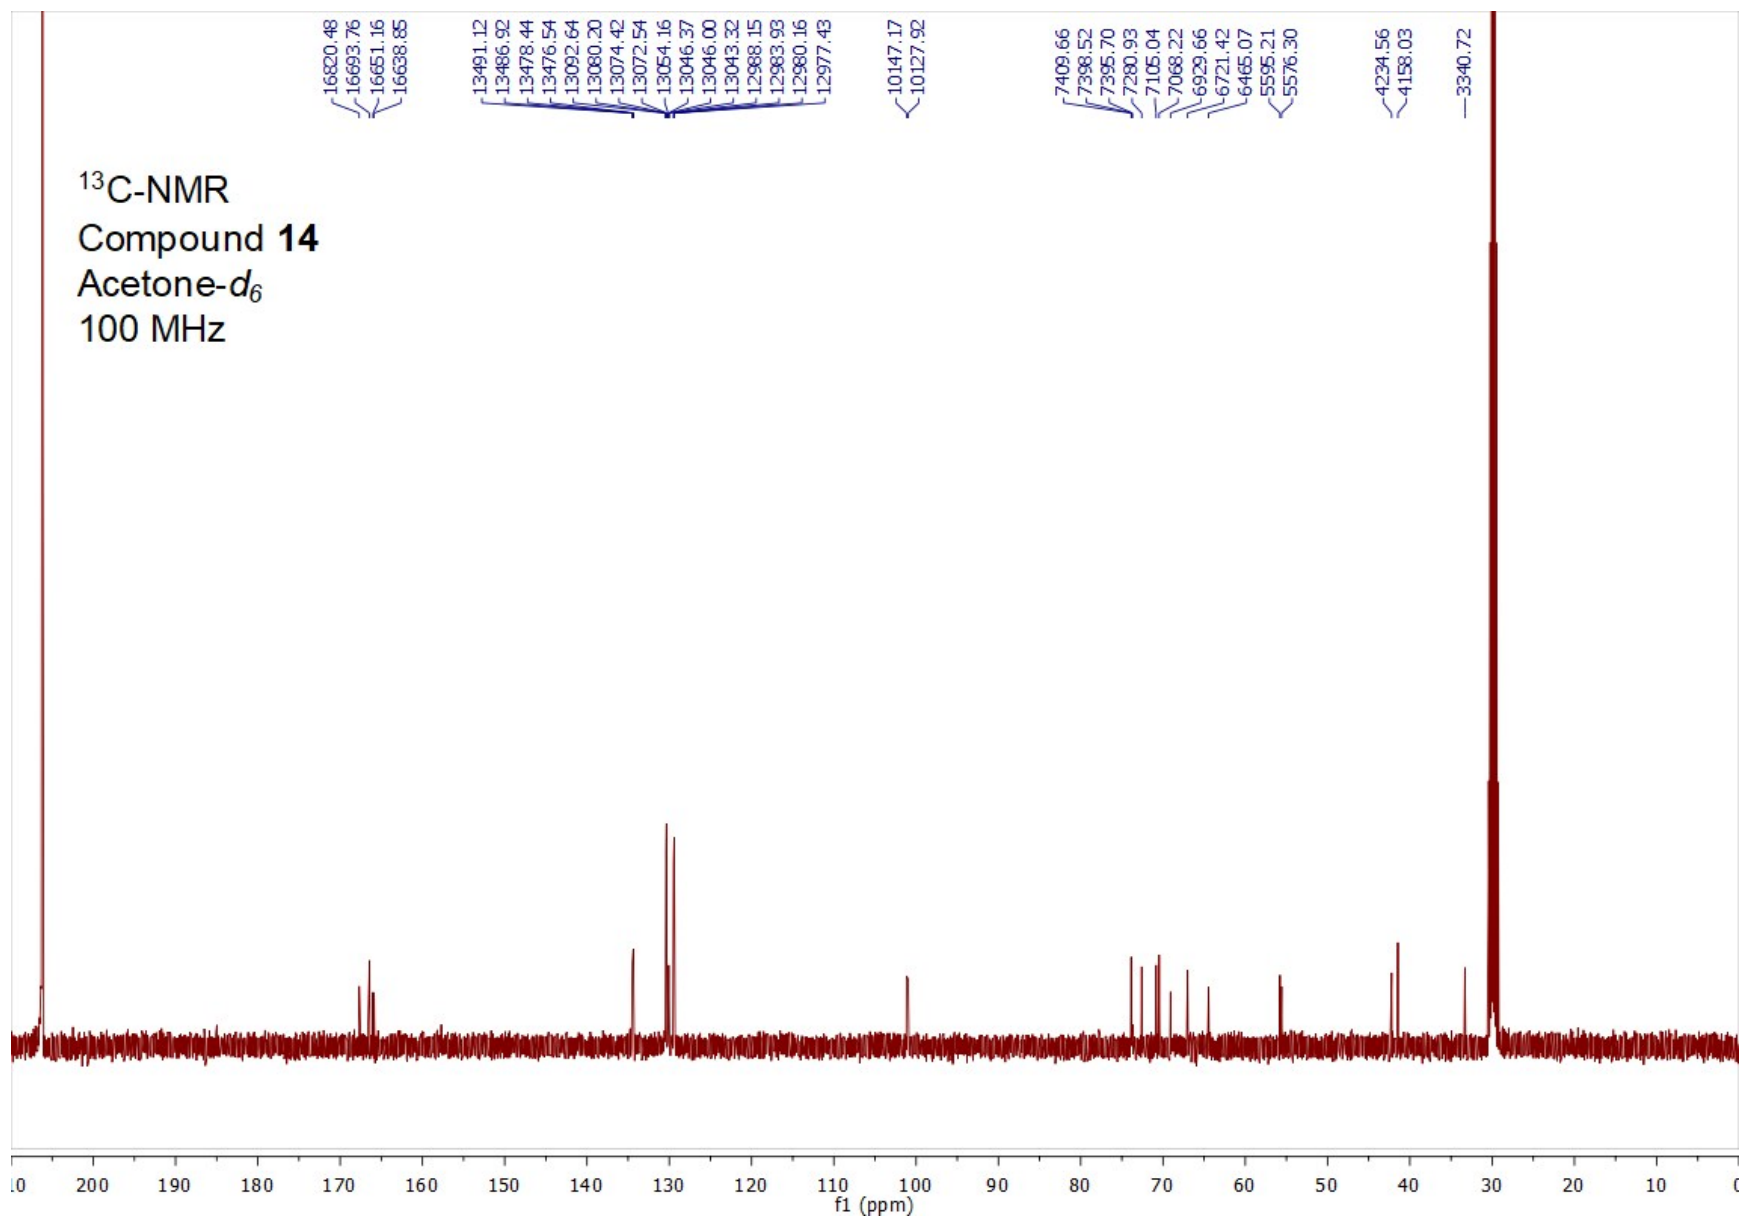

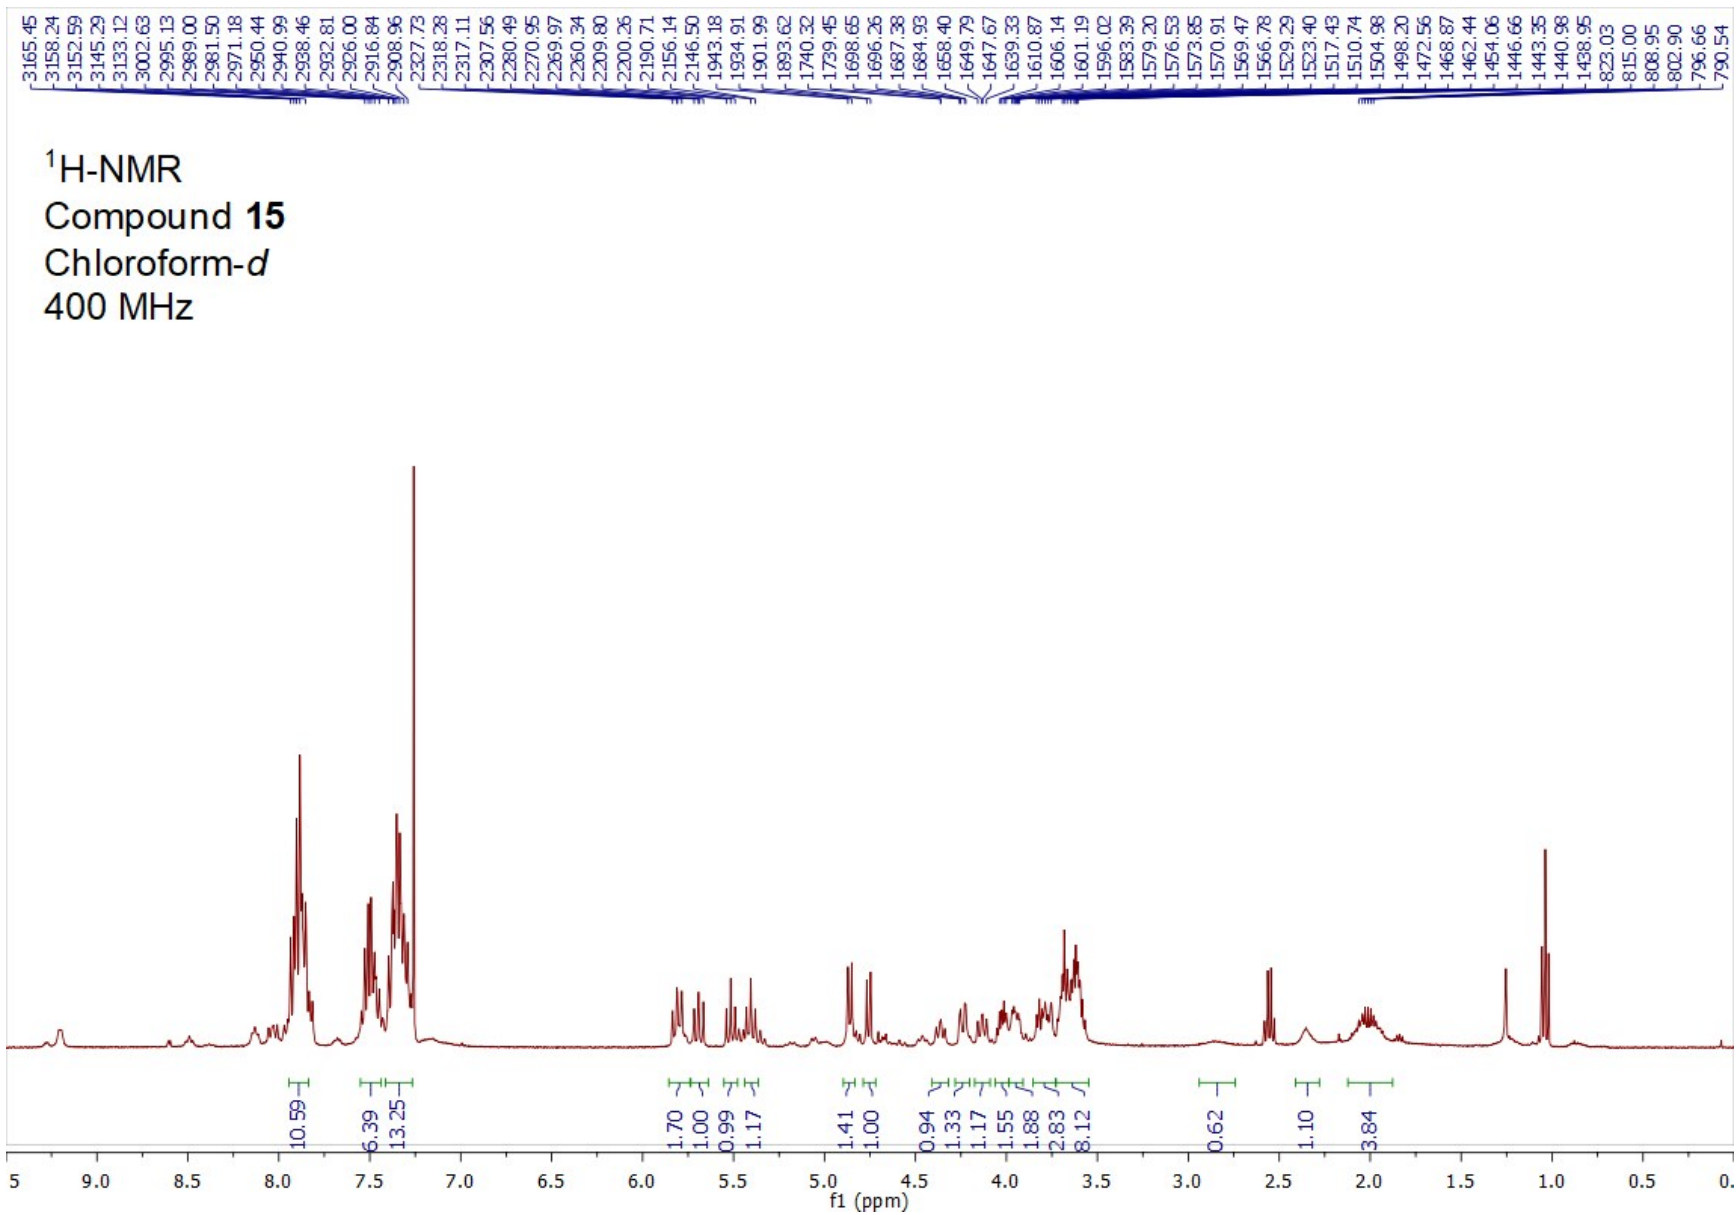

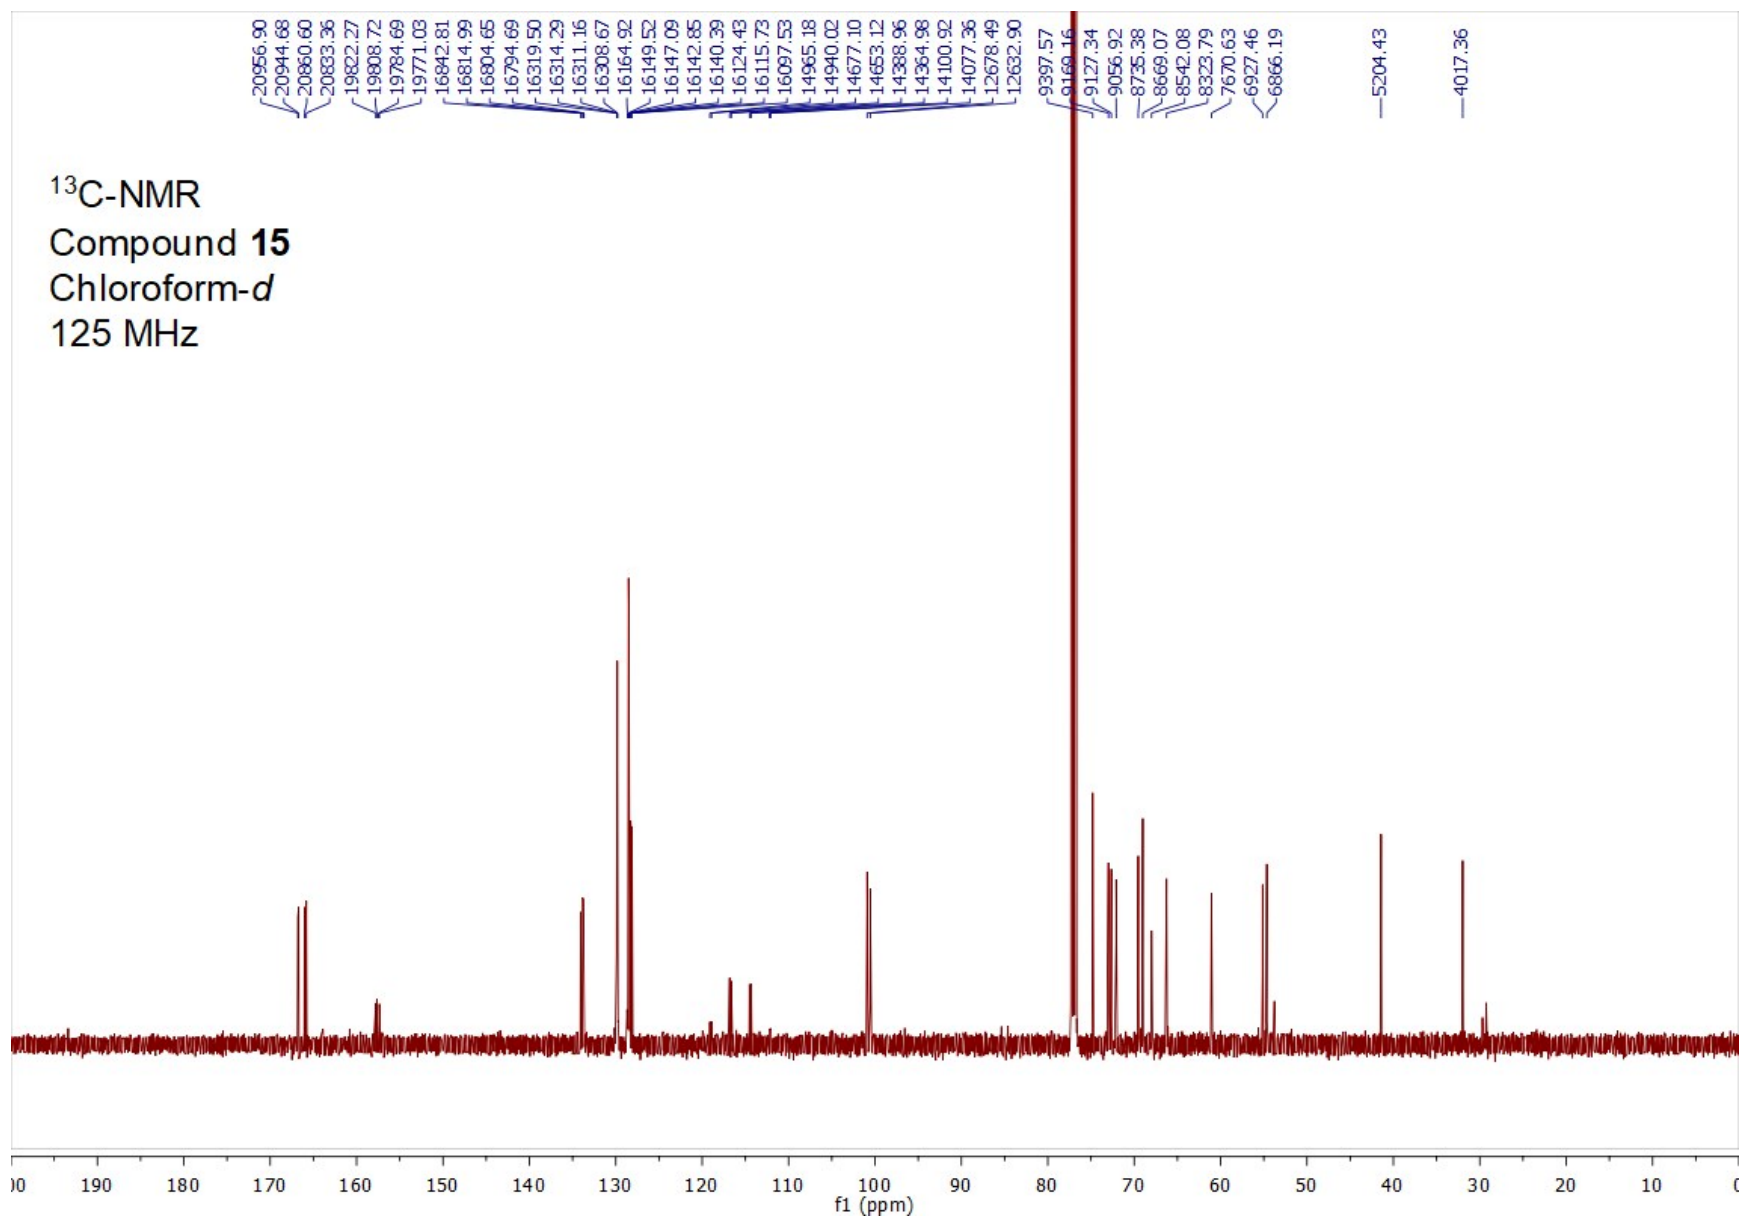

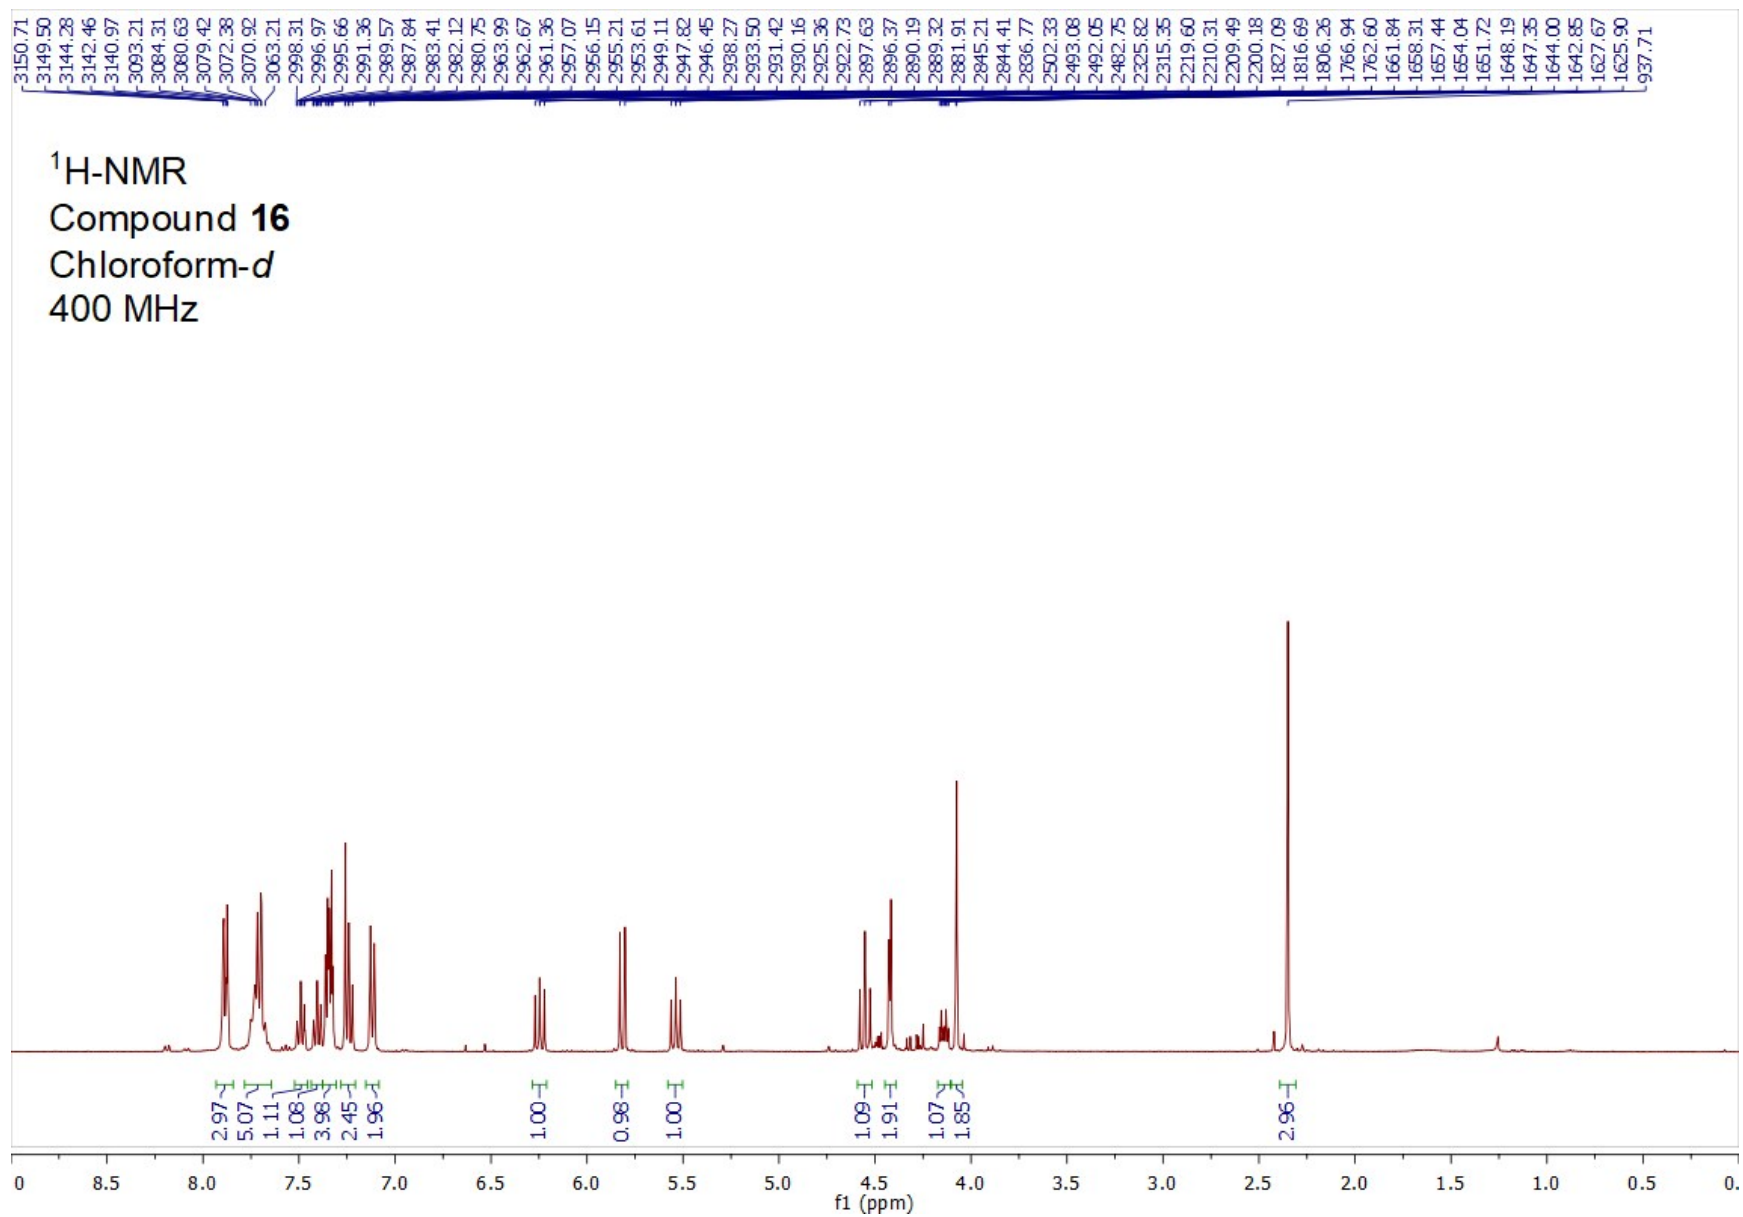

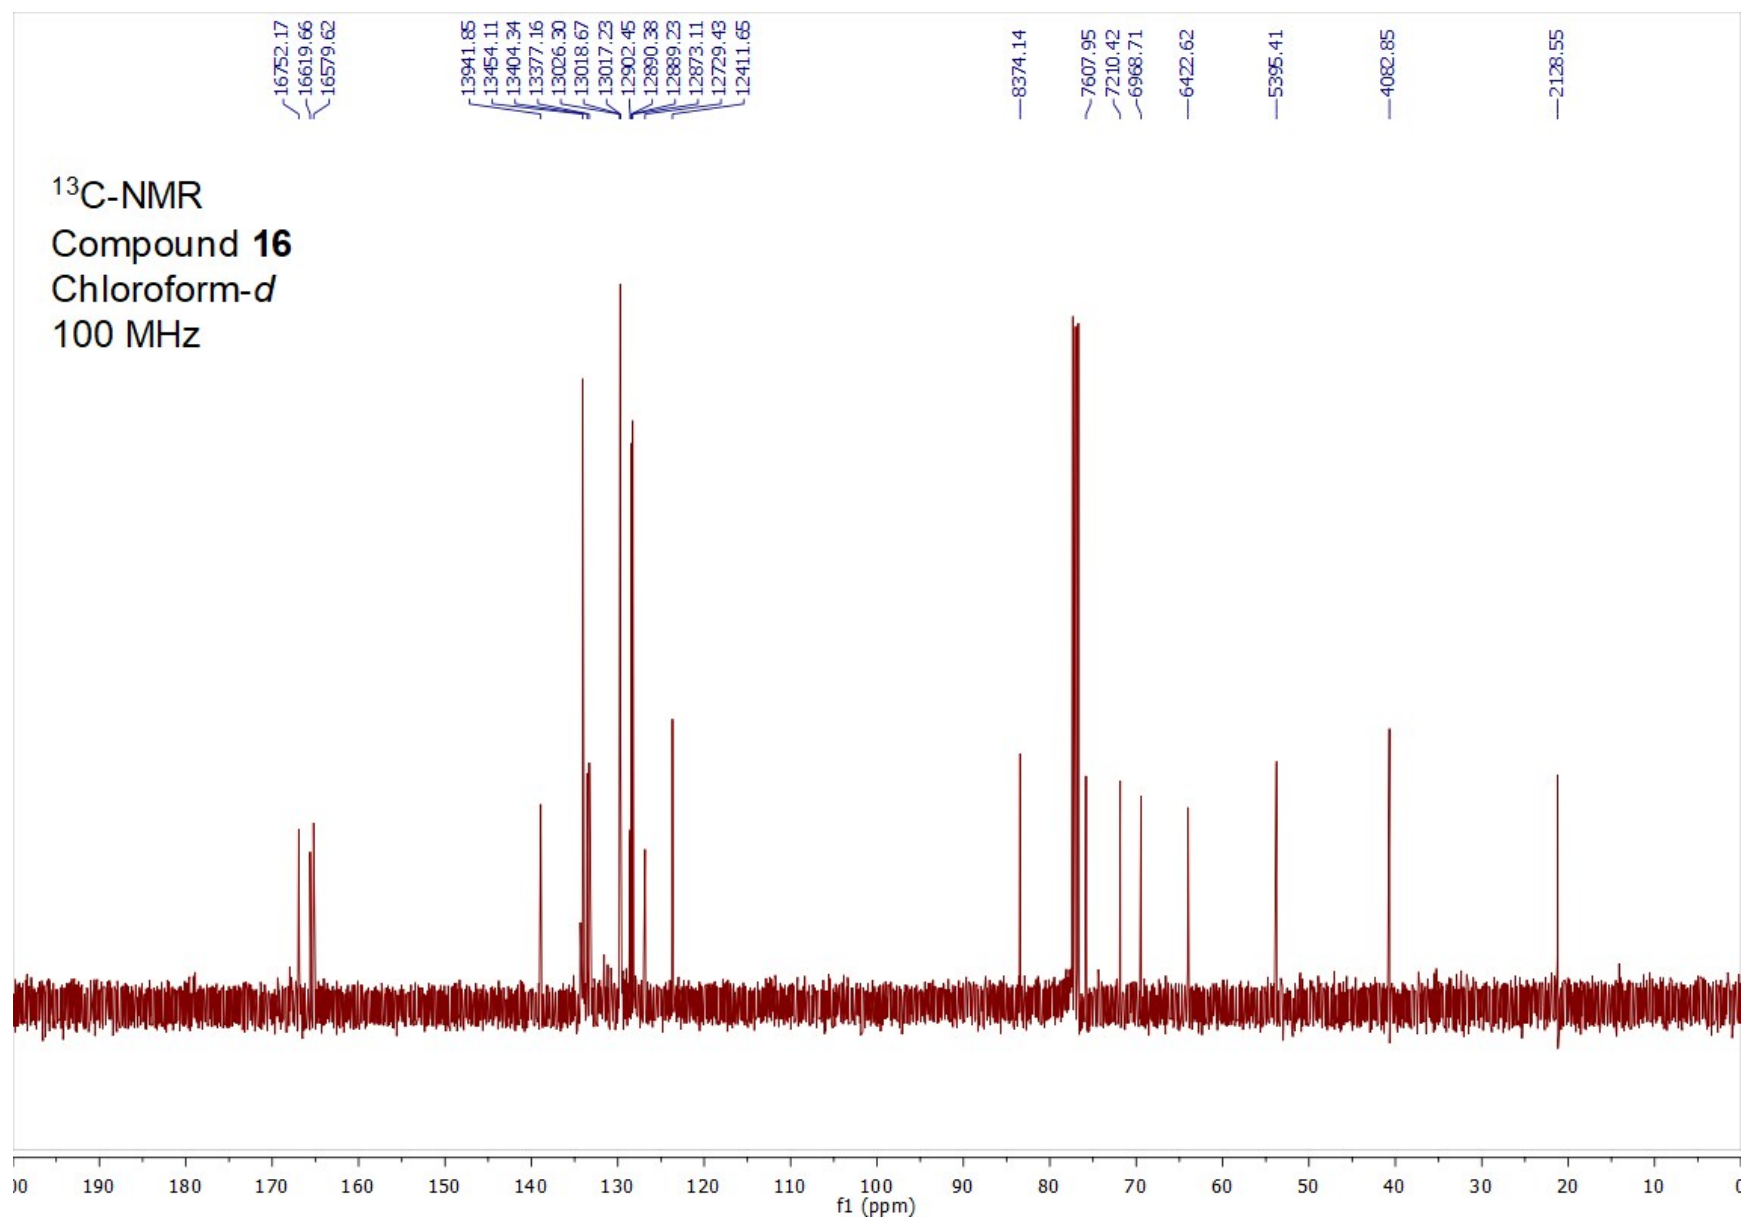

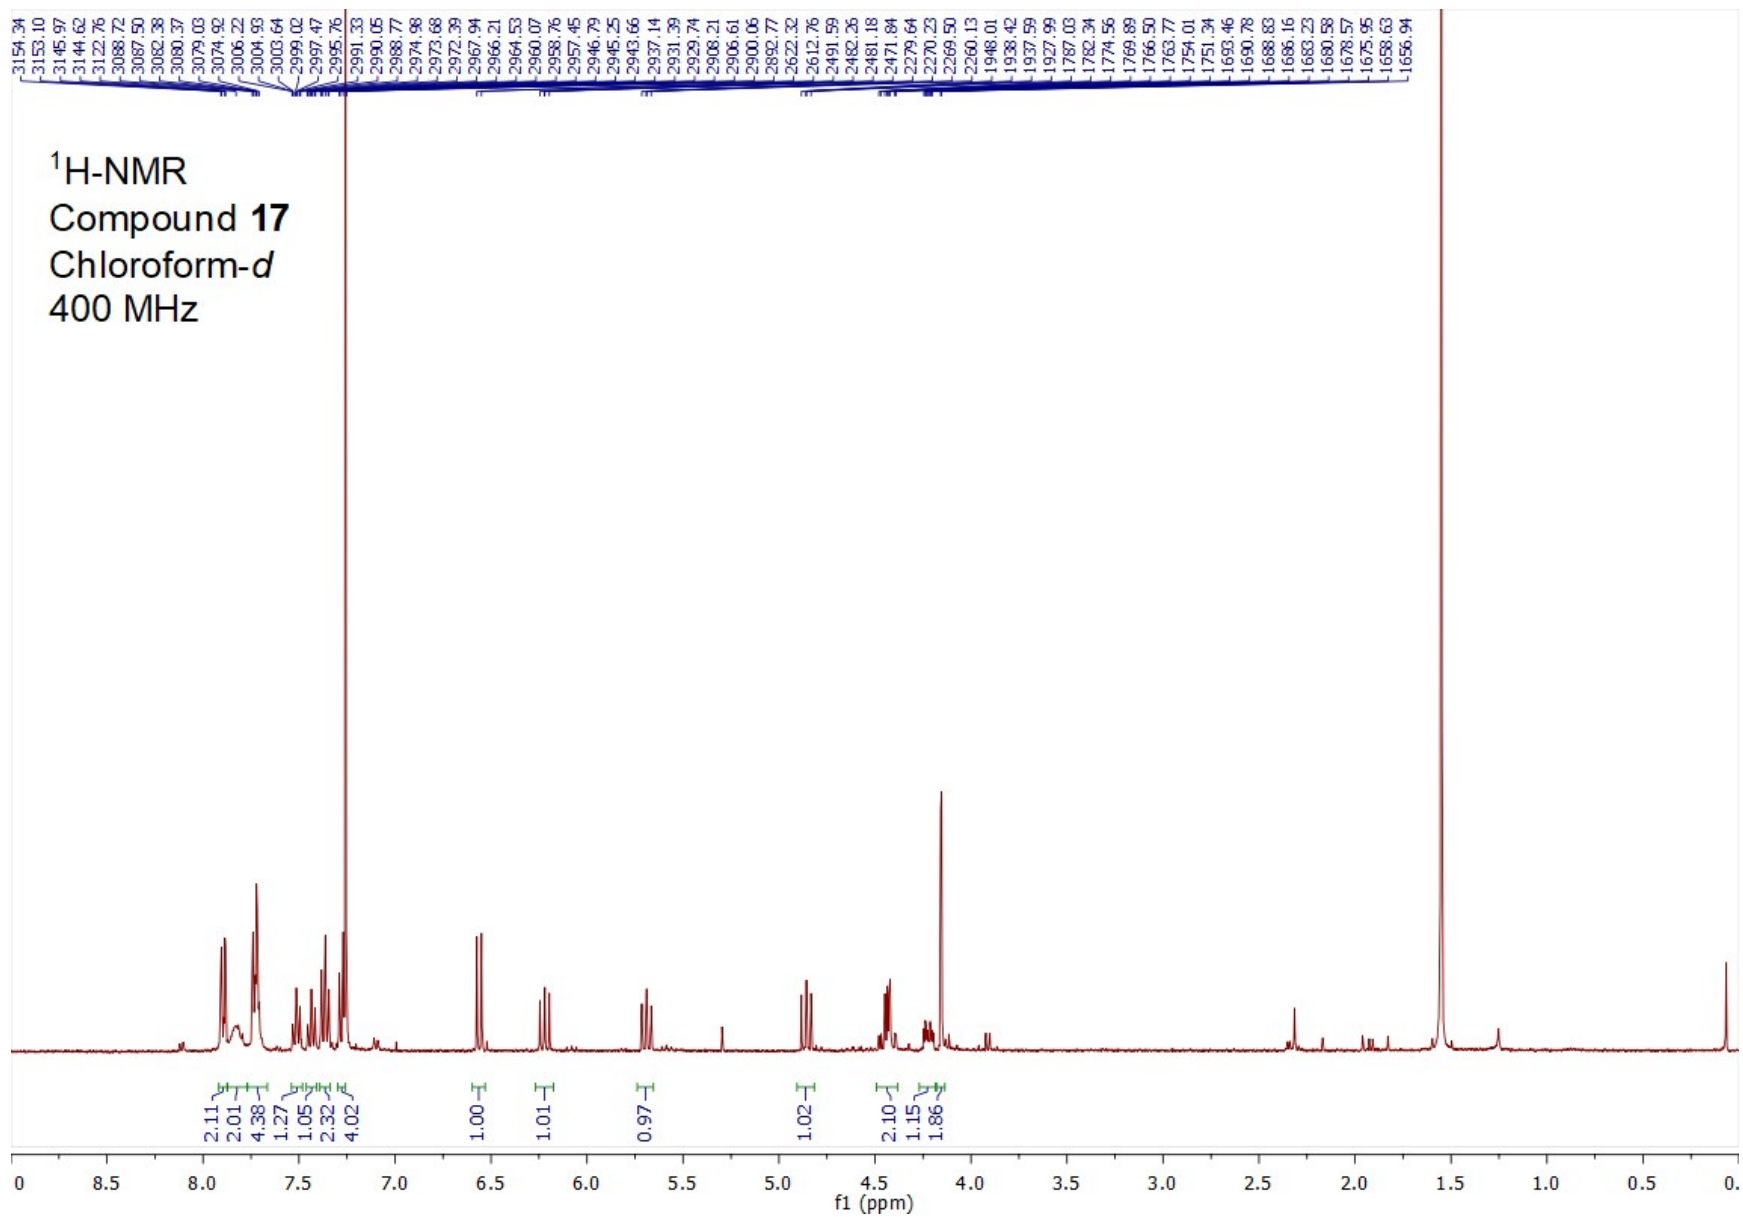



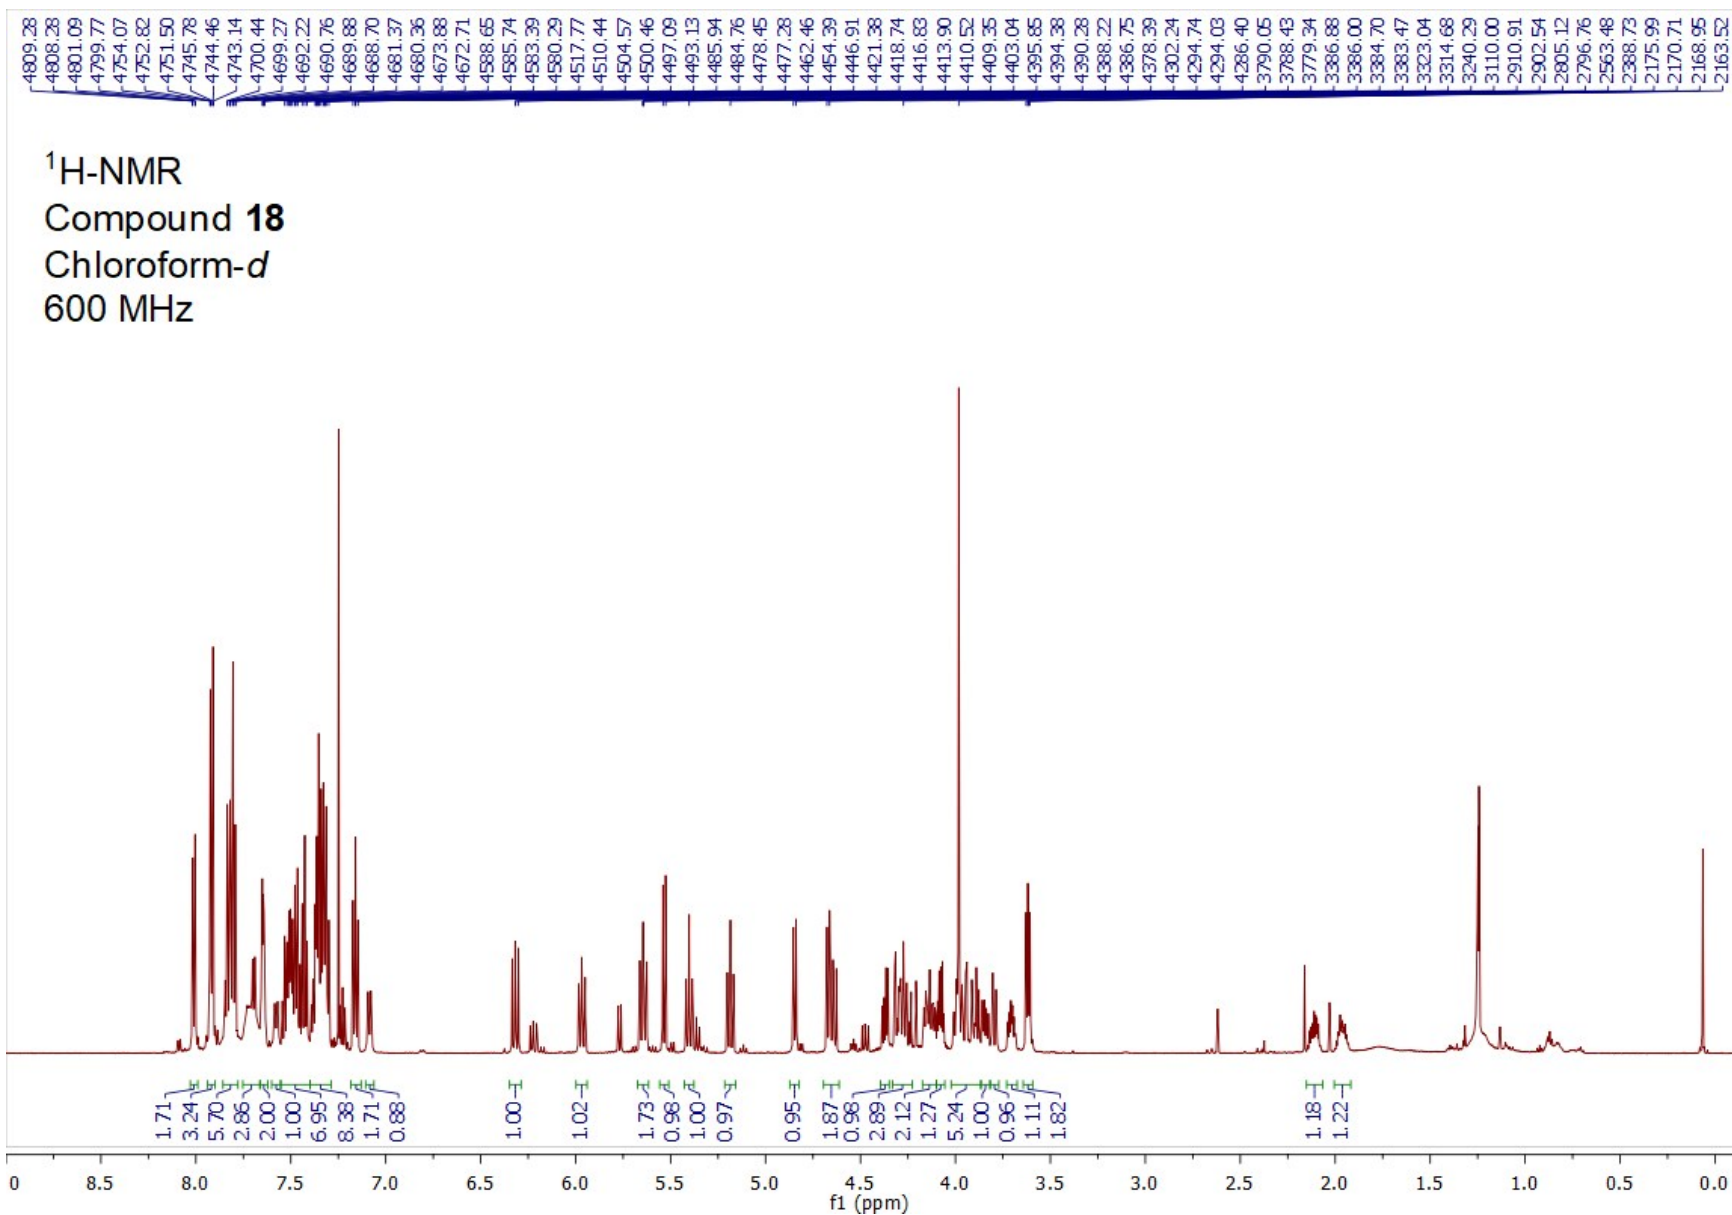



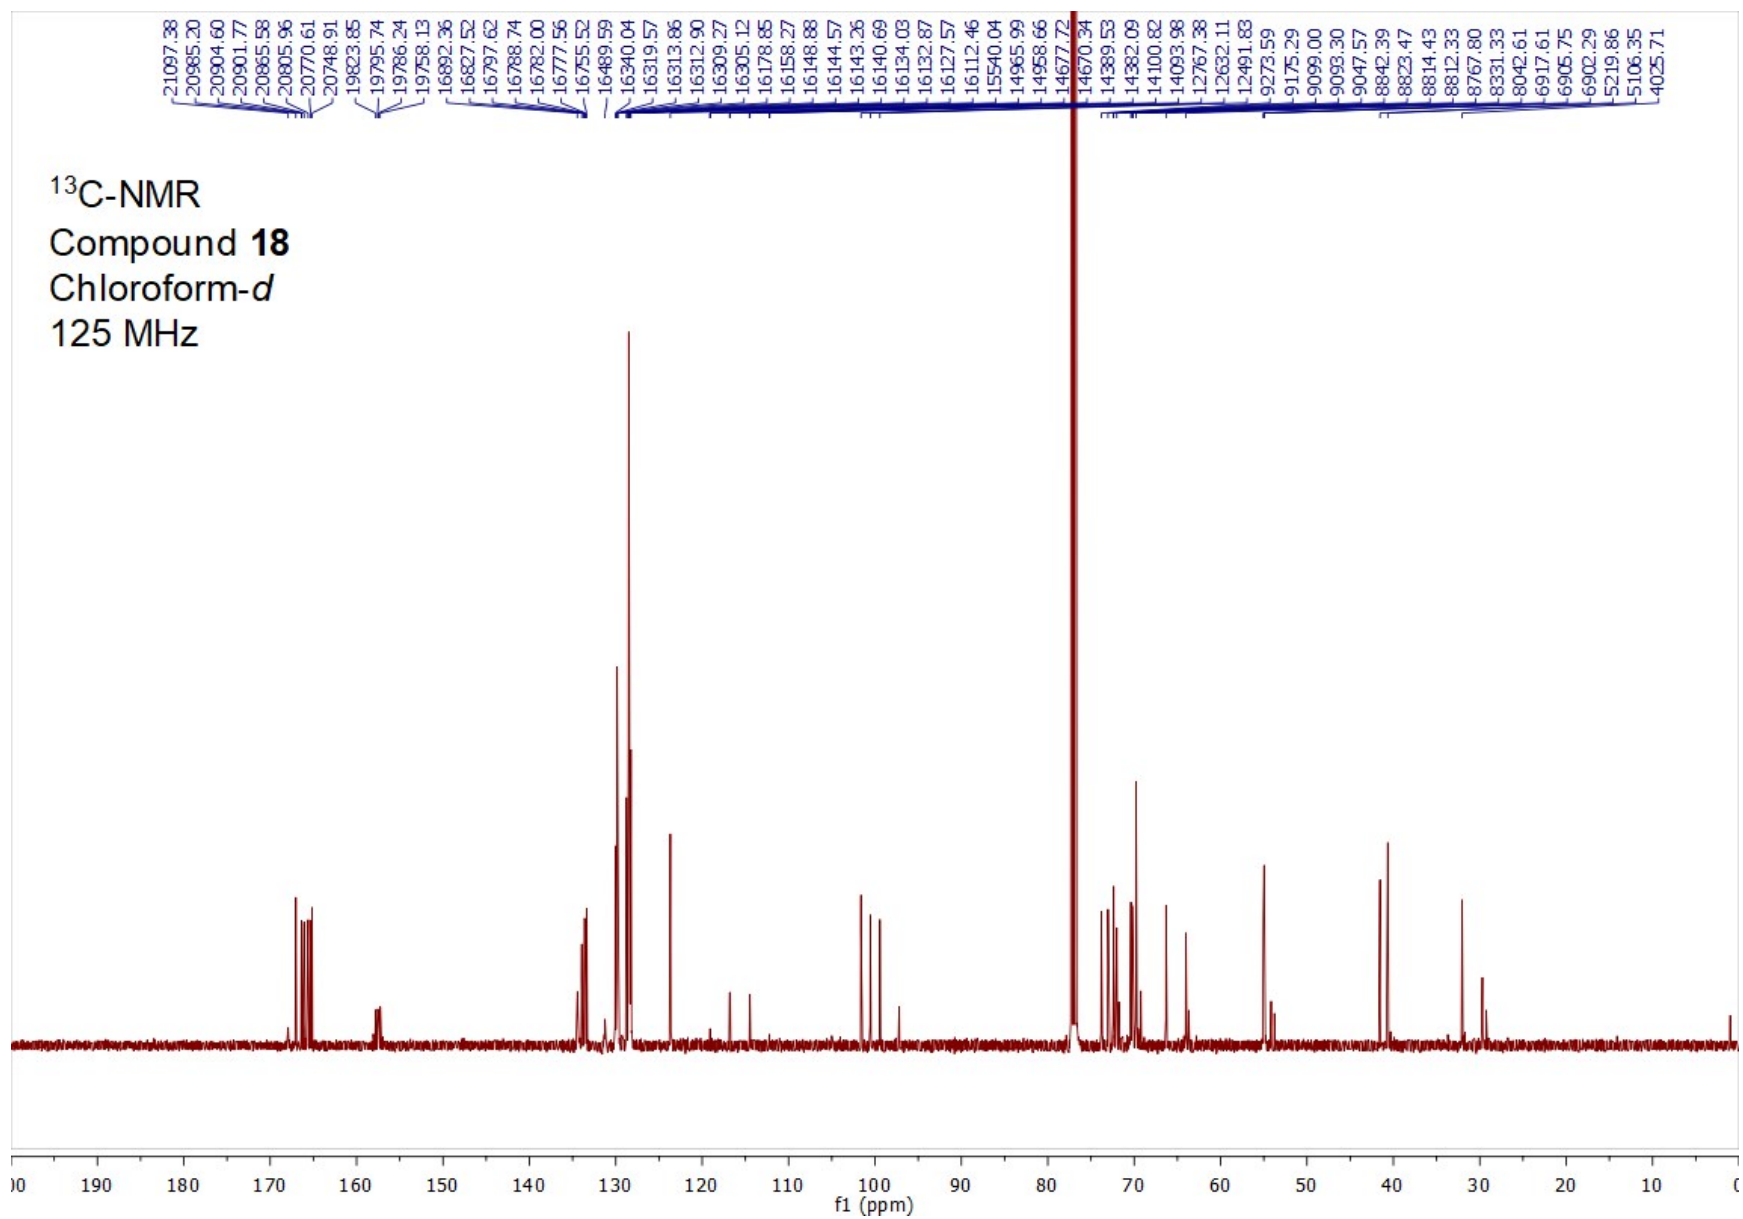

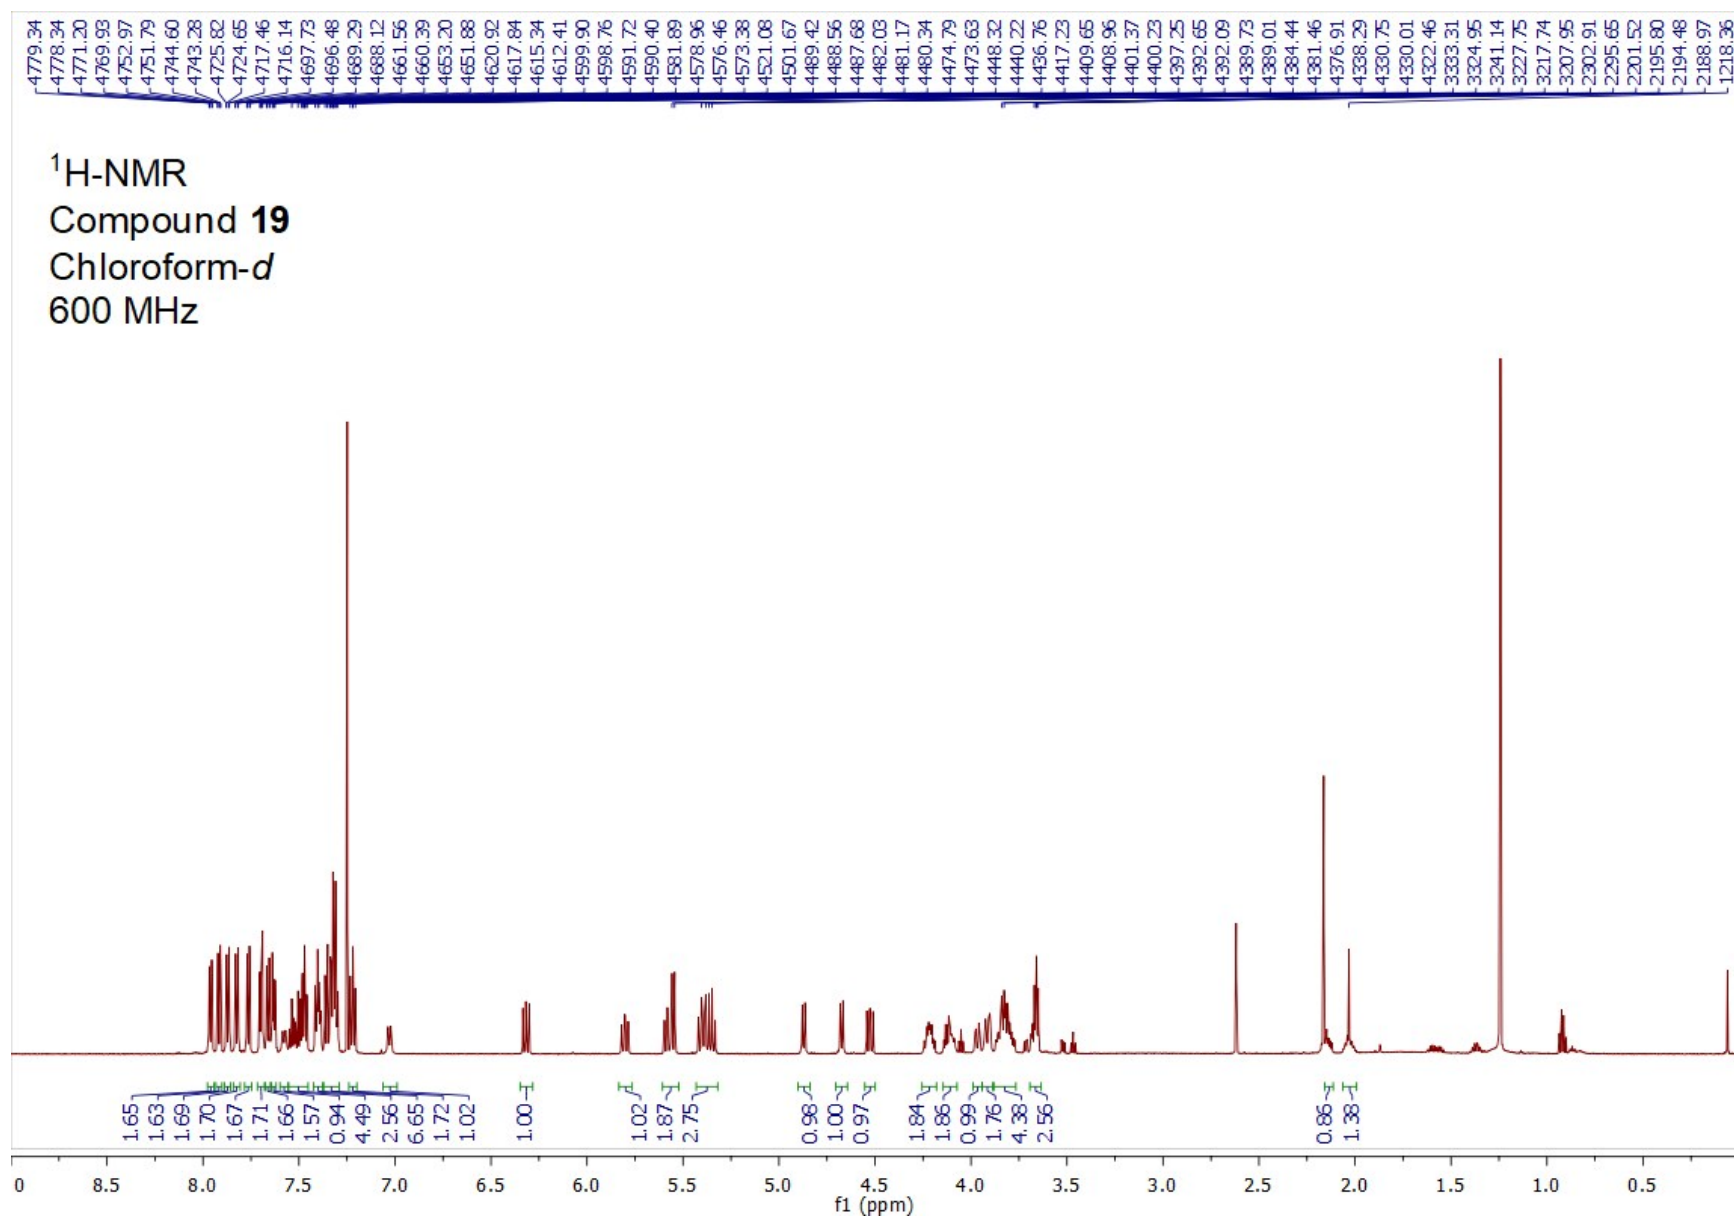

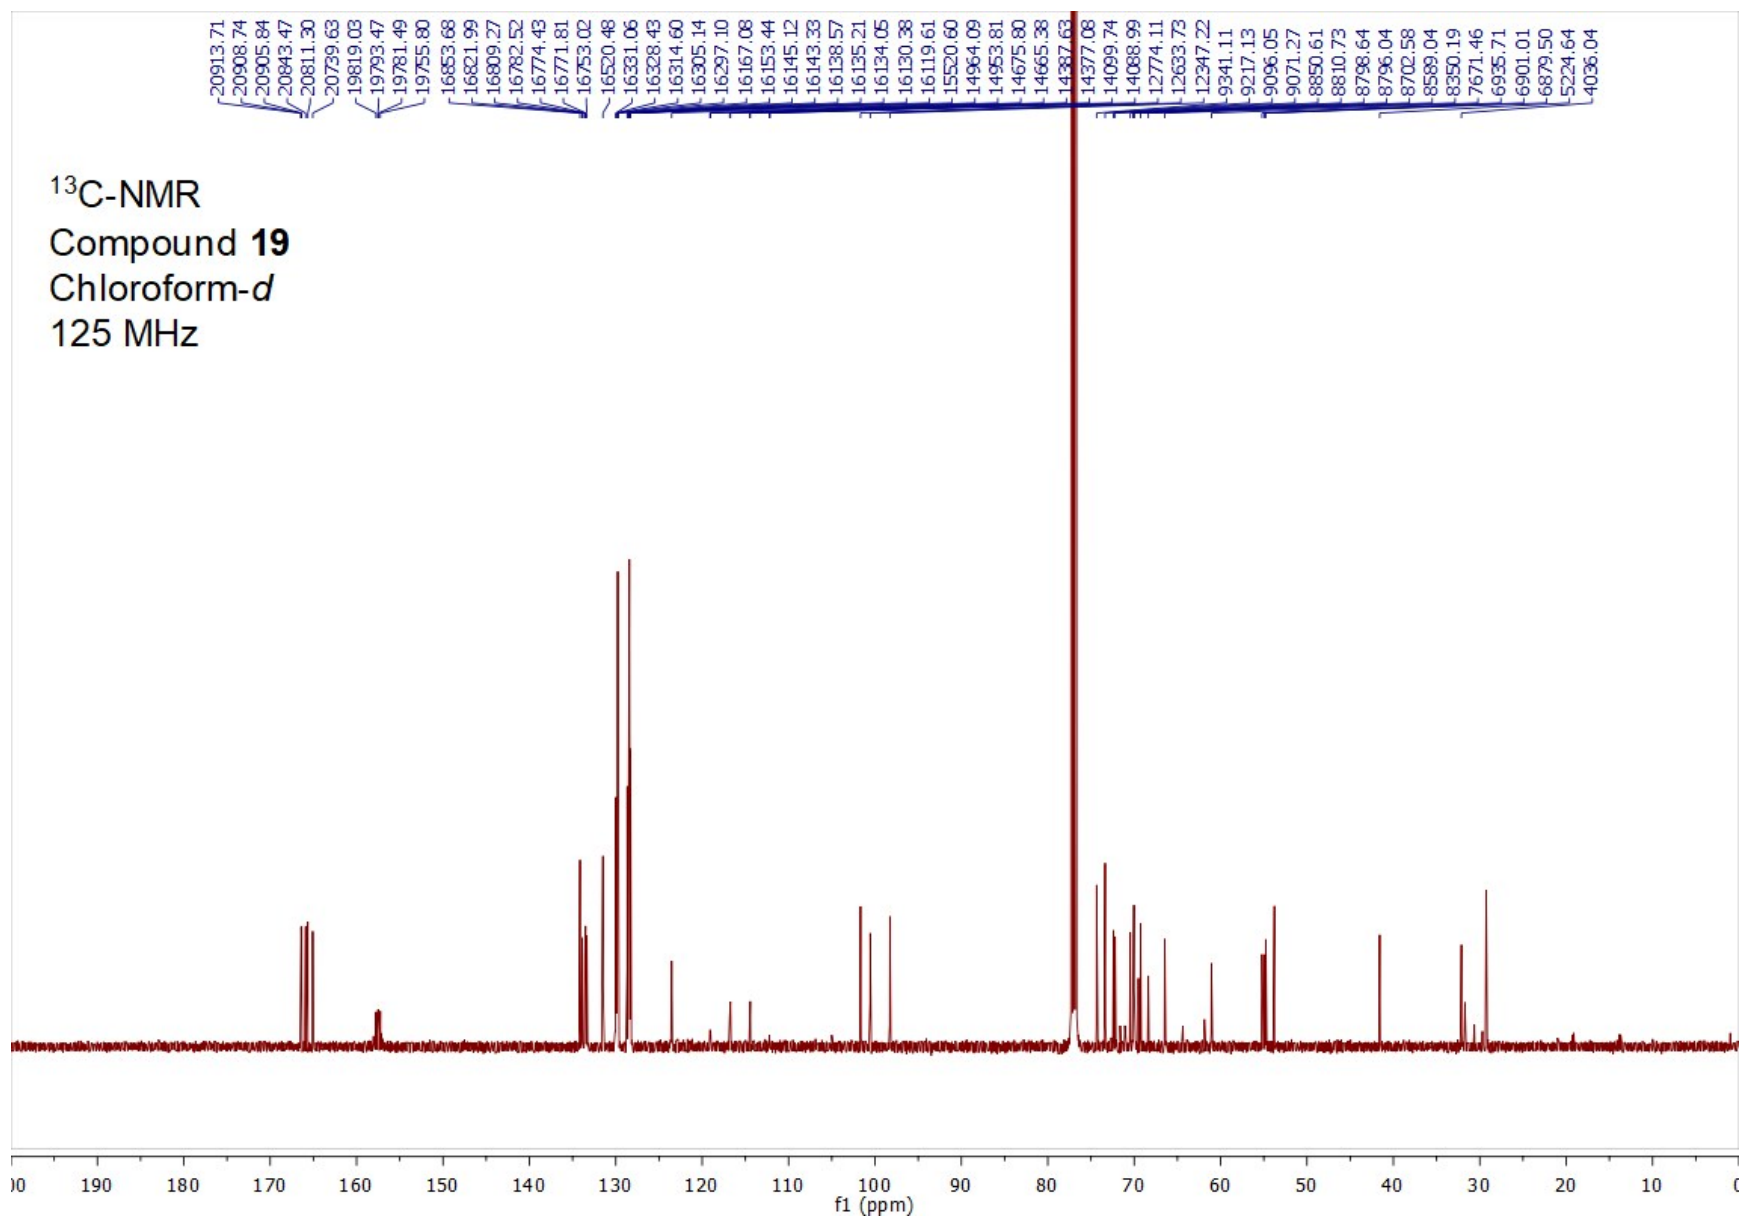

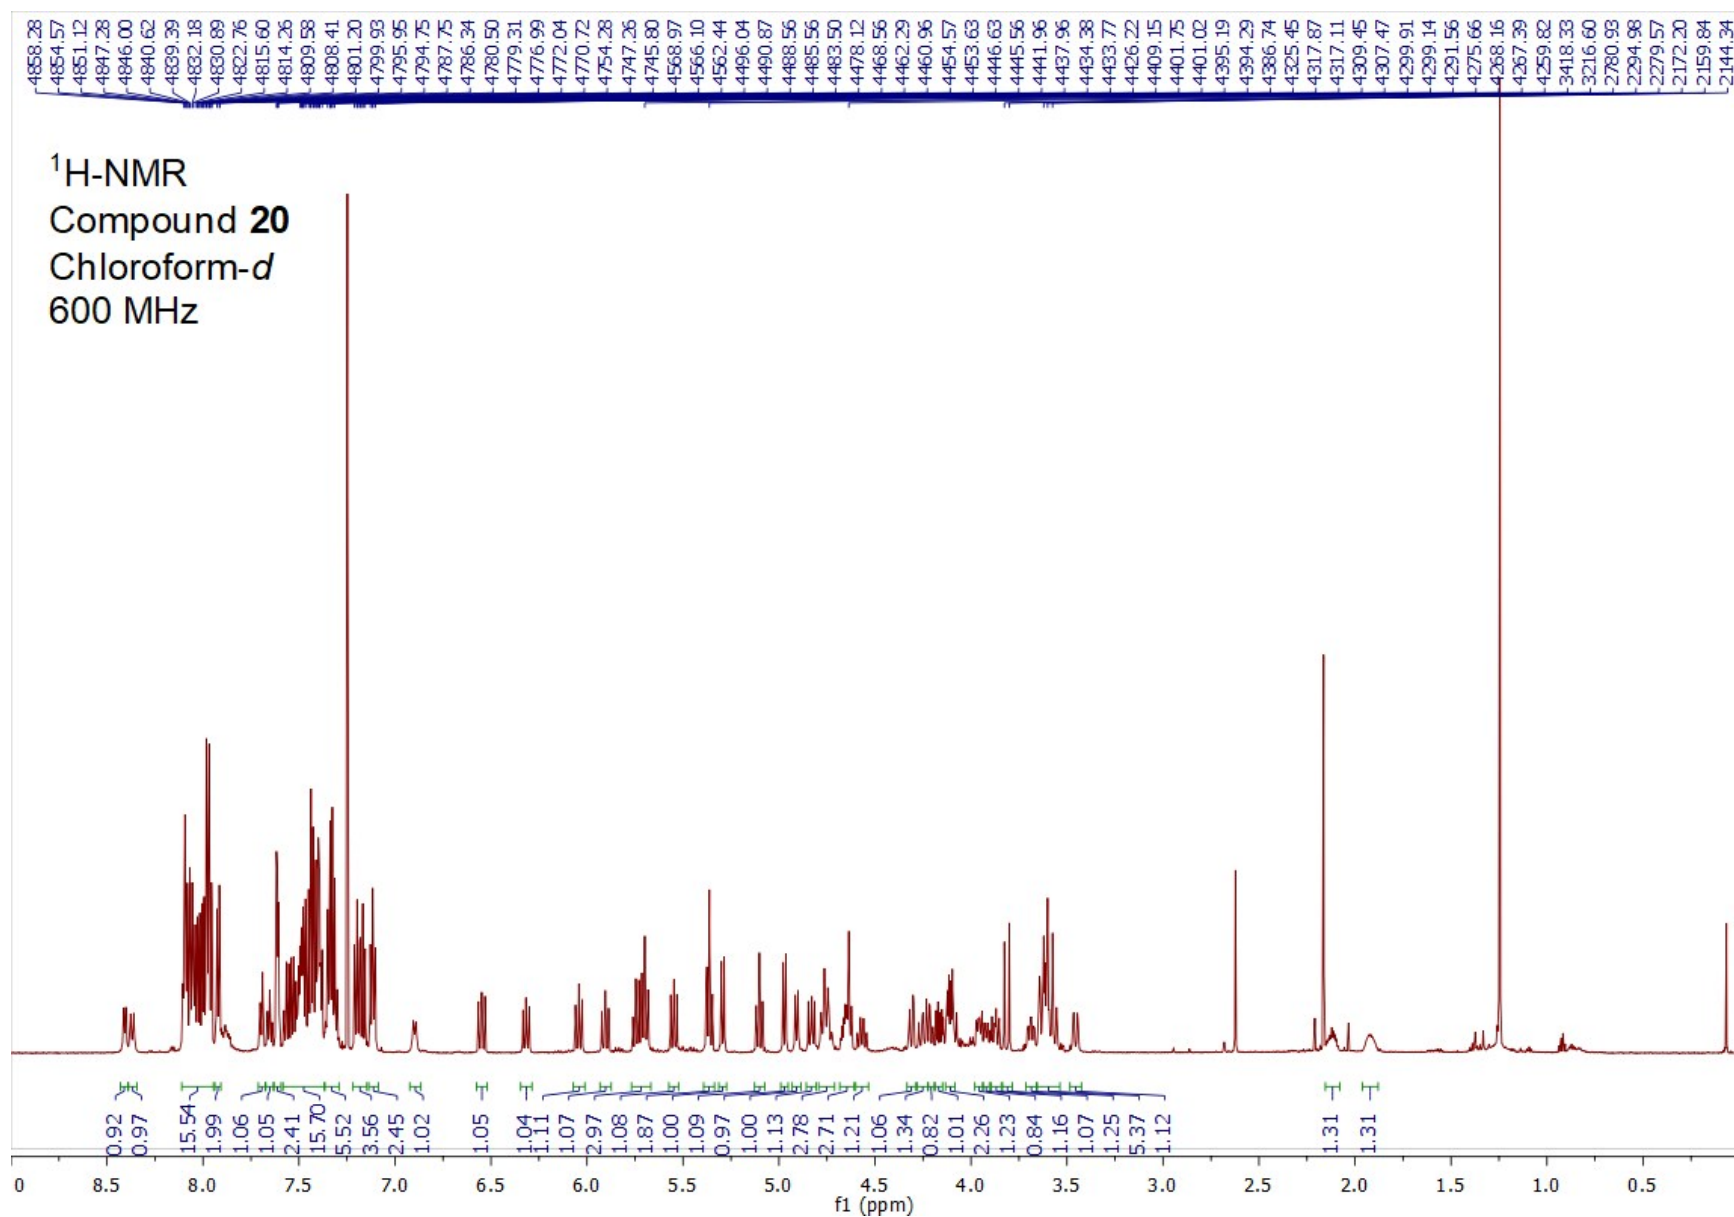

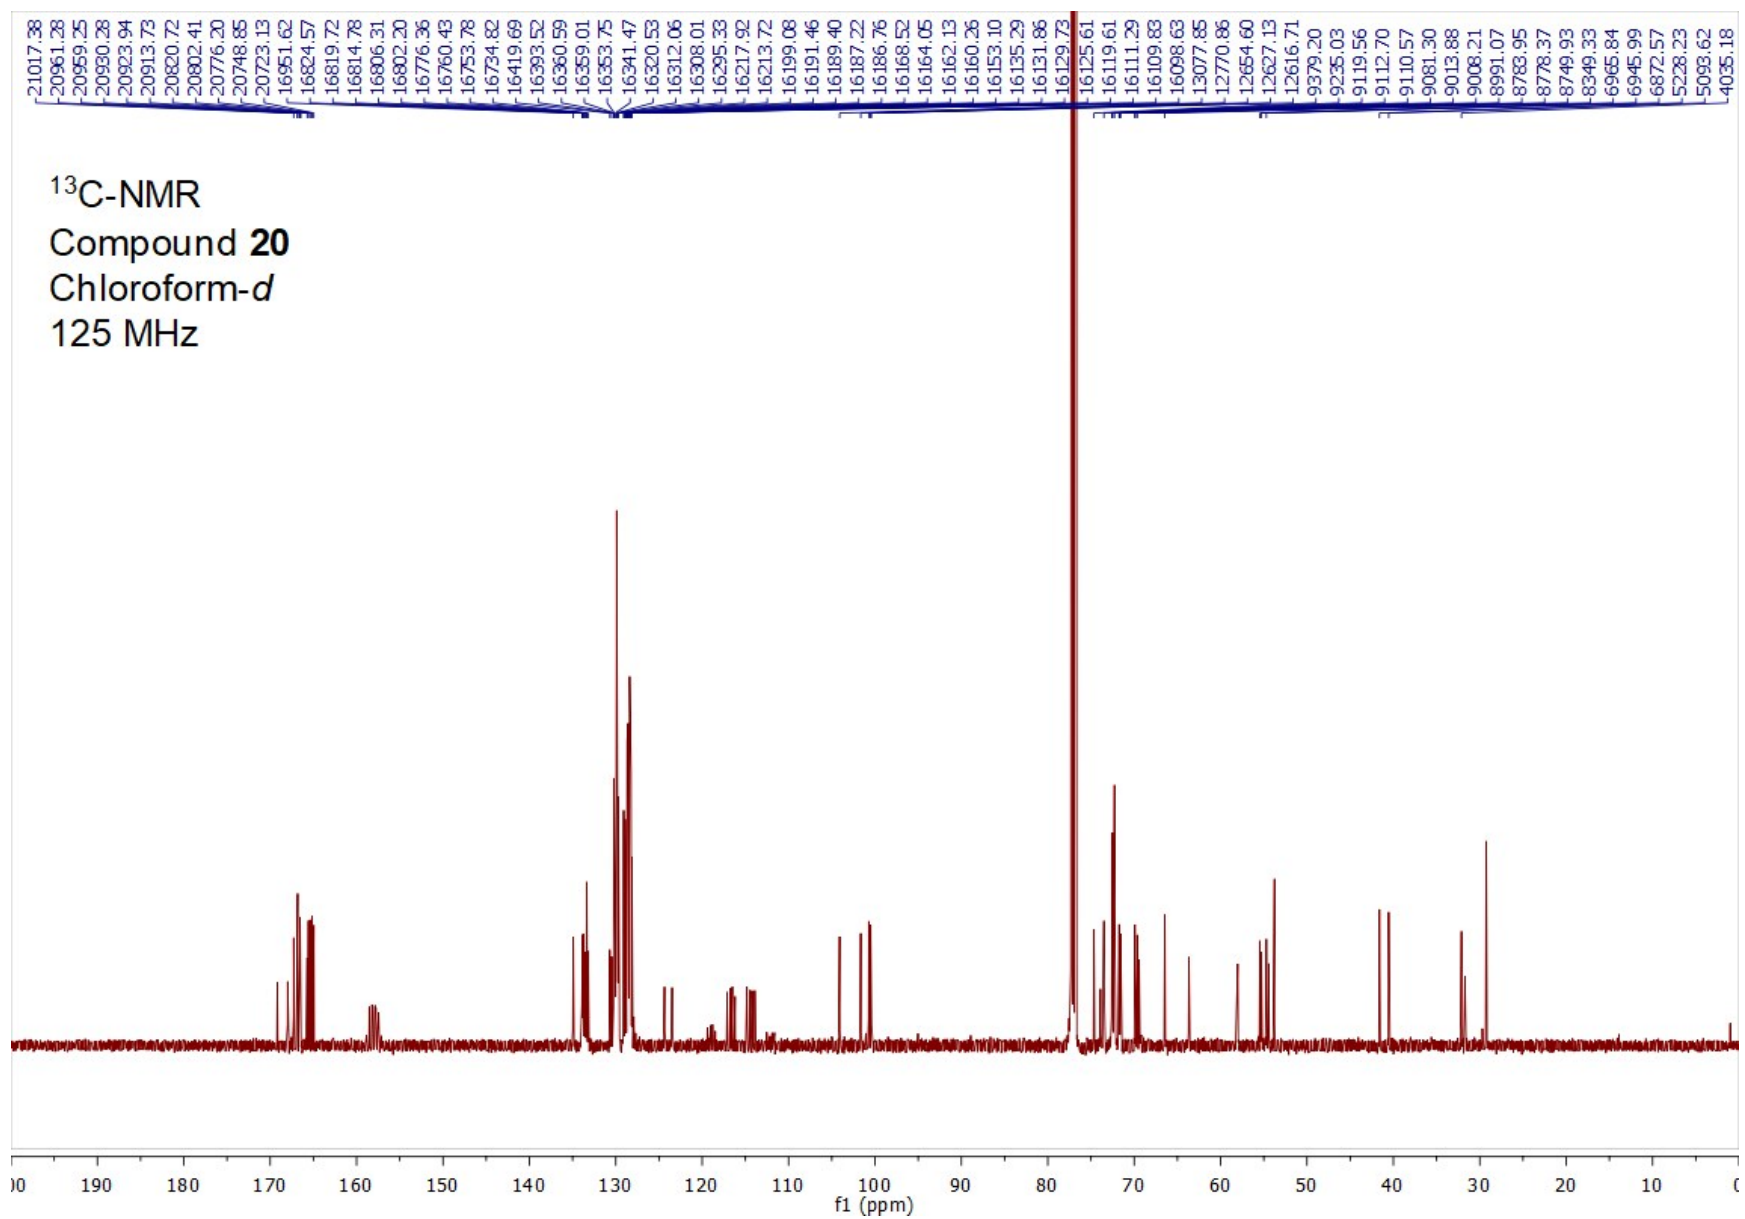

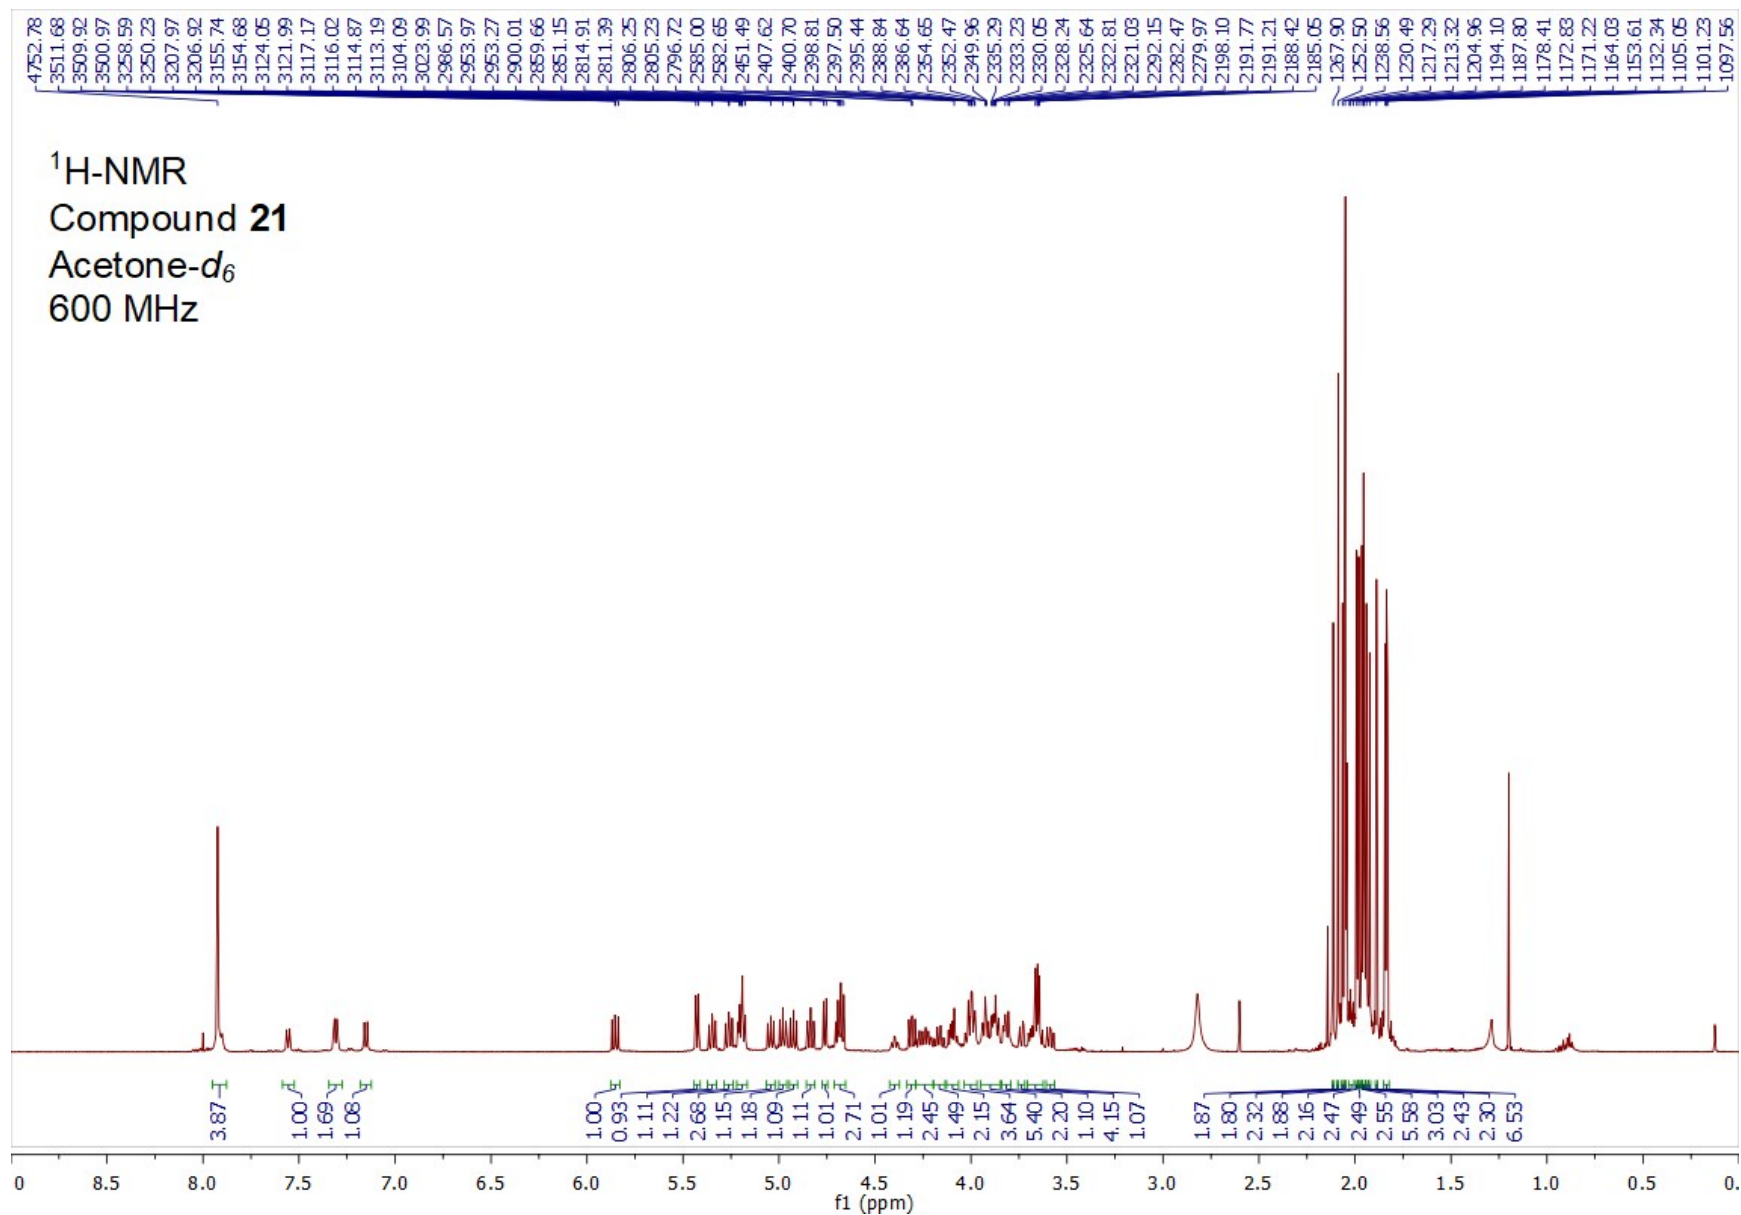



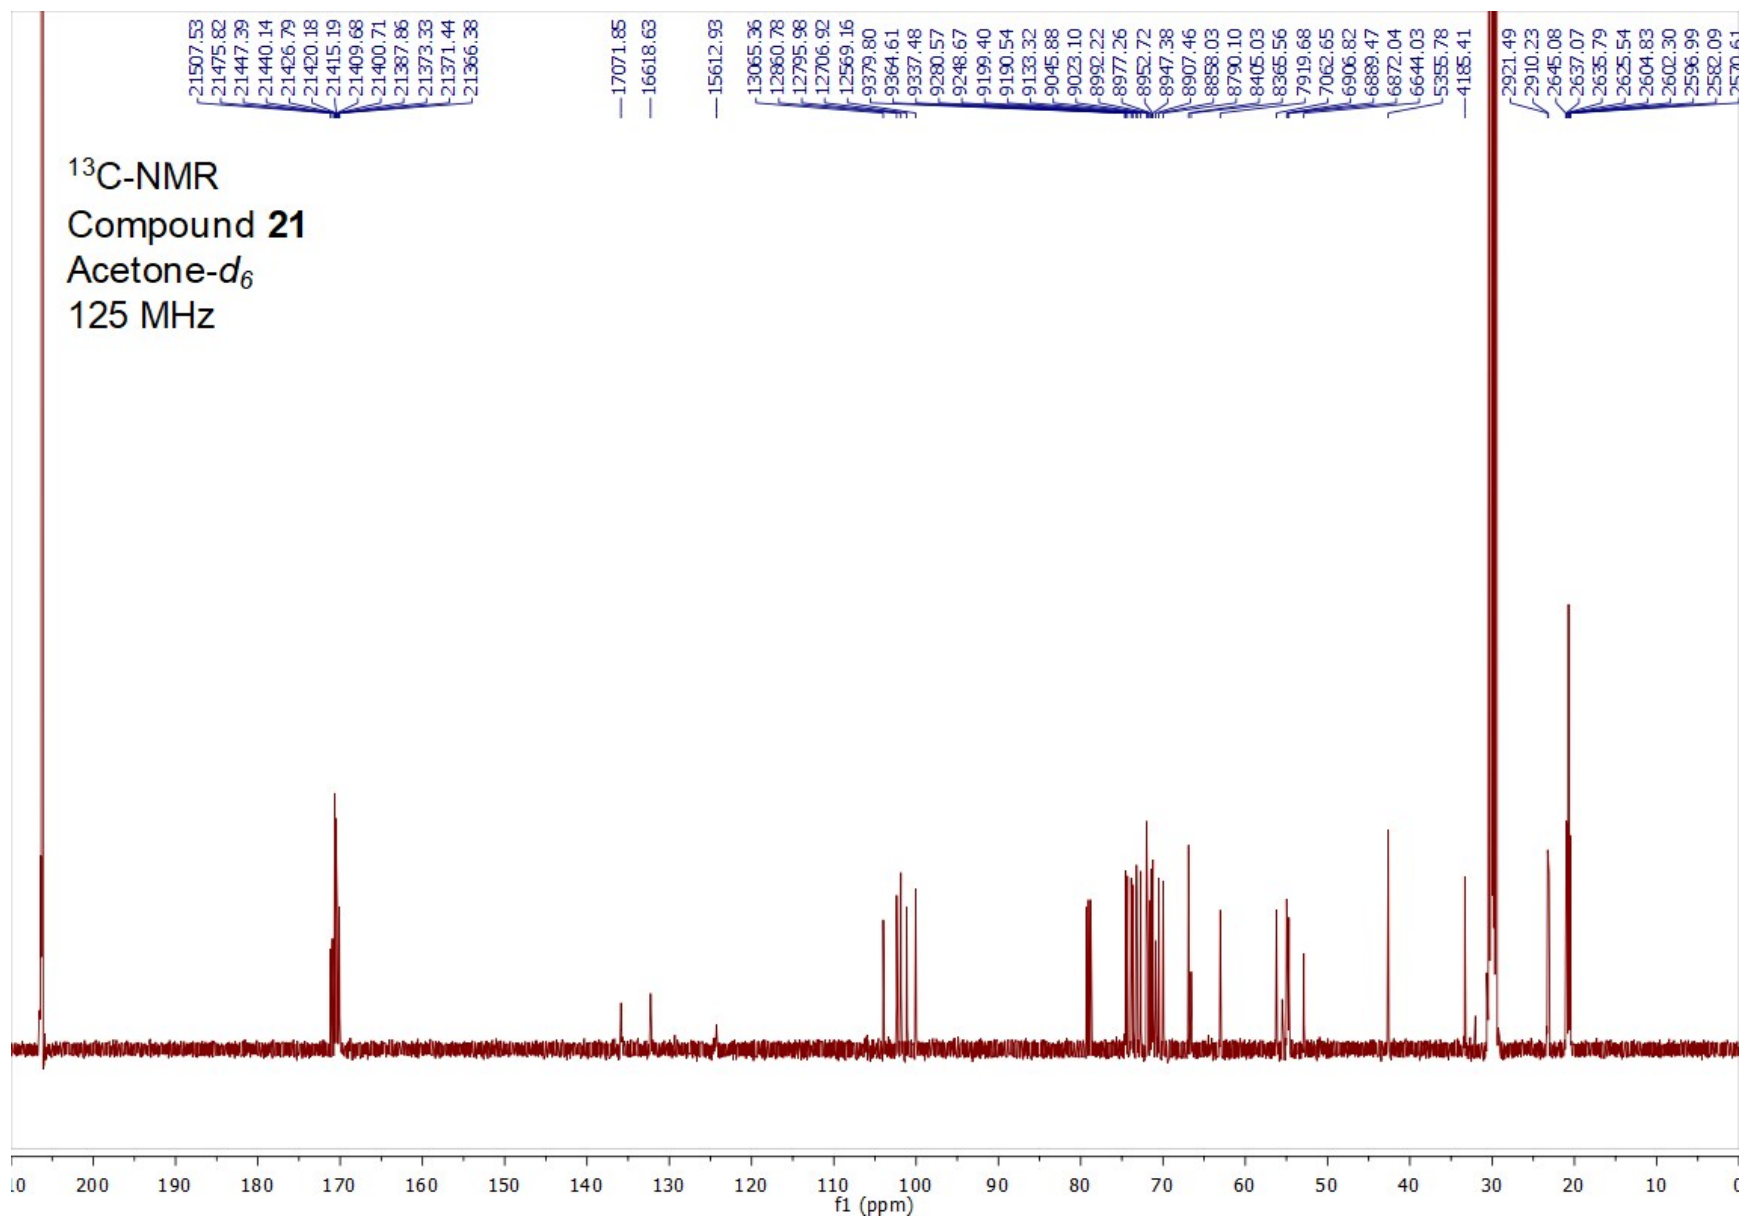

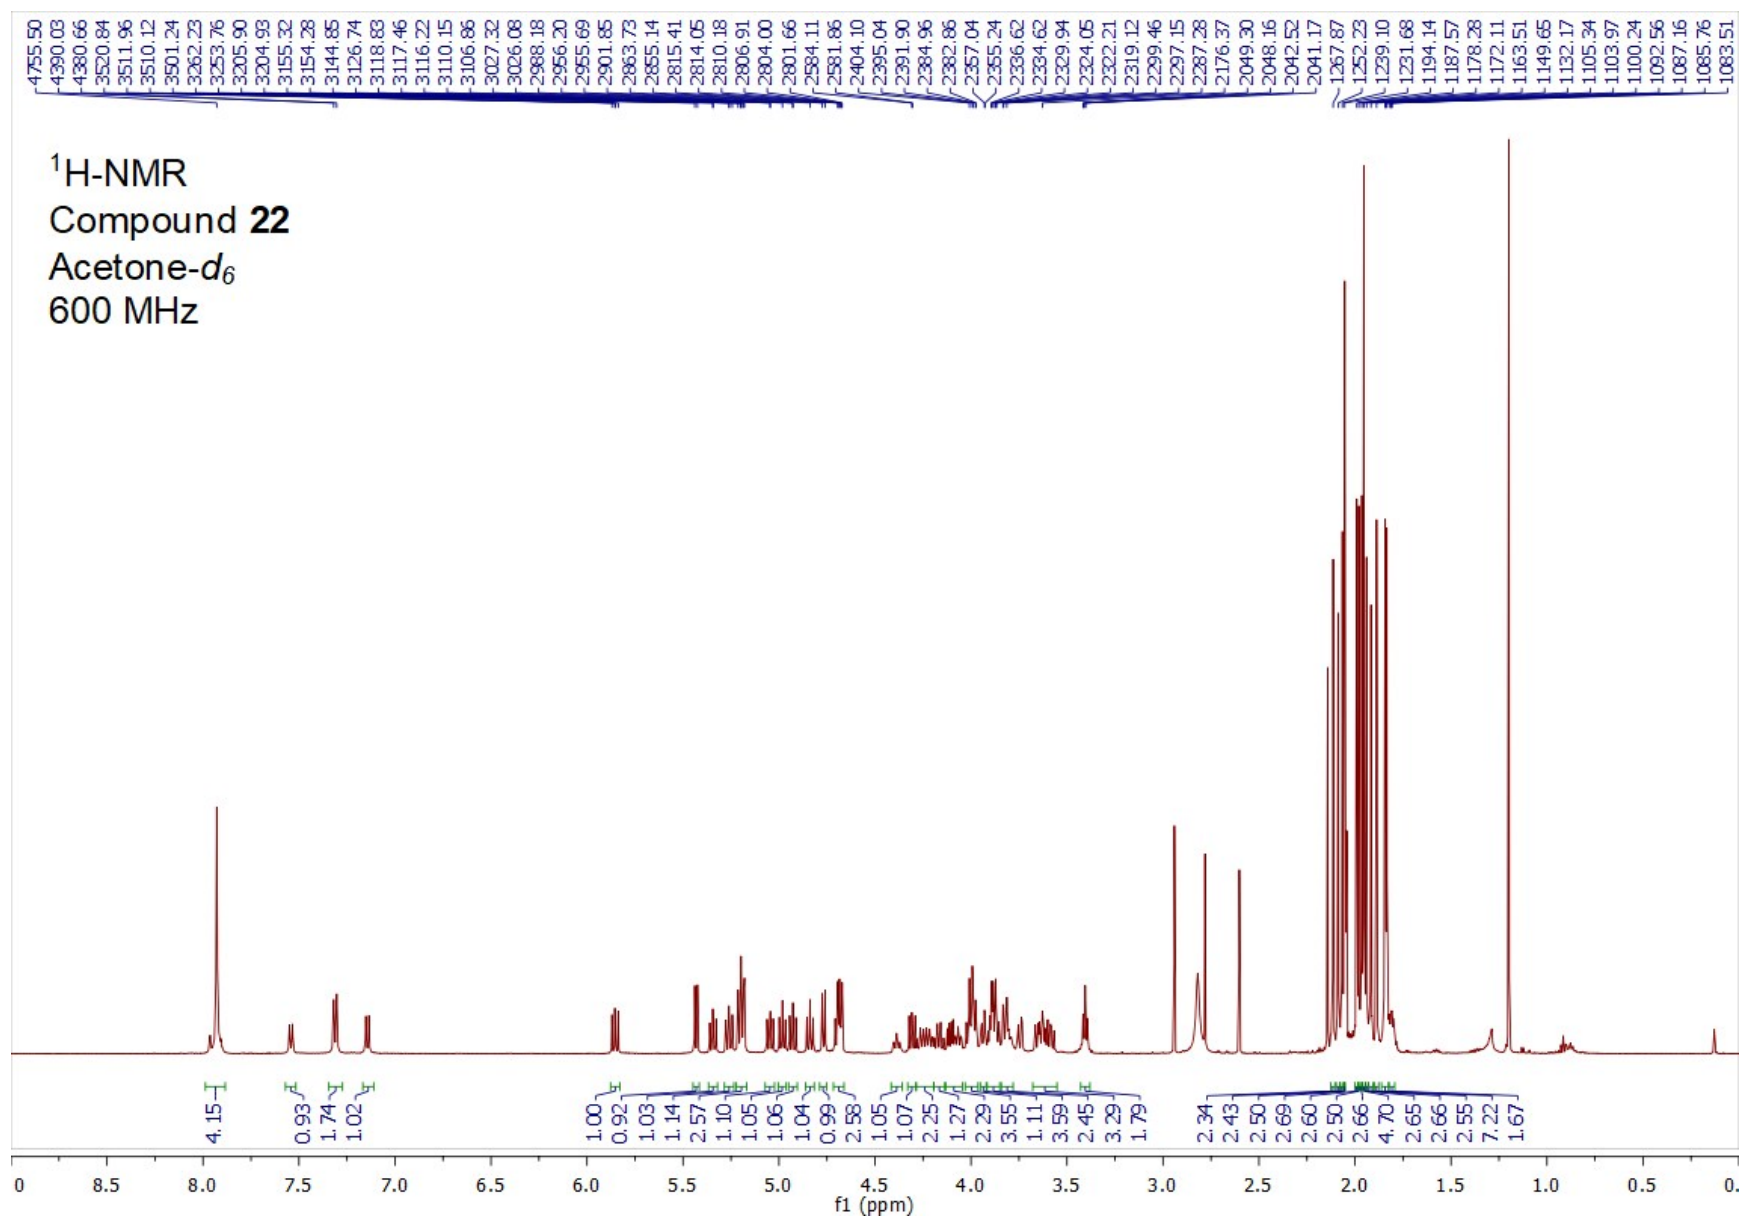



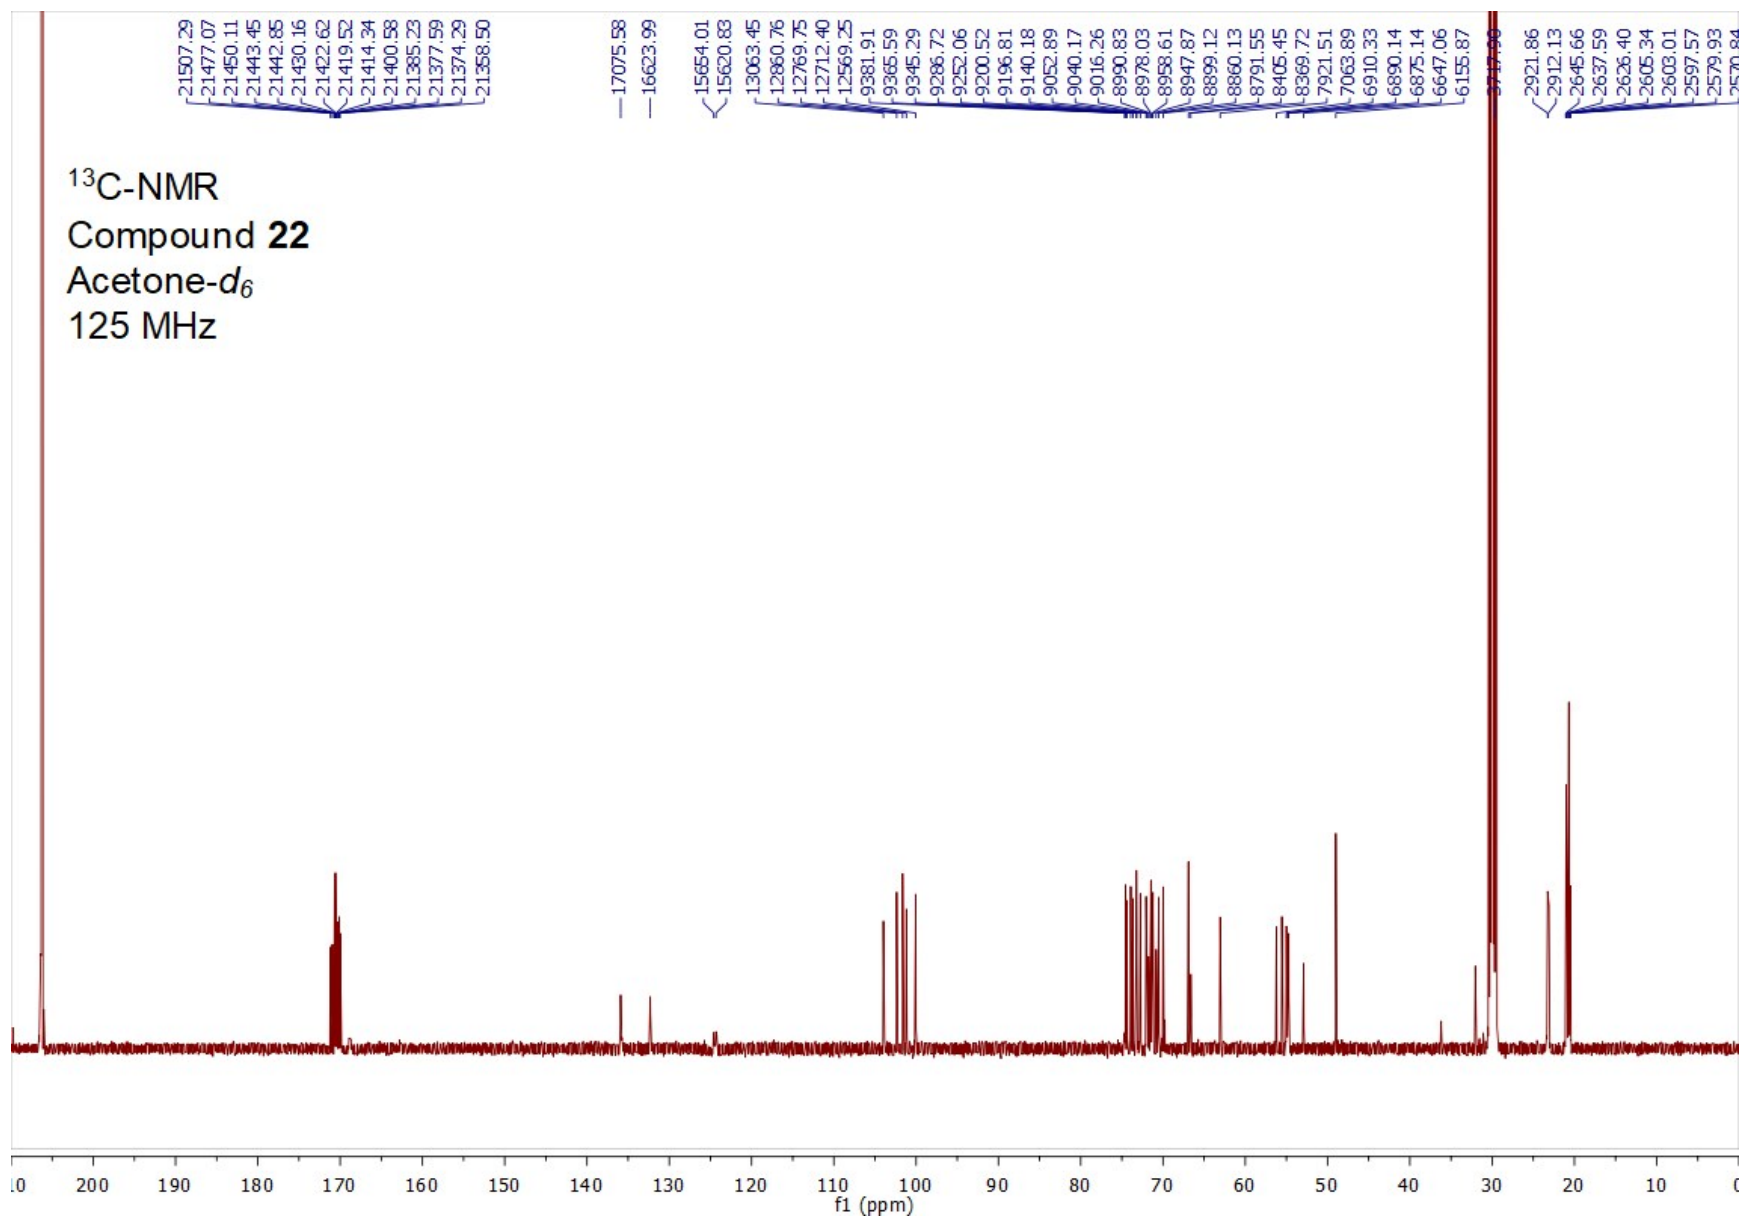

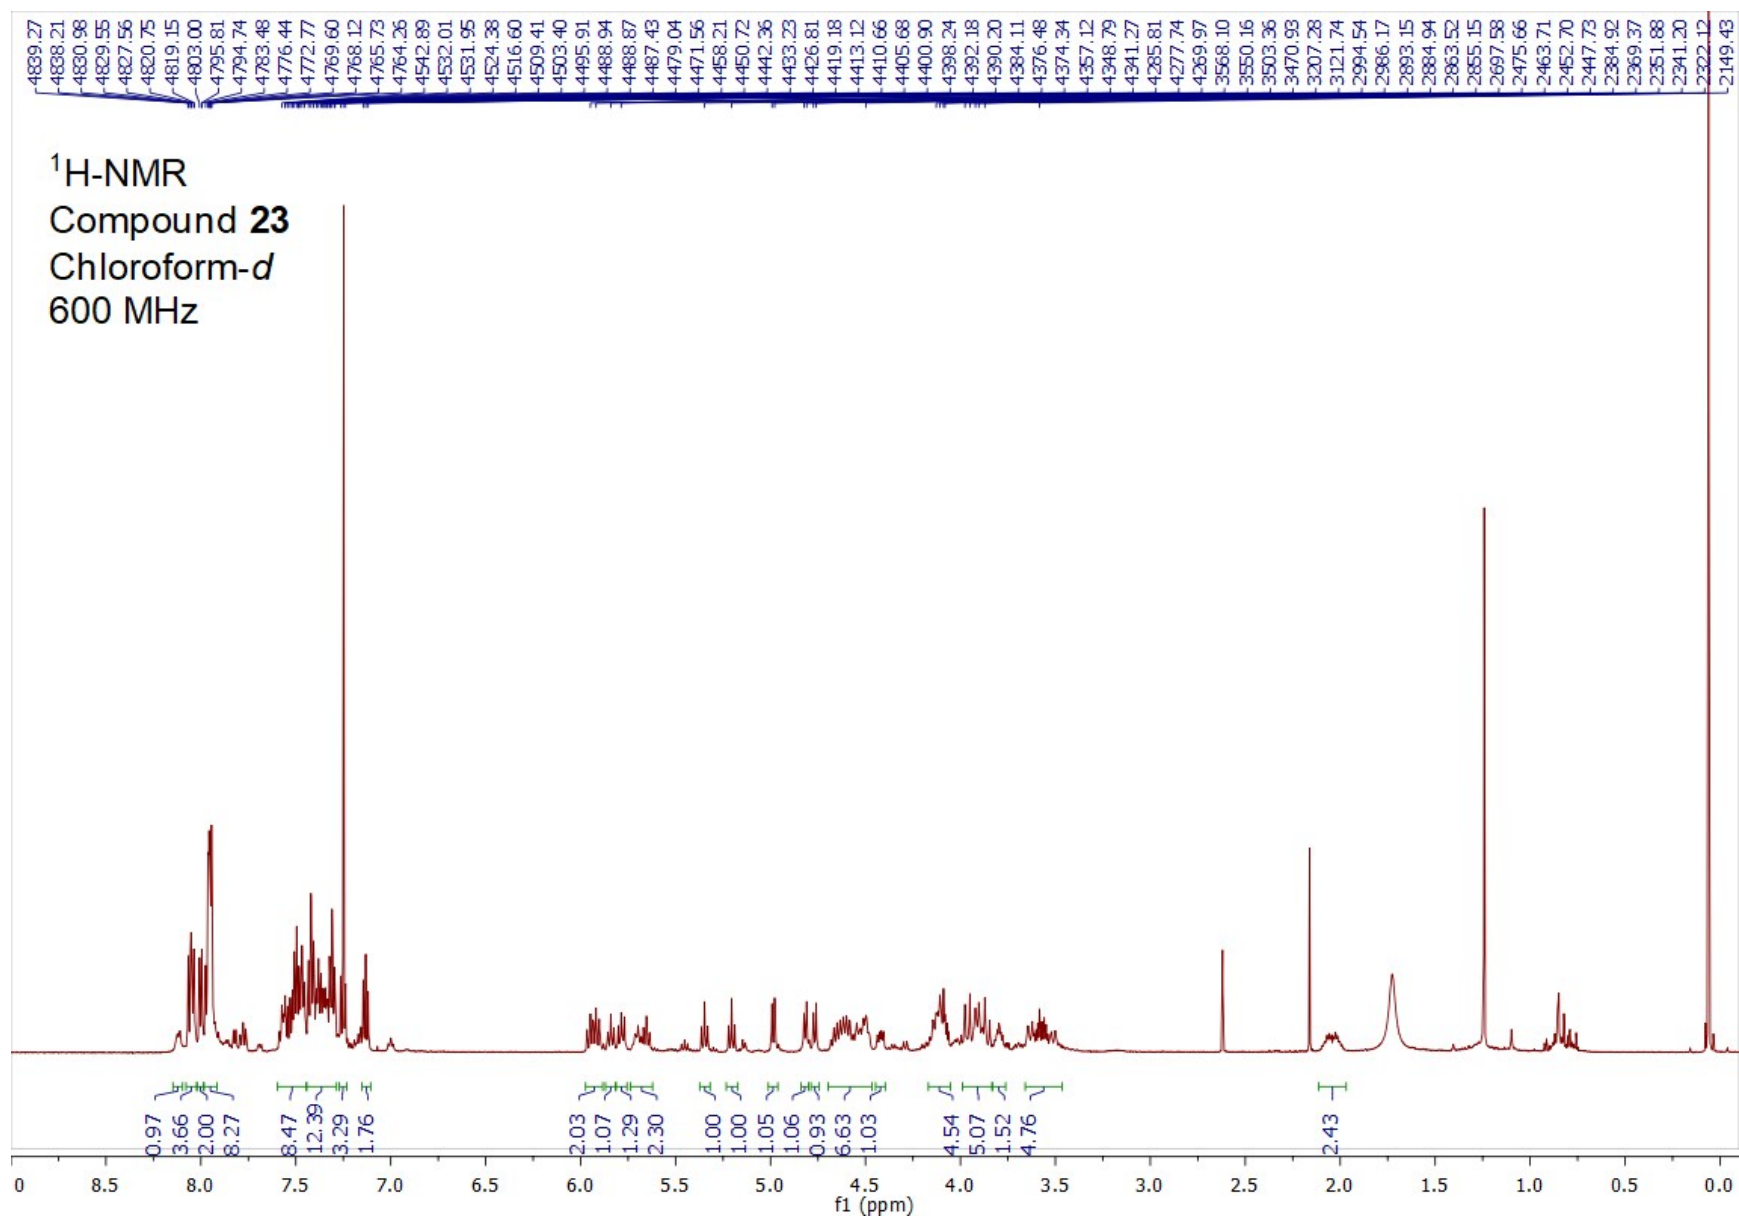

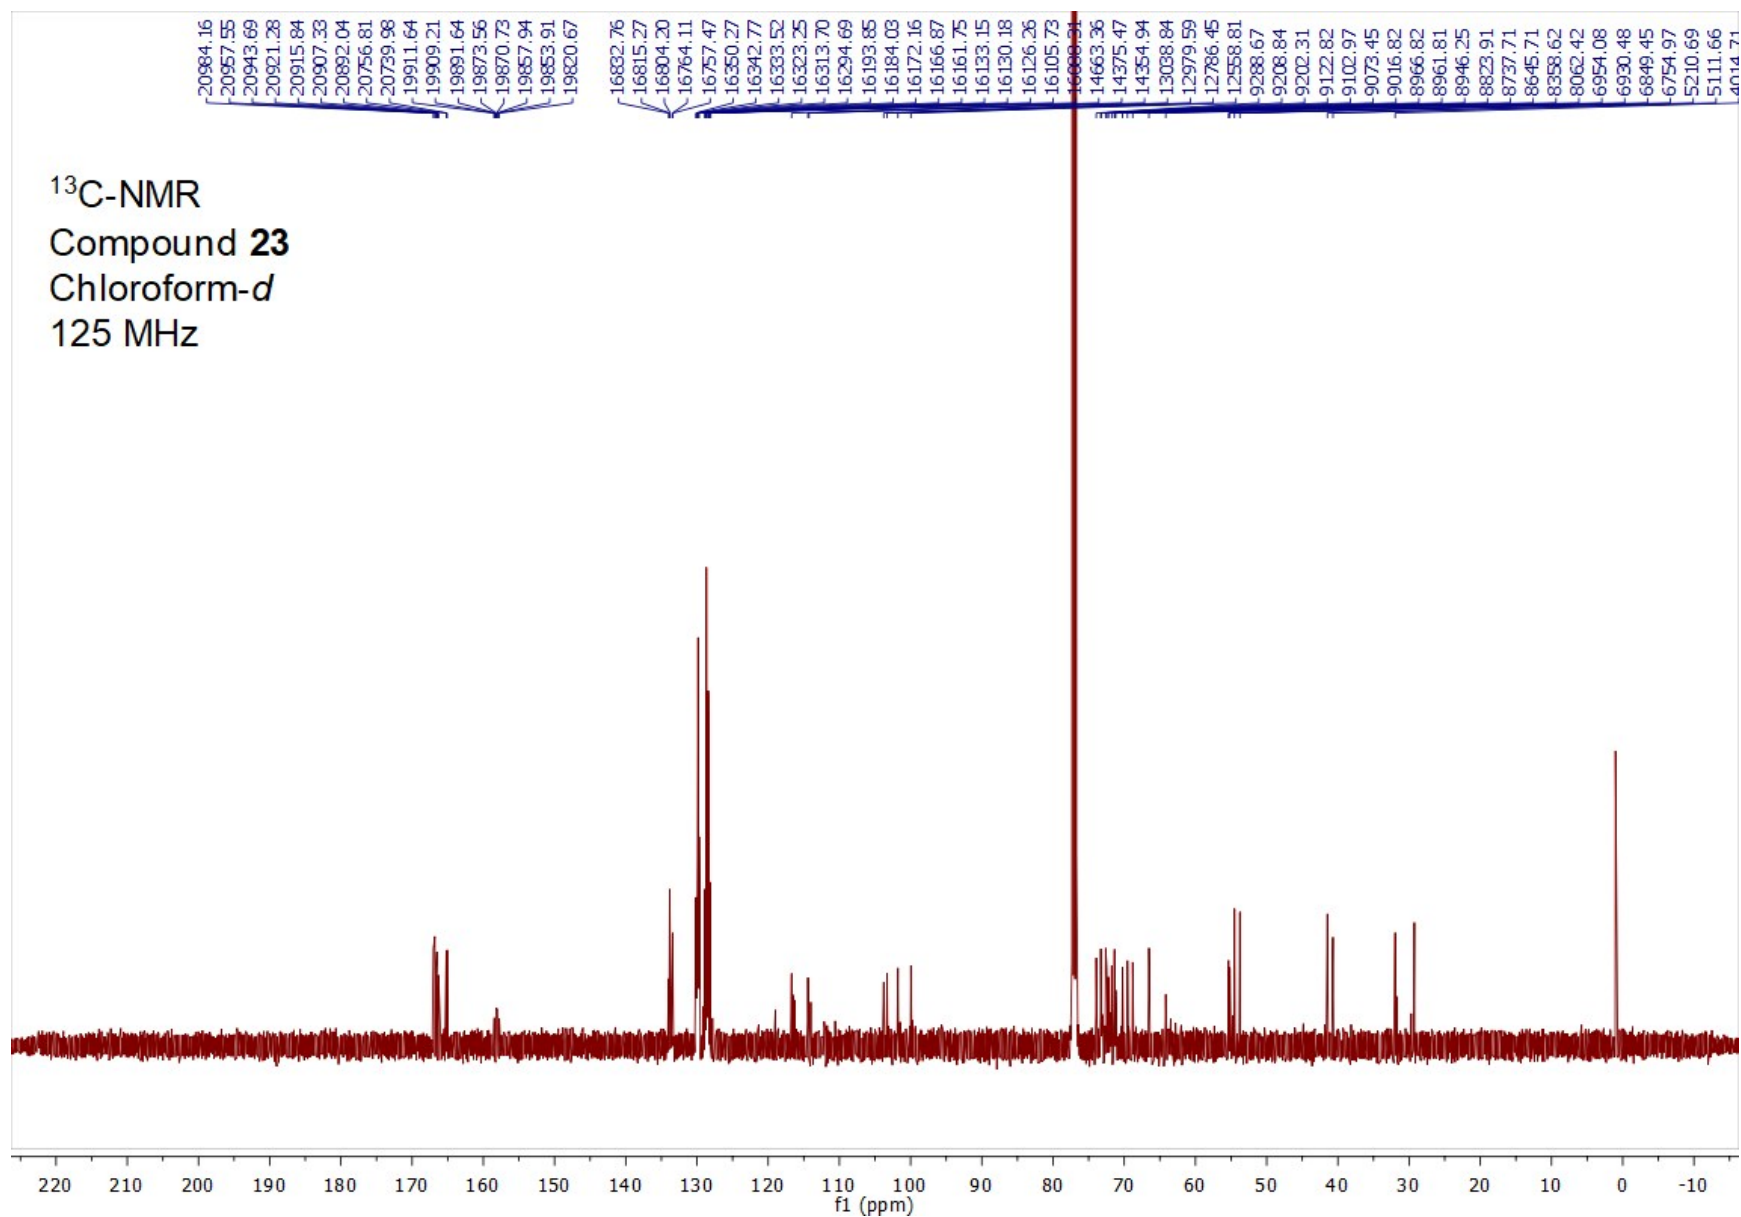

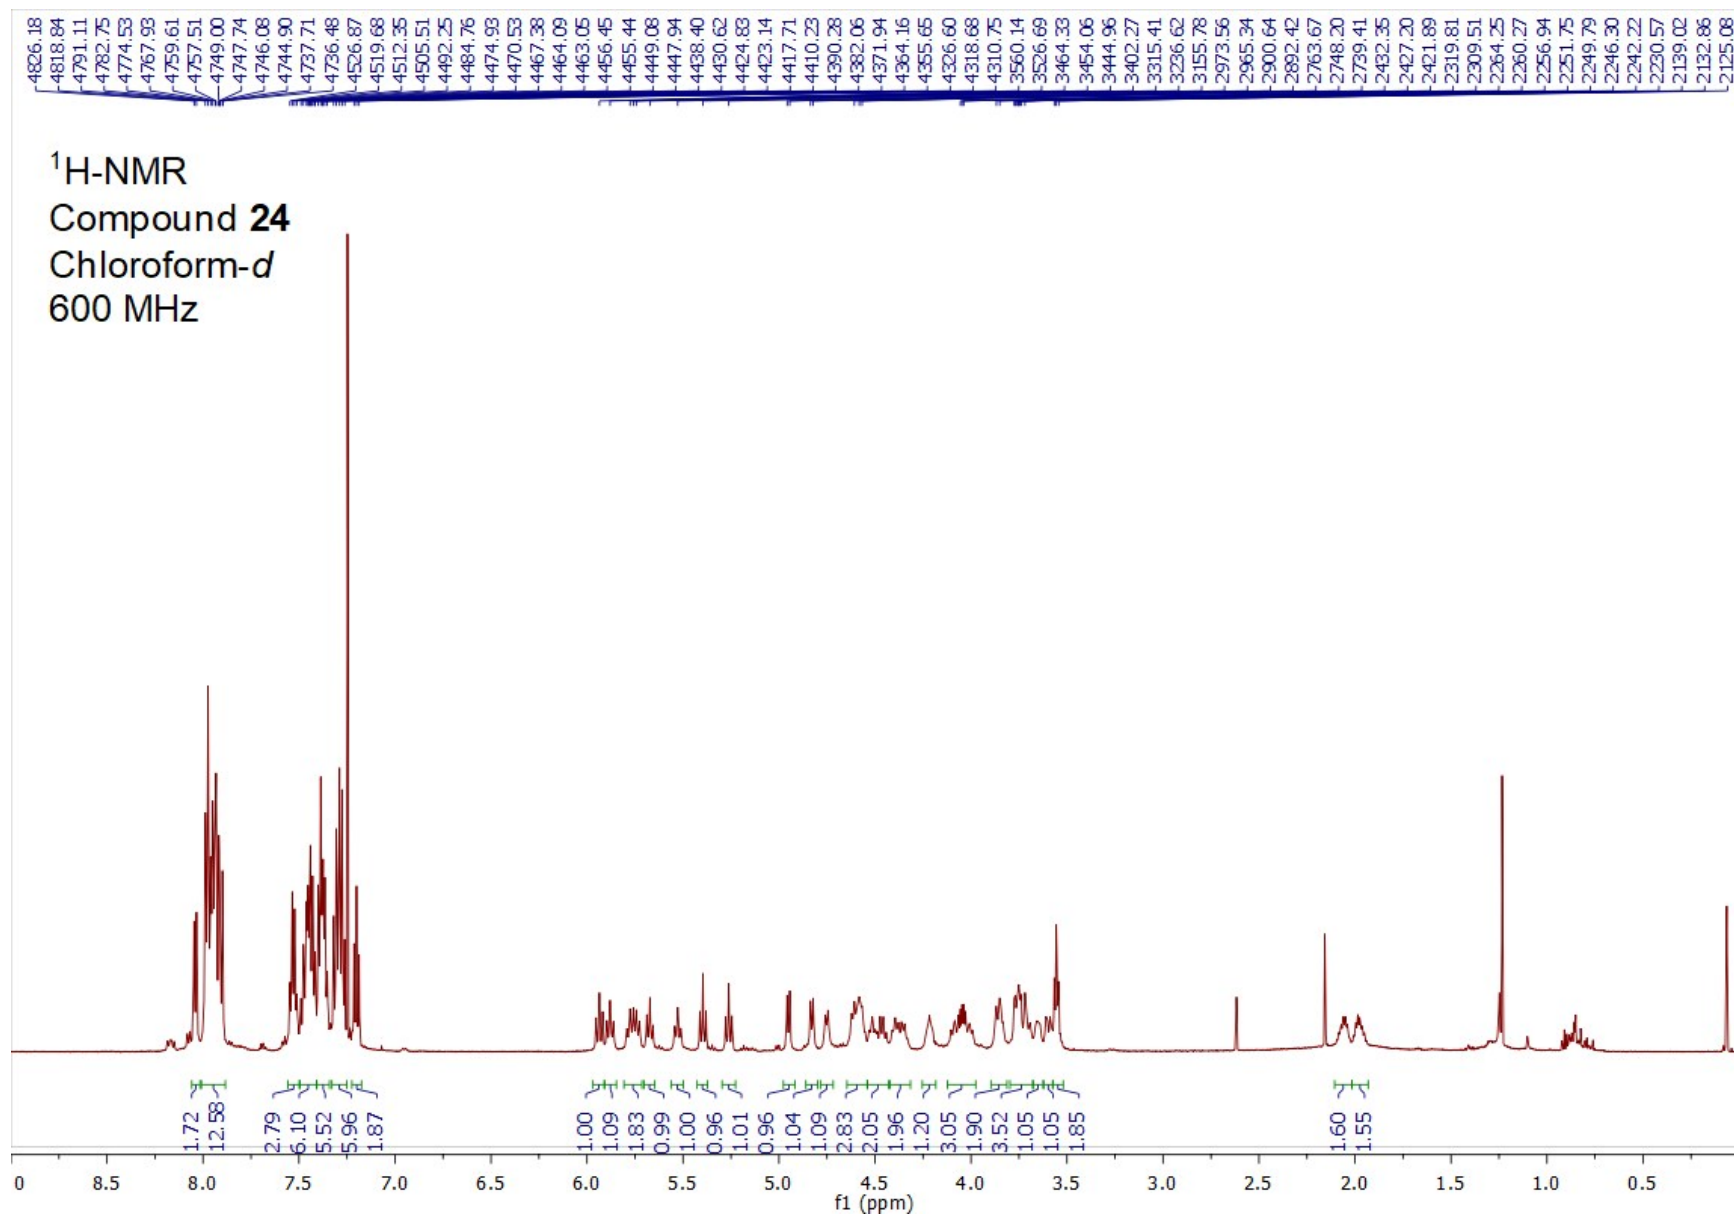

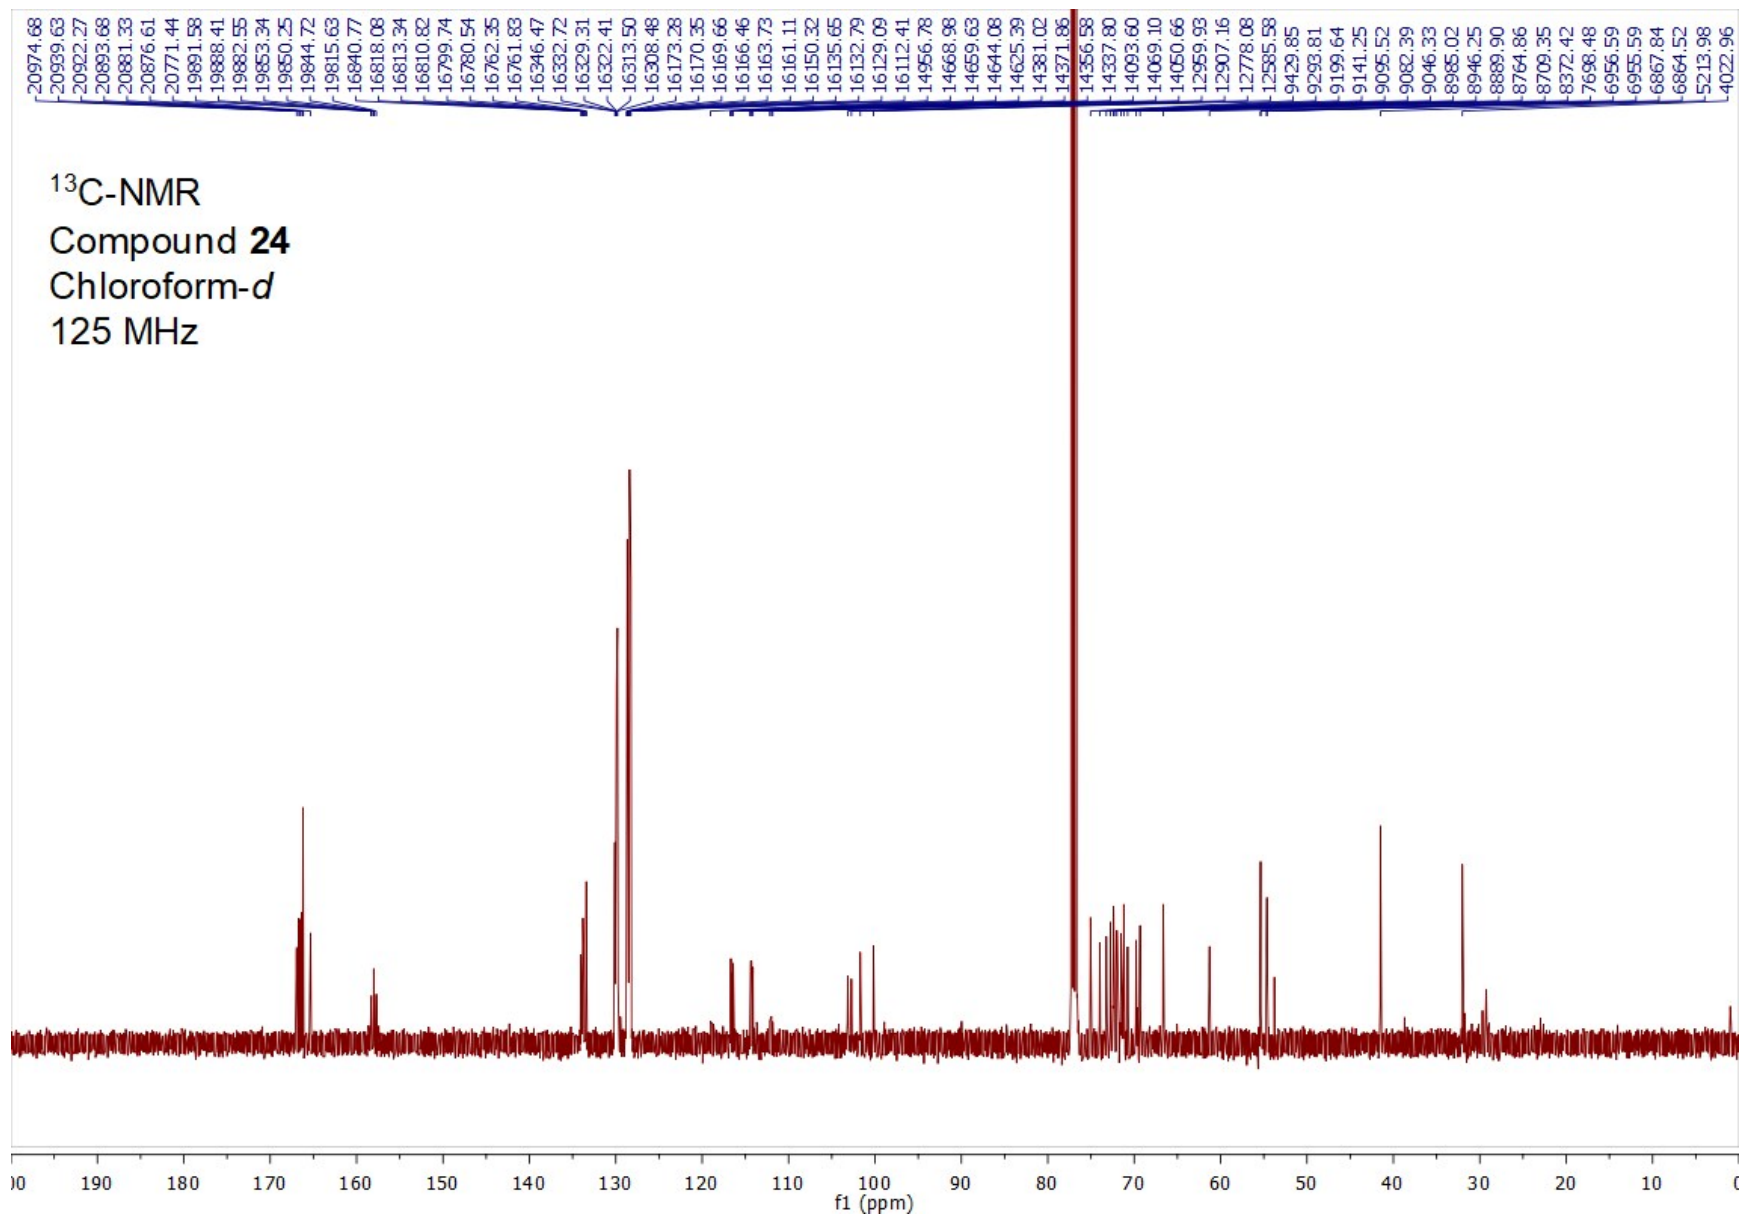

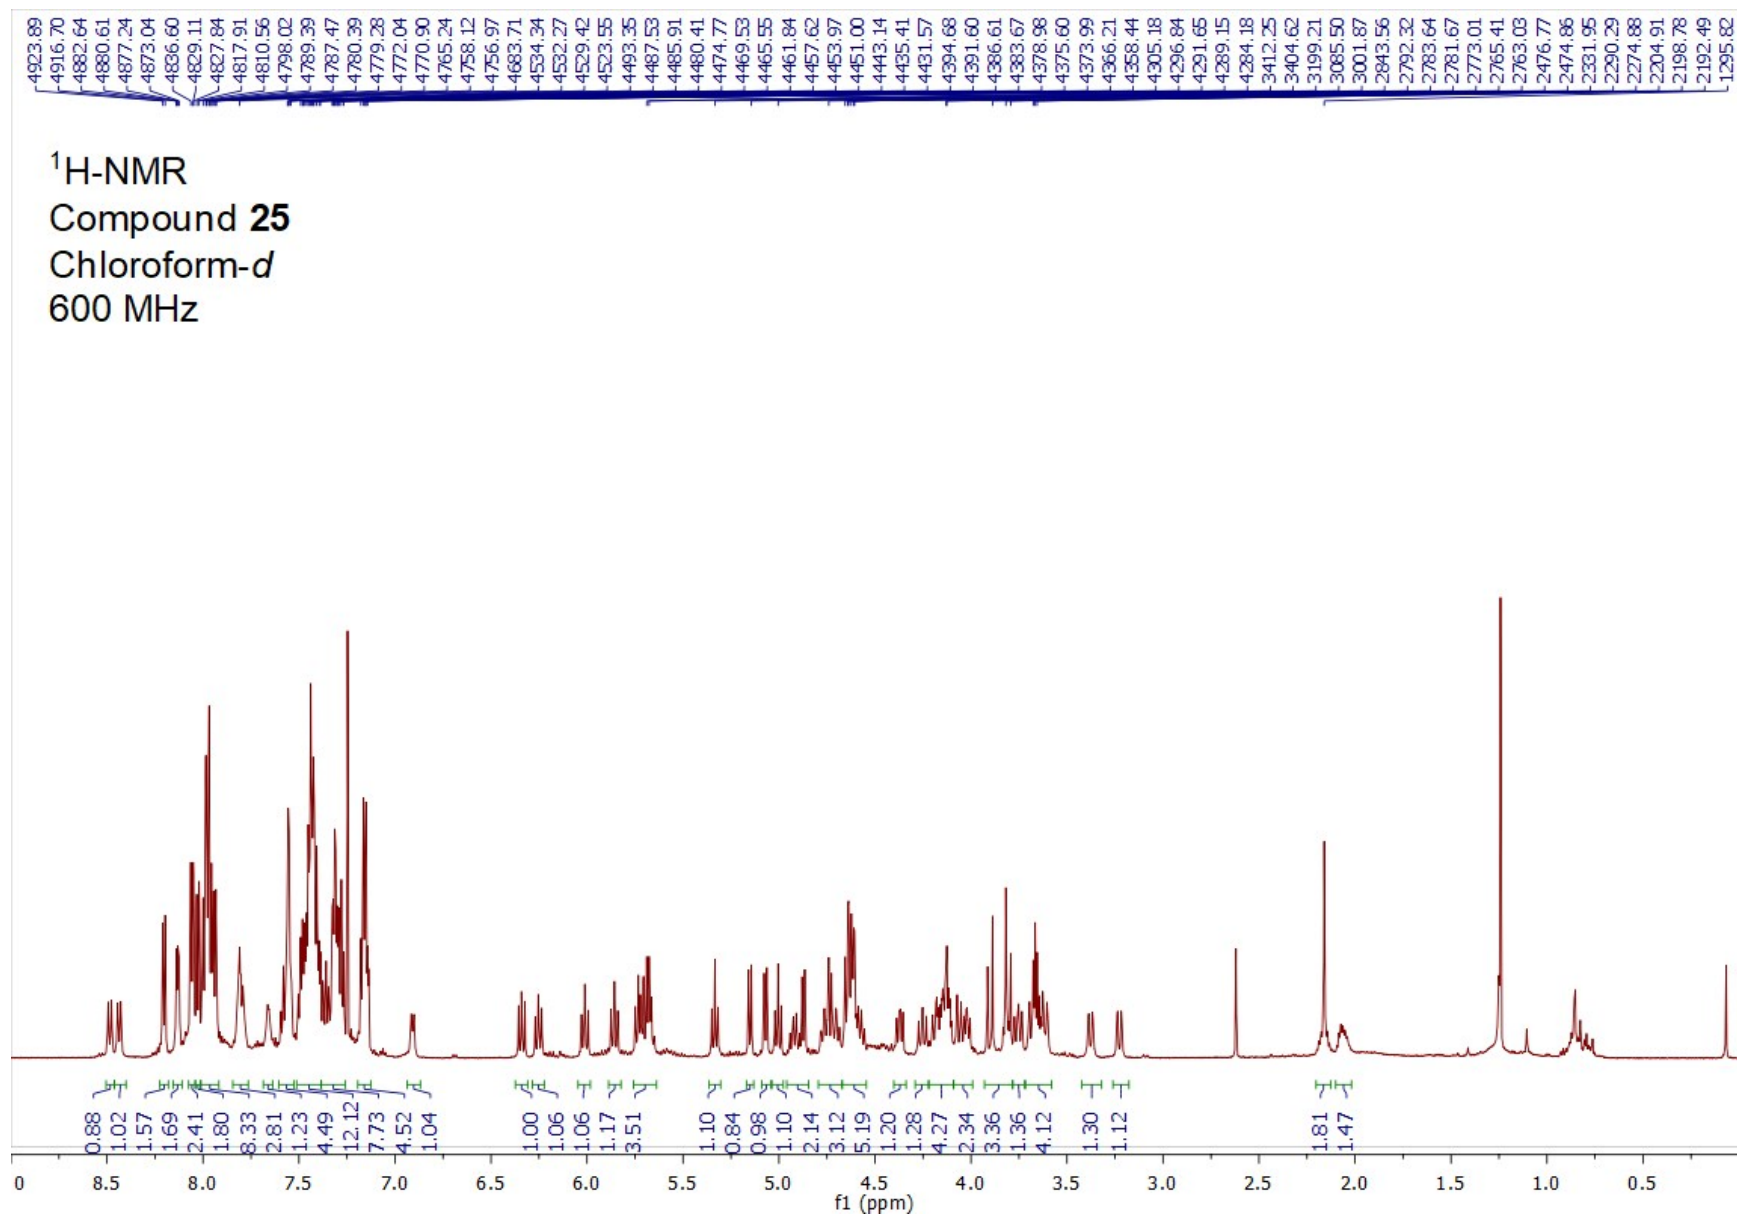



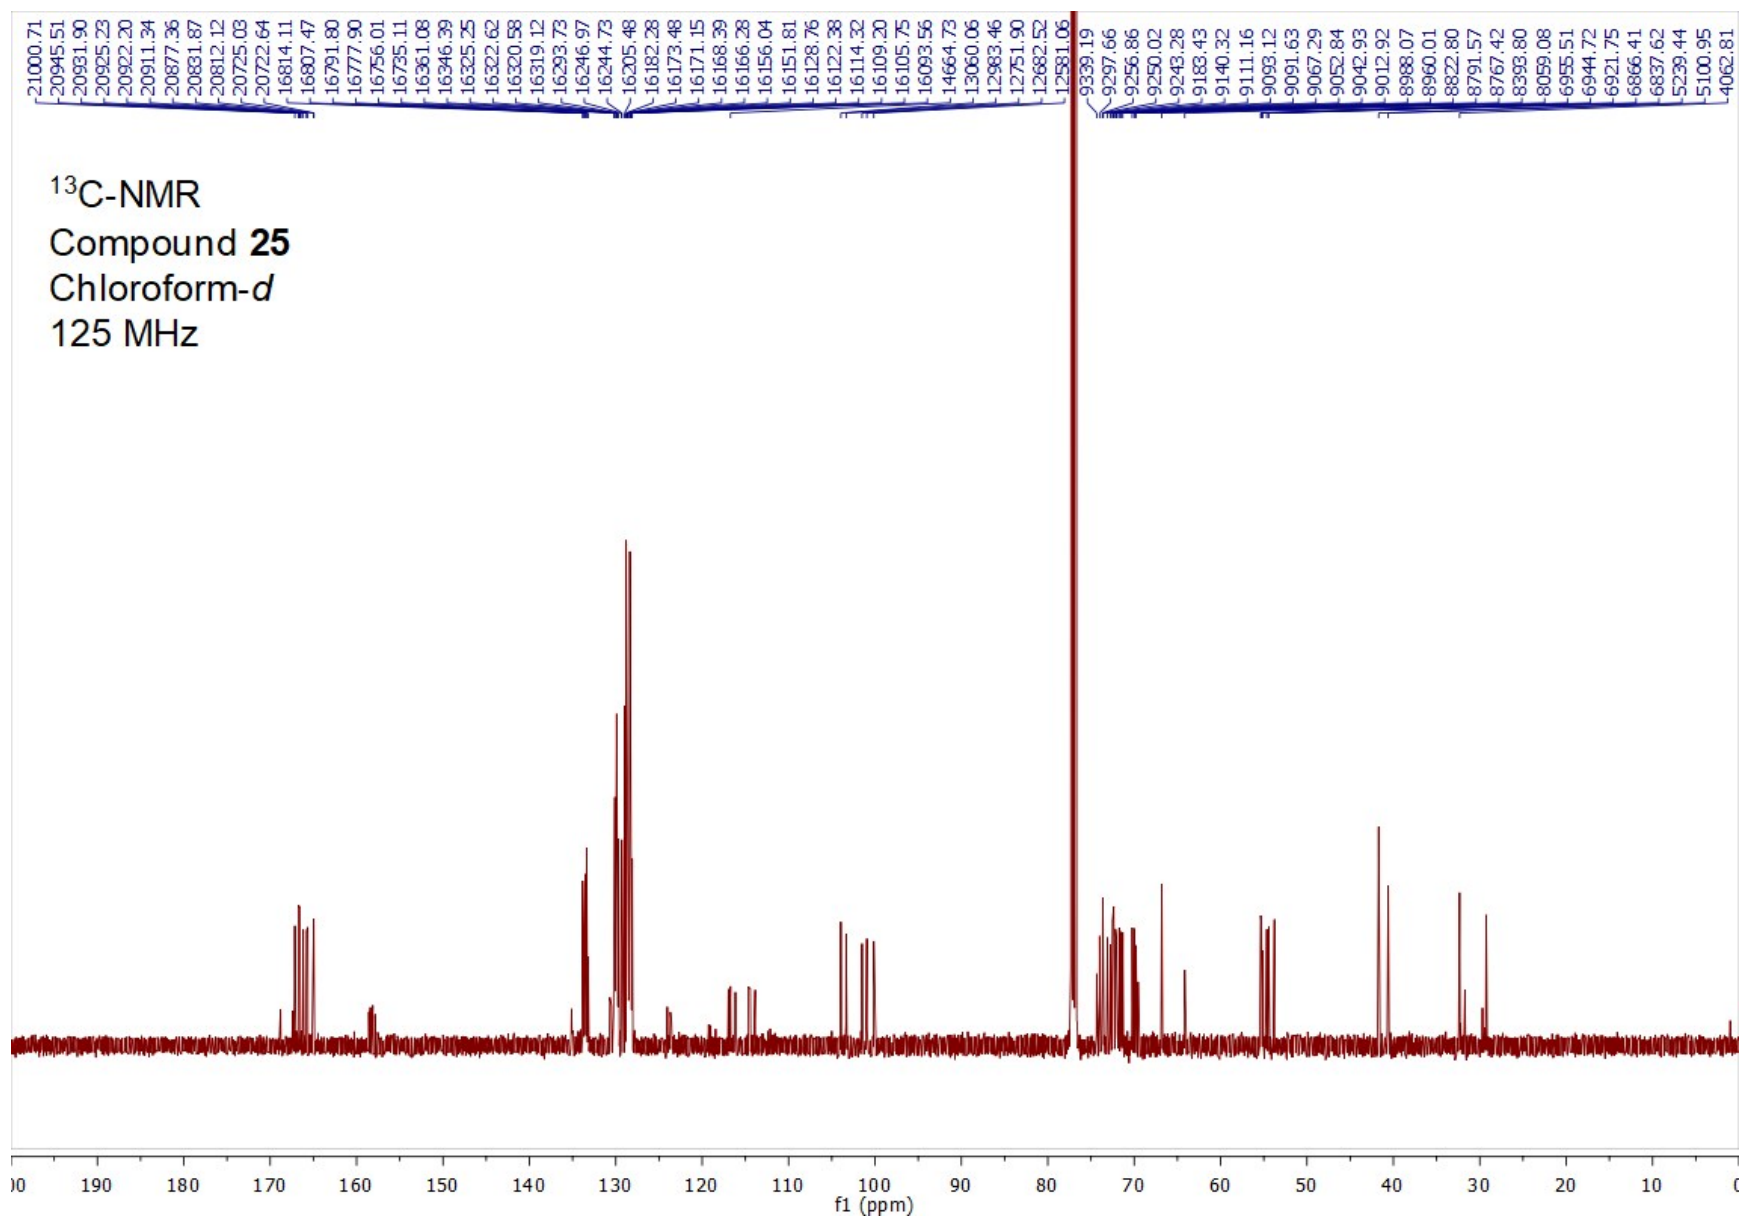

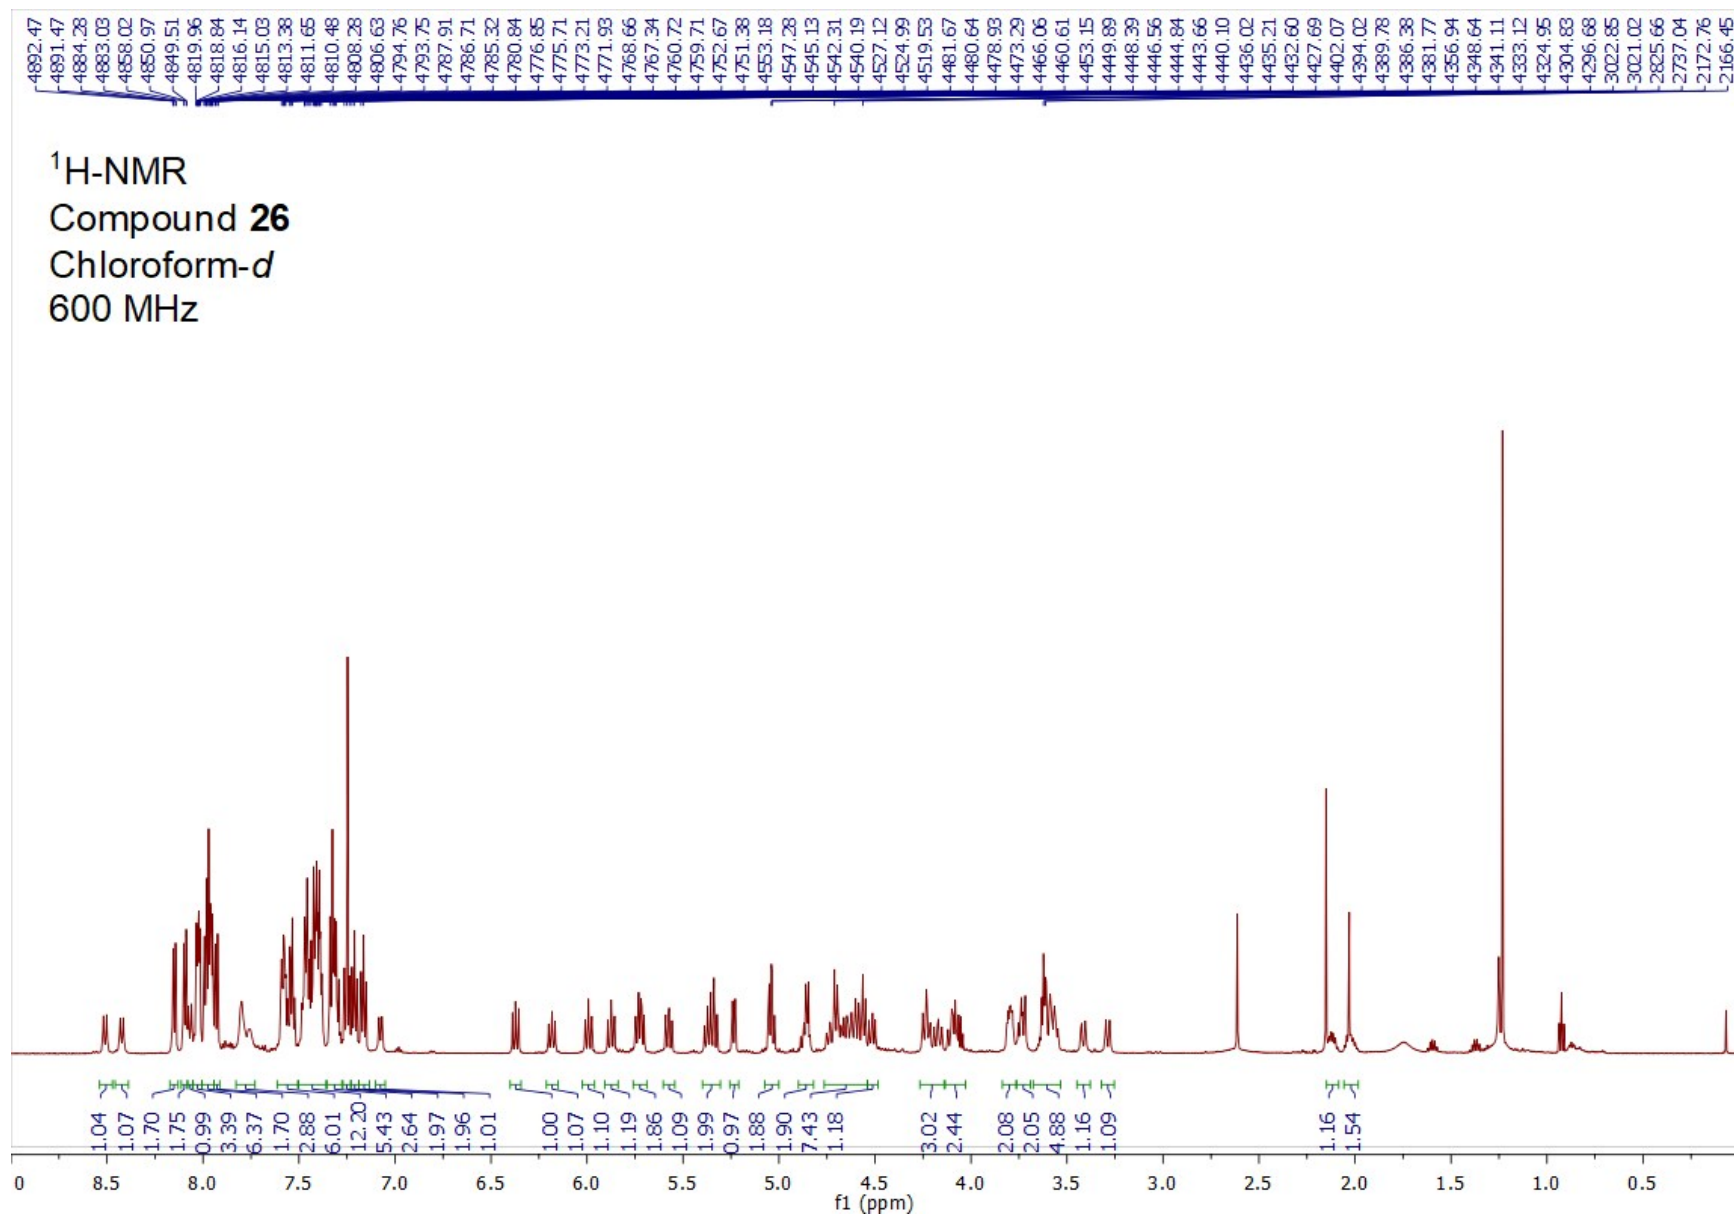





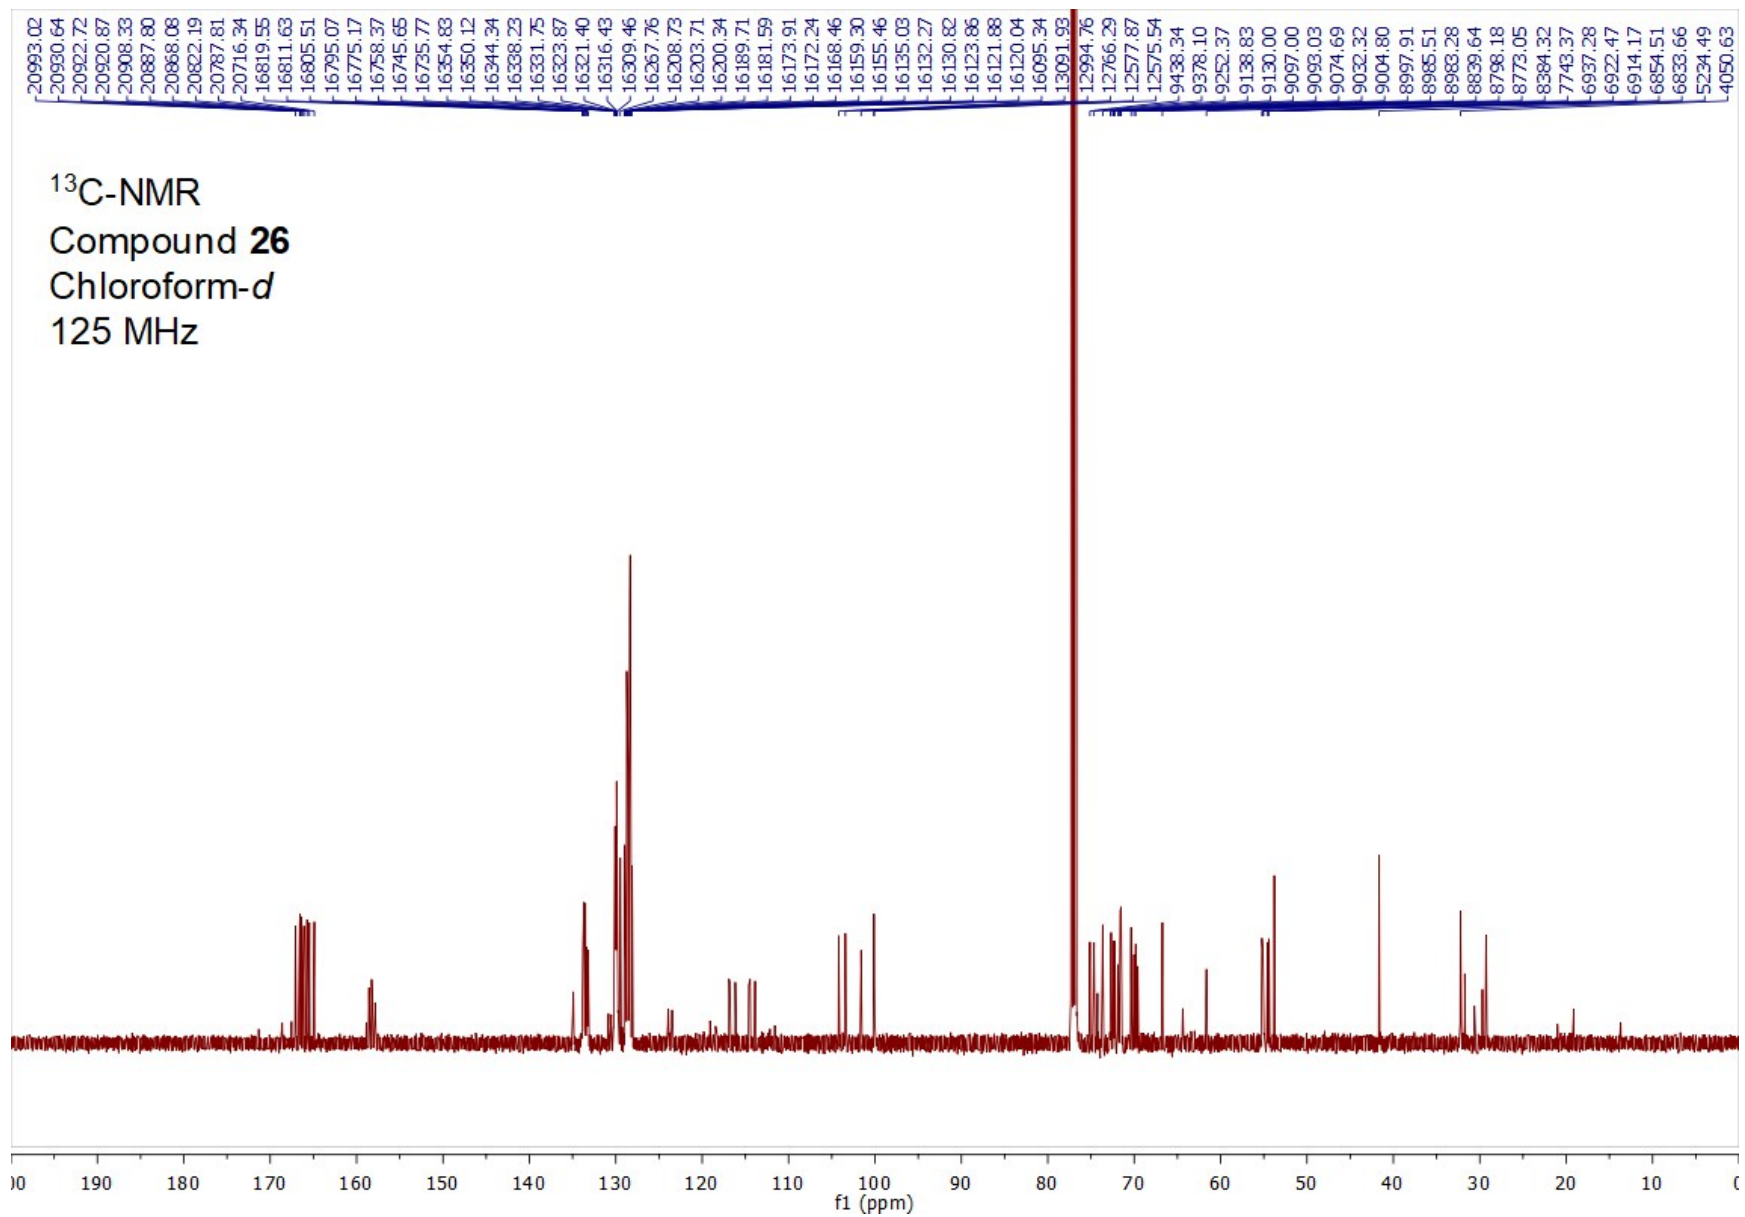

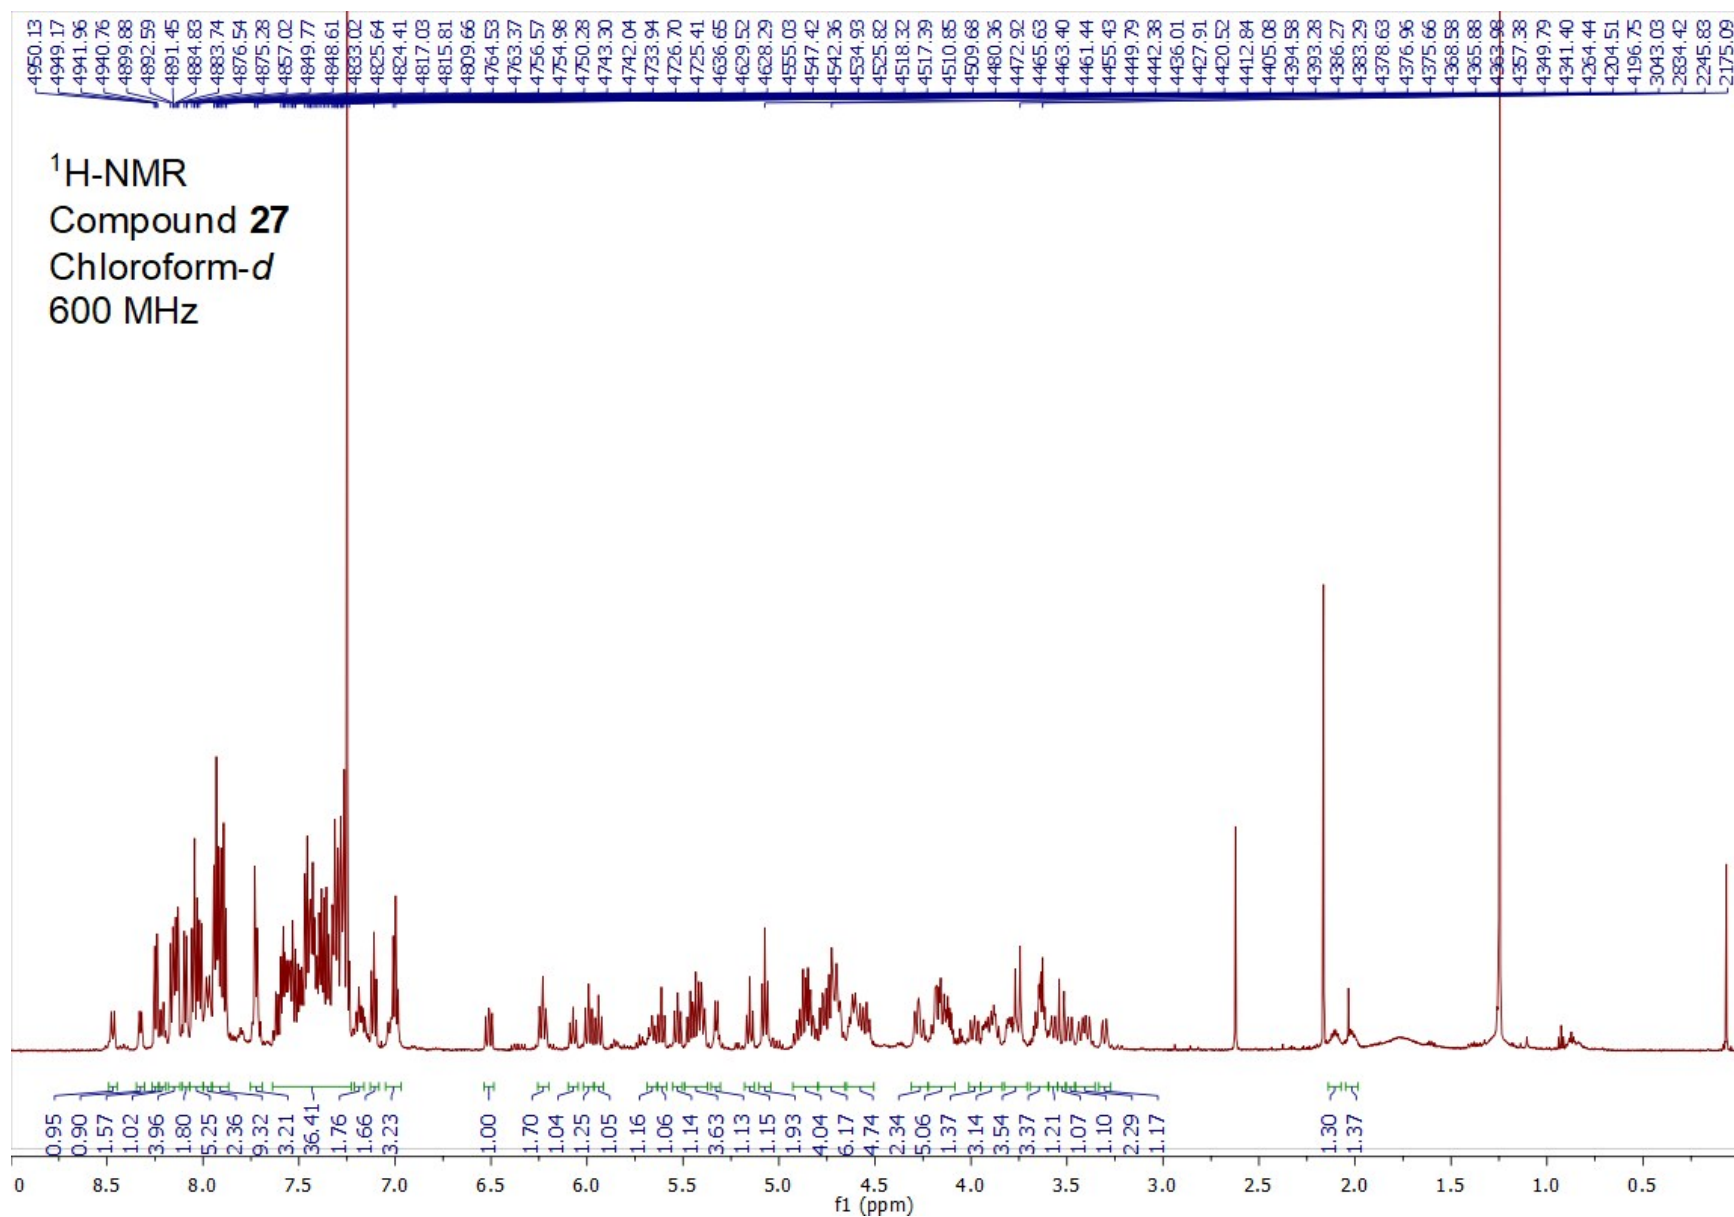

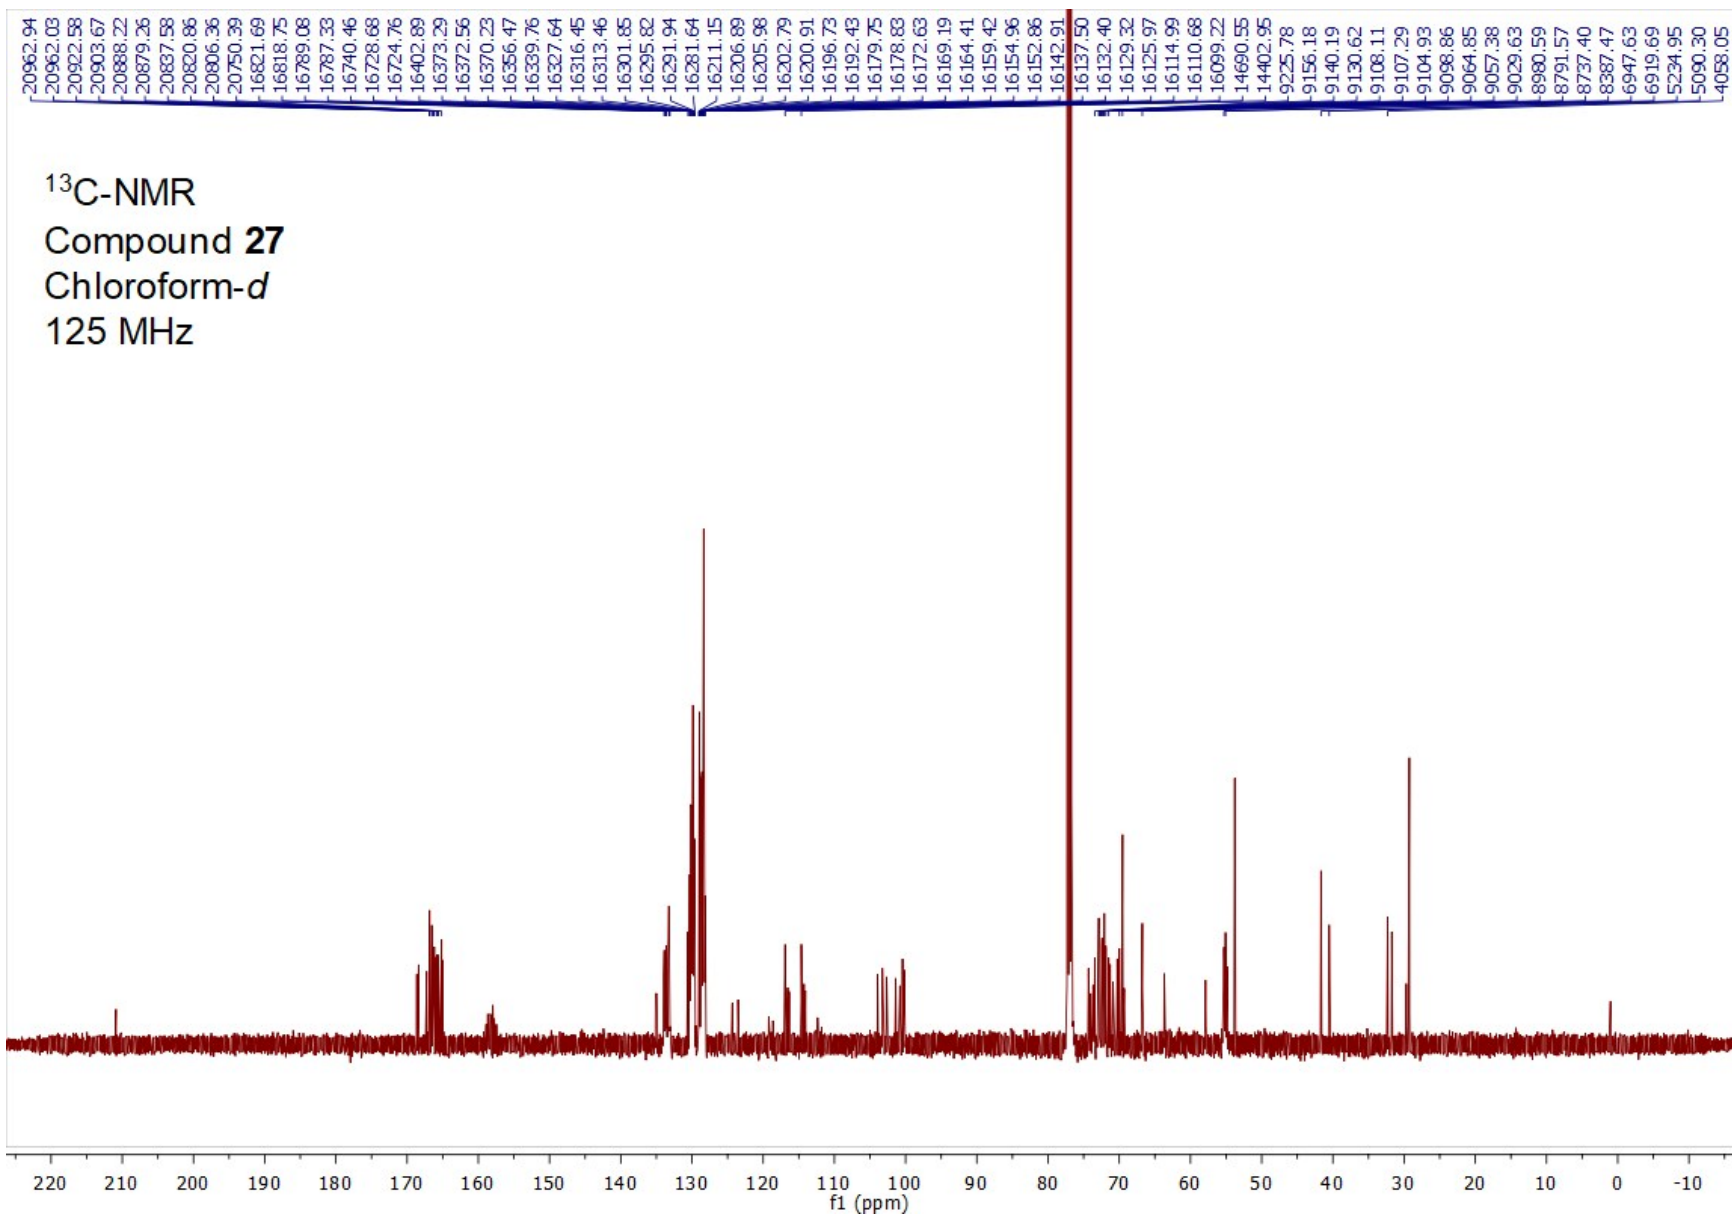

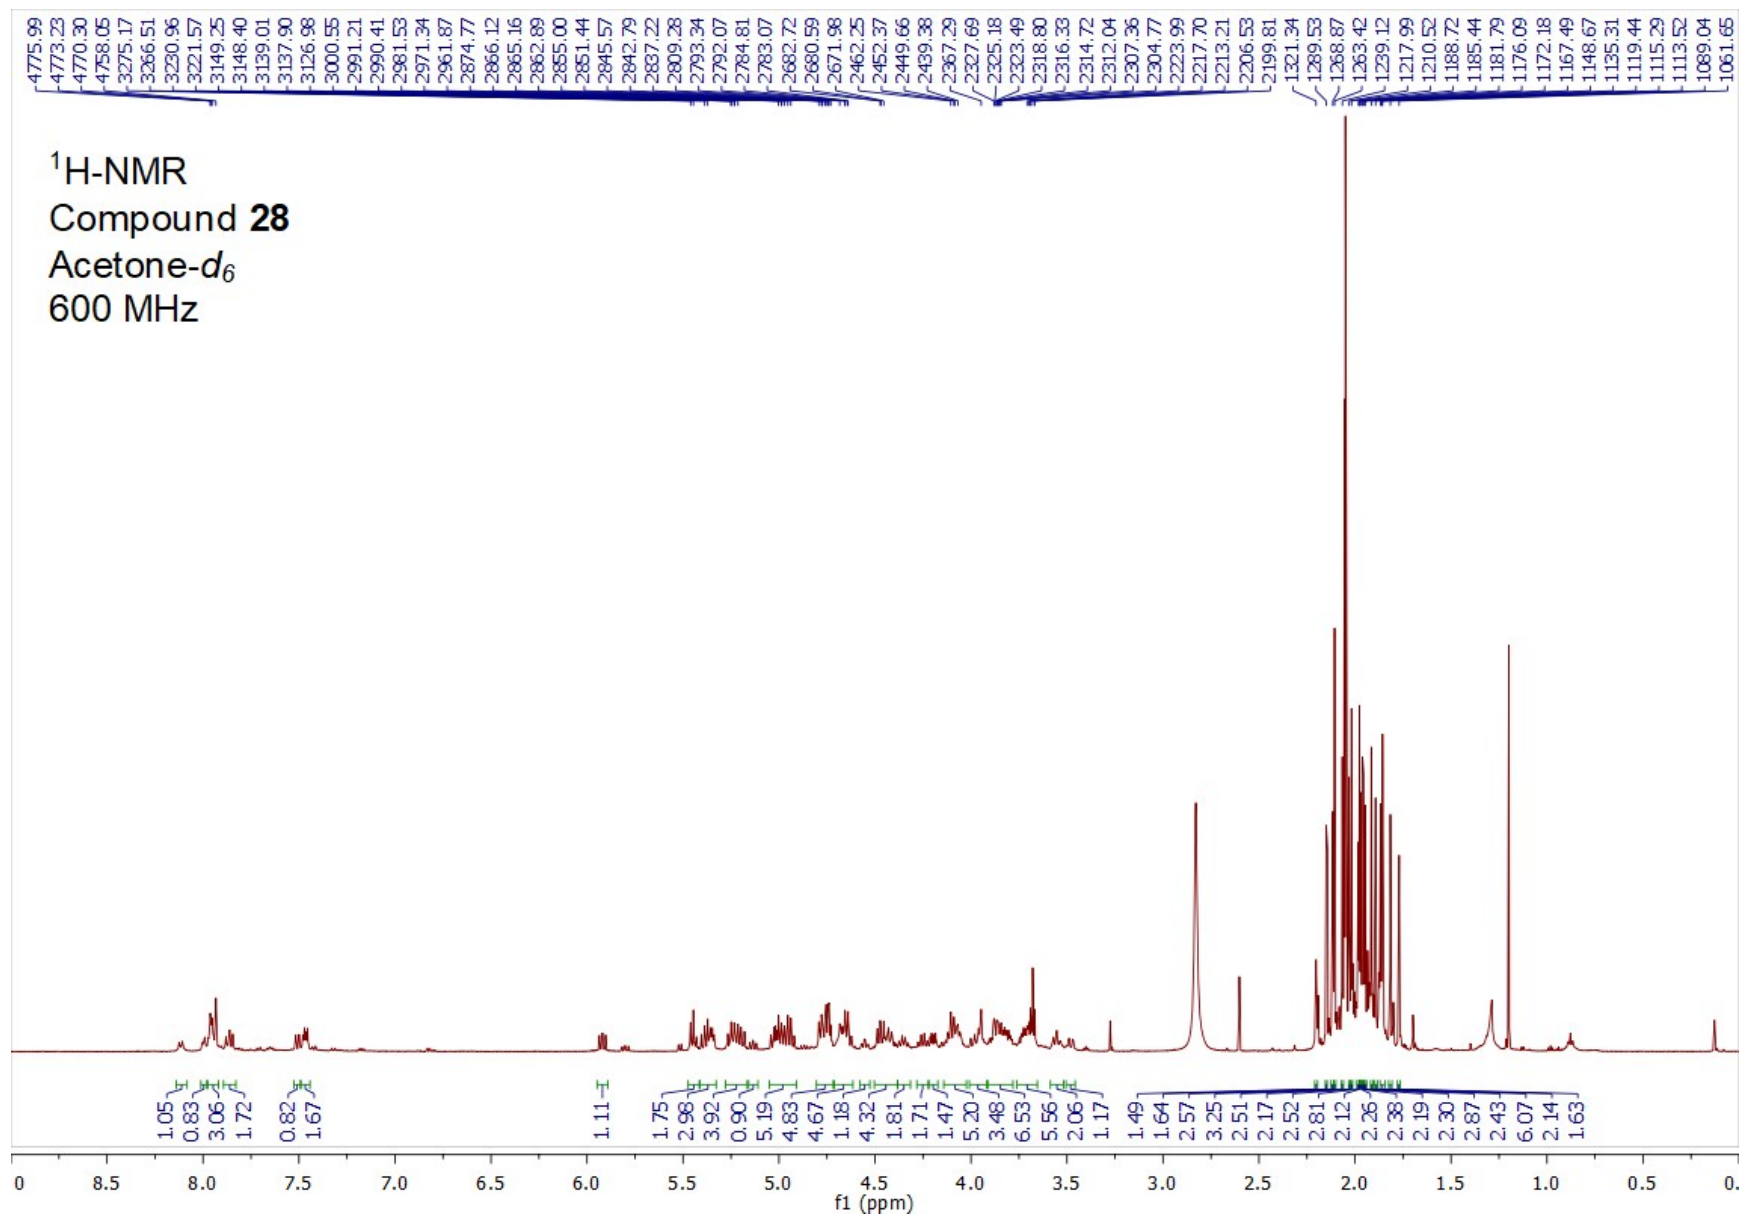

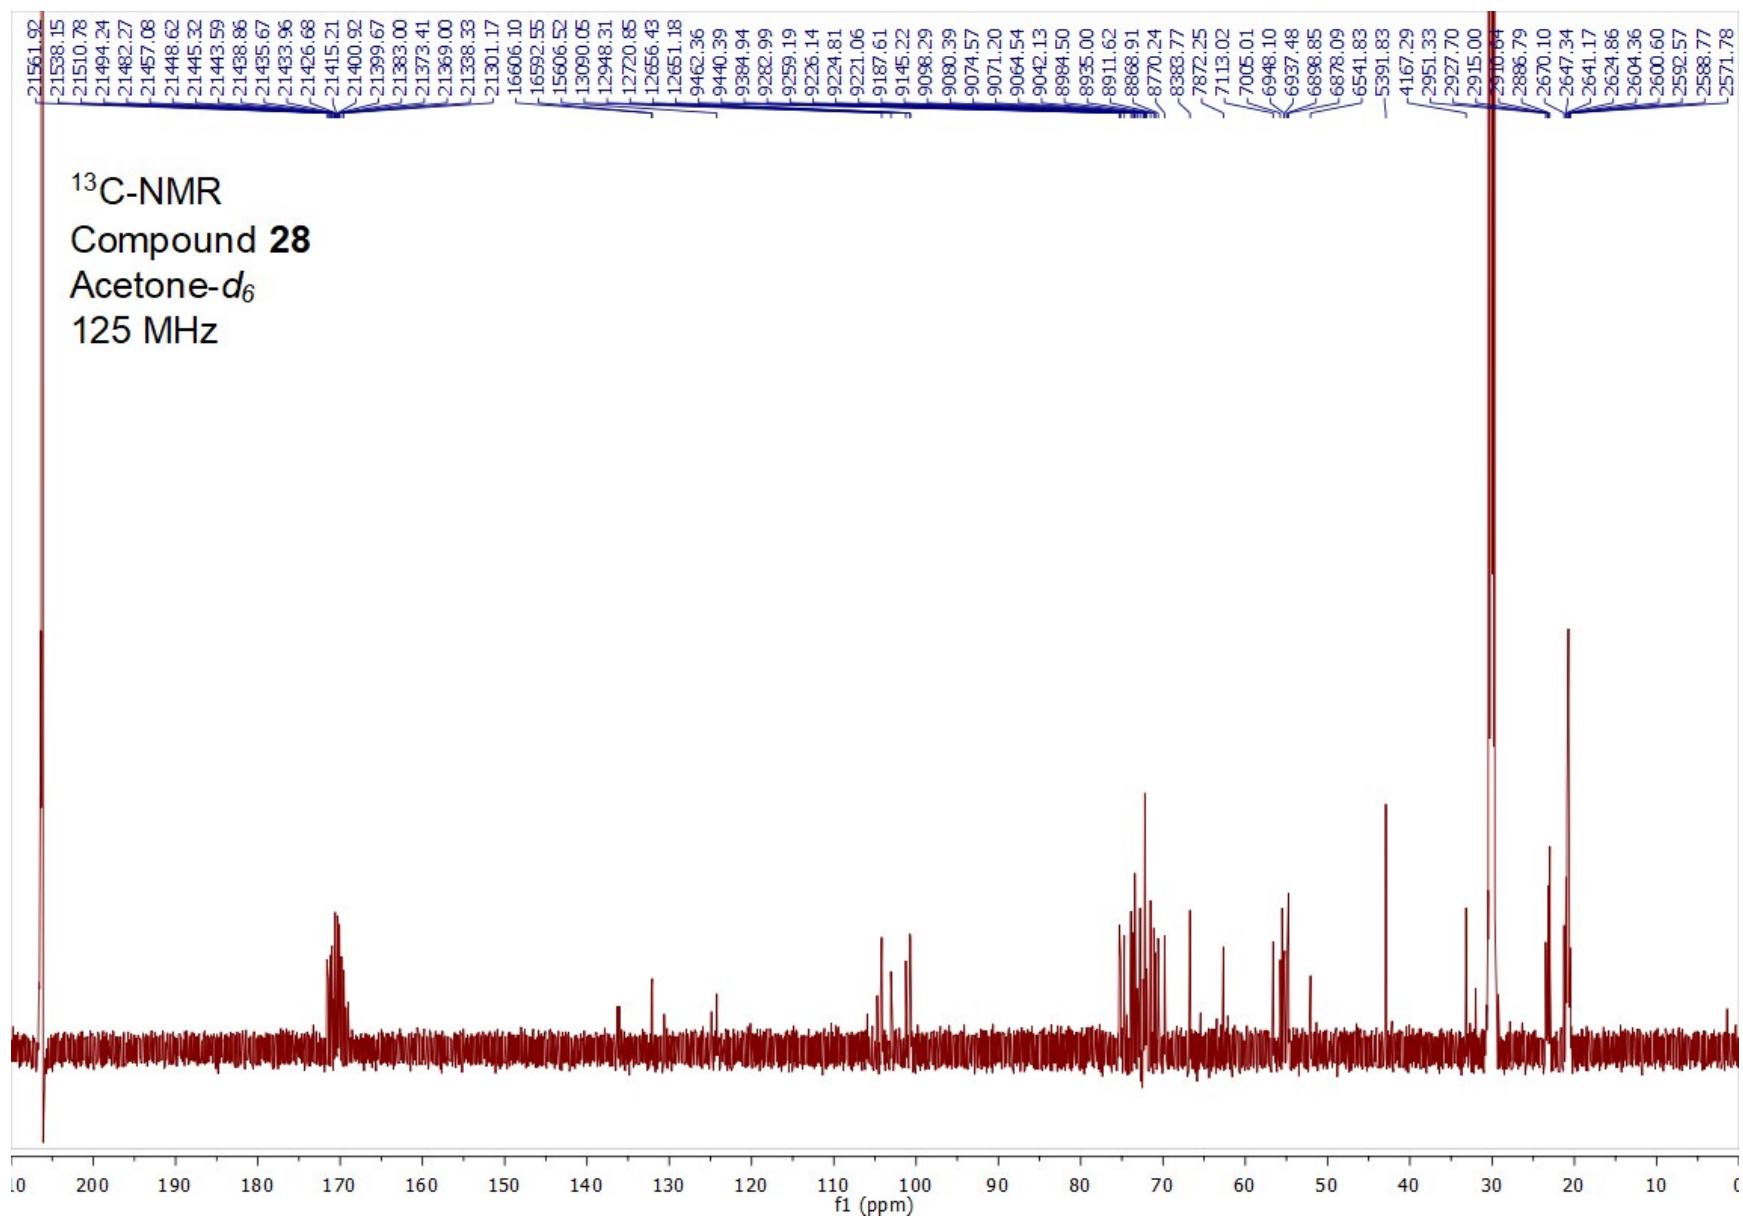



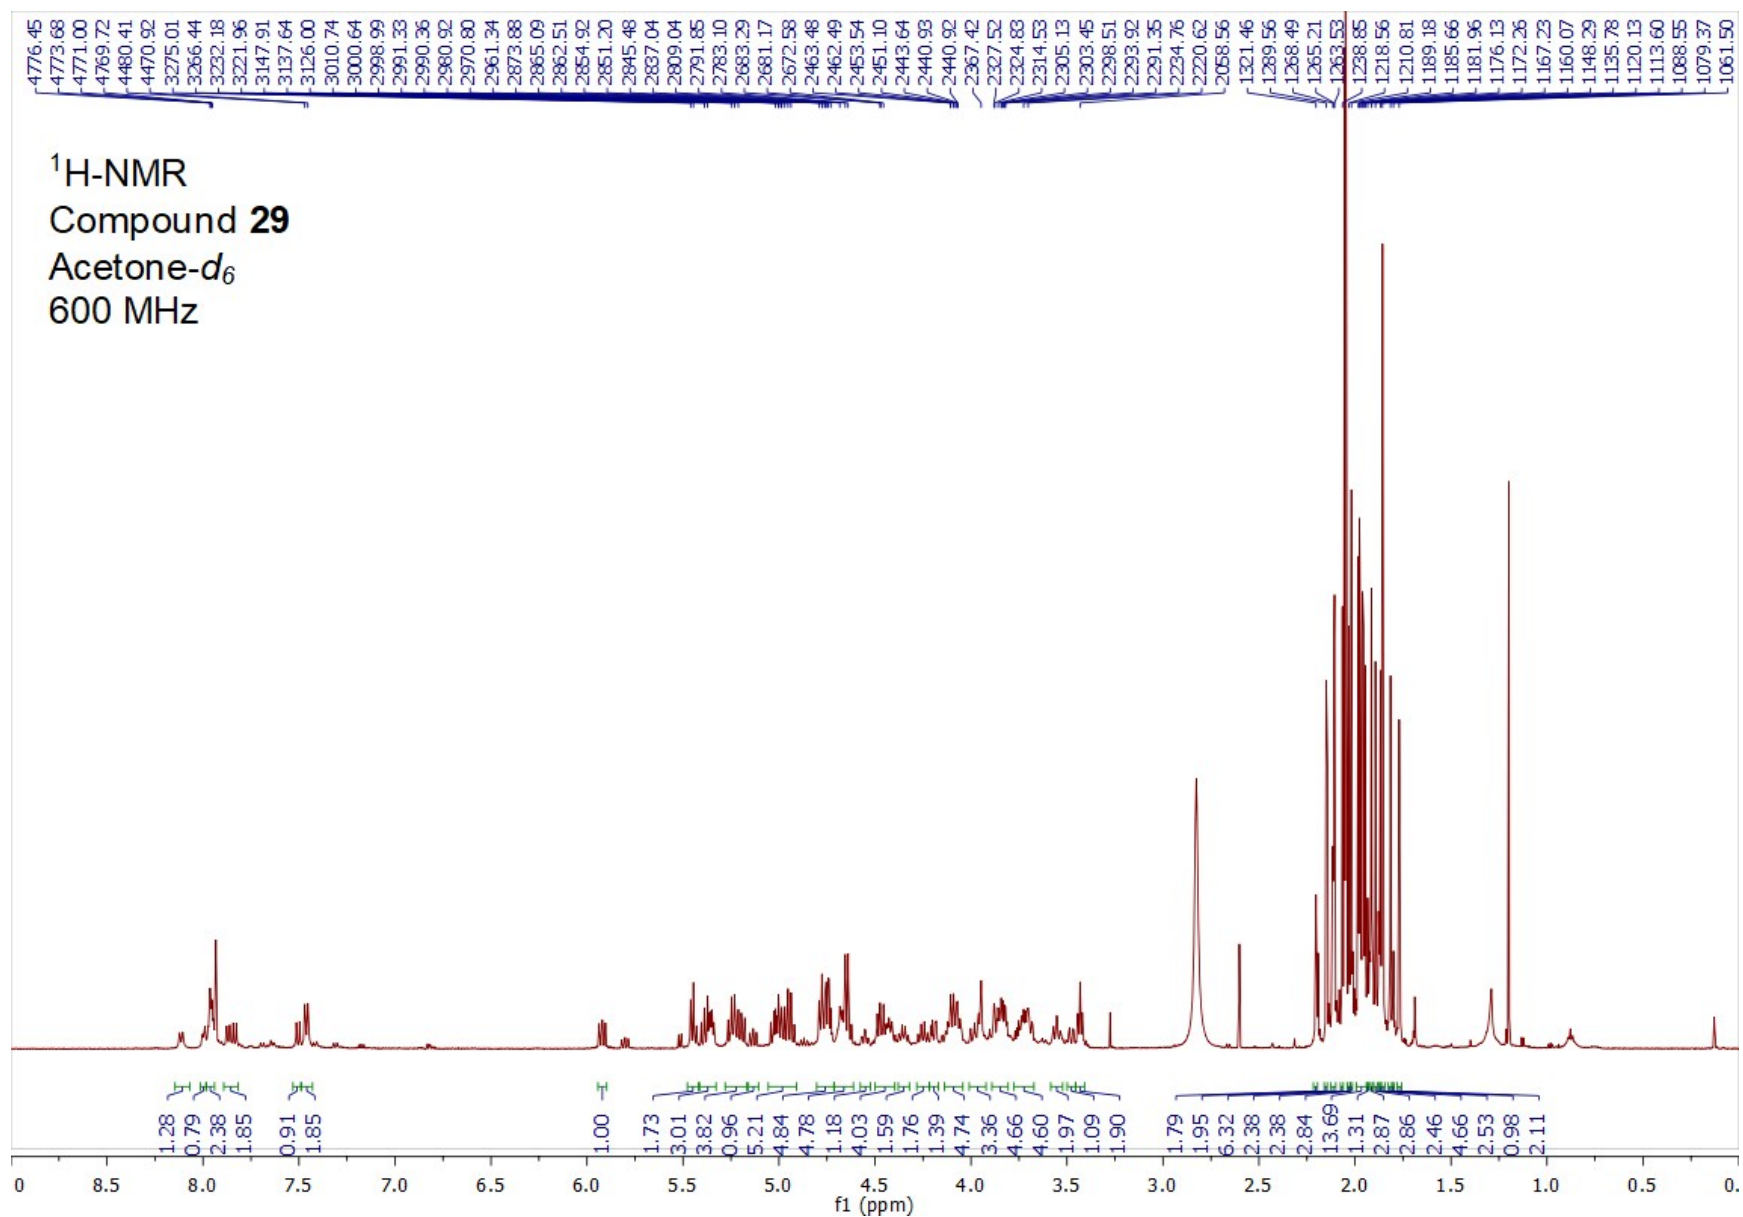

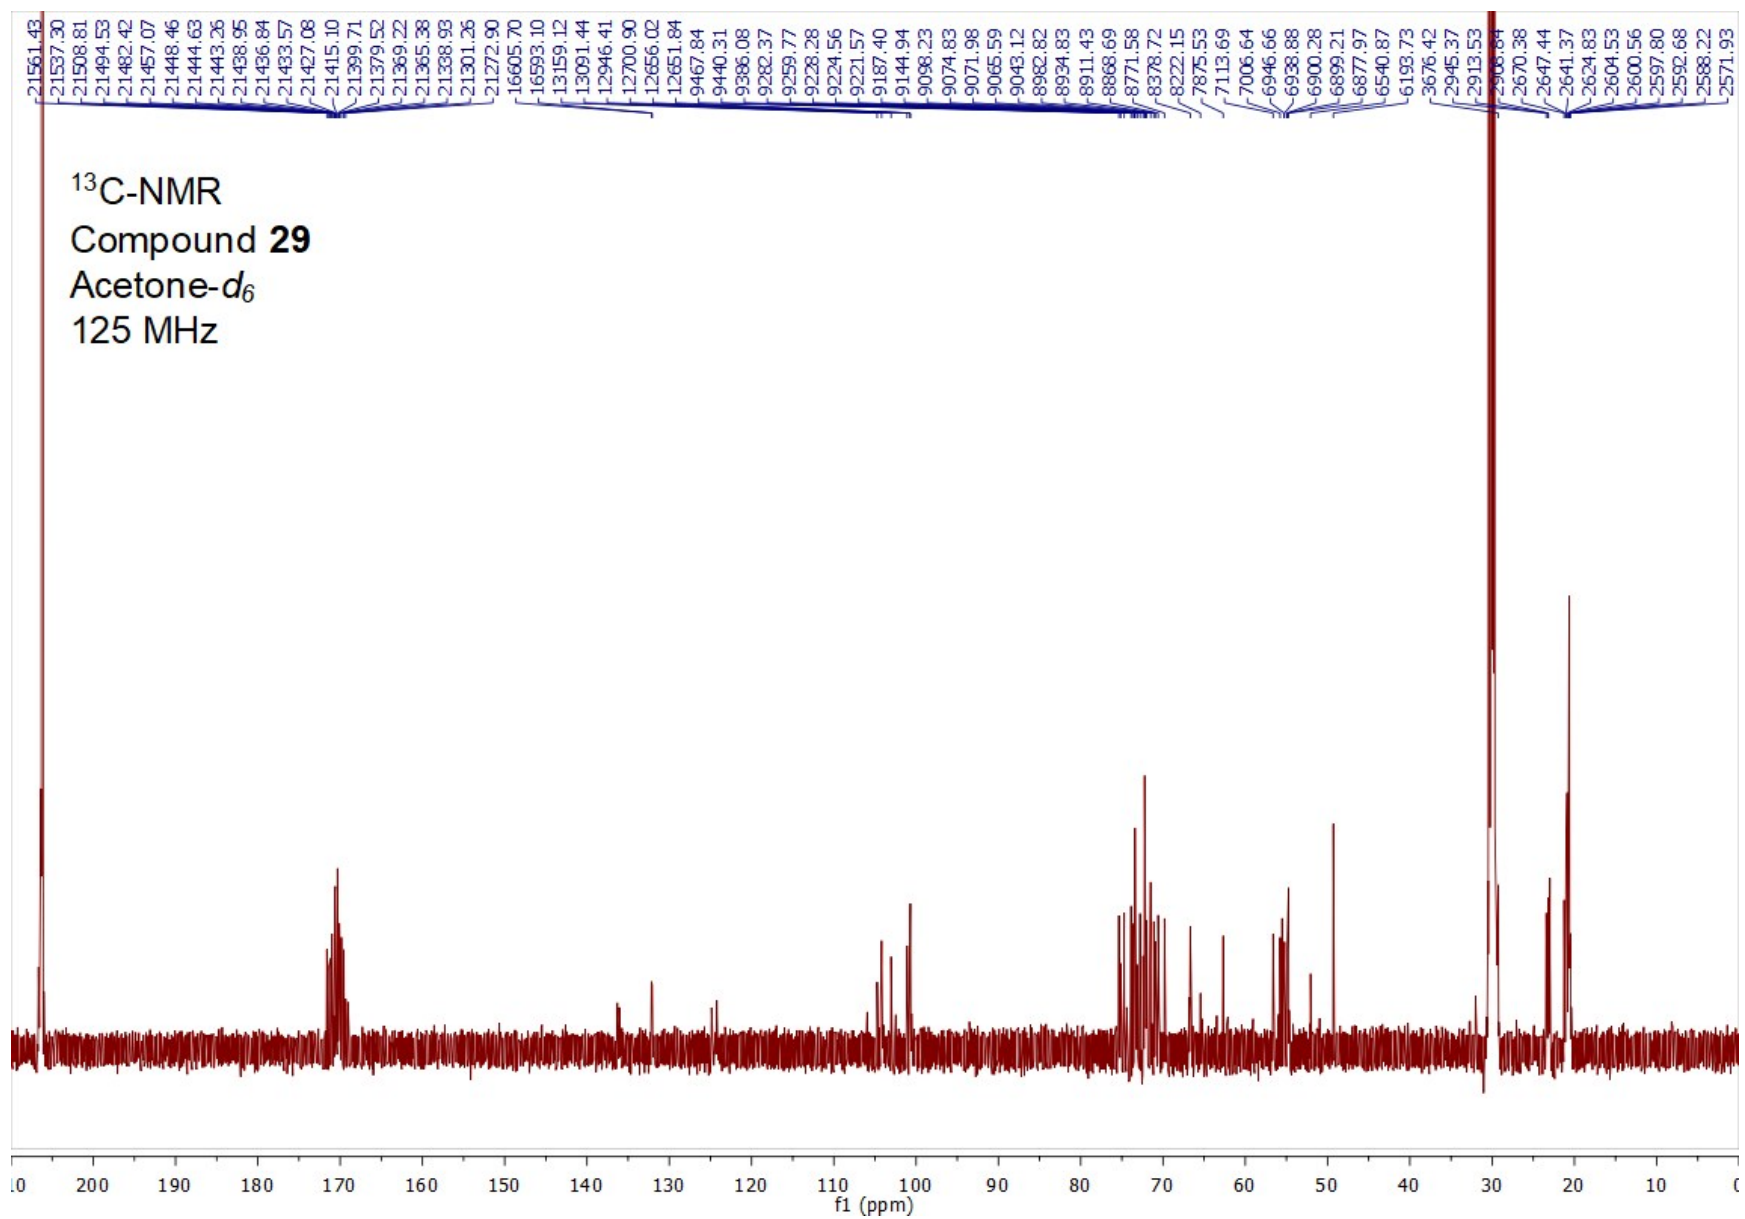



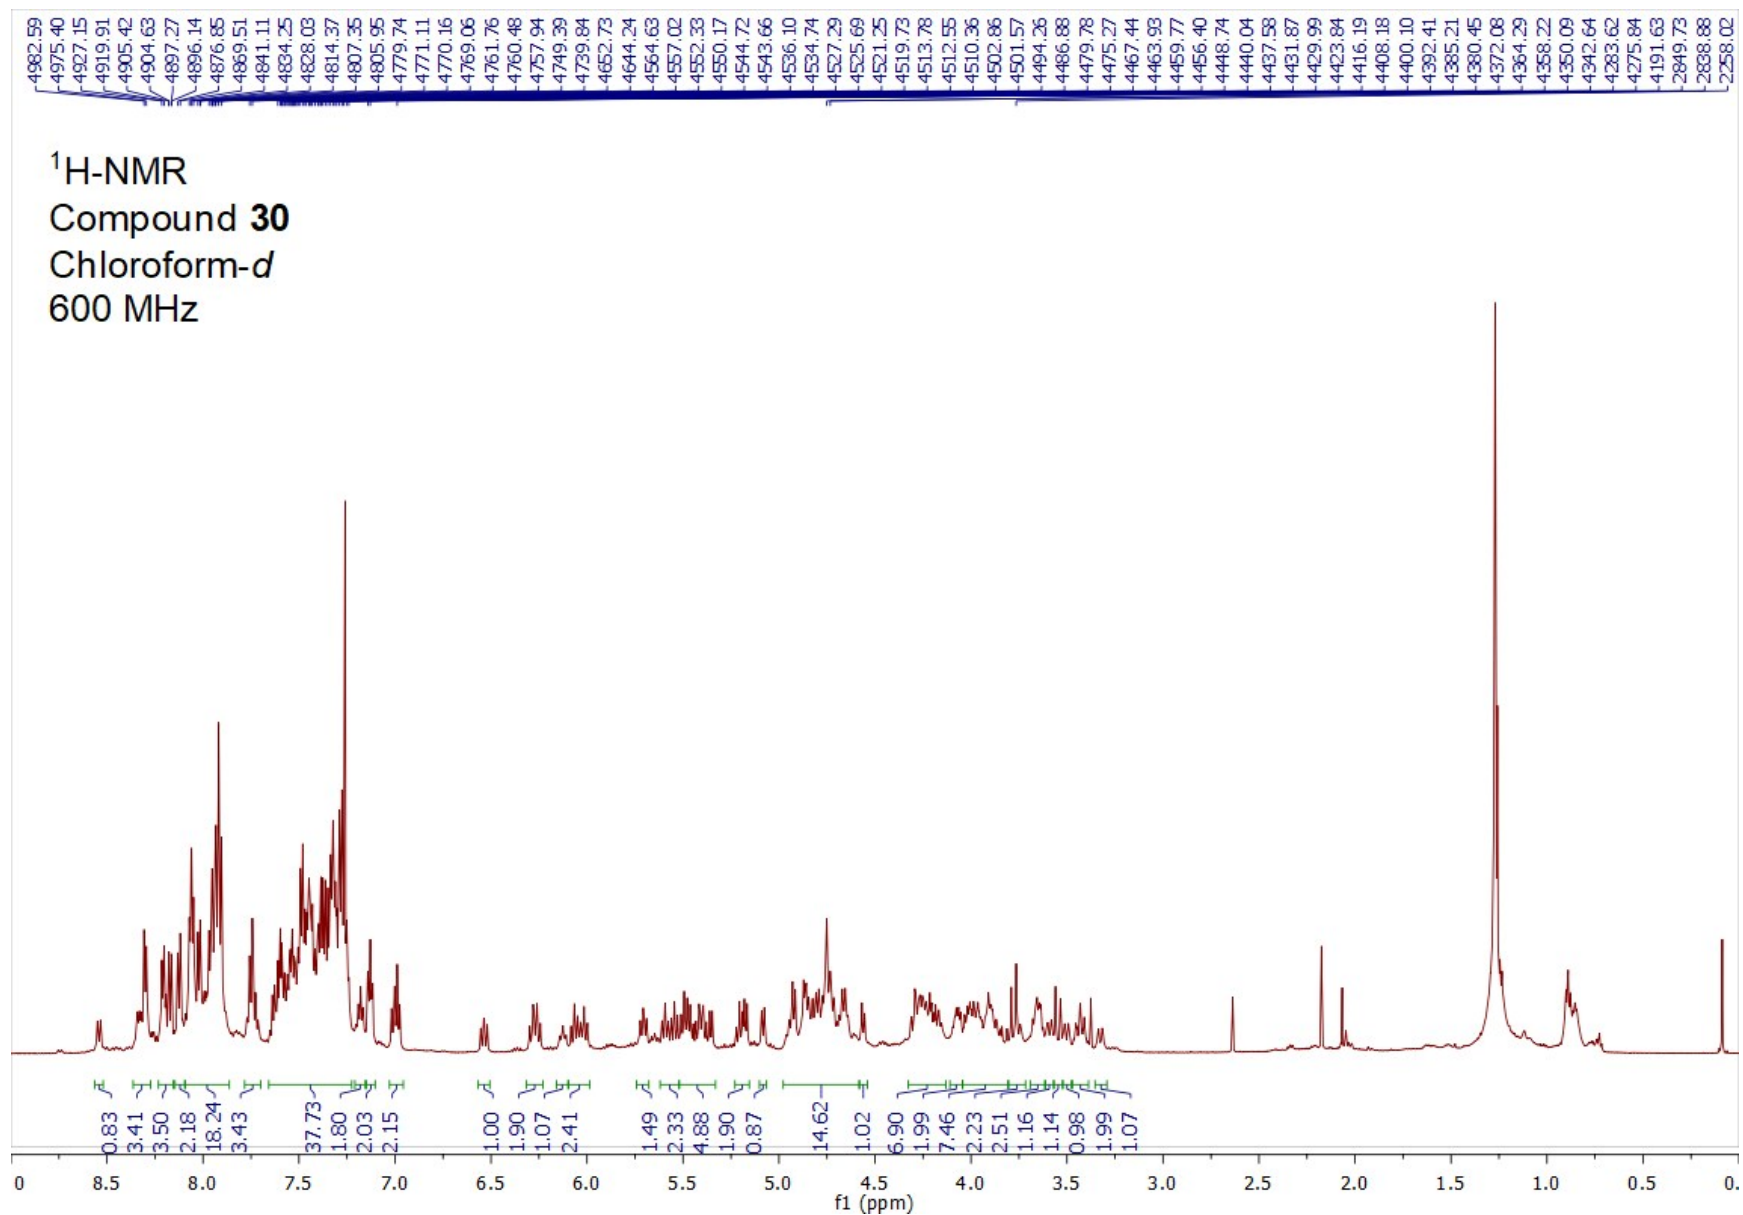

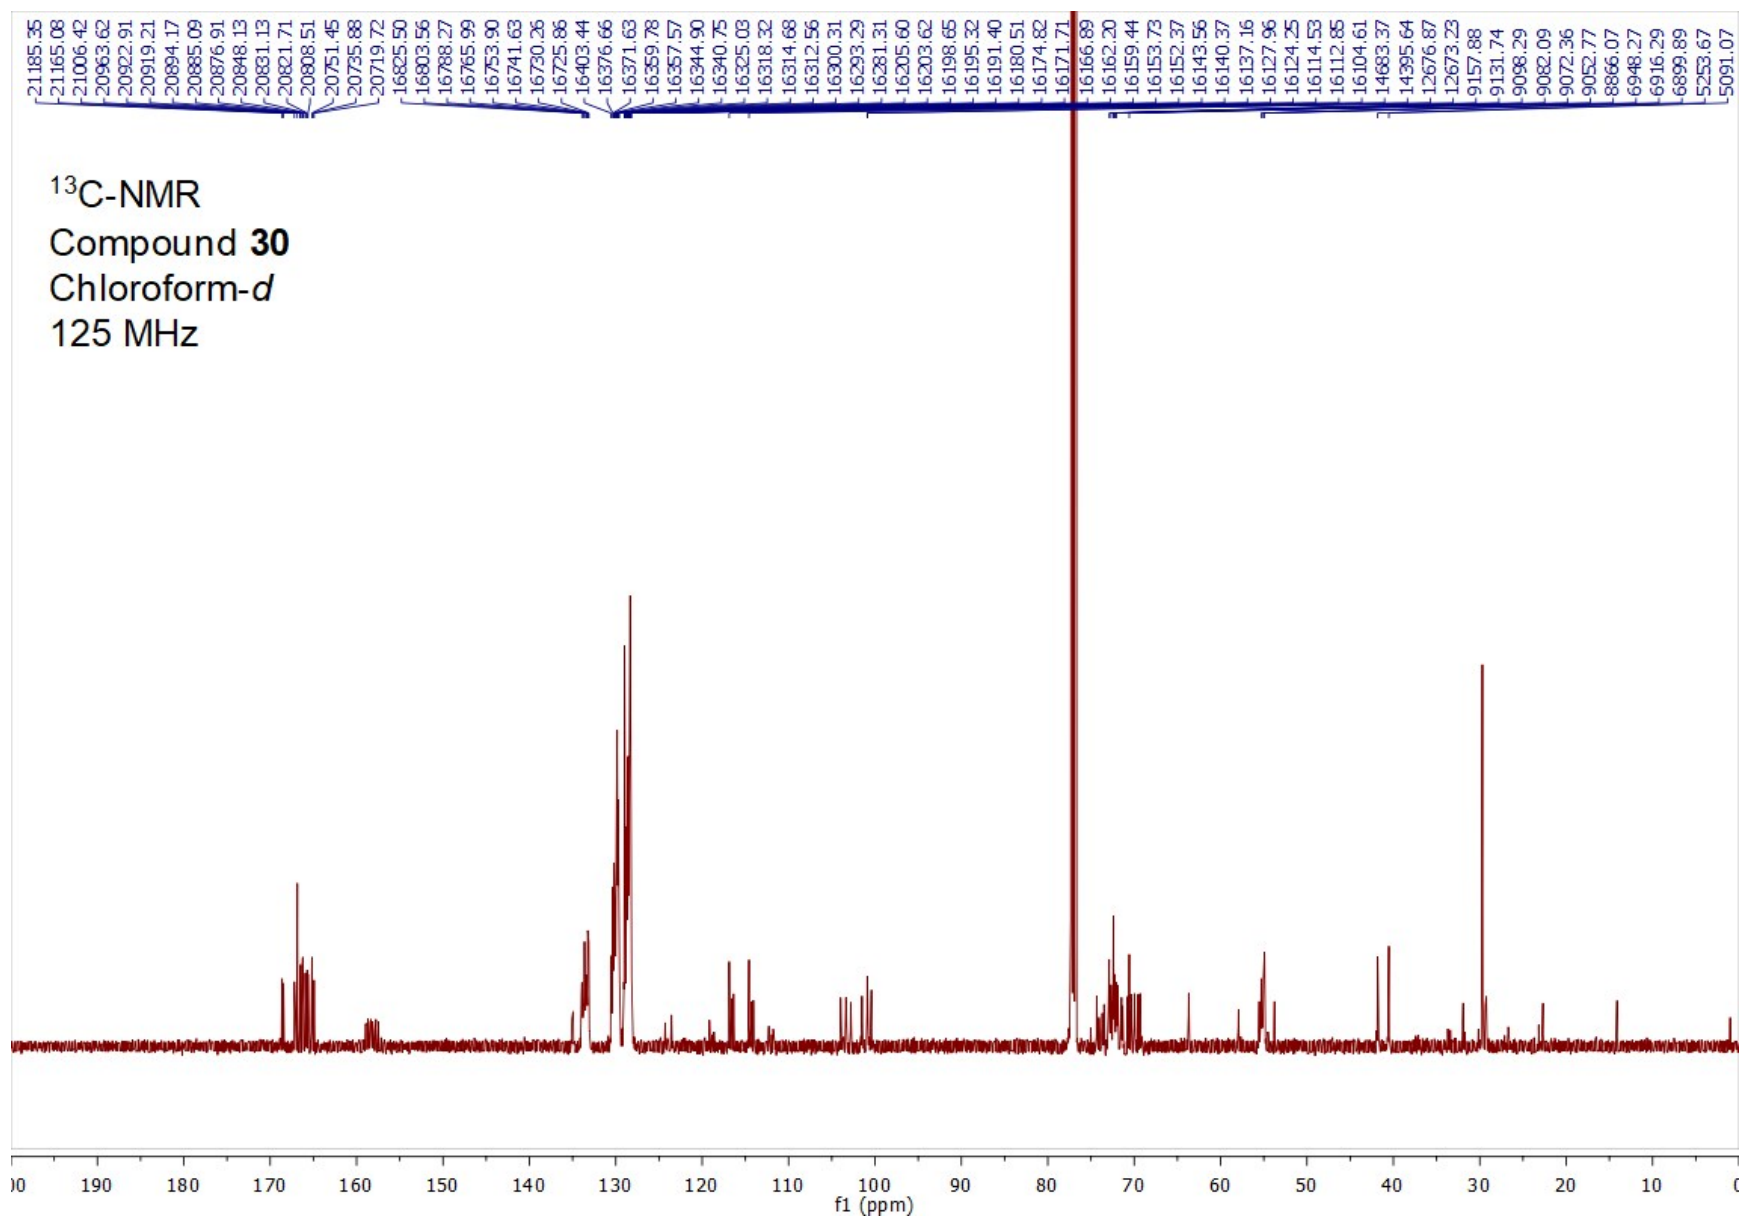

<sup>1</sup>H-NMR  
Compound **34**  
Chloroform-*d*  
400 MHz

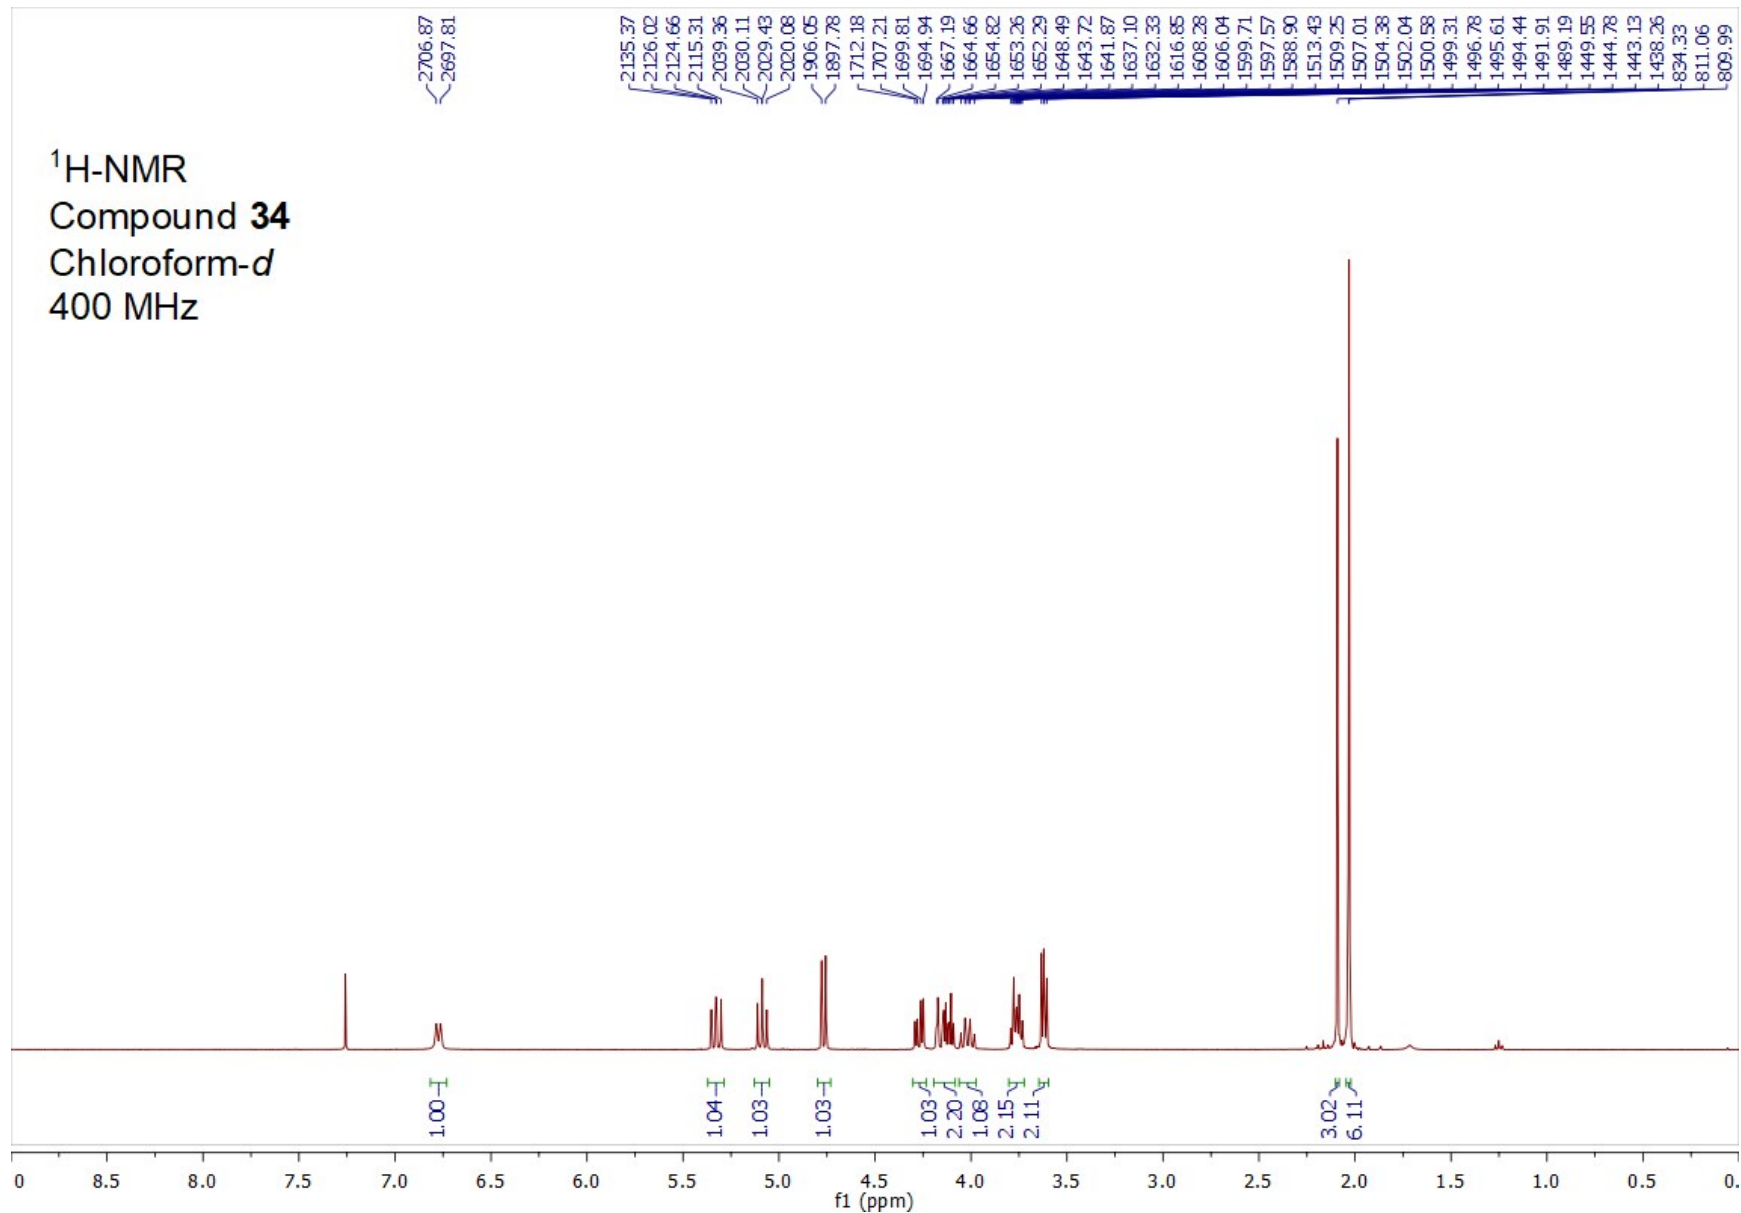

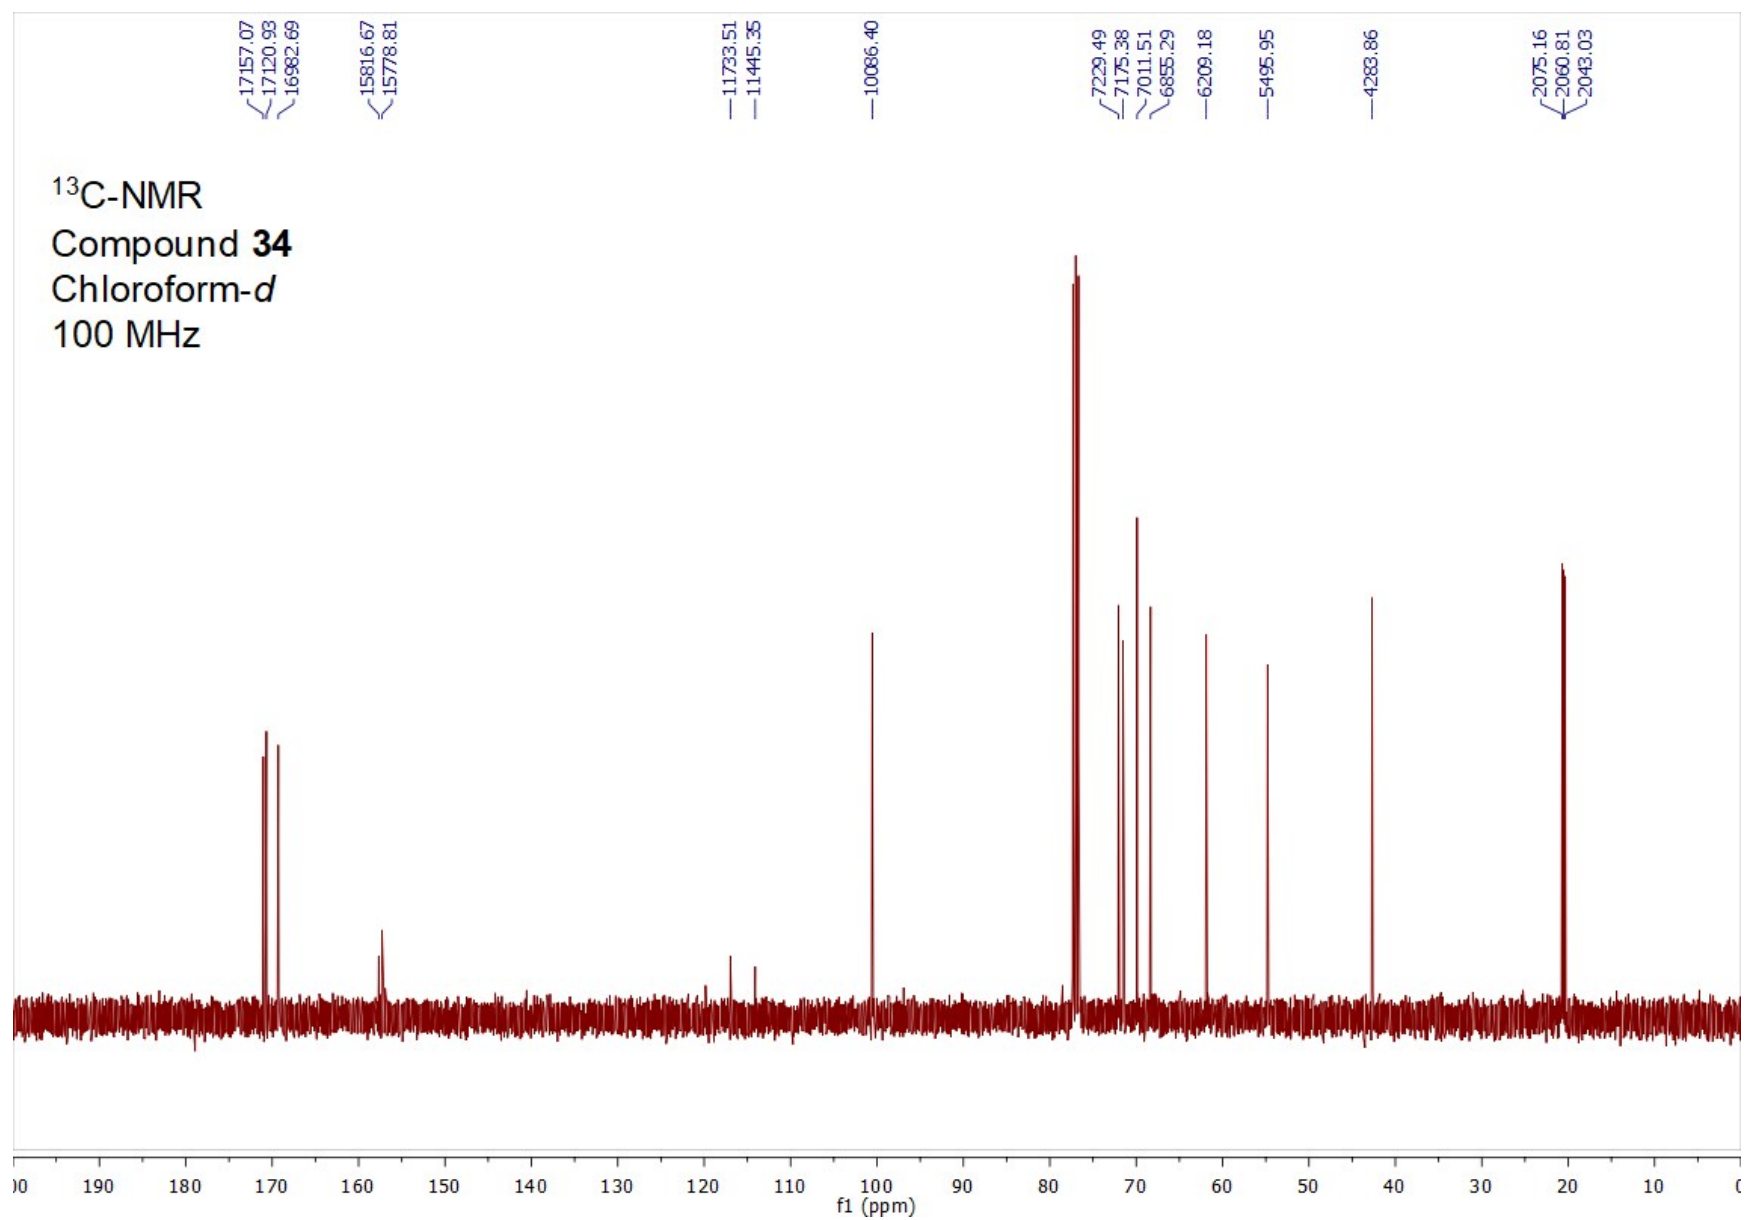

<sup>1</sup>H-NMR  
Compound **36**  
Chloroform-*d*  
400 MHz

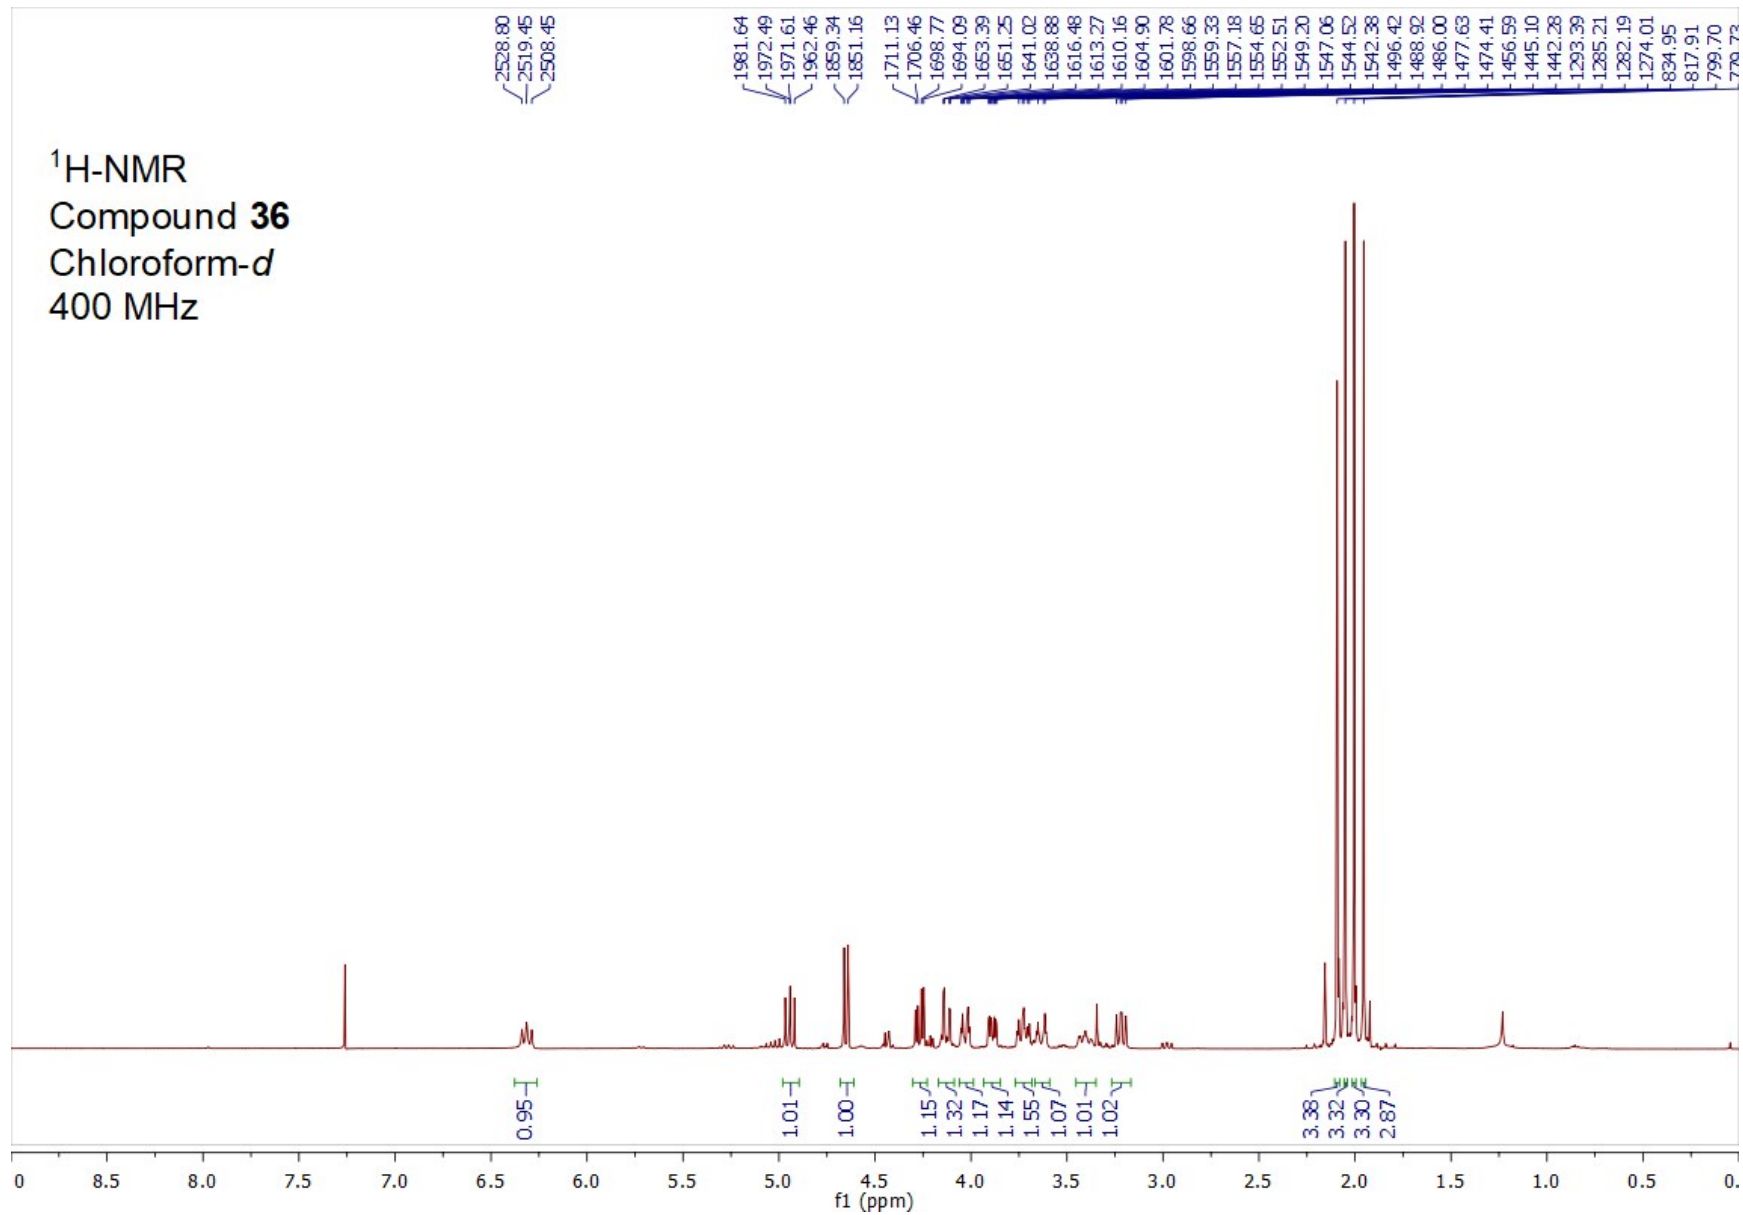

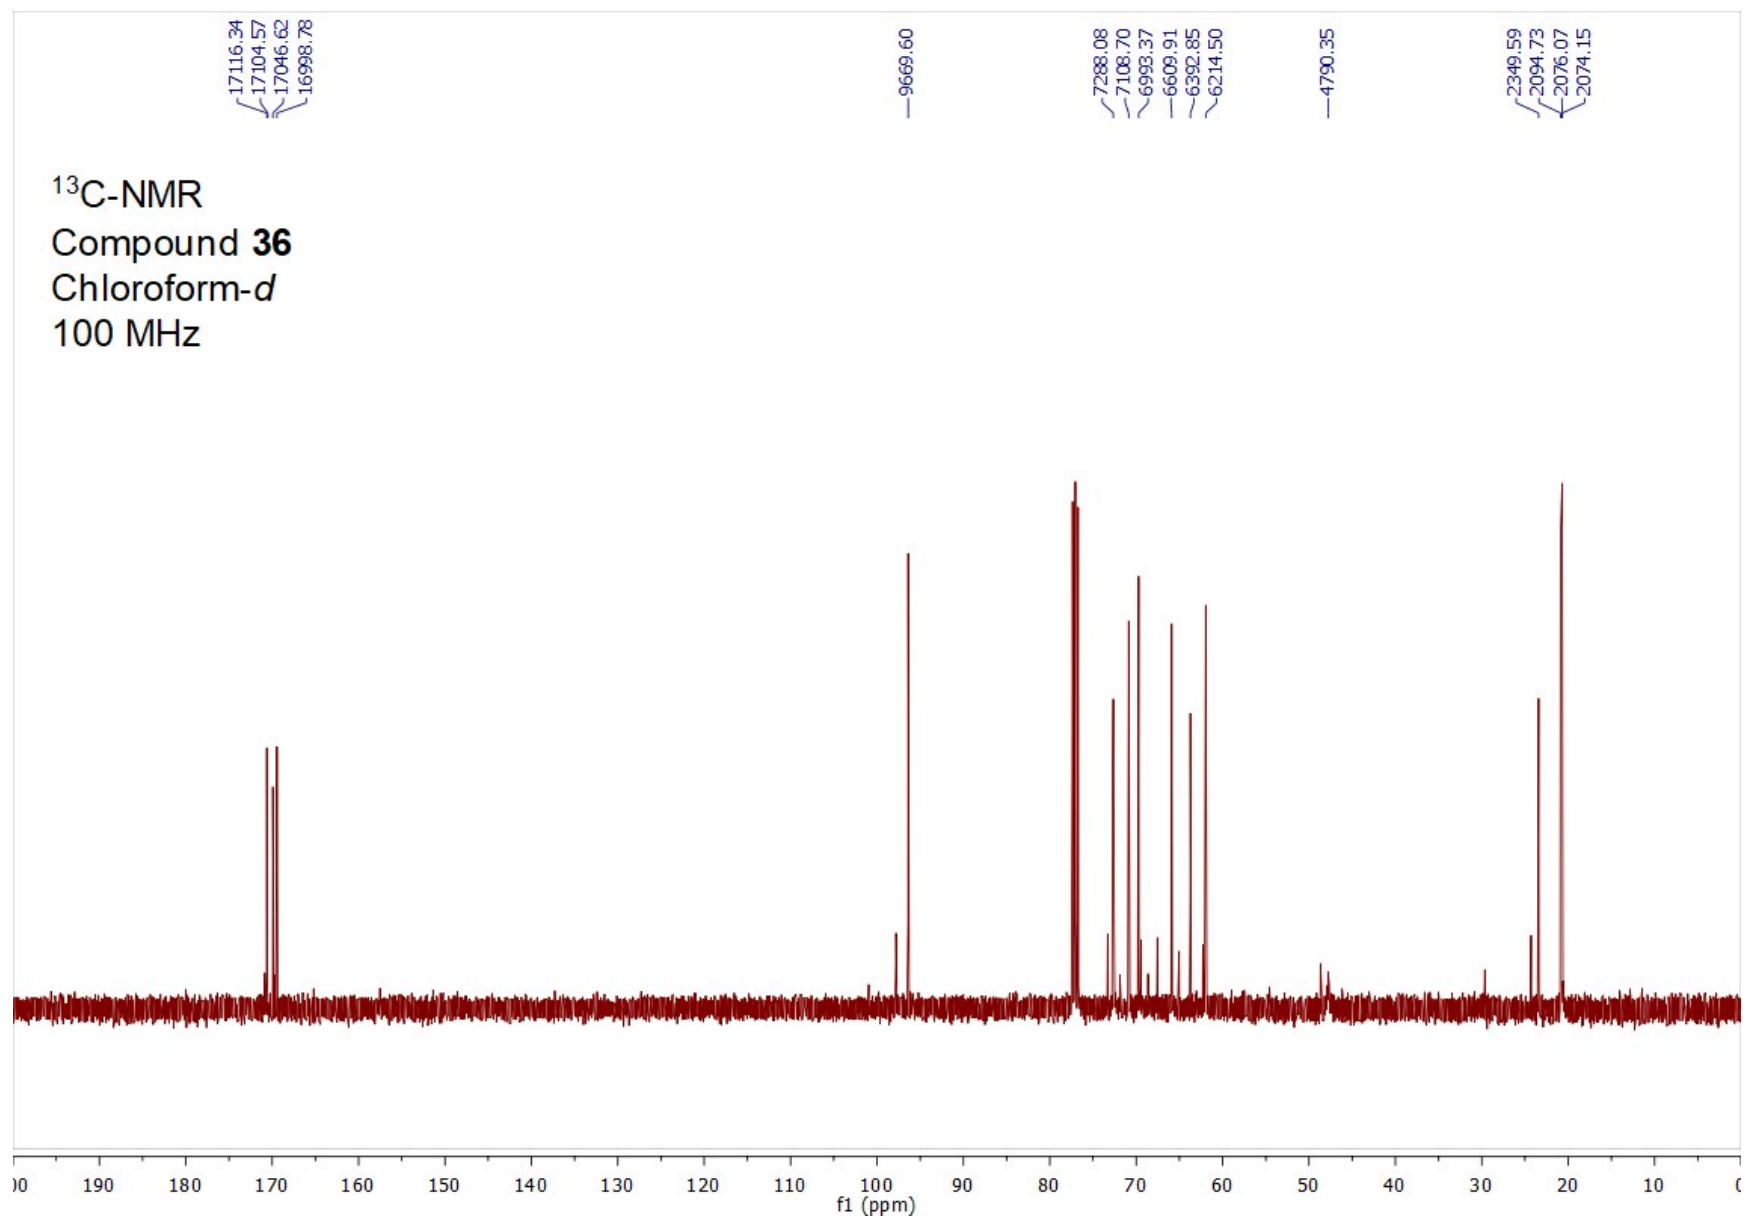

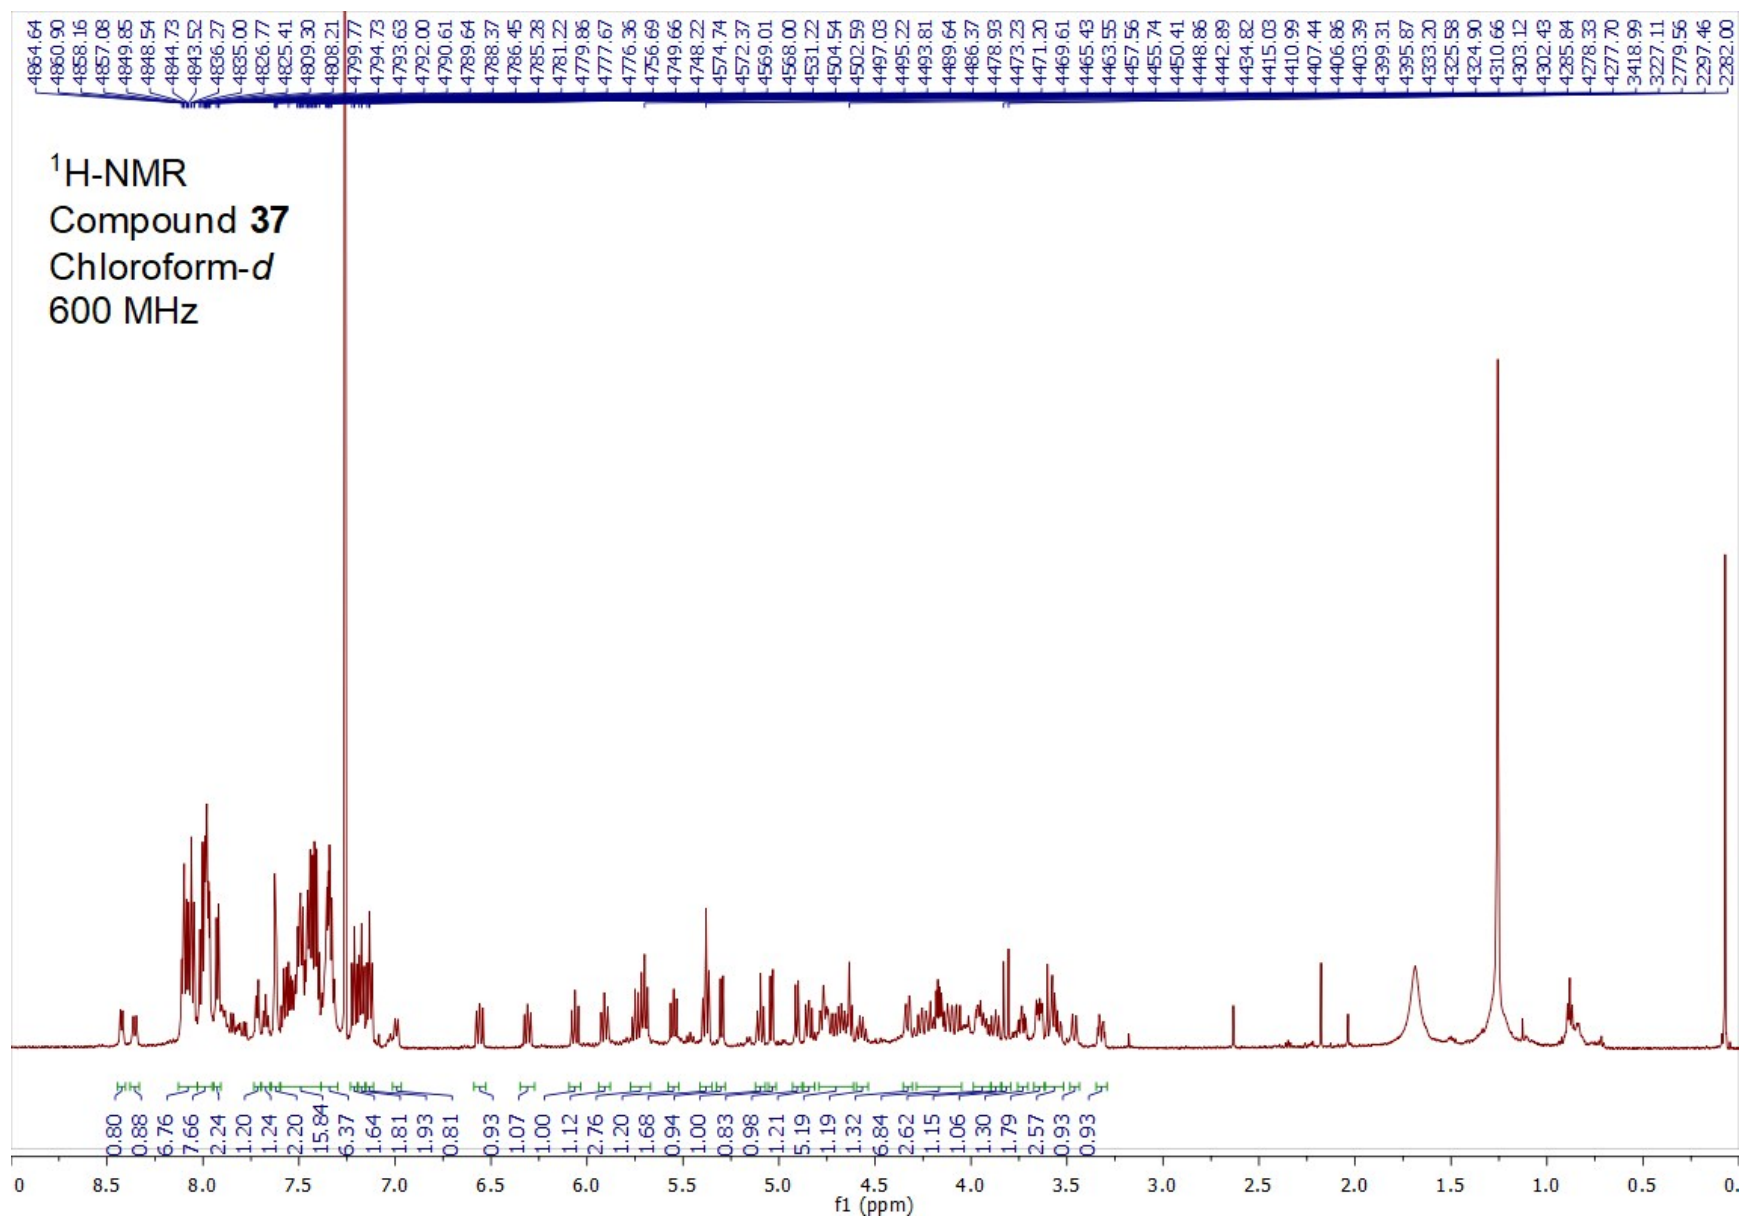



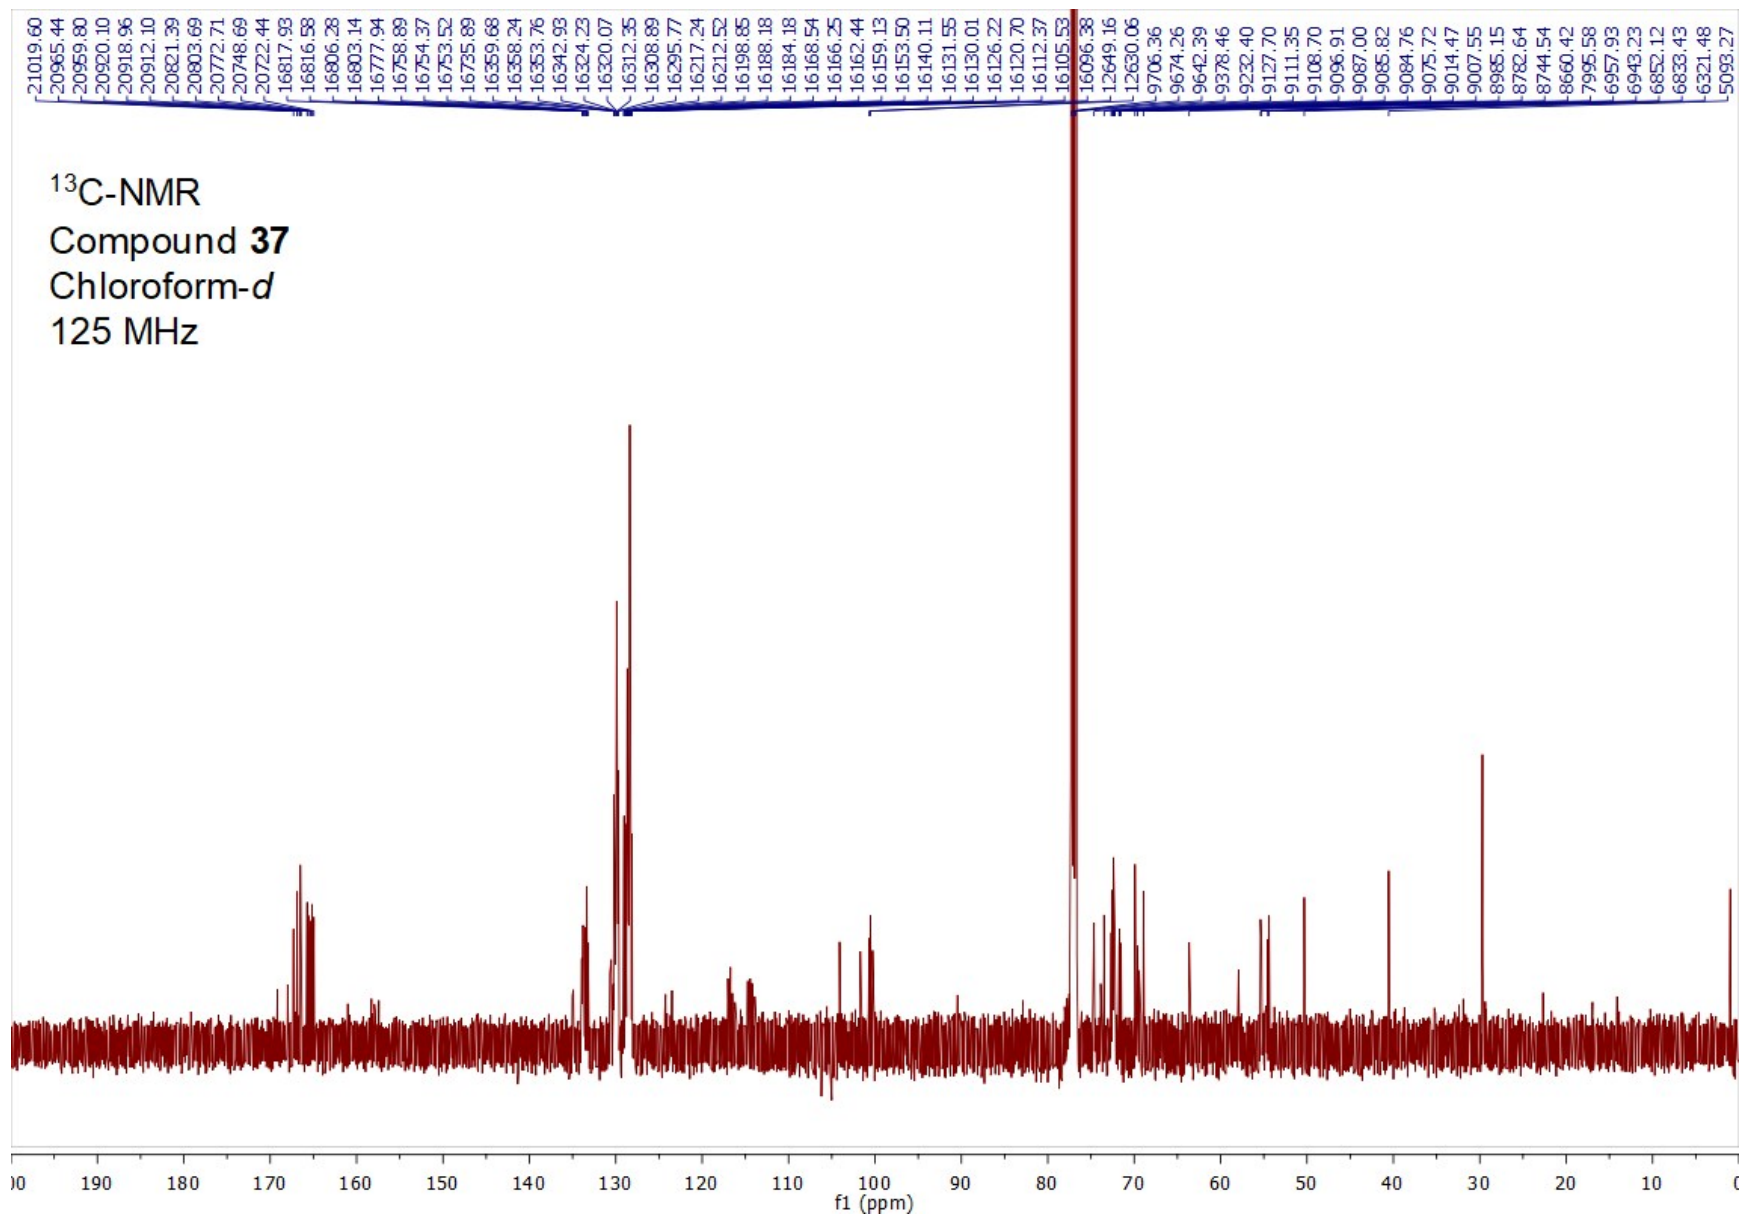



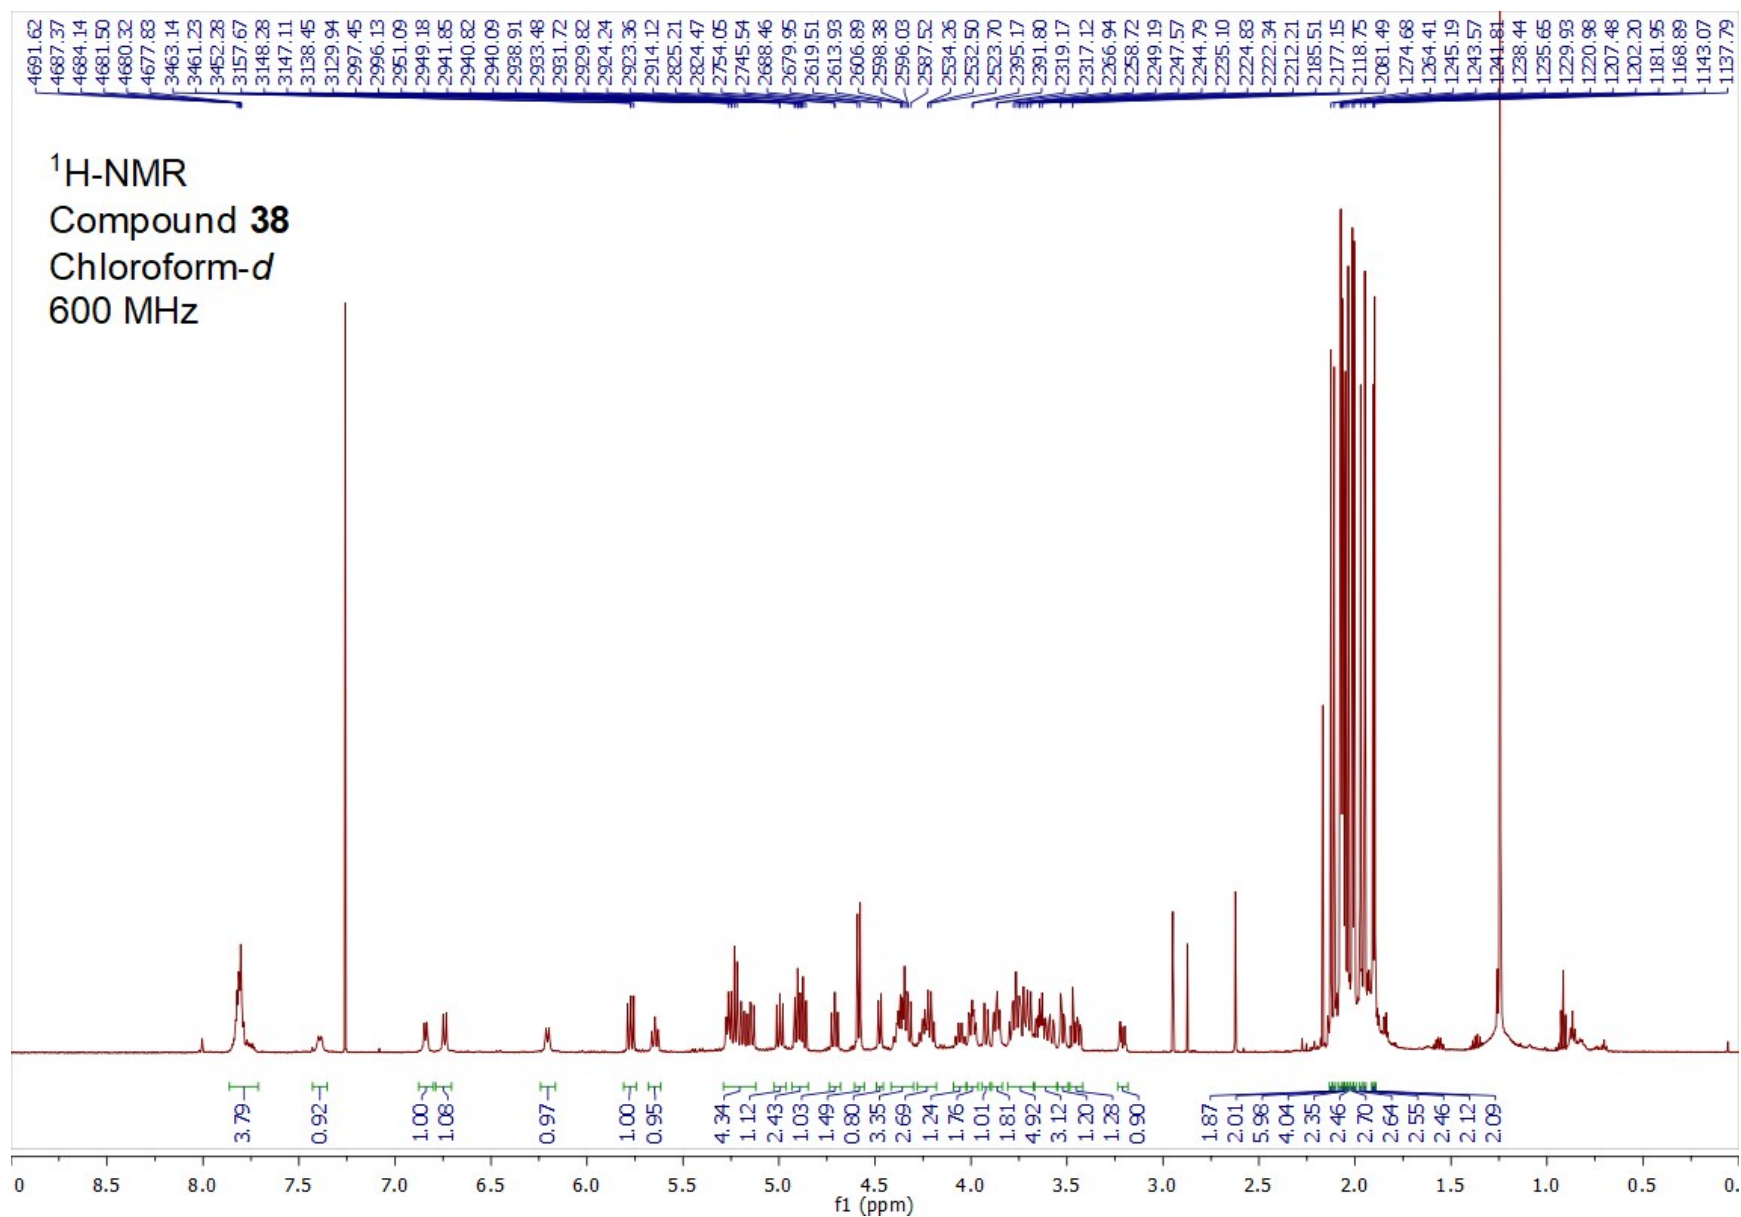

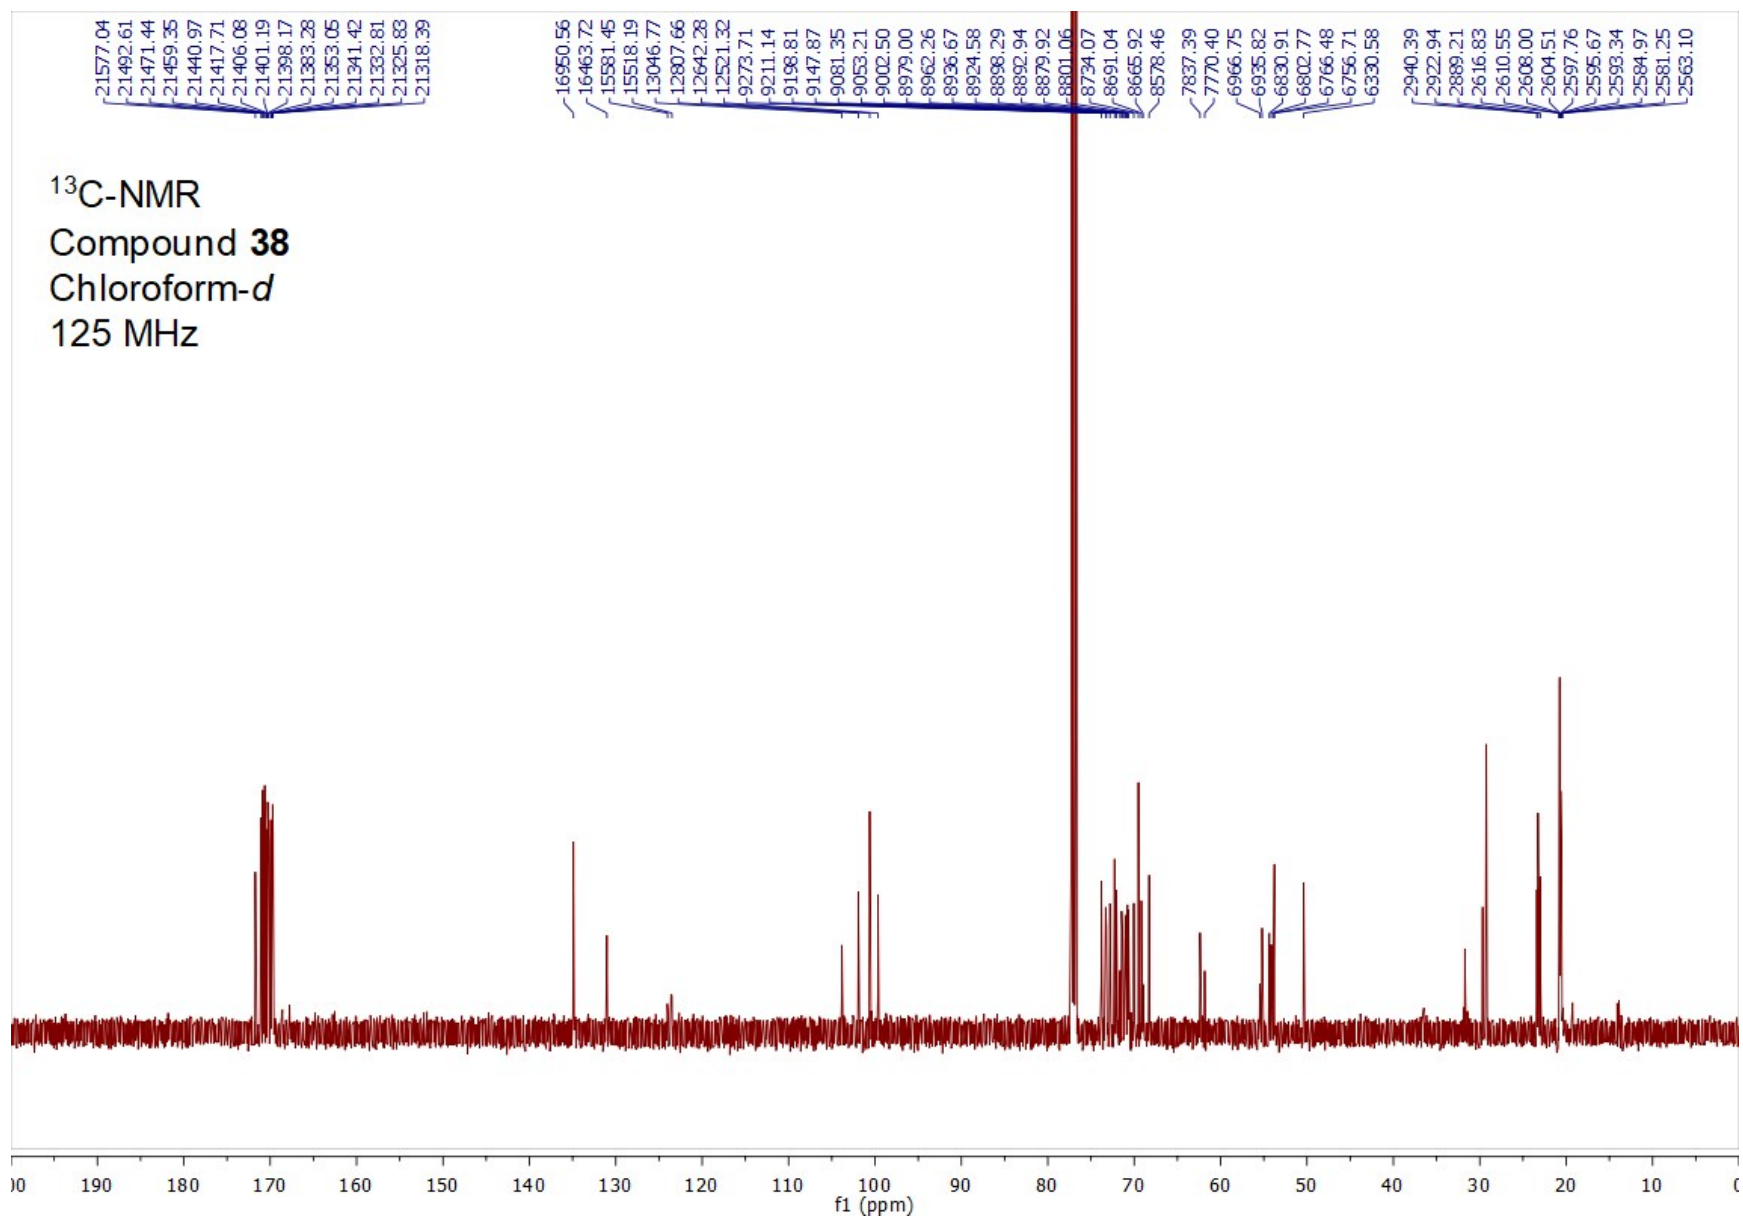

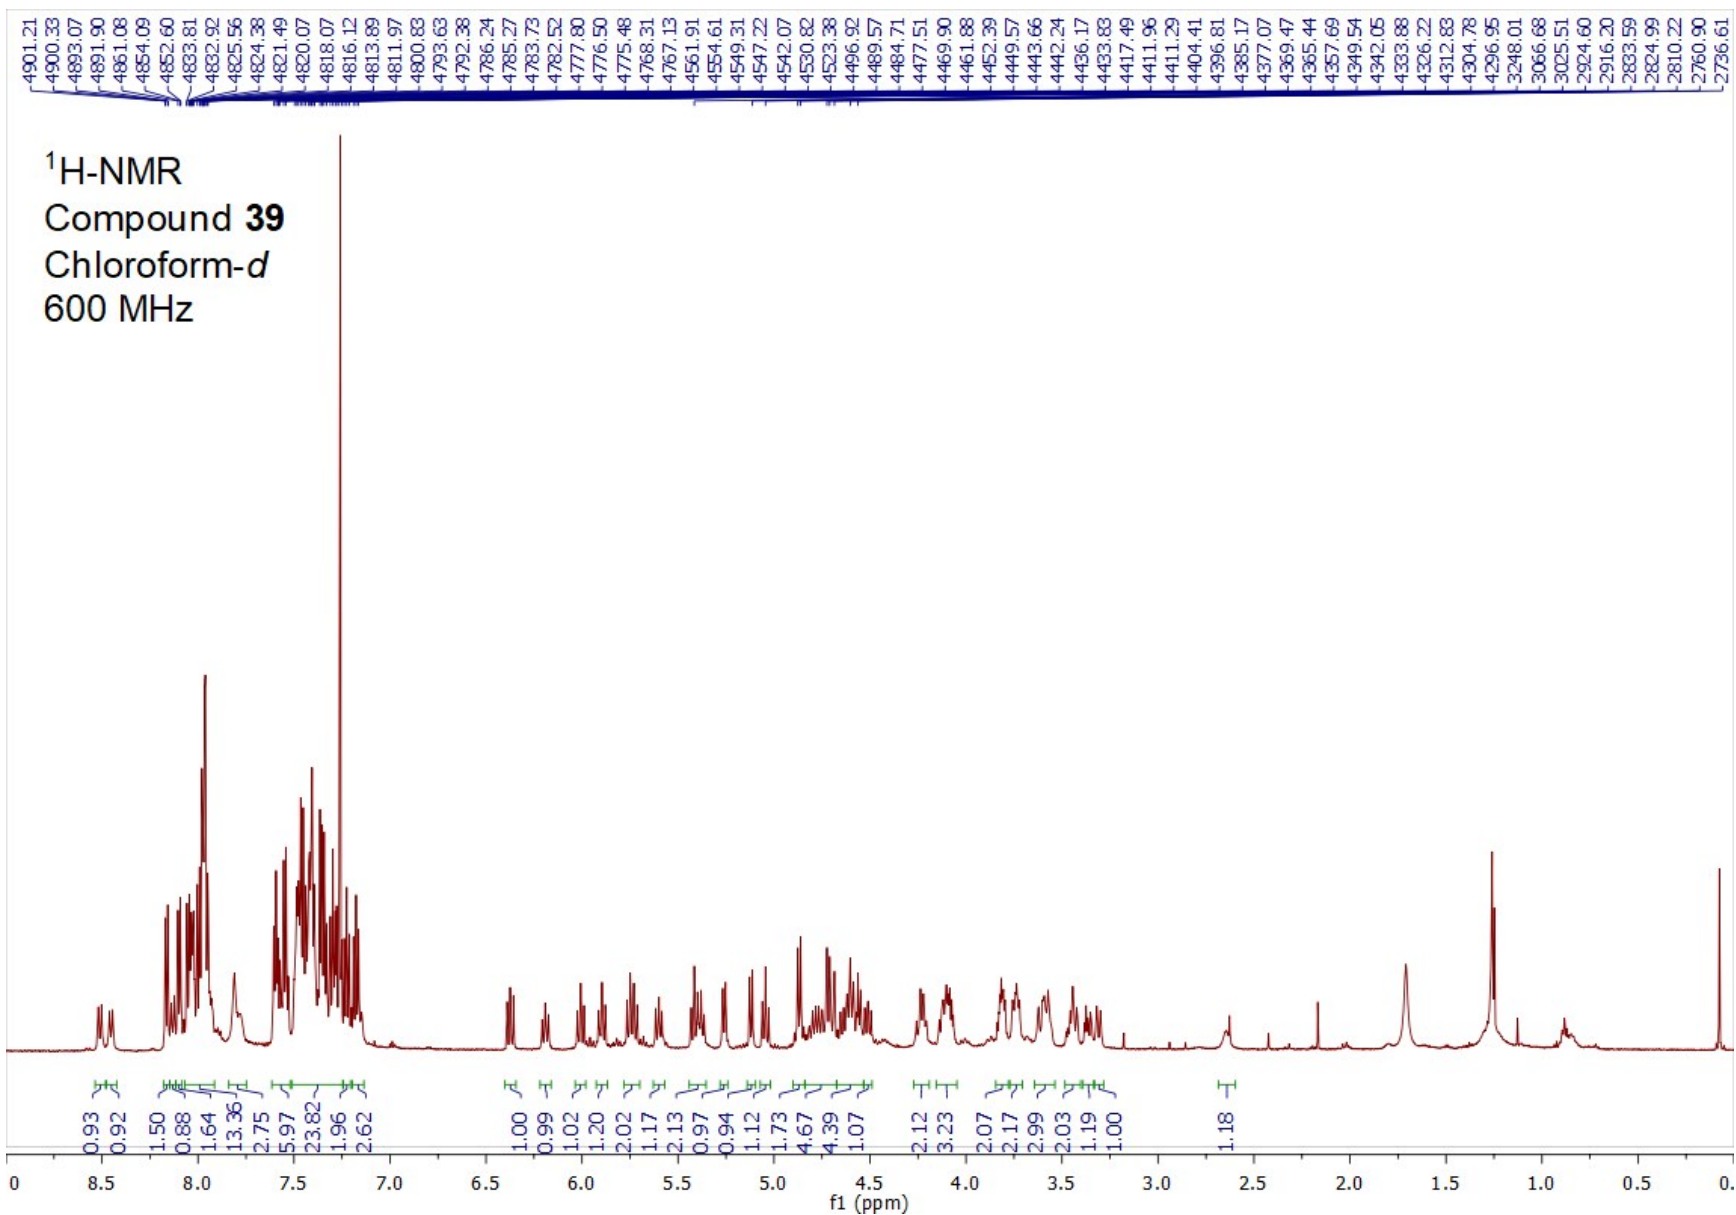

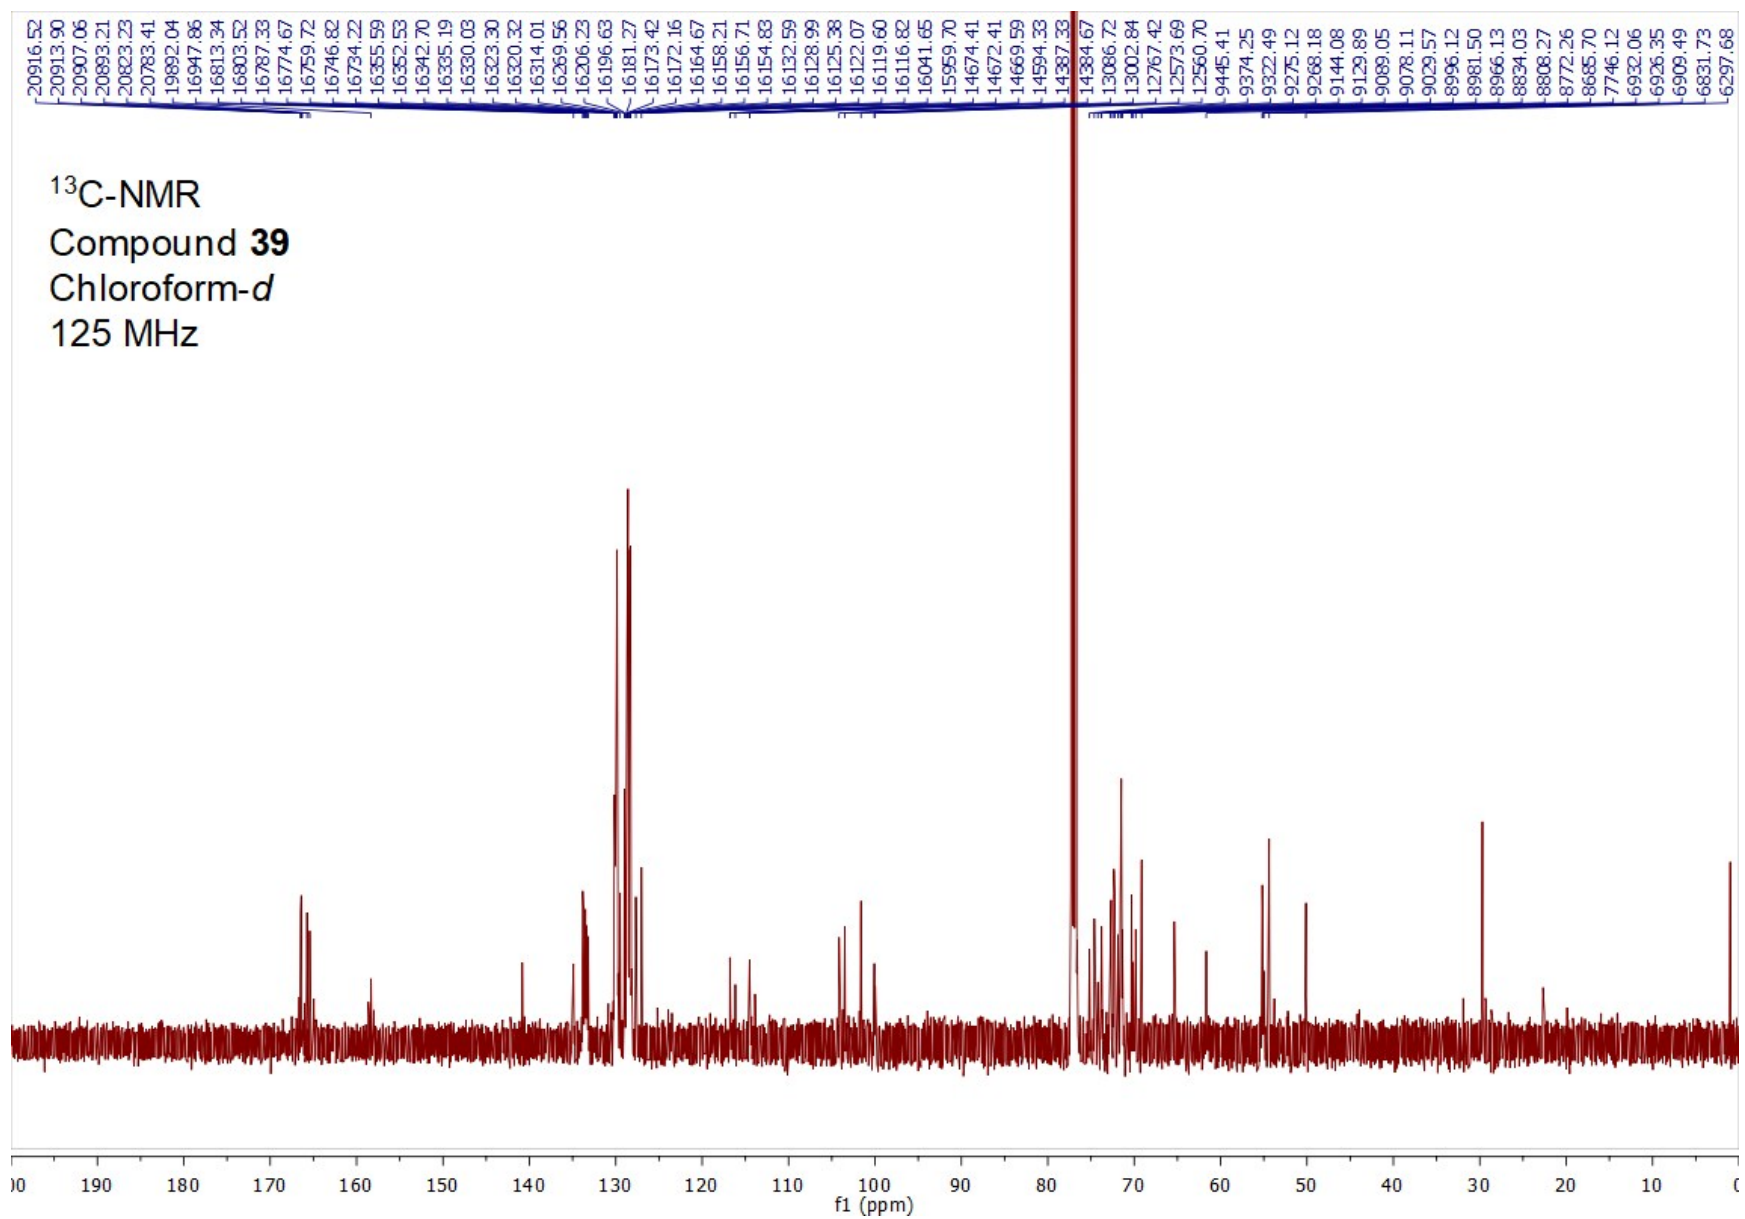

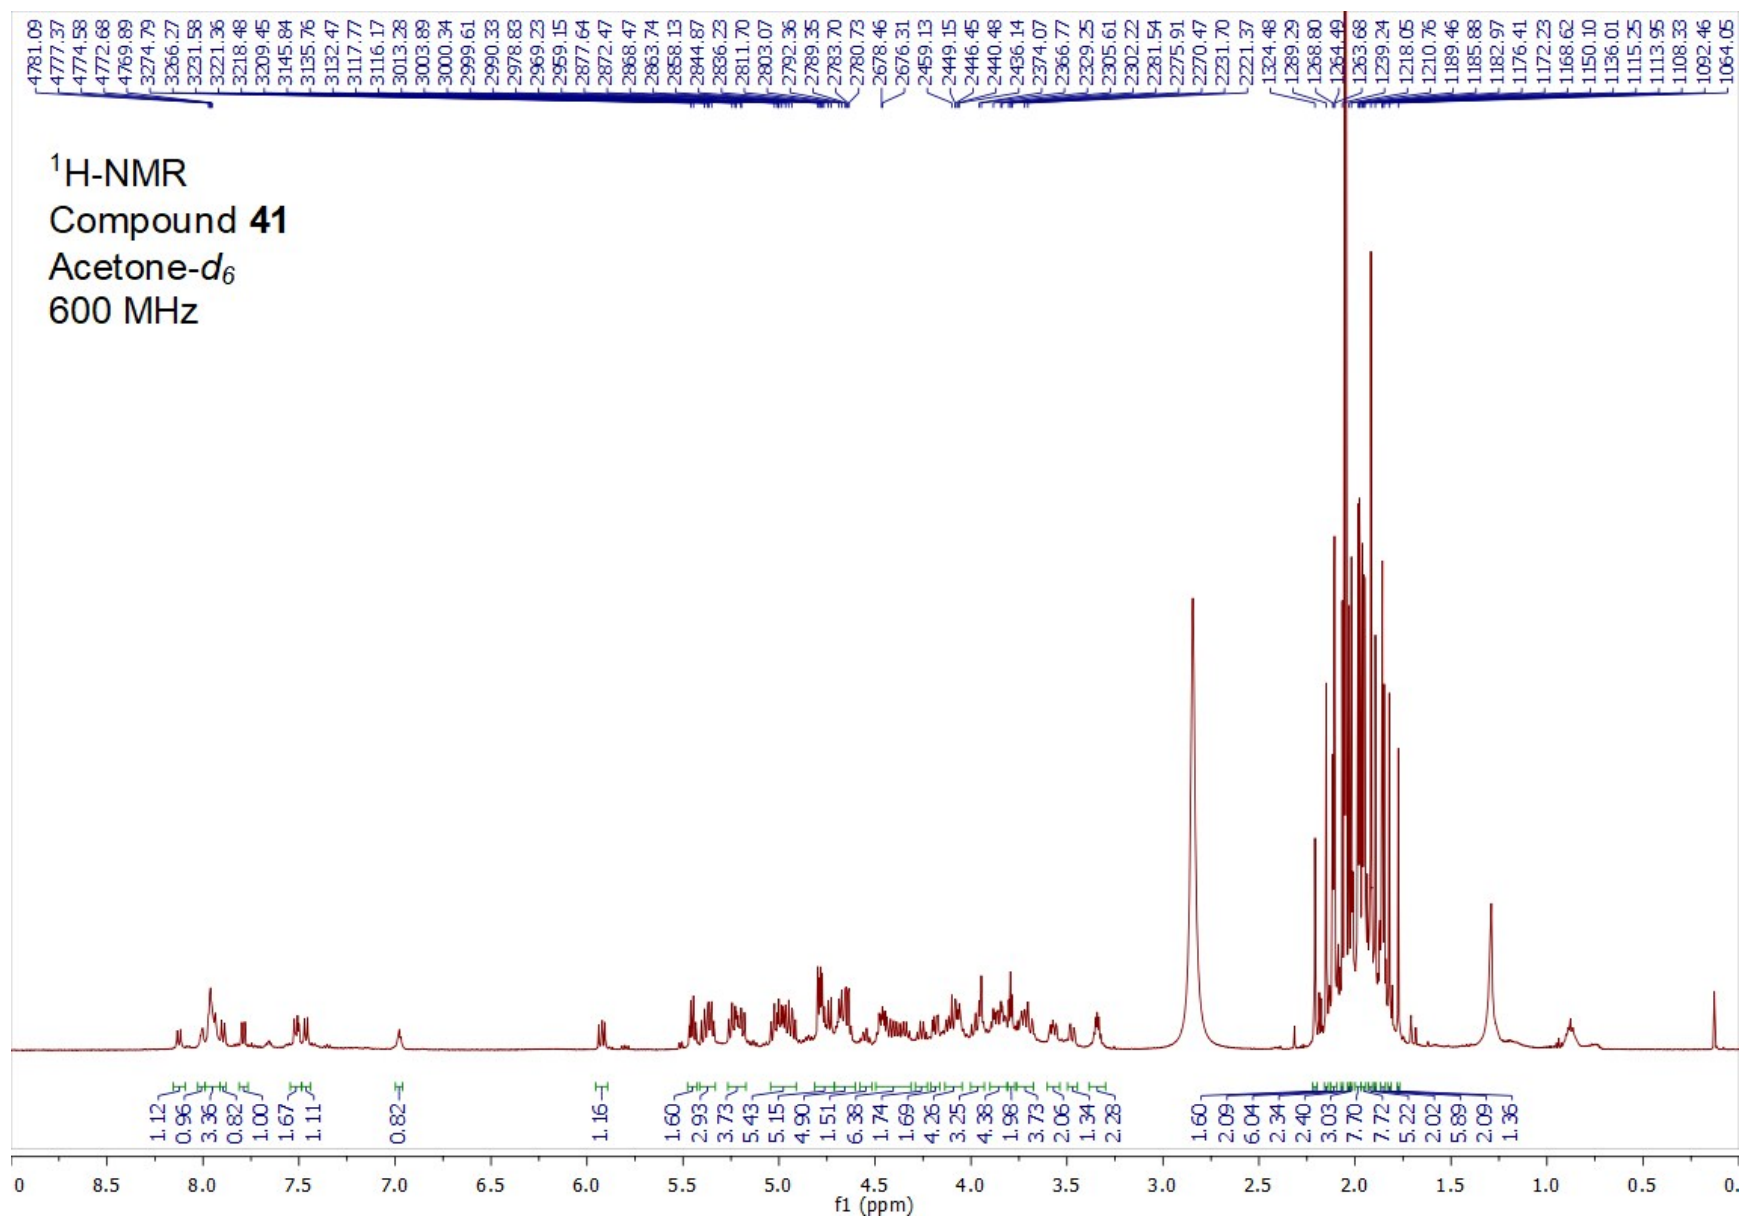



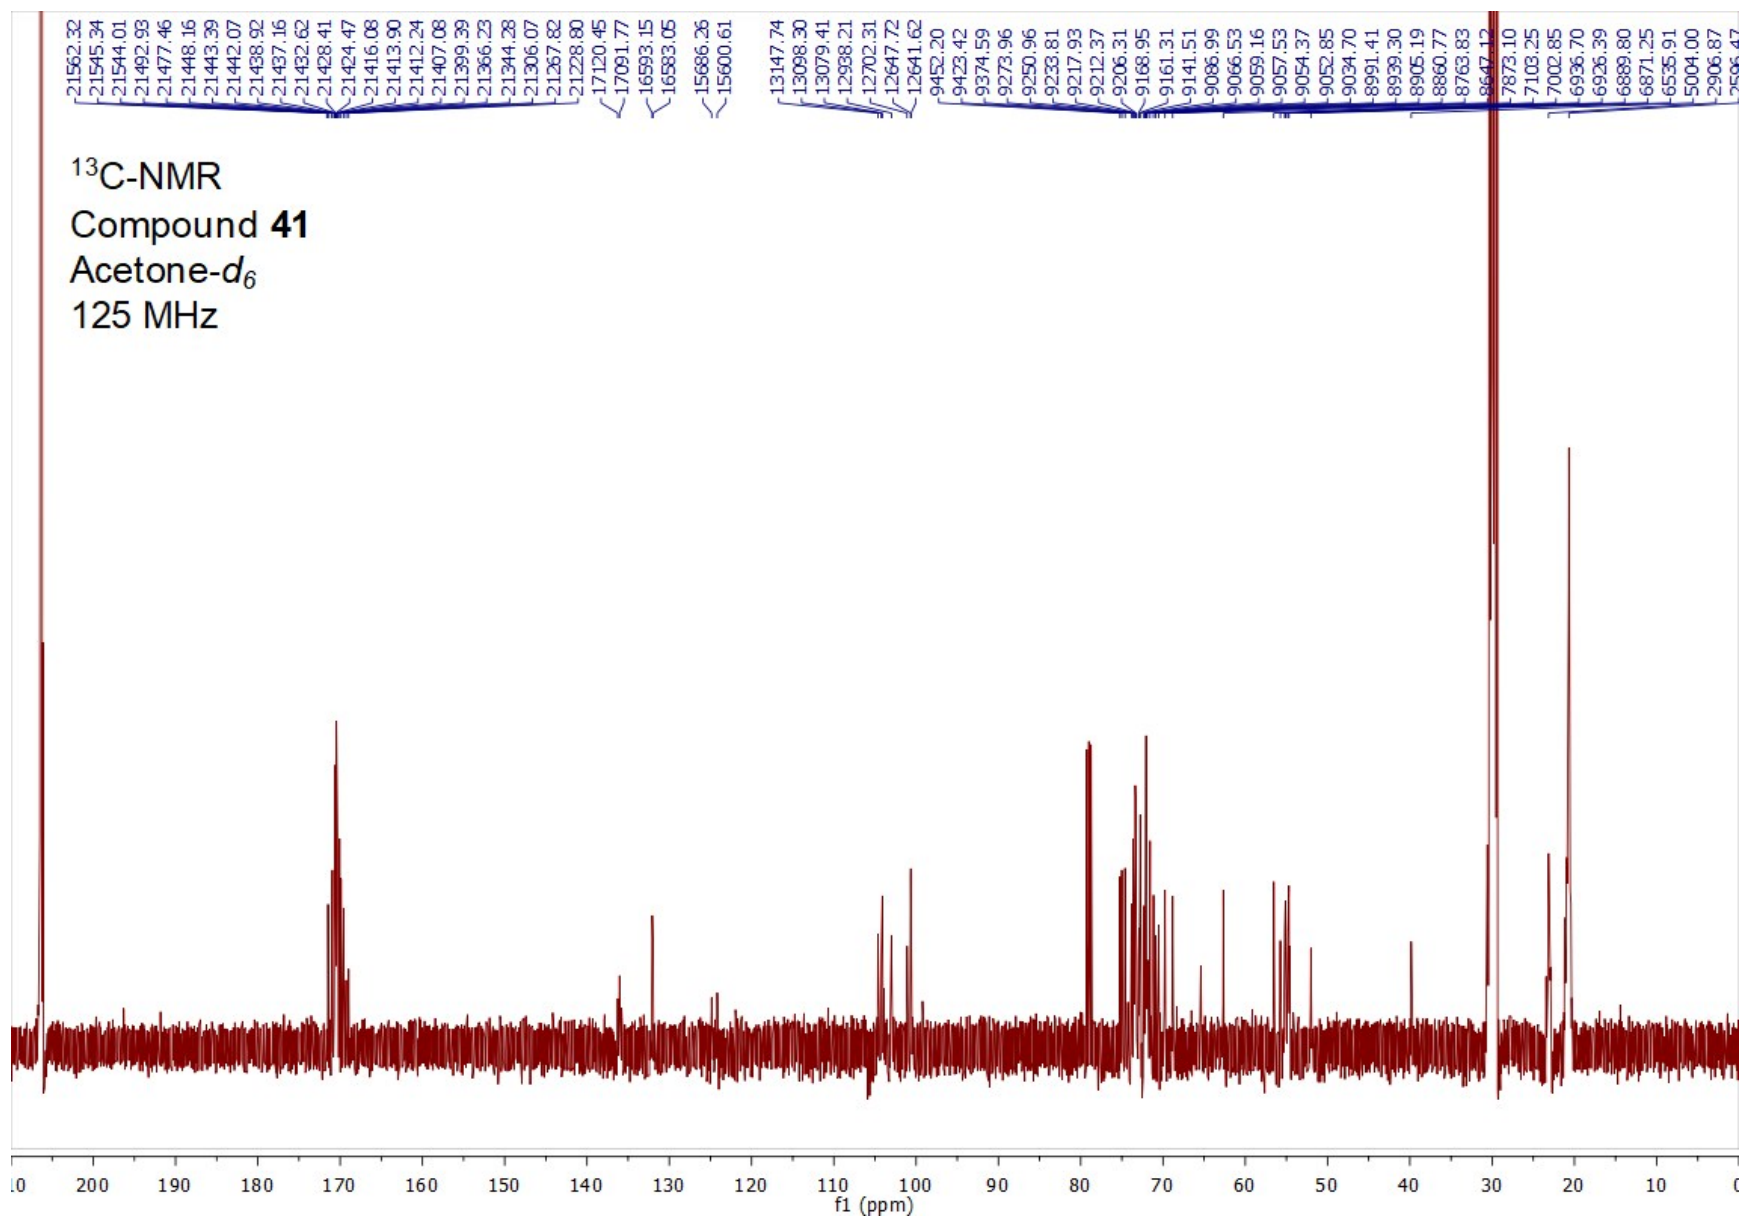

<sup>1</sup>H-NMR  
Compound **44**  
Deuterium Oxide  
600 MHz

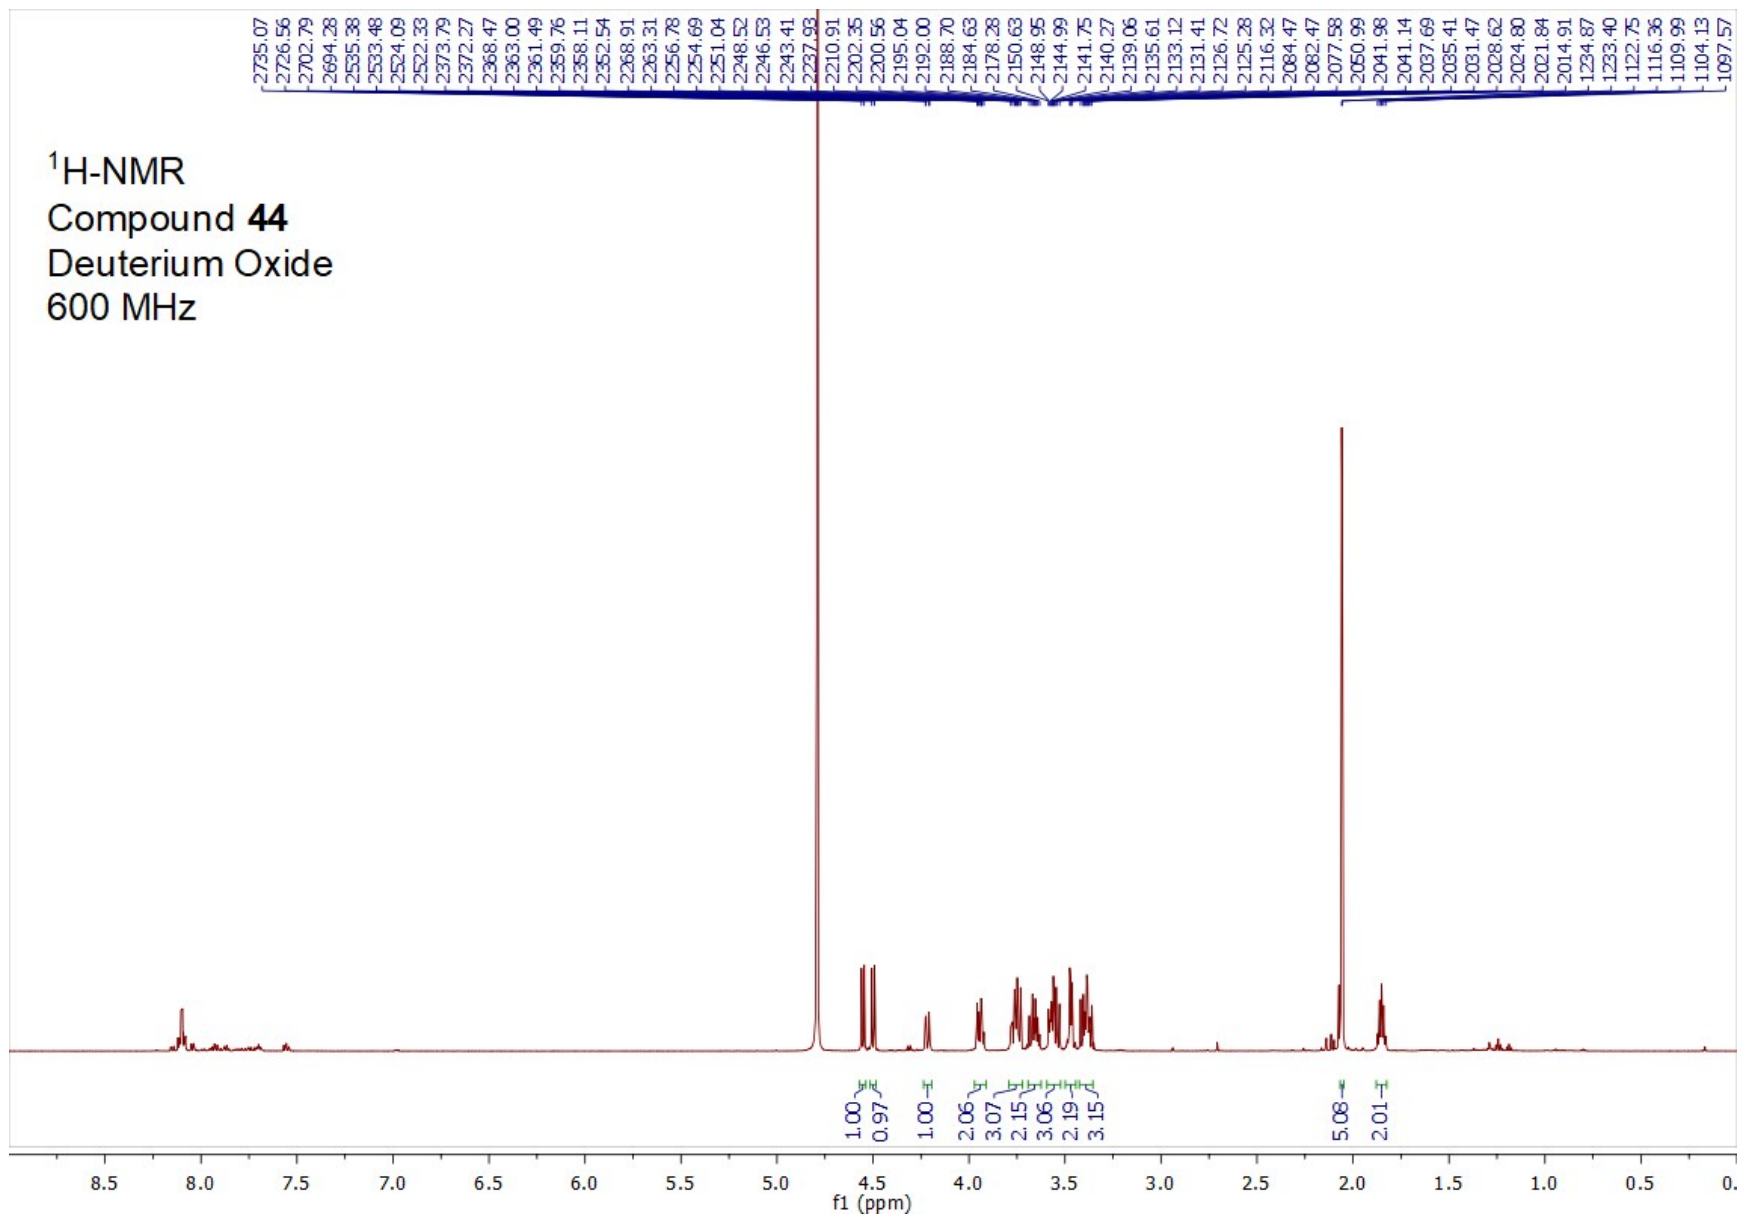

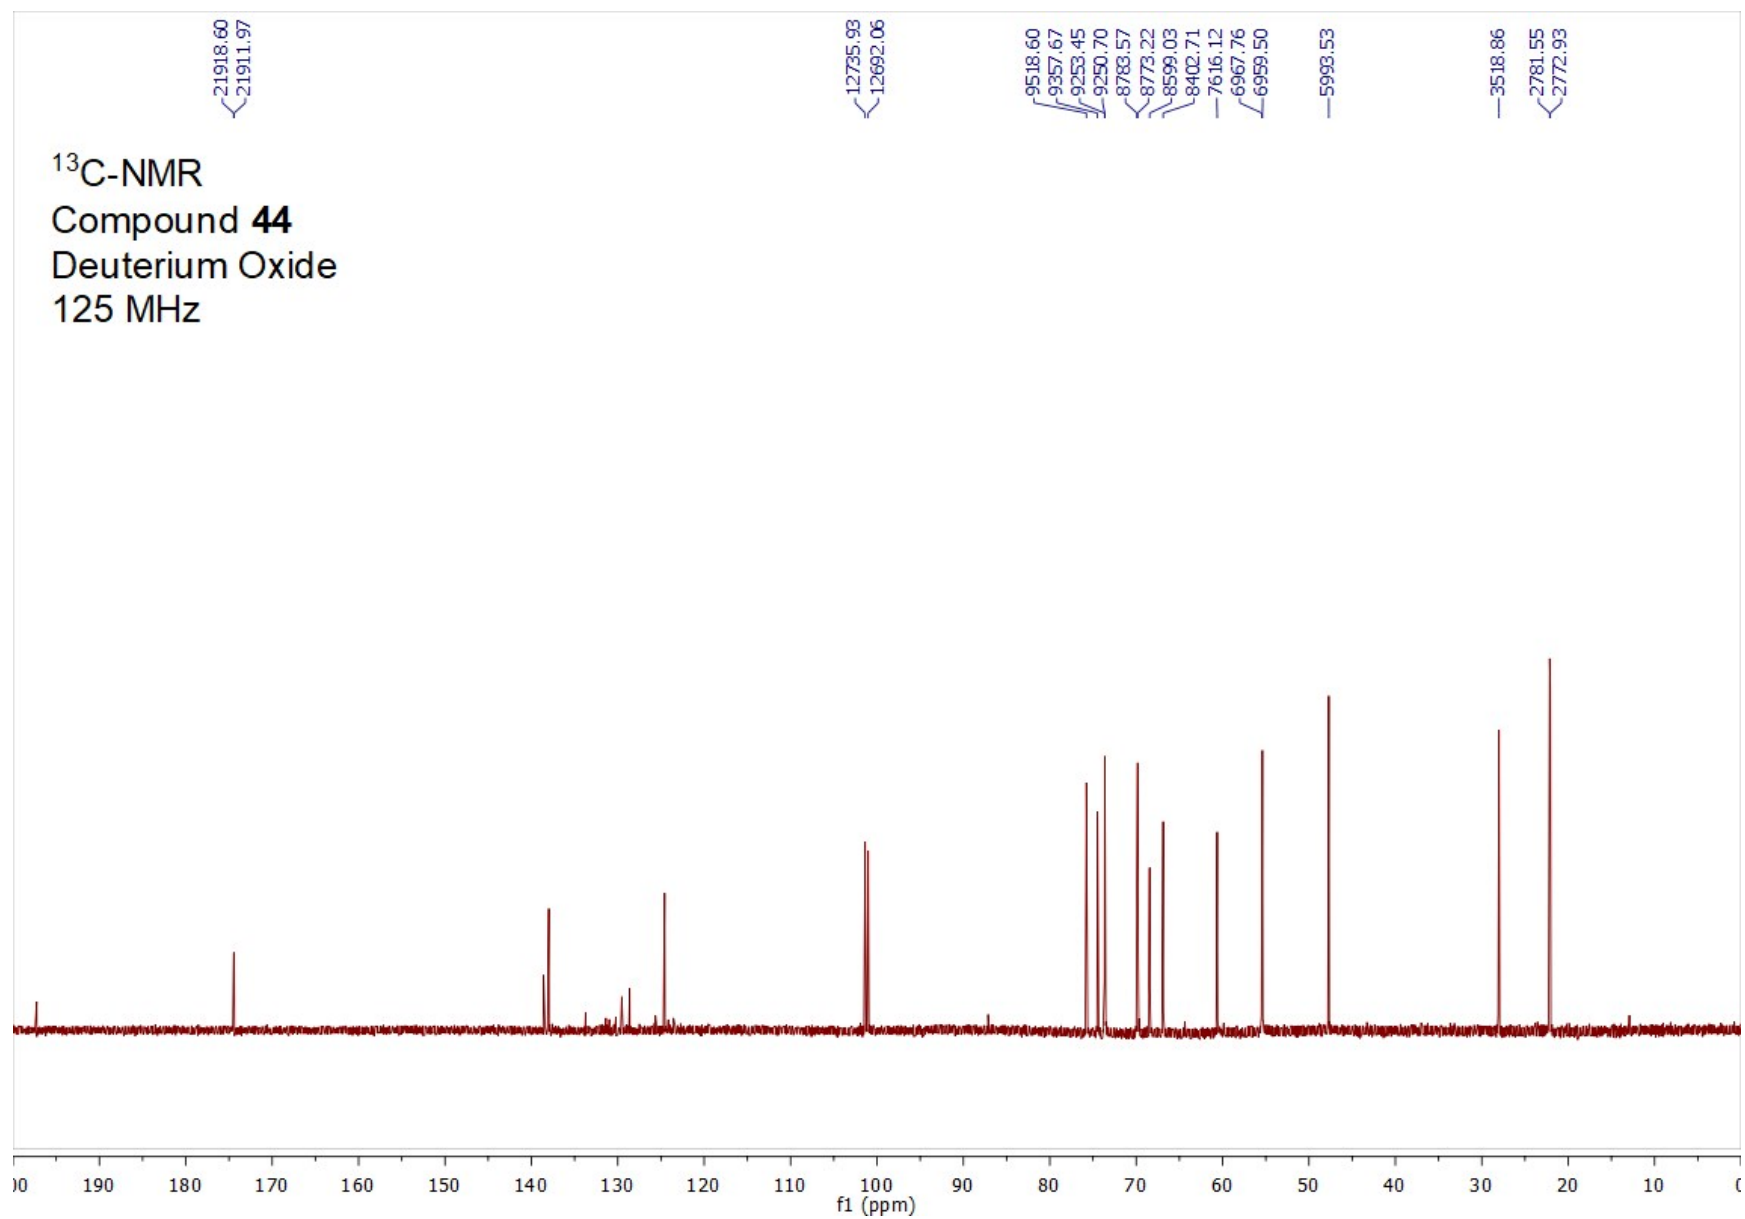



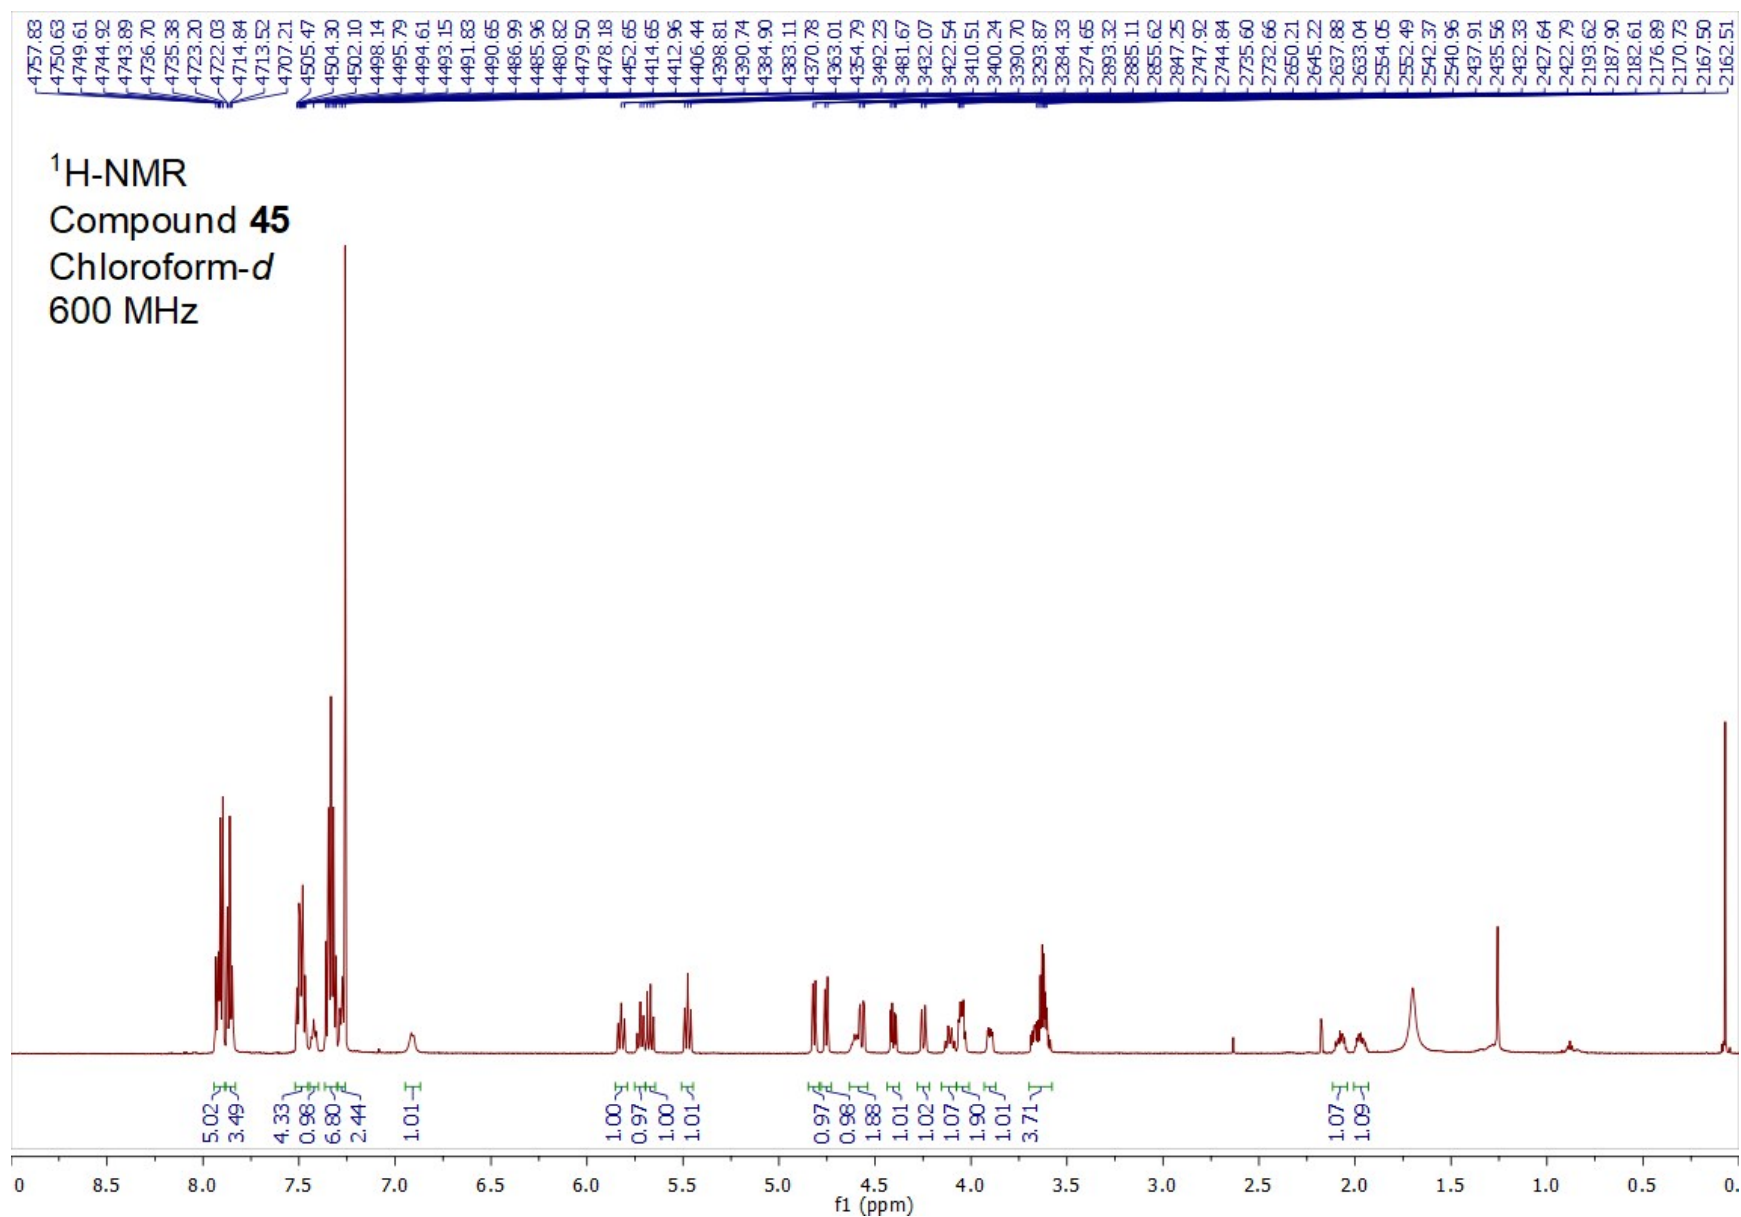

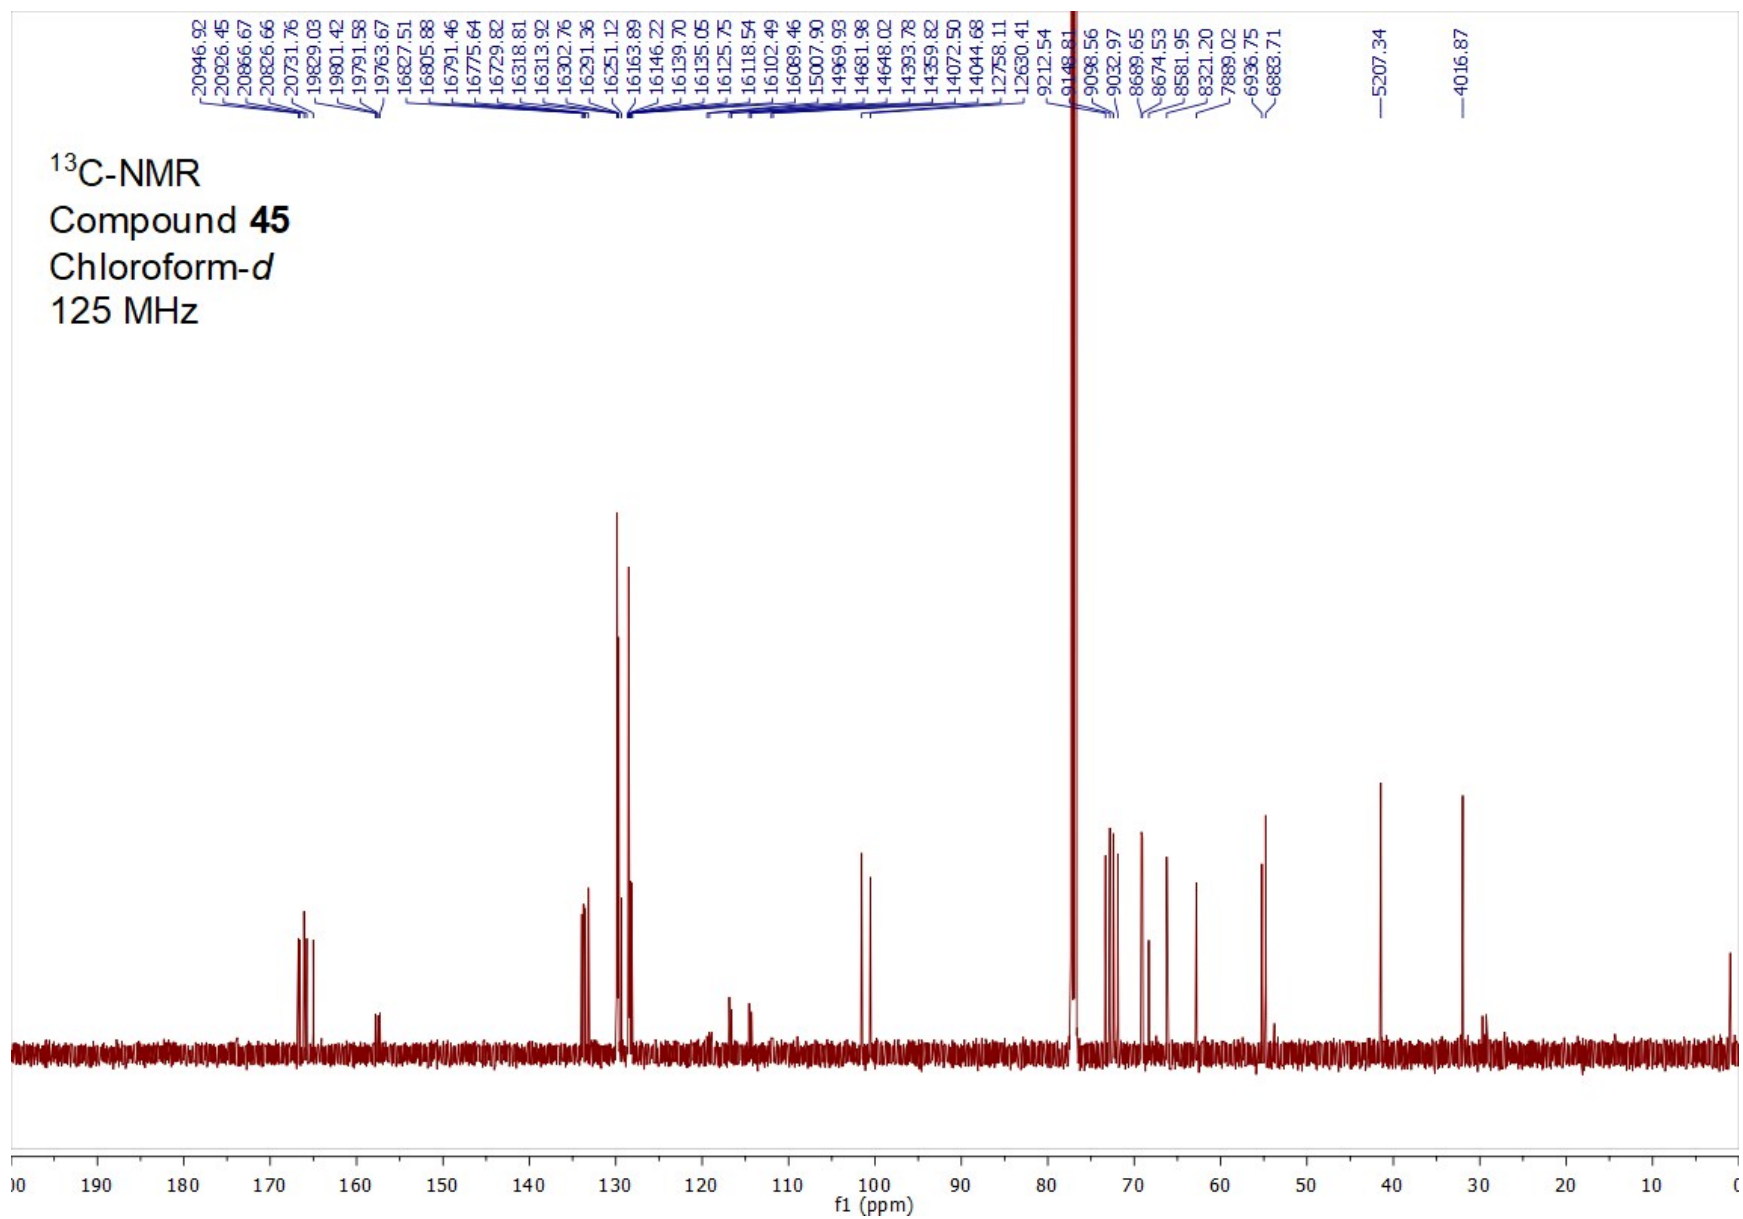

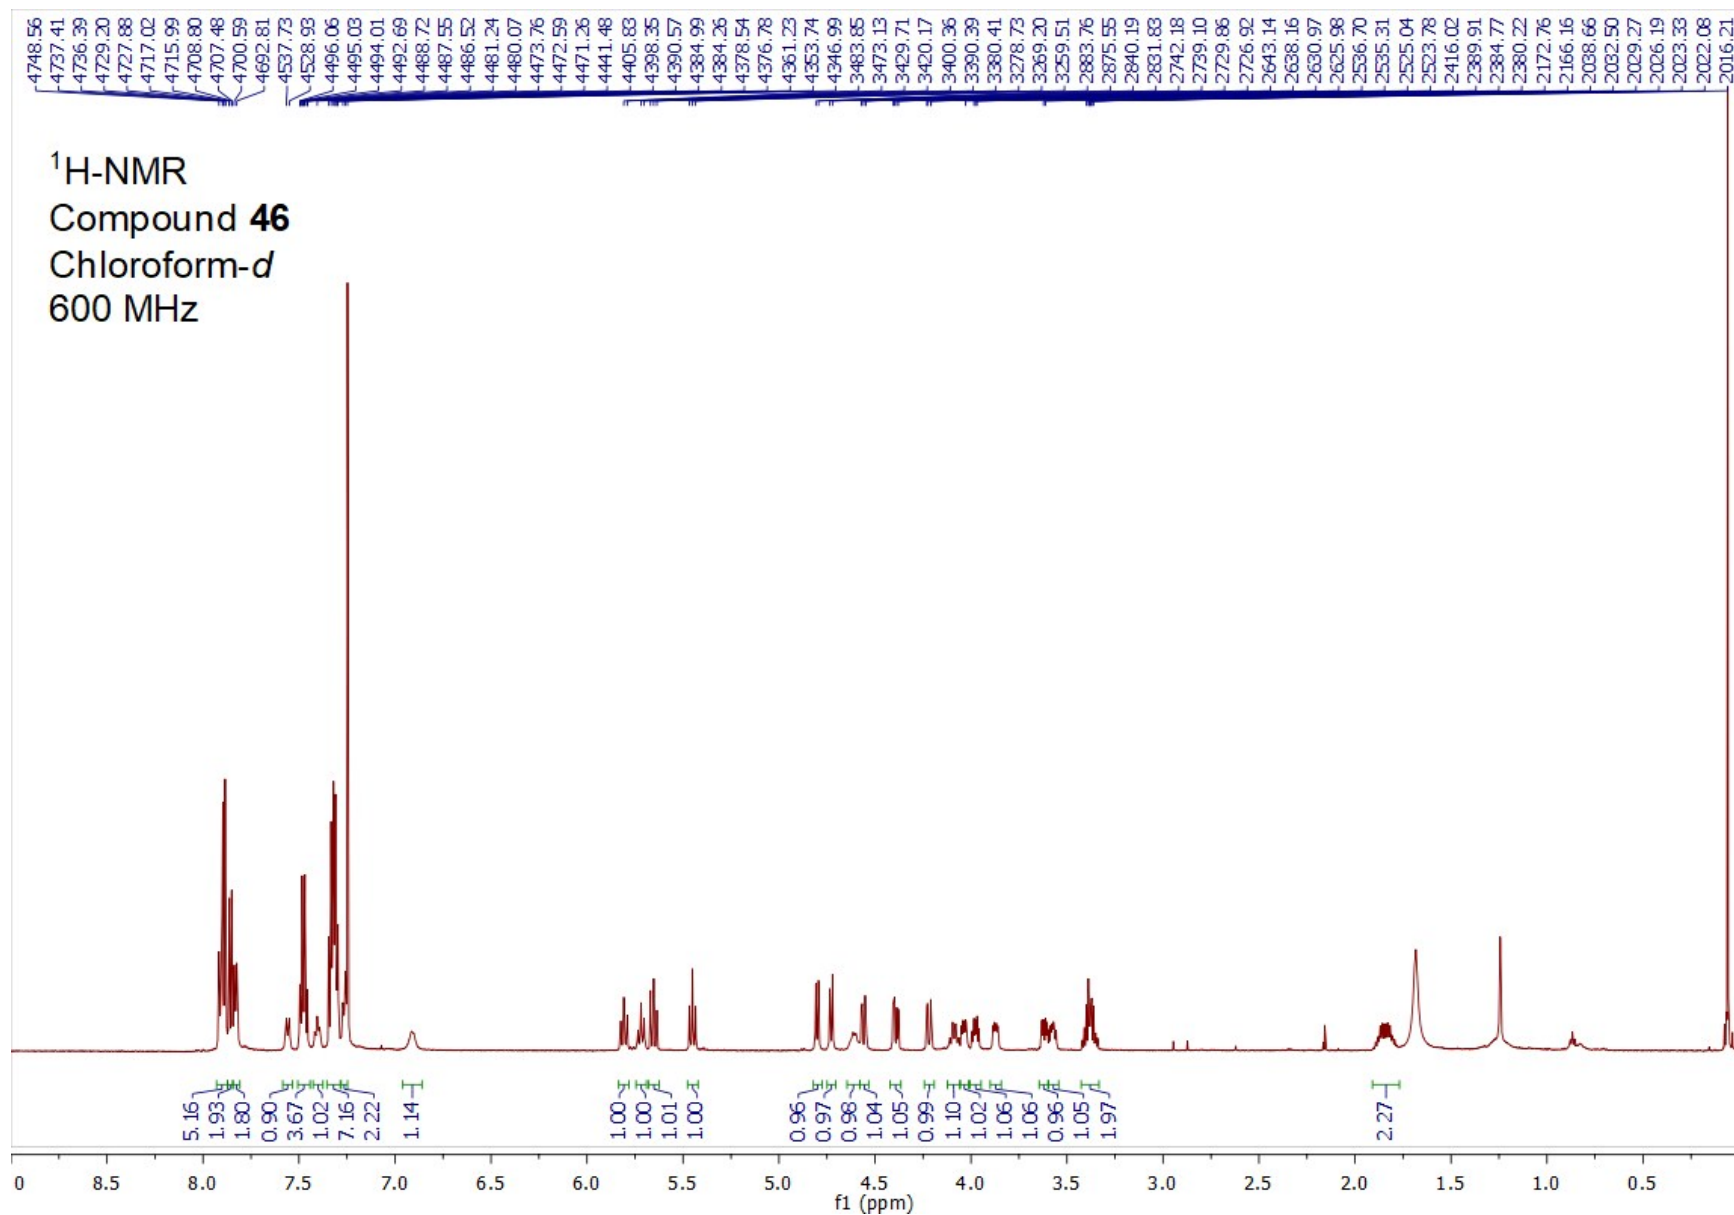

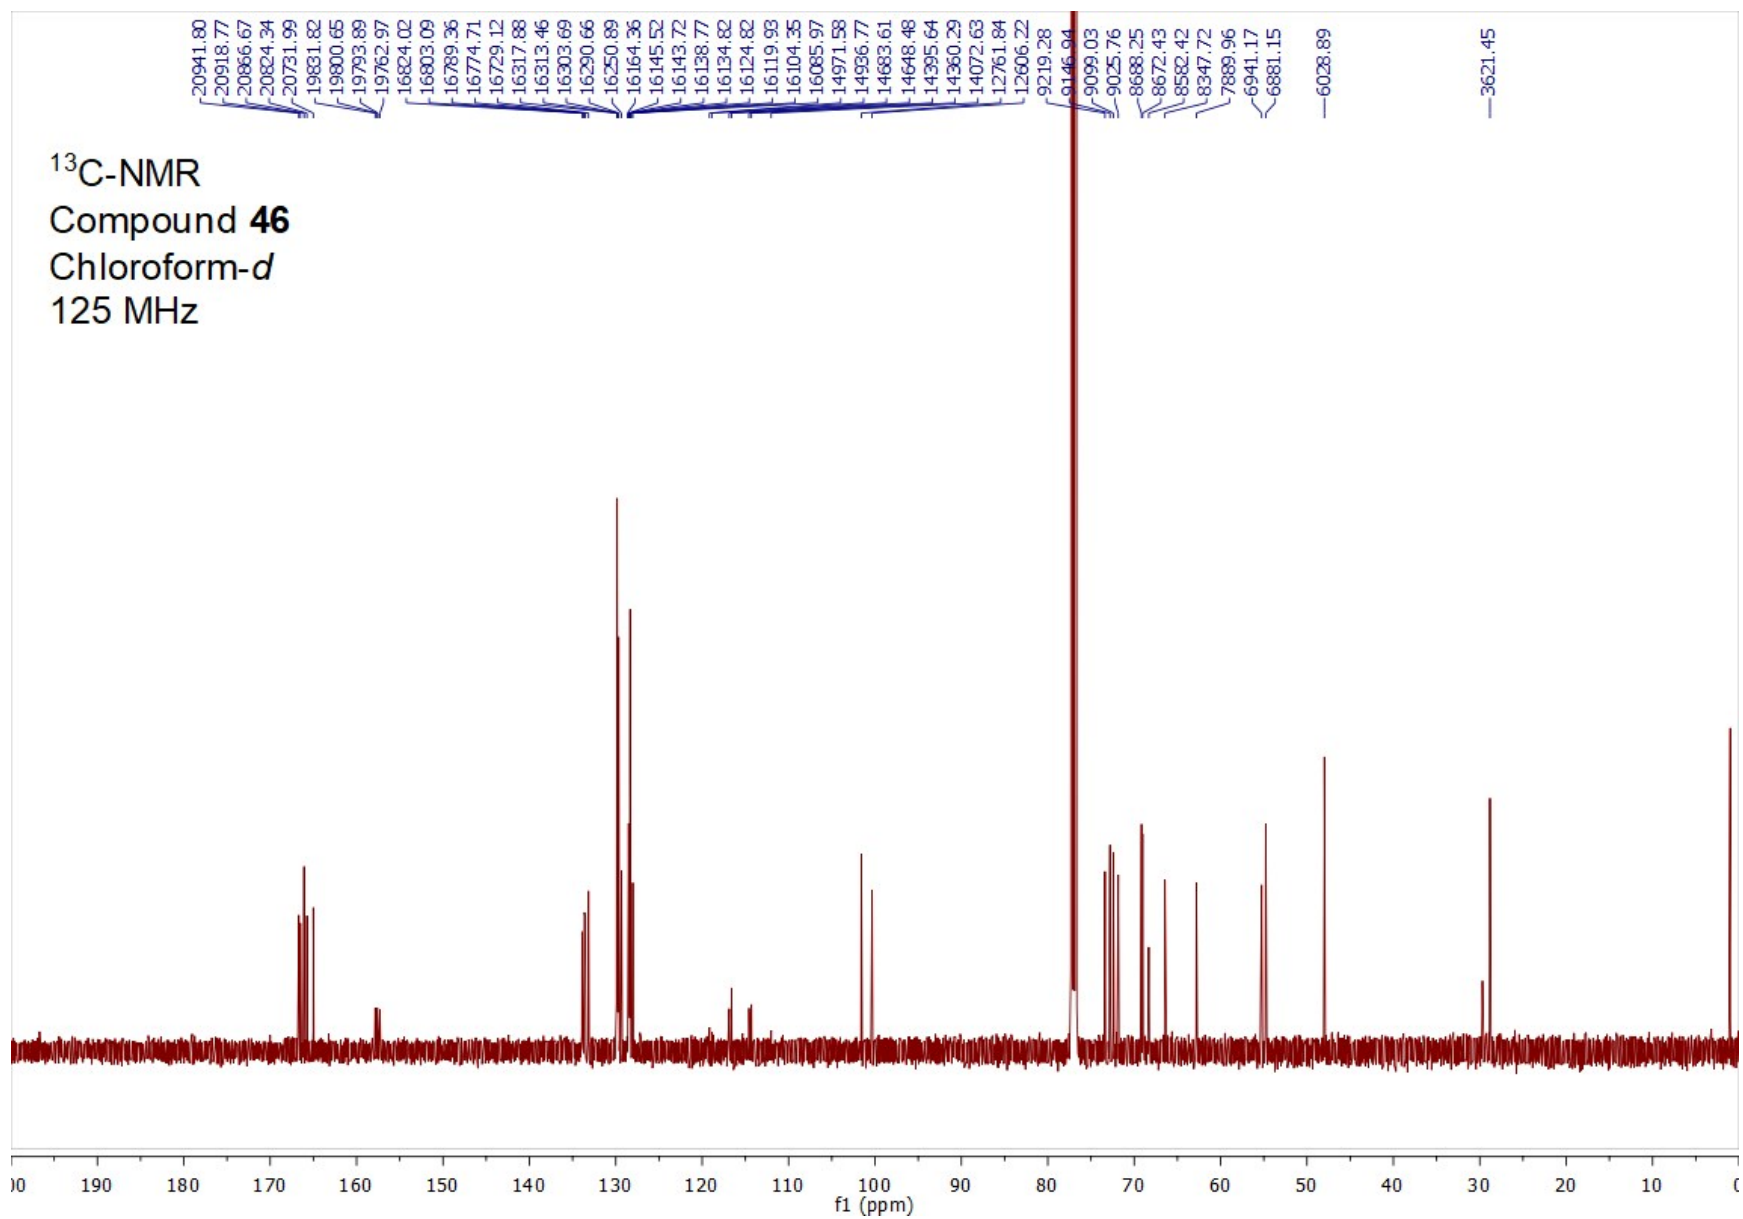

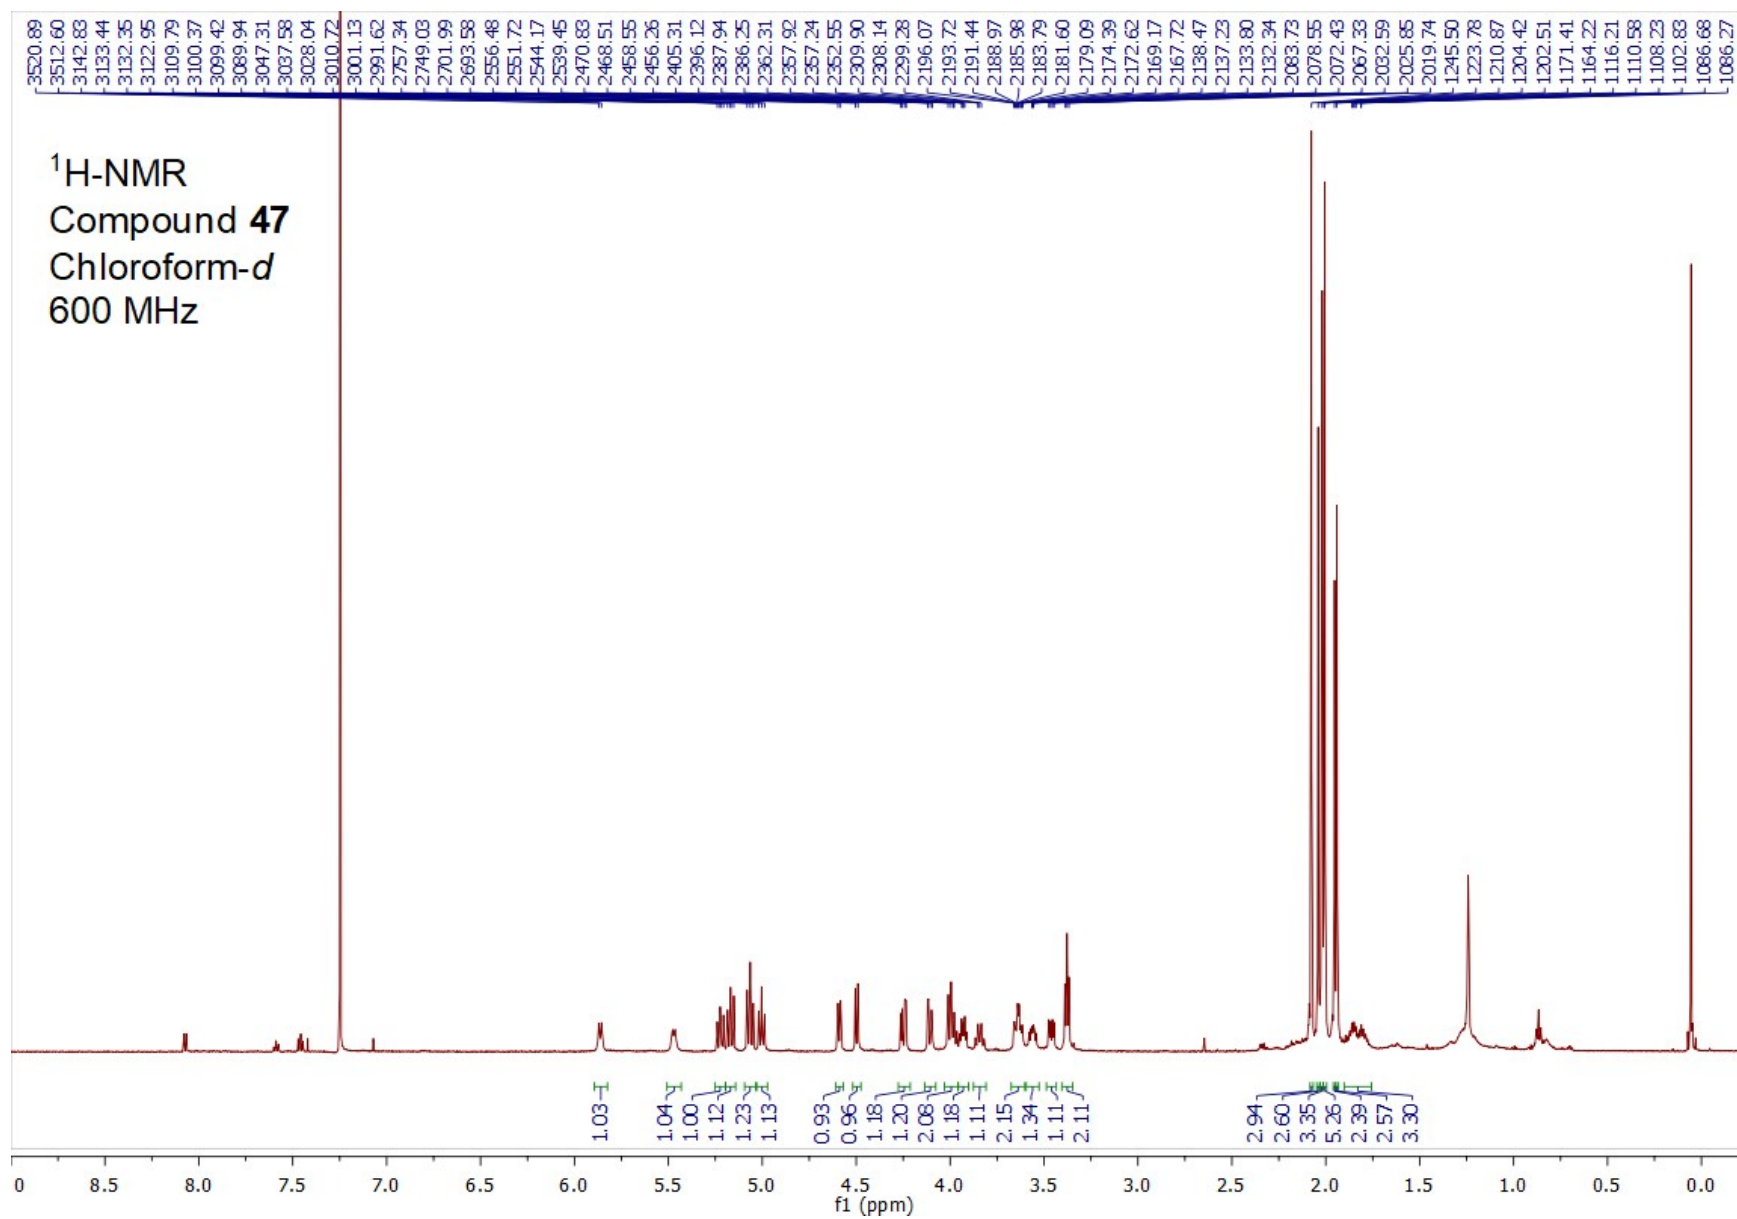

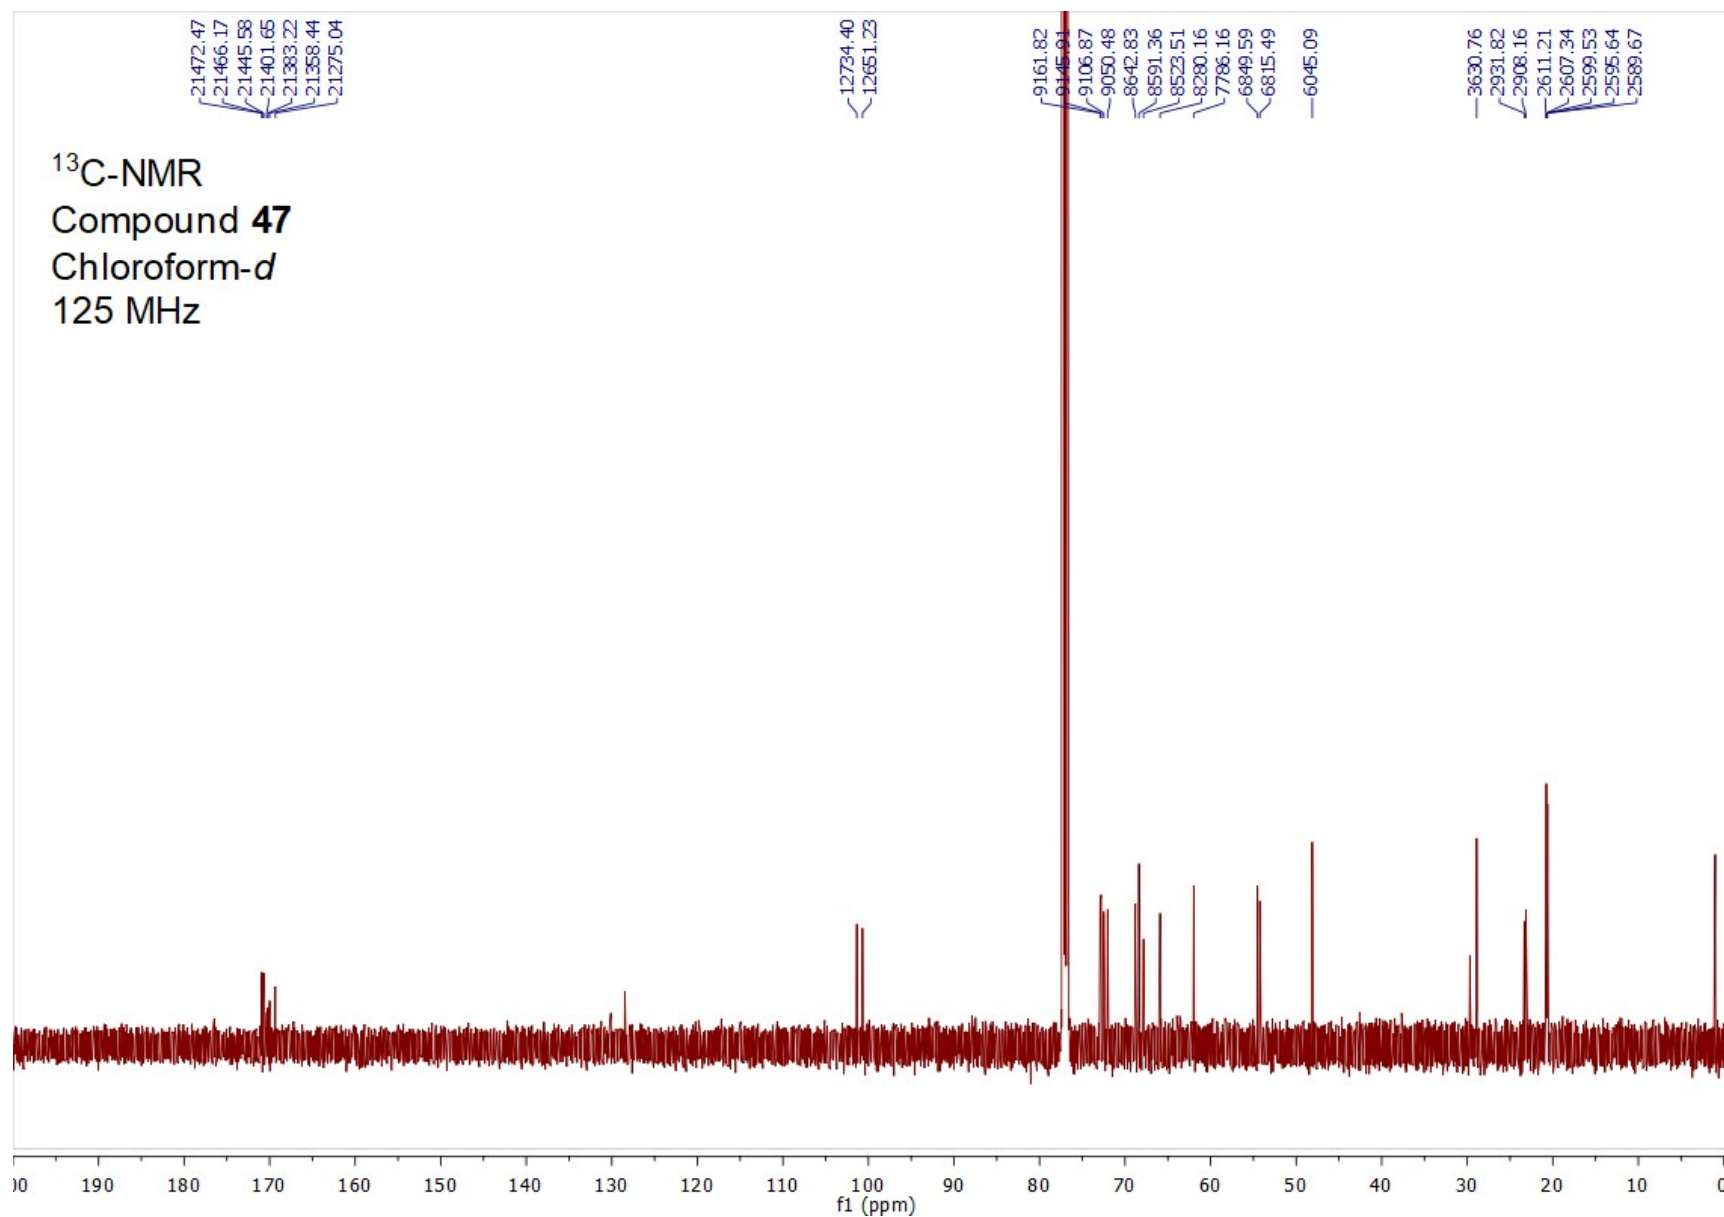

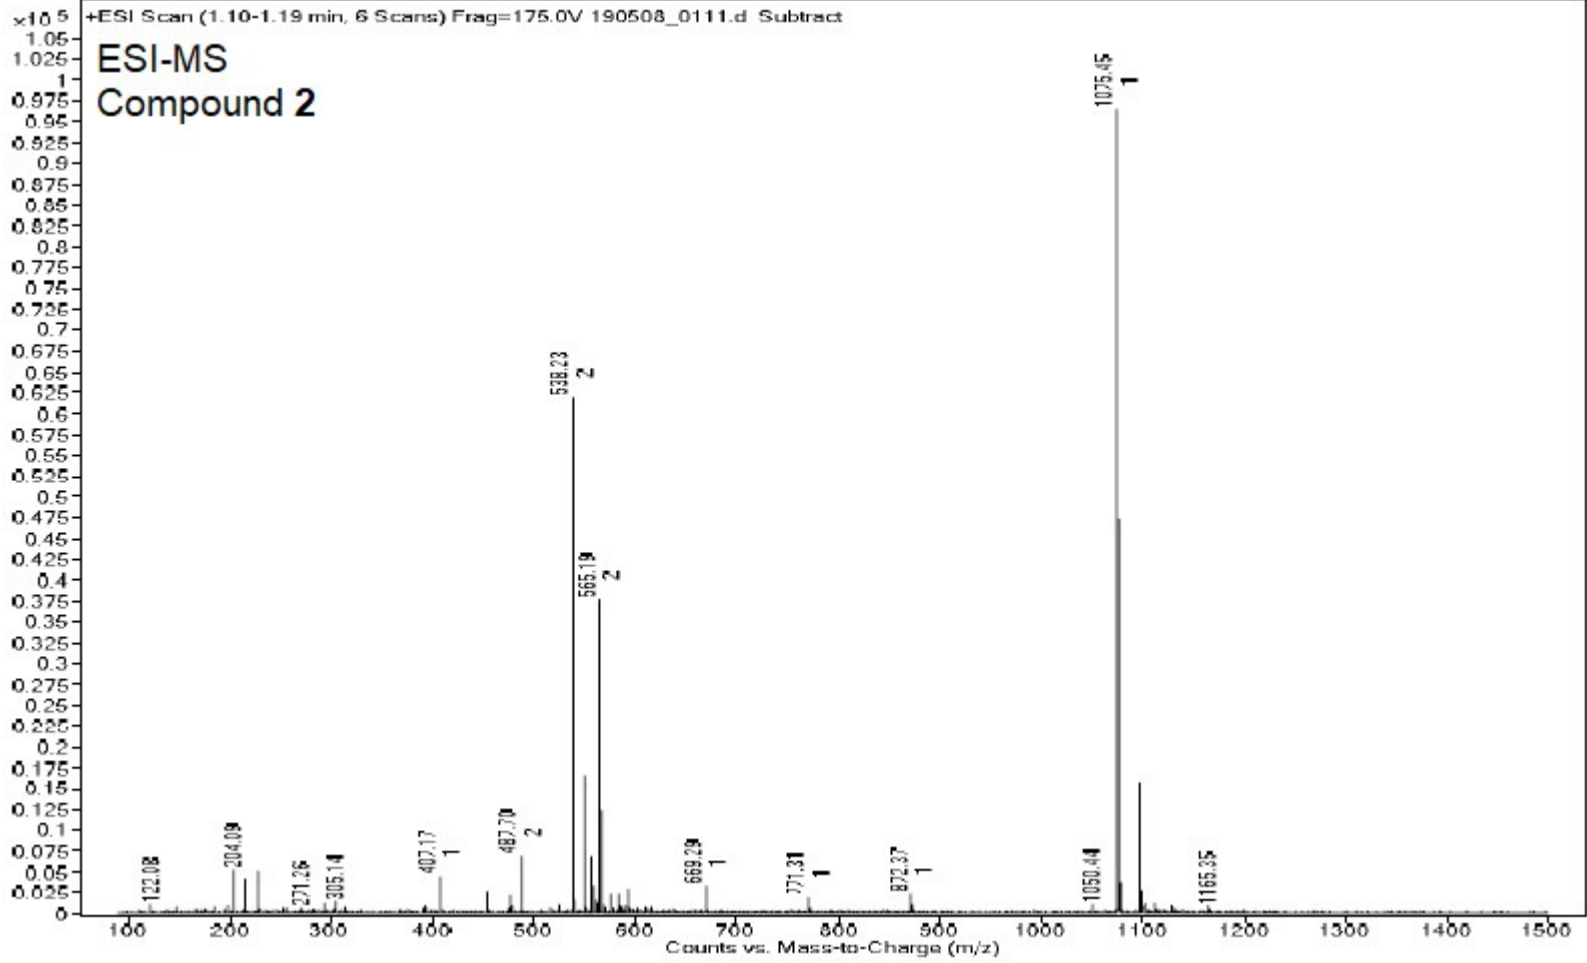

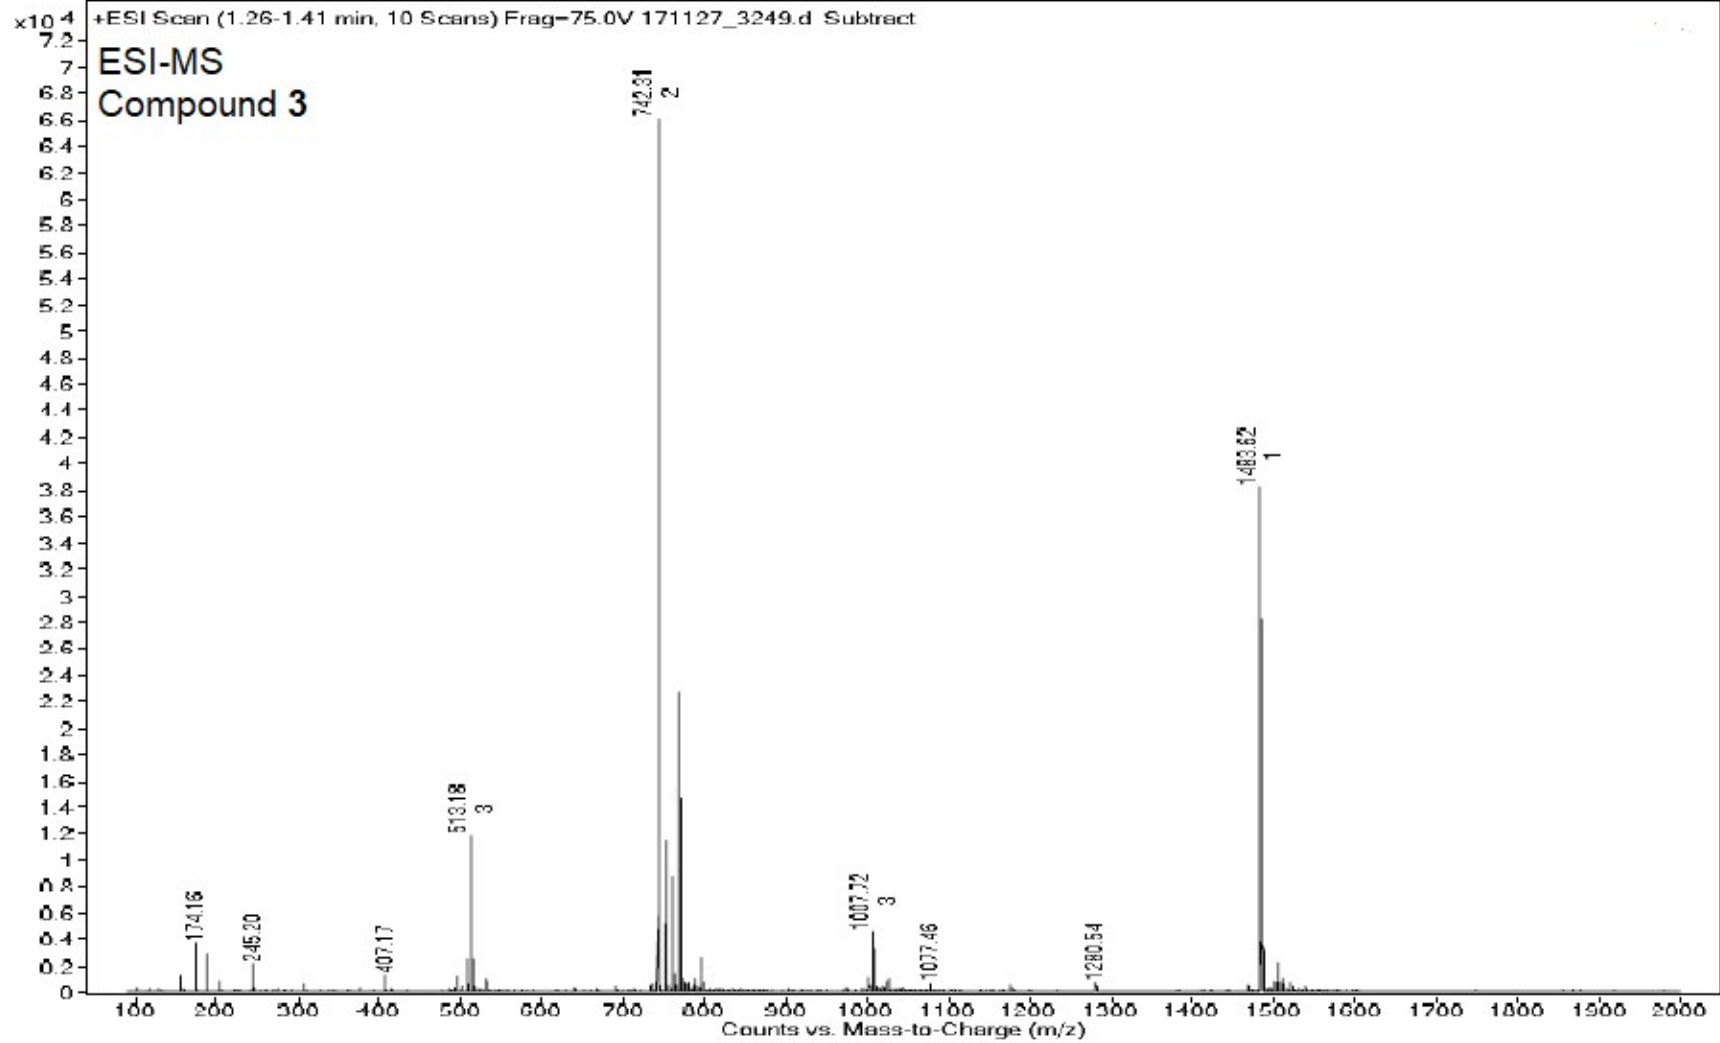



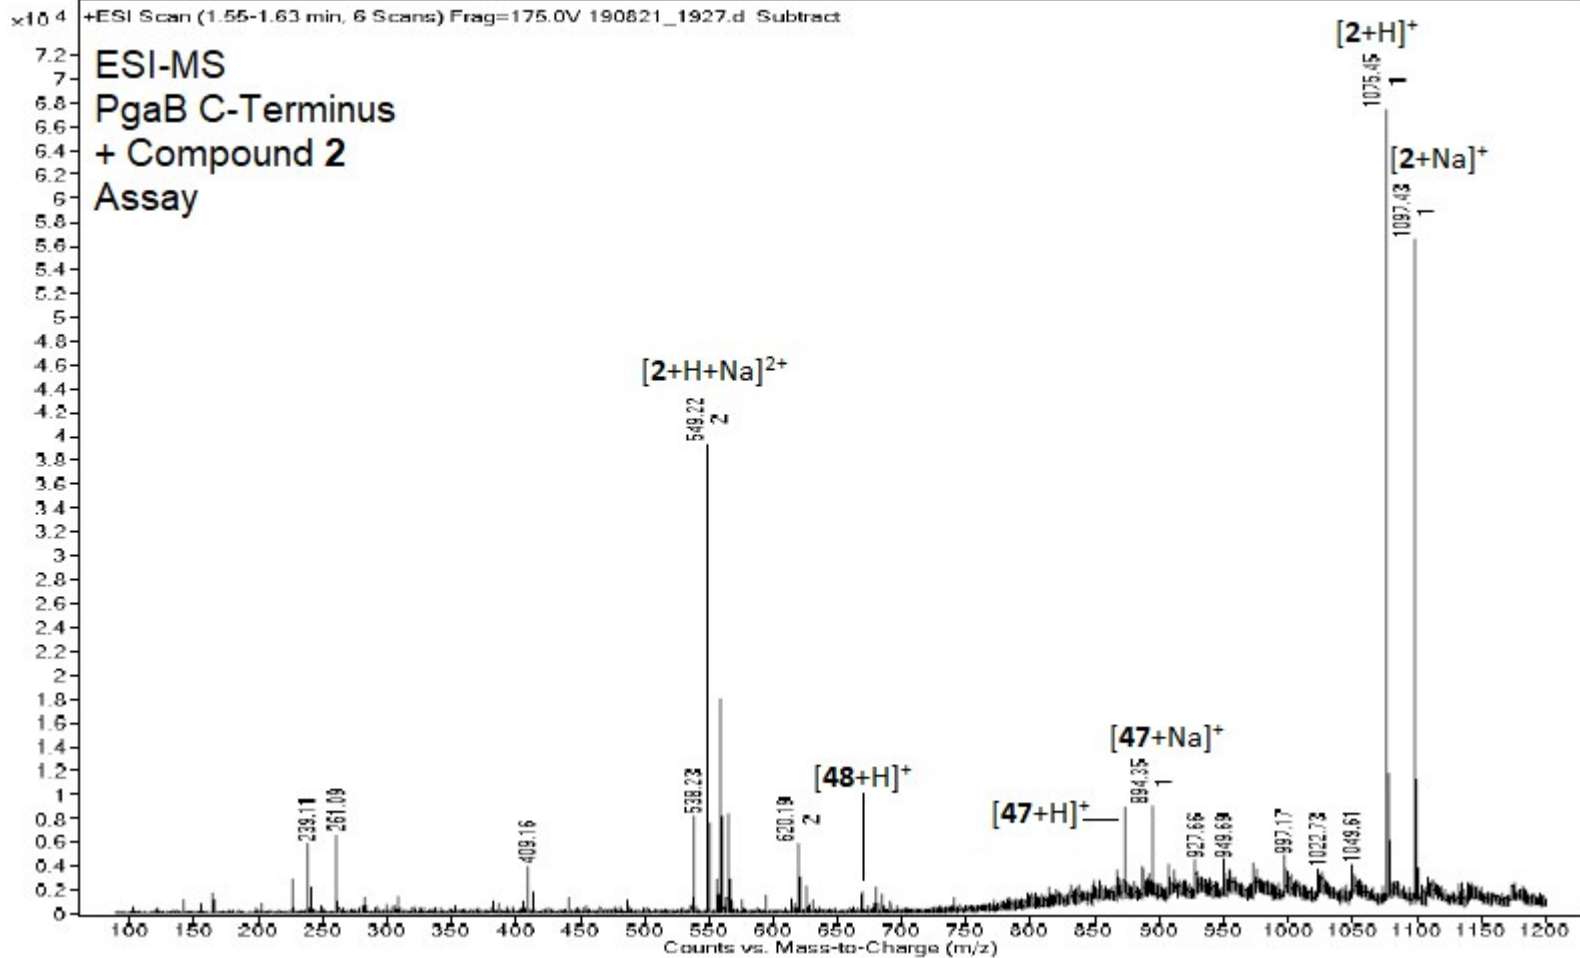

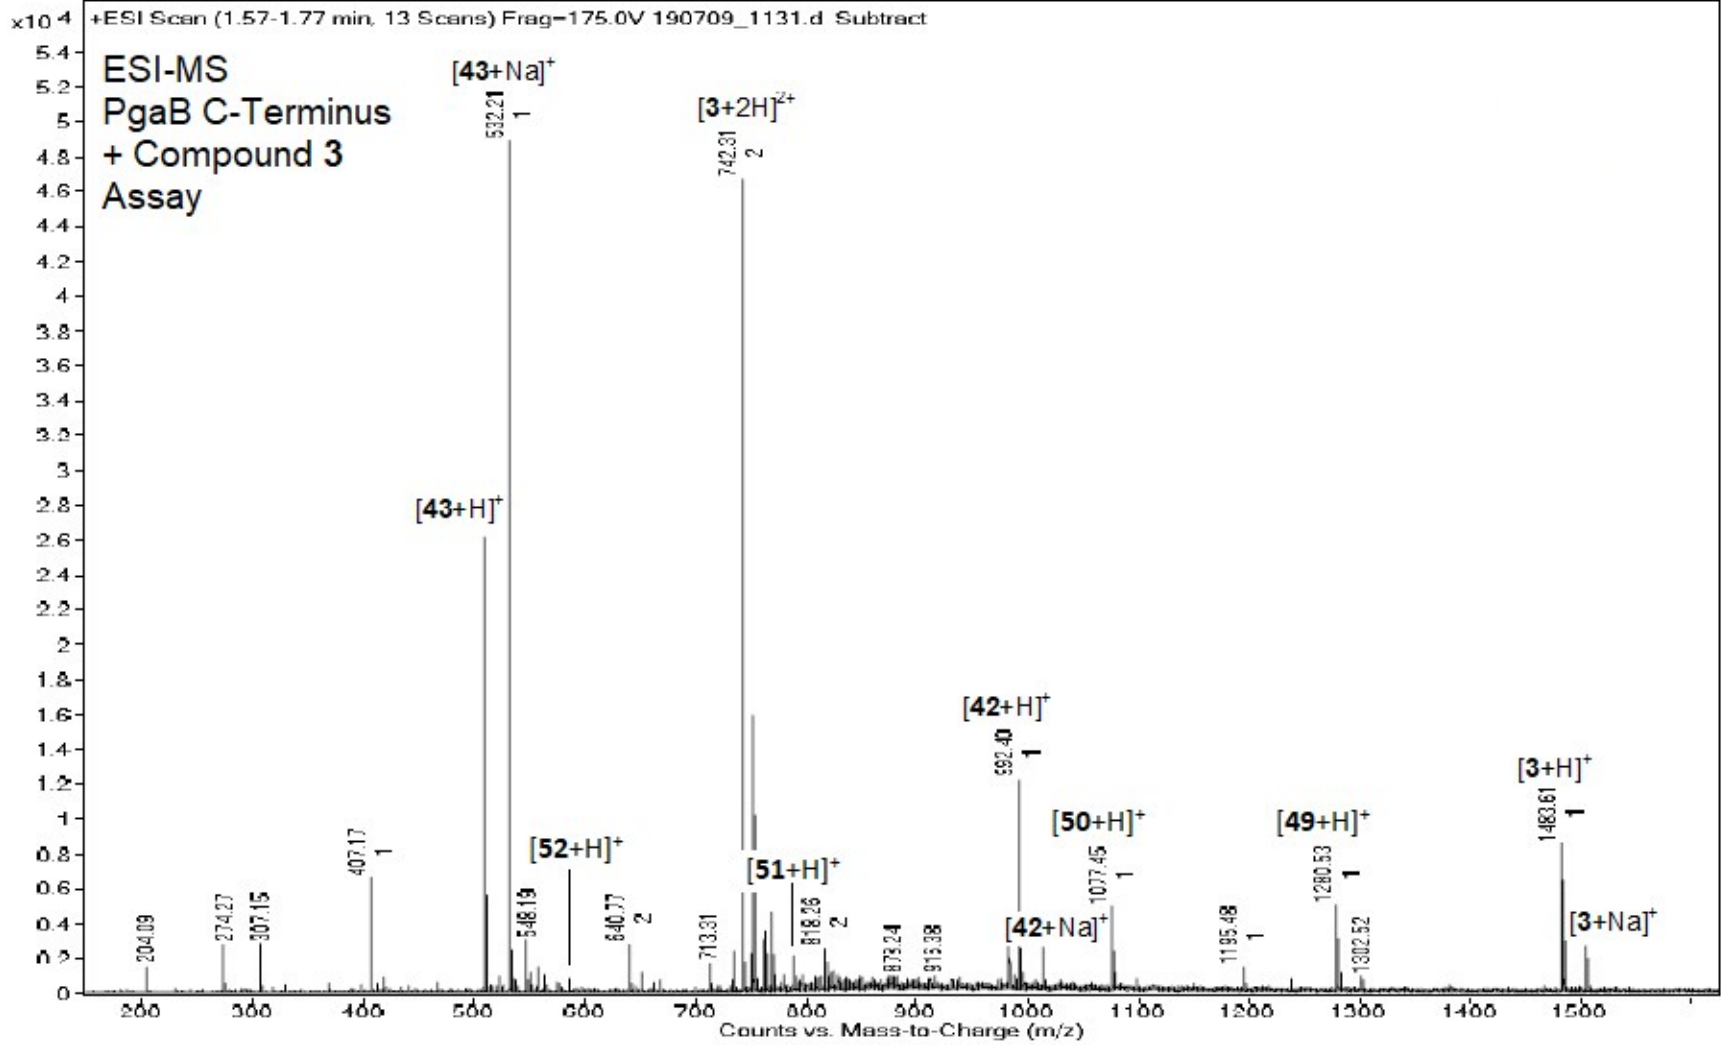

## References

- 1 *WO Pat.*, 055925, 2006.
- 2 E. V. Sukhova, A. V. Dubrovskii, Y. E. Tsvetkov and N. E. Nifantiev, *Russ. Chem. Bull.*, 2007, **56**, 1655–1670.
- 3 M. L. Wolfrom and H. B. Bhat, *Chem. Commun. (London)*, 1966, 146a.
- 4 M. L. Wolfrom and H. B. Bhat, *J. Org. Chem.*, 1967, **32**, 1821–1823.
- 5 A. A. Joseph, V. M. Dhurandhare, C.-W. Chang, V. P. Verma, G. P. Mishra, C.-C. Ku, C.-C. Lin and C.-C. Wang, *Chem. Commun.*, 2015, **51**, 104–106.
- 6 *US Pat.*, 0004052, 2005.
- 7 M. Fridman, V. Belakhov, L. V. Lee, F.-S. Liang, C.-H. Wong and T. Baasov, *Angew. Chem. Int. Ed.*, 2005, **44**, 447–452.
- 8 A. F. G. Bongat, M. N. Kamat and A. V. Demchenko, *J. Org. Chem.*, 2007, **72**, 1480–1483.
- 9 D. Horton, *Org. Synth.*, 1966, **46**, 1–5.
